# Supplementary material
Source: PubMed Central journal article supplement (PMC3045639)

# Supporting Information

## One-Pot Multicomponent Synthesis of Tetra- and Penta-substituted 2-Aminopyrroles. A Short General Synthesis of Rigidins A, B, C, and D

Liliya V. Frolova,<sup>‡</sup> Nikolai M. Evdokimov,<sup>‡</sup> Kathryn Hayden,<sup>§</sup> Indranil Malik,<sup>§</sup> Snezna Rogelj,<sup>§</sup>  
Alexander Kornienko,<sup>‡</sup> and Igor V. Magedov<sup>‡,\*</sup>

<sup>‡</sup>*Department of Chemistry, New Mexico Institute of Mining and Technology, Socorro, New Mexico 87801.*

<sup>§</sup>*Department of Chemistry, New Mexico Institute of Mining and Technology, Socorro, New Mexico 87801.*

### Table of Contents

|                                                                                                                         |            |
|-------------------------------------------------------------------------------------------------------------------------|------------|
| Materials and Methods                                                                                                   | S2         |
| General Procedure for the Synthesis of <b>1</b> , and <b>2</b> ; Spectral Data                                          | S2         |
| General Procedure for the Synthesis of Pyrroles <b>A</b> <sub>1</sub> - <b>A</b> <sub>17</sub> ; Spectral Data          | S3 – S5    |
| General Procedure for the Synthesis of Pyrroles <b>B</b> <sub>1</sub> - <b>B</b> <sub>5</sub> ; Spectral Data           | S5 – S6    |
| General Procedure for the Synthesis of Pyrroles <b>B</b> <sub>5</sub> - <b>B</b> <sub>15</sub> ; Spectral Data          | S6 – S7    |
| General Procedure for the Synthesis of Pyrroles <b>B</b> <sub>16</sub> - <b>B</b> <sub>21</sub> ; Spectral Data         | S7 – S8    |
| General Procedure for the Synthesis of Protected Rigidins <b>C</b> <sub>1</sub> - <b>C</b> <sub>4</sub> ; Spectral Data | S8 – S9    |
| Synthesis of Rigidins <b>A</b> , <b>B</b> , <b>C</b> and <b>D</b> ; Spectral Data                                       | S9 – S10   |
| <sup>1</sup> H and <sup>13</sup> C NMR Spectra                                                                          | S11 – S107 |

## Materials and Methods

All reagents, solvents and catalysts were purchased from commercial sources (Acros Organics and Sigma-Aldrich) and used without purification. *2-amino-4'-benzyloxy-acetophenone HCl* for the synthesis of **1**, and *2-amino-3'-methoxy-4'-benzyloxy-acetophenone HCl* for the synthesis of **2** were purchased from Amatek Chemical and used without further purification. All reactions were performed in an oven dried flasks open to the atmosphere or under nitrogen and monitored by thin layer chromatography on TLC precoated (250  $\mu\text{m}$ ) silica gel 60 F<sub>254</sub> glass-backed plates (EMD Chemicals Inc.). Visualization was accomplished with UV light. Flash column chromatography was performed on silica gel (32-63  $\mu\text{m}$ , 60  $\text{\AA}$  pore size). <sup>1</sup>H and <sup>13</sup>C NMR spectra were recorded on Jeol Eclipse 300 or Bruker Avance III 400 spectrometers. Chemical shifts ( $\delta$ ) are reported in ppm relative to the TMS internal standard. Abbreviations are as follows: s (singlet), d (doublet), t (triplet), q (quartet), m (multiplet). HRMS analyses were performed at the Mass Spectrometry Facility, University of New Mexico. Samples were run on LCT Premier TOF mass spec.

## General Procedure for the Synthesis of **1** and **2**.

Hydrochloride of a substituted phenacyl amine (1 mmol) was dissolved in a mixture of H<sub>2</sub>O/acetone (1:2, 6 mL). The solution was stirred and methanesulfonyl chloride (0.116 mL, 1.5 mmol) was added in one portion. The mixture was placed in an ice-bath and triethylamine (0.348 mL, 2.5 mmol) was added dropwise in 30 min. Once all reactants were added, acetone (14 mL) was added to the mixture and the ice-bath was removed. The reaction mixture was kept at room temperature for 10 h, and then the volatiles were evaporated under reduced pressure. To the obtained slurry were added EtOAc (20 mL) and saturated NH<sub>4</sub>Cl (30 mL), the organic layer was separated and washed with saturated NaHCO<sub>3</sub> (30 mL), followed by washing with saturated NaCl (20 mL). The extraction was repeated twice with EtOAc (15 mL) and the combined organic phases were dried with MgSO<sub>4</sub>. The evaporation of the solvent resulted in the desired product that 98% pure based on the NMR spectra.

***N*-2-[4-(Benzyloxy)phenyl]-2-oxoethylmethanesulfonamide (1)**. 97% as light yellow needles, mp = 118-120 °C, R<sub>f</sub> = 0.34 (MeOH/CH<sub>2</sub>Cl<sub>2</sub>=1/50). <sup>1</sup>H NMR (CDCl<sub>3</sub>)  $\delta$ : 3.02 (s, 3H), 4.63 (d, *J* = 4.1 Hz, 2H), 5.18 (s, 2H), 5.43 (bs, 1H), 7.07 (d, *J* = 8.6 Hz, 2H), 7.38-7.46 (m, 5H), 7.94 (d, *J* = 8.6 Hz, 2H). <sup>13</sup>C NMR (acetone-*d*<sub>6</sub>)  $\delta$ : 40.6, 49.8, 70.8, 115.7, 128.5, 128.7, 128.9, 129.4, 131.1, 137.6, 162.3, 164.2, 193.3. HRMS *m/z* (ESI<sup>+</sup>) calc'd for C<sub>14</sub>H<sub>7</sub>N<sub>3</sub>O<sub>3</sub> (M+Na<sup>+</sup>) 342.0776, found 342.0780.

***N*-2-[4-(Benzyloxy)-3-methoxyphenyl]-2-oxoethylmethanesulfonamide (2)**. 95% as light yellow needles, mp = 139-140 °C, R<sub>f</sub> = 0.28 (MeOH/CH<sub>2</sub>Cl<sub>2</sub>=1/50). <sup>1</sup>H NMR (CDCl<sub>3</sub>)  $\delta$ : 3.01 (s, 3H), 3.97 (s, 3H), 4.63 (s, 2H), 5.27 (s, 2H), 5.39 (bs, 1H), 6.96 (d, *J* = 8.4 Hz, 1H), 7.35-7.44 (m, 5H), 7.51 (dd, *J* = 1.8 Hz, *J* = 8.3 Hz, 1H), 7.53 (d, *J* = 1.7 Hz, 1H). <sup>13</sup>C NMR (CDCl<sub>3</sub>)  $\delta$ : 40.7, 49.8, 56.2, 70.9, 110.4, 112.4, 122.5, 127.3, 128.4, 128.8, 135.7, 150.0, 153.7, 191.7. HRMS *m/z* (ESI<sup>+</sup>) calc'd for C<sub>14</sub>H<sub>7</sub>N<sub>3</sub>O<sub>3</sub> (M+Na<sup>+</sup>) 372.0882, found 372.0876.

## General Procedure for the Synthesis of Pyrroles A<sub>1</sub>-A<sub>17</sub>.

To a stirred solution of N-aryl-, N-alkyl- or N-heteroarylsulfonamidoacetophenone (0.2 mmol), aldehyde (0.26 mmol) and malononitrile (0.26 mmol) in acetonitrile (3mL) was added Et<sub>3</sub>N (0.073 mmol). The mixture was refluxed until the starting sulfonamide disappeared (TLC). After this time the reaction mixture was cooled to room temperature and DDQ (0.6 mmol) was added under the nitrogen atmosphere (in the case of A<sub>16</sub> and A<sub>17</sub> the first part of the reaction was done in EtOH and after the disappearance of the starting sulfonamide the reaction mixture was cooled and before the adding of DDQ the solvent was changed to acetonitrile). The reaction mixture was stirred at room temperature for two hours. After that it was concentrated and purified by flash chromatography on silica gel with the indicated mixture of solvents to afford pure pyrroles.

**2-Amino-5-benzoyl-4-(4-chlorophenyl)-1-[(4-nitrophenyl)sulfonyl]-1H-pyrrole-3-carbonitrile (A<sub>1</sub>).** 81% as yellow solid, mp = 142-144 °C decomp., (CH<sub>2</sub>Cl<sub>2</sub>/EtOAc=10/1). <sup>1</sup>H NMR (DMSO-*d*<sub>6</sub>) δ: 7.18-7.31 (m, 6H), 7.34-7.62 (m, 3H), 7.83 (s, 2H), 8.24 (d, *J* = 8.8 Hz, 2H), 8.53 (d, *J* = 8.8 Hz, 2H). <sup>13</sup>C NMR (DMSO-*d*<sub>6</sub>) δ: 75.6, 114.9, 121.7, 125.5, 128.7, 129.0, 129.4, 131.5, 133.6, 134.1, 135.2, 138.2, 141.7, 151.7, 152.4, 185.5. HRMS *m/z* (ESI) calc'd for C<sub>24</sub>H<sub>16</sub>ClN<sub>4</sub>O<sub>5</sub>S (M+H<sup>+</sup>) 507.0530, found 507.0533.

**2-Amino-5-benzoyl-4-(3,4,5-trimethoxyphenyl)-1-[(2,4,6-triisopropylphenyl)sulfonyl]-1H-pyrrole-3-carbonitrile (A<sub>2</sub>).** 91% as brown solid, mp = 170-172 °C decomp., (CH<sub>2</sub>Cl<sub>2</sub>/EtOAc=10/1). <sup>1</sup>H NMR (DMSO-*d*<sub>6</sub>) δ: 1.01-1.08 (m, 18H), 2.72-2.81 (m, 1H), 3.45-3.84 (m, 11H), 6.29 (s, 2H), 7.07-7.30 (m, 8H). <sup>13</sup>C NMR (DMSO-*d*<sub>6</sub>) δ: 23.6, 24.9, 29.2, 33.9, 56.2, 60.4, 75.4, 107.4, 115.3, 122.6, 124.6, 126.1, 128.3, 129.1, 131.9, 132.9, 134.8, 138.0, 138.1, 151.5, 152.5, 152.7, 155.5, 184.3. HRMS *m/z* (ESI) calc'd for C<sub>36</sub>H<sub>42</sub>N<sub>3</sub>O<sub>6</sub>S (M+H<sup>+</sup>) 644.2794, found 644.2789.

**2-Amino-5-benzoyl-4-(3,4,5-trimethoxyphenyl)-1-[(4-methoxyphenyl)sulfonyl]-1H-pyrrole-3-carbonitrile (A<sub>3</sub>).** 89% as brown solid, mp = 156-158 °C decomp., (CH<sub>2</sub>Cl<sub>2</sub>/EtOAc=10/1). <sup>1</sup>H NMR (DMSO-*d*<sub>6</sub>) δ: 3.55-3.89 (m, 12H), 6.49 (s, 2H), 7.25-7.74 (m, 11H), 8.0 (d, *J* = 15 Hz, 2H). <sup>13</sup>C NMR (DMSO-*d*<sub>6</sub>) δ: 56.3, 56.7, 60.5, 74.9, 107.3, 115.5, 120.8, 126.0, 127.7, 129.0, 129.6, 130.9, 133.5, 133.9, 138.2, 138.7, 151.7, 152.8, 165.0, 186.5. HRMS *m/z* (ESI) calc'd for C<sub>28</sub>H<sub>26</sub>N<sub>3</sub>O<sub>7</sub>S (M+H<sup>+</sup>) 548.1491, found 548.1474.

**2-Amino-5-(4-methoxybenzoyl)-4-(3-bromo-4,5-dimethoxyphenyl)-1-[(4-methoxyphenyl)sulfonyl]-1H-pyrrole-3-carbonitrile (A<sub>4</sub>).** 78% as brown solid, mp = 138-140 °C, (CH<sub>2</sub>Cl<sub>2</sub>/EtOAc=10/1). <sup>1</sup>H NMR (DMSO-*d*<sub>6</sub>) δ: 3.61-3.85 (m, 12H), 6.84-7.62 (m, 10H), 7.93 (d, *J* = 5.5 Hz, 2H). <sup>13</sup>C NMR (DMSO-*d*<sub>6</sub>) δ: 56.1, 56.5, 56.6, 60.5, 74.4, 113.9, 114.3, 115.5, 116.8, 121.3, 125.0, 127.5, 128.0, 130.9, 131.4, 132.0, 146.2, 151.3, 153.1, 163.7, 165.1, 185.2. HRMS *m/z* (ESI) calc'd for C<sub>28</sub>H<sub>25</sub>BrN<sub>3</sub>O<sub>7</sub>S (M+H<sup>+</sup>) 626.0597, found 626.0576.

**2-Amino-5-benzoyl-4-(3-bromo-4-methoxyphenyl)-1-methanesulfonyl-1H-pyrrole-3-carbonitrile (A<sub>5</sub>).** 37% as brown solid, mp = 166-168 °C, (CH<sub>2</sub>Cl<sub>2</sub>/EtOAc=20/1). <sup>1</sup>H NMR (DMSO-*d*<sub>6</sub>) δ: 3.65 (s, 3H), 3.77 (s, 3H), 6.83-7.55 (m, 10H). <sup>13</sup>C NMR (DMSO-*d*<sub>6</sub>) δ: 43.5, 56.7, 74.6, 110.4, 112.5, 124.6, 128.5, 129.7, 130.2, 133.2, 134.0, 138.0, 152.5, 155.7, 185.6. HRMS *m/z* (ESI) calc'd for C<sub>20</sub>H<sub>17</sub>BrN<sub>3</sub>O<sub>4</sub>S (M+H<sup>+</sup>) 474.0123, found 474.0128.

**2-Amino-5-benzoyl-4-(3,5-dibromophenyl)-1-[(4-methoxyphenyl)sulfonyl]-1H-pyrrole-3-carbonitrile (A<sub>6</sub>).** 56% as brown solid, mp = 112-114 °C, (CH<sub>2</sub>Cl<sub>2</sub>/EtOAc=10/1). <sup>1</sup>H NMR (DMSO-*d*<sub>6</sub>) δ: 3.89 (s, 3H), 7.23-7.73 (m, 12H), 8.03 (s, 2H). <sup>13</sup>C NMR (DMSO-*d*<sub>6</sub>) δ: 56.7,

74.8, 115.6, 122.6, 127.4, 129.0, 129.5, 130.9, 131.5, 131.8, 133.7, 134.0, 134.6, 138.6, 151.8, 165.1, 185.9. HRMS  $m/z$  (ESI) calc'd for  $C_{25}H_{18}Br_2N_3O_4S$  (M+H<sup>+</sup>) 613.9385, found 613.9360.

**2-Amino-5-benzoyl-4-(5-bromo-3-pyridinyl)-1-[(4-methoxyphenyl)sulfonyl]-1H-pyrrole-3-carbonitrile (A<sub>7</sub>).** 41% as brown solid, mp = 90-92 °C, (CH<sub>2</sub>Cl<sub>2</sub>/EtOAc=10/1). <sup>1</sup>H NMR (DMSO-*d*<sub>6</sub>) δ: 3.89 (s, 3H), 7.24-7.76 (m, 10H), 8.39 (s, 1H), 8.57 (s, 1H). <sup>13</sup>C NMR (DMSO-*d*<sub>6</sub>) δ: 56.7, 75.0, 115.0, 115.6, 119.9, 122.5, 127.4, 128.7, 129.0, 129.6, 130.4, 131.0, 133.7, 138.5, 139.6, 148.3, 150.7, 152.0, 165.1, 185.5. HRMS  $m/z$  (ESI) calc'd for  $C_{24}H_{18}BrN_4O_4S$  (M+H<sup>+</sup>) 537.0232, found 537.0231.

**2-Amino-5-benzoyl-4-(2,6-dichlorophenyl)-1-[(4-methoxyphenyl)sulfonyl]-1H-pyrrole-3-carbonitrile (A<sub>8</sub>).** 78% as pink solid, mp = 180-181 °C decomp., (CH<sub>2</sub>Cl<sub>2</sub>/EtOAc=10/1). <sup>1</sup>H NMR (DMSO-*d*<sub>6</sub>) δ: 3.87 (s, 3H), 7.21-7.63 (m, 10H), 7.81-7.91 (m, 4H). <sup>13</sup>C NMR (DMSO-*d*<sub>6</sub>) δ: 56.7, 75.5, 114.2, 115.4, 123.9, 127.4, 128.5, 129.0, 129.6, 131.0, 131.9, 133.1, 133.5, 134.8, 138.4, 153.0, 165.1, 184.3. HRMS  $m/z$  (ESI) calc'd for  $C_{25}H_{17}Cl_2N_3O_4SNa$  (M+Na<sup>+</sup>) 548.0215, found 548.0224.

**2-Amino-5-benzoyl-4-(2,6-dichlorophenyl)-1-[(4-fluorophenyl)sulfonyl]-1H-pyrrole-3-carbonitrile (A<sub>9</sub>).** 55% as pink solid, mp = 166-168 °C, (CH<sub>2</sub>Cl<sub>2</sub>/EtOAc=10/1). <sup>1</sup>H NMR (DMSO-*d*<sub>6</sub>) δ: 7.21-7.67 (m, 10H), 7.93-8.07 (m, 4H). <sup>13</sup>C NMR (DMSO-*d*<sub>6</sub>) δ: 75.1, 114.0, 117.5, 117.8, 123.9, 128.5, 128.6, 129.0, 129.4, 131.7, 131.9, 132.0, 132.6, 133.2, 134.0, 134.7, 138.2, 153.2, 184.2. HRMS  $m/z$  (ESI) calc'd for  $C_{24}H_{14}Cl_2FN_3O_3SNa$  (M+Na<sup>+</sup>) 536.0015, found 536.0015.

**2-Amino-5-benzoyl-1-(butylsulfonyl)-4-(4-nitrophenyl)-1H-pyrrole-3-carbonitrile (A<sub>10</sub>).** 71% as brown solid, mp = 182-183 °C decomp., (CH<sub>2</sub>Cl<sub>2</sub>/EtOAc=50/1). <sup>1</sup>H NMR (DMSO-*d*<sub>6</sub>) δ: 0.82-0.96 (m, 3H), 1.36-1.45 (m, 2H), 1.74-1.98 (m, 2H), 3.94-4.07 (m, 2H), 7.14-7.62 (m, 9H), 7.94-8.01 (m, 2H). <sup>13</sup>C NMR (DMSO-*d*<sub>6</sub>) δ: 13.8, 21.2, 24.5, 55.6, 74.5, 115.2, 122.9, 123.5, 128.7, 130., 131.1, 132.9, 133.5, 137.8, 138.2, 147.4, 152.6, 185.6. HRMS  $m/z$  (ESI) calc'd for  $C_{22}H_{21}N_4O_5S$  (M+H<sup>+</sup>) 453.1233, found 453.1229.

**2-Amino-5-benzoyl-1-[(4-methylphenyl)sulfonyl]-4-propyl-1H-pyrrole-3-carbonitrile (A<sub>11</sub>).** 55% as brown solid, mp = 105-107 °C, (CH<sub>2</sub>Cl<sub>2</sub>/EtOAc=50/1). <sup>1</sup>H NMR (DMSO-*d*<sub>6</sub>) δ: 0.63 (t, J=12Hz, J=6Hz, 3H), 1.36-1.43 (q, J=6 Hz, J=9Hz, J=6Hz, 2H), 2.23-2.39 (m, 5H), 7.48-7.74 (m, 11H). <sup>13</sup>C NMR (DMSO-*d*<sub>6</sub>) δ: 13.7, 21.7, 22.9, 27.4, 75.8, 115.1, 122.3, 127.9, 129.0, 129.2, 130.5, 132.6, 133.0, 139.8, 140.0, 146.8, 152.9, 185.6. HRMS  $m/z$  (ESI) calc'd for  $C_{22}H_{22}N_3O_3S$  (M+H<sup>+</sup>) 408.1382, found 408.1375.

**2-Amino-5-benzoyl-1-(methylsulfonyl)-4-(2-thienyl)-1H-pyrrole-3-carbonitrile (A<sub>12</sub>).** 50% as brown solid, mp = 118-119 °C decomp., (CH<sub>2</sub>Cl<sub>2</sub>/EtOAc=50/1). <sup>1</sup>H NMR (DMSO-*d*<sub>6</sub>) δ: 3.73 (s, 3H), 6.79-6.90 (m, 2H), 7.23-7.61 (m, 8H). <sup>13</sup>C NMR (DMSO-*d*<sub>6</sub>) δ: 43.3, 74.2, 115.5, 122.0, 126.5, 127.7, 128.8, 129.4, 129.8, 130.9, 133.6, 138.0, 152.2, 185.2. HRMS  $m/z$  (ESI) calc'd for  $C_{17}H_{14}N_3O_3S_2$  (M+H<sup>+</sup>) 372.0477, found 372.0483.

**4-[5-Amino-2-benzoyl-4-cyano-1-(2-thienylsulfonyl)-1H-pyrrol-3-yl]benzenecarboxylate (A<sub>13</sub>).** 96% as brown solid, mp = 158-160 °C decomp., (CH<sub>2</sub>Cl<sub>2</sub>/EtOAc=20/1). <sup>1</sup>H NMR (DMSO-*d*<sub>6</sub>) δ: 3.73 (s, 3H), 7.26-7.77 (m, 12H), 7.98-7.99 (m, 1H), 8.21-8.22 (m, 1H). <sup>13</sup>C NMR (DMSO-*d*<sub>6</sub>) δ: 52.8, 75.1, 121.3, 128.7, 129.0, 129.4, 129.5, 129.9, 130.1, 133.6, 134.5, 134.8, 135.4, 136.9, 138.4, 139.0, 152.2, 166.1, 185.5. HRMS  $m/z$  (ESI) calc'd for  $C_{24}H_{18}N_3O_5S_2$  (M+H<sup>+</sup>) 492.0688, found 492.0689.

**2-Amino-5-benzoyl-4-(2-chloro-6-fluorophenyl)-1-(methylsulfonyl)-1H-pyrrole-3-carbonitrile (A<sub>14</sub>).** 88% as brown solid, mp = 140-142 °C, (CH<sub>2</sub>Cl<sub>2</sub>/EtOAc=20/1). <sup>1</sup>H NMR (DMSO-*d*<sub>6</sub>) δ: 3.96 (s, 3H), 6.93-7.34 (m, 6H), 7.48 (d, J=6 Hz, 2H), 7.84 (s, 2H). <sup>13</sup>C NMR



(DMSO-*d*<sub>6</sub>)  $\delta$ : 43.9, 74.7, 114.5, 114.6, 114.8, 124.6, 125.7, 128.0, 128.4, 129.0, 132.3, 133.4, 134.2, 137.6, 153.1, 184.7. HRMS *m/z* (ESI) calc'd for C<sub>19</sub>H<sub>14</sub>ClFN<sub>3</sub>O<sub>3</sub>S (M+H<sup>+</sup>) 418.0428, found 418.0424.

**2-Amino-5-benzoyl-4-(2,6-dichlorophenyl)-1-(methylsulfonyl)-1H-pyrrole-3-carbonitrile (A<sub>15</sub>).** 88% as brown solid, mp = 115-117 °C decomp., (CH<sub>2</sub>Cl<sub>2</sub>/EtOAc=20/1). <sup>1</sup>H NMR (DMSO-*d*<sub>6</sub>)  $\delta$ : 3.90 (s, 3H), 7.01-7.27 (m, 6H), 7.45 (d, J=6 Hz, 2H), 7.80 (s, 2H). <sup>13</sup>C NMR (DMSO-*d*<sub>6</sub>)  $\delta$ : 43.8, 74.3, 114.4, 124.5, 128.1, 128.4, 128.6, 129.8, 131.8, 132.4, 133.0, 134.7, 137.8, 153.2, 184.7. HRMS *m/z* (ESI) calc'd for C<sub>19</sub>H<sub>14</sub>Cl<sub>2</sub>N<sub>3</sub>O<sub>3</sub>S (M+H<sup>+</sup>) 434.0133, found 434.0125.

**2-Amino-5-benzoyl-4-(4-bromophenyl)-1-[(4-methoxyphenyl)sulfonyl]-1H-pyrrole-3-carboxamide (A<sub>16</sub>).** 38% as brown oil, (CH<sub>2</sub>Cl<sub>2</sub>/EtOAc=20/1). <sup>1</sup>H NMR (DMSO-*d*<sub>6</sub>)  $\delta$ : 3.84 (s, 3H), 7.08-7.92 (m, 16H). <sup>13</sup>C NMR (DMSO-*d*<sub>6</sub>)  $\delta$ : 56.6, 95.88, 115.4, 121.8, 122.6, 127.7, 128.9, 129.3, 130.5, 131.4, 131.8, 133.1, 139.3, 150.0, 164.9, 166.8, 186.7. HRMS *m/z* (ESI) calc'd for C<sub>25</sub>H<sub>21</sub>BrN<sub>3</sub>O<sub>5</sub>S (M+H<sup>+</sup>) 554.0385, found 554.0383.

**Ethyl 2-amino-5-benzoyl-1-[(4-methoxyphenyl)sulfonyl]-4-(3,4,5-trimethylphenyl)-1H-pyrrole-3-carboxylate (A<sub>17</sub>).** 76% as brown oil, (hexane/EtOAc=10/1). <sup>1</sup>H NMR (acetone-*d*<sub>6</sub>)  $\delta$ : 0.90 (t, J=9 Hz, J=6 Hz, 3H), 3.54-4.01 (m, 17H), 6.39 (s, 2H), 7.04-7.44 (m, 6H), 7.67 (d, J = 9 Hz, 2H), 7.80 (d, J=9 Hz, 1H), 8.06 (d, J=9 Hz, 2H). <sup>13</sup>C NMR (DMSO-*d*<sub>6</sub>)  $\delta$ : 14.1, 56.2, 56.6, 59.5, 60.3, 93.2, 108.5, 113.2, 114.5, 115.4, 122.1, 127.5, 128.2, 128.6, 129.5, 129.8, 130.7, 133.1, 133.5, 137.2, 138.9, 150.7, 151.8, 164.9, 165.1, 187.2. HRMS *m/z* (ESI) calc'd for C<sub>30</sub>H<sub>31</sub>N<sub>2</sub>O<sub>9</sub>S (M+H<sup>+</sup>) 595.1750, found 595.1769.

## General Procedure for the Synthesis of Pyrroles (B<sub>1</sub>-B<sub>5</sub>)

To a stirred solution of N-aryl- or N-alkylsulfonamidoacetophenone (0.2 mmol), aldehyde (0.26 mmol) and malononitrile (0.26 mmol) in acetonitrile (3 mL) was added Et<sub>3</sub>N (0.073 mmol). The mixture was refluxed until the starting sulfonamide disappeared (TLC). After that the reaction mixture was cooled to room temperature and co-evaporated three times with toluene to dryness. Then it was dissolved in DMF (1 mL) and to the stirred solution was added DBU (0.4 mmol) under the nitrogen atmosphere. The stirring was maintained at room temperature for 12 hours. After that the reaction mixture was concentrated and purified by flash chromatography on silica gel (CH<sub>2</sub>Cl<sub>2</sub>/EtOAc=4/1) to afford pure pyrroles.

**2-Amino-5-benzoyl-4-butyl-1H-pyrrole-3-carbonitrile (B<sub>1</sub>).** 43% as brown solid, mp = 128-130 °C, (CH<sub>2</sub>Cl<sub>2</sub>/EtOAc=5/1). <sup>1</sup>H NMR (DMSO-*d*<sub>6</sub>)  $\delta$ : 0.66 (t, J=6 Hz, 3H), 1.23-1.38 (m, 2H), 2.22 (t, J=6 Hz, J= 9Hz, 2H), 6.33 (s, 2H), 7.40-7.62 (m, 5H), 10.55 (s, 1H). <sup>13</sup>C NMR (DMSO-*d*<sub>6</sub>)  $\delta$ : 14.2, 23.9, 28.4, 77.7, 116.7, 121.2, 128.0, 128.9, 131.2, 138.2, 140.8, 150.7, 183.6. HRMS *m/z* (ESI) calc'd for C<sub>16</sub>H<sub>18</sub>N<sub>3</sub>O (M+H<sup>+</sup>) 254.1293, found 254.1280.

**2-Amino-5-benzoyl-4-(5-bromo-3-pyridinyl)-1H-pyrrole-3-carbonitrile (B<sub>2</sub>).** 80% as yellow solid, mp = 269-271 °C decomp., (CH<sub>2</sub>Cl<sub>2</sub>/EtOAc=5/1). <sup>1</sup>H NMR (DMSO-*d*<sub>6</sub>)  $\delta$ : 6.48 (s, 2H), 7.05-7.24 (m, 5H), 7.57 (s, 1H), 8.16 (s, 1H), 8.36 (s, 1H), 11.24 (s, 1H). <sup>13</sup>C NMR (DMSO-*d*<sub>6</sub>)  $\delta$ : 77.2, 116.3, 119.7, 121.8, 128.2, 129.0, 130.5, 131.0, 131.5, 138.7, 139.8, 148.7, 149.4, 151.1, 183.9. HRMS *m/z* (ESI) calc'd for C<sub>17</sub>H<sub>12</sub>BrN<sub>4</sub>O (M+H<sup>+</sup>) 367.0194, found 397.0199.

**2-Amino-5-benzoyl-4-(2,6-dichlorophenyl)-1H-pyrrole-3-carbonitrile (B<sub>3</sub>).** 70% as yellow solid, mp = 210-212 °C decomp., (CH<sub>2</sub>Cl<sub>2</sub>/EtOAc=5/1). <sup>1</sup>H NMR (DMSO-*d*<sub>6</sub>)  $\delta$ : 6.49 (s,

2H), 7.03-7.29 (m, 8H), 11.27 (s, 1H).  $^{13}\text{C}$  NMR (DMSO- $d_6$ )  $\delta$ : 77.3, 115.8, 121.6, 127.7, 128.4, 129.6, 131.1, 131.2, 131.7, 135.2, 138.7, 151.1, 183.8. HRMS  $m/z$  (ESI) calc'd for  $\text{C}_{18}\text{H}_{12}\text{Cl}_2\text{N}_3\text{O}$  (M+H $^+$ ) 356.0357, found 356.0363.

**2-Amino-5-benzoyl-4-(3,5-dibromophenyl)-1H-pyrrole-3-carbonitrile (B<sub>4</sub>).** 70% as yellow solid, mp = 278-280 °C decomp., (CH<sub>2</sub>Cl<sub>2</sub>/EtOAc=5/1).  $^1\text{H}$  NMR (DMSO- $d_6$ )  $\delta$ : 6.45 (s, 2H), 7.04-7.24 (m, 7H), 7.51 (s, 1H), 11.27 (s, 1H).  $^{13}\text{C}$  NMR (DMSO- $d_6$ )  $\delta$ : 76.9, 116.3, 121.5, 122.1, 128.1, 128.8, 131.4, 132.0, 132.5, 132.8, 137.0, 138.9, 151.0, 184.0. HRMS  $m/z$  (ESI) calc'd for  $\text{C}_{18}\text{H}_{11}\text{Br}_2\text{N}_3\text{ONa}$  (M+Na $^+$ ) 465.9167, found 465.9171.

**2-Amino-5-benzoyl-4-(3,4,5-trimethoxyphenyl)-1H-pyrrole-3-carbonitrile (B<sub>5</sub>).** 19-78% as yellow solid, mp = 245-247 °C decomp., (CH<sub>2</sub>Cl<sub>2</sub>/EtOAc=4/1).  $^1\text{H}$  NMR (DMSO- $d_6$ )  $\delta$ : 3.53 (s, 6H), 3.56 (s, 3H), 6.29 (s, 2H), 6.43 (s, 2H), 7.08-7.29 (m, 5H), 11.03 (s, 1H).  $^{13}\text{C}$  NMR (DMSO- $d_6$ )  $\delta$ : 56.2, 60.4, 77.1, 108.2, 116.7, 120.8, 127.8, 128.3, 129.0, 131.1, 136.3, 137.7, 139.3, 151.0, 152.6, 184.0. HRMS  $m/z$  (ESI) calc'd for  $\text{C}_{21}\text{H}_{20}\text{N}_3\text{O}_4$  (M+H $^+$ ) 378.1454, found 378.1463.

## General Procedure for the Synthesis of Pyrroles B<sub>5</sub>-B<sub>15</sub>.

To a stirred solution of N-methylsulfonamidoacetophenone (0.2 mmol), aldehyde (0.26 mmol) and a corresponding derivative of cyanoacetic acid (0.26 mmol) in EtOH (3 mL) were added 0.1 mmol of anhydrous granulated K<sub>2</sub>CO<sub>3</sub> in one portion. The mixture was refluxed for 14 hours. After this time reaction the mixture was cooled to room temperature and concentrated. The crude product was purified by flash chromatography on silica gel with the indicated mixture of solvents to afford pure pyrroles.

**2-Amino-5-benzoyl-4-(3,4,5-trimethoxyphenyl)-1H-pyrrole-3-carbonitrile (B<sub>5</sub>).** 80% as yellow solid, mp = 245-247 °C decomp., (CH<sub>2</sub>Cl<sub>2</sub>/EtOAc=5/1).  $^1\text{H}$  NMR (DMSO- $d_6$ )  $\delta$ : 3.53 (s, 6H), 3.56 (s, 3H), 6.29 (s, 2H), 6.43 (s, 2H), 7.08-7.29 (m, 5H), 11.03 (s, 1H).  $^{13}\text{C}$  NMR (DMSO- $d_6$ )  $\delta$ : 56.2, 60.4, 77.1, 108.2, 116.7, 120.8, 127.8, 128.3, 129.0, 131.1, 136.3, 137.7, 139.3, 151.0, 152.6, 184.0. HRMS  $m/z$  (ESI) calc'd for  $\text{C}_{21}\text{H}_{20}\text{N}_3\text{O}_4$  (M+H $^+$ ) 378.1454, found 378.1463.

**2-Amino-5-benzoyl-4-(2-chloro-6-fluorophenyl)-1H-pyrrole-3-carbonitrile (B<sub>6</sub>).** 88% as yellow solid, mp = 232-233 °C decomp., (CH<sub>2</sub>Cl<sub>2</sub>/EtOAc=5/1).  $^1\text{H}$  NMR (DMSO- $d_6$ )  $\delta$ : 6.43 (s, 2H), 6.85-7.20 (m, 8H), 11.26 (s, 1H).  $^{13}\text{C}$  NMR (DMSO- $d_6$ )  $\delta$ : 77.7, 114.2, 114.6, 115.8, 122.0, 125.2, 125.5, 127.7, 127.9, 131.3, 131.4, 131.5, 134.6, 138.5, 151.1, 183.8. HRMS  $m/z$  (ESI) calc'd for  $\text{C}_{19}\text{H}_{11}\text{ClFN}_3\text{OK}$  (M+K $^+$ ) 378.0212, found 378.0209.

**2-Amino-5-benzoyl-4-(4-methoxyphenyl)-1H-pyrrole-3-carbonitrile (B<sub>7</sub>).** 55% as brown solid, mp = 200-202 °C decomp., (CH<sub>2</sub>Cl<sub>2</sub>/EtOAc=4/1).  $^1\text{H}$  NMR (DMSO- $d_6$ )  $\delta$ : 3.61 (s, 6H), 6.36 (s, 2H), 6.59 (d, J=9 Hz, 2H), 6.88-7.21 (m, 8H), 10.92 (s, 1H).  $^{13}\text{C}$  NMR (DMSO- $d_6$ )  $\delta$ : 55.6, 77.1, 113.7, 120.7, 125.2, 127.9, 129.0, 130.9, 131.4, 136.0, 138.9, 151.0, 159.1, 184.1. HRMS  $m/z$  (ESI) calc'd for  $\text{C}_{19}\text{H}_{16}\text{N}_3\text{O}_2$  (M+H $^+$ ) 318.1243, found 318.1240.

**2-Amino-5-(4-methoxybenzoyl)-4-(3,4,5-trimethoxyphenyl)-1H-pyrrole-3-carbonitrile (B<sub>8</sub>).** 85% as yellow solid, mp = 238-240 °C decomp., (CH<sub>2</sub>Cl<sub>2</sub>/EtOAc=2/1).  $^1\text{H}$  NMR (acetone- $d_6$ )  $\delta$ : 3.60 (s, 6H), 3.63 (s, 3H), 3.71 (s, 3H), 6.03 (s, 2H), 6.38 (s, 2H), 6.64 (d, J=9 Hz, 2H), 7.36 (d, J=9 Hz, 2H), 10.34 (s, 1H).  $^{13}\text{C}$  NMR (acetone- $d_6$ )  $\delta$ : 54.9, 55.5, 59.7, 77.2, 108.0, 112.7,

115.7, 121.0, 128.2, 131.0, 131.4, 134.5, 138.2, 149.8, 153.0, 162.0, 183.1. HRMS  $m/z$  (ESI) calc'd for  $C_{22}H_{22}N_3O_5$  ( $M+H^+$ ) 408.1559, found 408.1568.

**2-Amino-5-benzoyl-4-(4-bromophenyl)-1H-pyrrole-3-carbonitrile (B<sub>9</sub>)**. 73% as yellow solid, mp = 297-299 °C decomp., ( $CH_2Cl_2/EtOAc=3/1$ ).  $^1H$  NMR (DMSO- $d_6$ )  $\delta$ : 6.43 (s, 2H), 6.94-7.26 (m, 9H), 11.08 (s, 1H).  $^{13}C$  NMR (DMSO- $d_6$ )  $\delta$ : 77.0, 116.6, 121.1, 121.4, 128.0, 129.1, 131.0, 131.1, 132.2, 132.4, 134.6, 138.8, 151.0, 184.0. HRMS  $m/z$  (ESI) calc'd for  $C_{18}H_{13}BrN_3O$  ( $M+H^+$ ) 366.0242, found 366.0230.

**[5-Amino-4-(4-methoxybenzoyl)-3-(4-methoxyphenyl)-1H-pyrrol-2-yl](4-methoxyphenyl) methanone (B<sub>10</sub>)**. 48% as yellow solid, mp = 213-214 °C decomp., ( $CH_2Cl_2/EtOAc=2/1$ ).  $^1H$  NMR (DMSO- $d_6$ )  $\delta$ : 3.52 (s, 6H), 3.60 (s, 3H), 3.63 (s, 3H), 6.24 (d,  $J=9$  Hz, 2H), 6.43-6.57 (m, 8H), 7.02 (d,  $J=9$  Hz, 2H), 7.12 (d,  $J=9$  Hz, 2H), 10.94 (s, 1H).  $^{13}C$  NMR (DMSO- $d_6$ )  $\delta$ : 55.6, 55.7, 106.6, 112.8, 112.9, 113.0, 121.6, 127.0, 130.6, 131.0, 131.7, 132.6, 133.0, 133.1, 150.9, 158.1, 160.9, 161.3, 184.6, 191.6. HRMS  $m/z$  (ESI) calc'd for  $C_{27}H_{25}N_2O_5$  ( $M+H^+$ ) 457.1763, found 457.1755.

**[5-Amino-3-(4-nitrophenyl)-4-(phenylsulfonyl)-1H-pyrrol-2-yl](phenyl)methanone (B<sub>11</sub>)**. 28% as yellow solid, mp = 176-178 °C decomp., ( $CH_2Cl_2/EtOAc=4/1$ ).  $^1H$  NMR (DMSO- $d_6$ )  $\delta$ : 6.25 (s, 2H), 6.87-7.07 (m, 7H), 7.32-7.46 (m, 5H), 7.70 (d,  $J=9$  Hz, 2H), 11.35 (s, 1H).  $^{13}C$  NMR (DMSO- $d_6$ )  $\delta$ : 102.4, 121.9, 122.8, 126.1, 127.8, 128.6, 129.6, 130.1, 130.8, 133.0, 133.2, 138.7, 140.1, 144.0, 146.7, 147.6, 184.8. HRMS  $m/z$  (ESI) calc'd for  $C_{23}H_{18}N_3O_5S$  ( $M+H^+$ ) 448.0967, found 448.0964.

**[5-Amino-3-(4-bromophenyl)-4-(phenylsulfonyl)-1H-pyrrol-2-yl](phenyl)methanone (B<sub>12</sub>)**. 40% as yellow solid, mp = 272-273 °C decomp., ( $CH_2Cl_2/EtOAc=4/1$ ).  $^1H$  NMR (DMSO- $d_6$ )  $\delta$ : 6.15 (s, 2H), 6.67 (d,  $J=6$  Hz, 2H), 6.96-7.49 (m, 13H), 11.19 (s, 1H).  $^{13}C$  NMR (DMSO- $d_6$ )  $\delta$ : 102.3, 122.7, 126.1, 127.8, 128.6, 129.4, 129.9, 130.6, 131.4, 131.7, 133.1, 133.6, 138.8, 144.2, 147.4, 185.0. HRMS  $m/z$  (ESI) calc'd for  $C_{23}H_{18}BrN_2O_3S$  ( $M+H^+$ ) 448.0222, found 448.0214.

**[5-Amino-3-(3,4,5-trimethoxyphenyl)-4-(phenylsulfonyl)-1H-pyrrol-2-yl](phenyl)methanone (B<sub>13</sub>)**. 52% as yellow solid, mp = 212-213 °C decomp., ( $CH_2Cl_2/EtOAc=4/1$ ).  $^1H$  NMR (acetone- $d_6$ )  $\delta$ : 3.54 (s, 6H), 3.63 (s, 3H), 6.11 (s, 2H), 6.27 (s, 2H), 7.01-7.49 (m, 10H), 10.44 (s, 1H).  $^{13}C$  NMR (acetone- $d_6$ )  $\delta$ : 43.5, 56.20, 60.38, 103.5, 110.6, 123.3, 127.2, 127.9, 128.9, 129.3, 131.0, 133.0, 133.6, 138.9, 140.0, 145.1, 147.7, 152.9, 185.6. HRMS  $m/z$  (ESI) calc'd for  $C_{26}H_{25}N_2O_6S$  ( $M+H^+$ ) 493.1433, found 493.1437.

**Ethyl 2-amino-5-benzoyl-1-[(4-methoxyphenyl)sulfonyl]-4-(3,4,5-trimethoxyphenyl)-1H-pyrrole-3-carboxylate (B<sub>14</sub>)**. 57% as yellow solid, mp = 161-163 °C decomp., ( $CH_2Cl_2/EtOAc=4/1$ ).  $^1H$  NMR (DMSO- $d_6$ )  $\delta$ : 0.91 (t,  $J=9$  Hz,  $J=6$  Hz, 3H), 3.48 (s, 3H), 3.50 (s, 6H), 3.92 (q,  $J=9$  Hz,  $J=6$  Hz,  $J=6$  Hz, 2H), 6.17 (s, 2H), 6.19 (s, 2H), 6.97-7.15 (m, 5H), 10.87 (s, 1H).  $^{13}C$  NMR (DMSO- $d_6$ )  $\delta$ : 14.5, 56.1, 58.9, 60.2, 96.3, 109.4, 122.2, 127.4, 128.4, 130.2, 134.8, 136.9, 139.9, 150.3, 151.7, 165.4, 185.0. HRMS  $m/z$  (ESI) calc'd for  $C_{23}H_{24}N_2O_6Na$  ( $M+Na^+$ ) 447.1532, found 447.1516.

**2-Amino-5-benzoyl-4-(2,6-dichlorophenyl)-1H-pyrrole-3-carboxamide (B<sub>15</sub>)**. 48% as white solid, mp = 224-226 °C decomp., ( $CH_2Cl_2/EtOAc=2/1$ ).  $^1H$  NMR (DMSO- $d_6$ )  $\delta$ : 6.38 (s, 2H), 7.05-7.28 (m, 10H), 11.09 (s, 1H).  $^{13}C$  NMR (DMSO- $d_6$ )  $\delta$ : 98.8, 120.7, 125.9, 127.1, 127.7, 128.7, 130.4, 131.3, 133.0, 135.7, 139.8, 150.3, 167.2, 184.0. HRMS  $m/z$  (ESI) calc'd for  $C_{18}H_{14}Cl_2N_3O_2$  ( $M+H^+$ ) 374.0463, found 374.0465.

## General Procedure for the Synthesis of Pyrroles B<sub>16</sub>-B<sub>21</sub>.

To a solution of **1** or **2** (0.676 mmol), selected aldehyde (0.879 mmol) and cyanoacetamide (0.072 g, 0.879 mmol) in EtOH was added anhydrous granulated K<sub>2</sub>CO<sub>3</sub> (0.052g, 0.372 mmol) in one portion. The mixture was purged with nitrogen for 5 min, and then refluxed for 14 hours under the nitrogen atmosphere. After this time the reaction mixture was cooled to room temperature, the formed precipitate was collected by filtration and washed on the filter with EtOH (2 mL) and diethyl ether. The mother liquor was evaporated and the residue subjected to column chromatography with MeOH/CH<sub>2</sub>Cl<sub>2</sub>=1/70 to 1/50 gradient.

**2-Amino-5-benzoyl-4-[4-(methoxy)phenyl]-1H-pyrrole-3-carboxamide (B<sub>16</sub>)**. 93% as yellow solid, mp = 256-257 °C decomp., (MeOH/CH<sub>2</sub>Cl<sub>2</sub>=3/47). <sup>1</sup>H NMR (DMSO-*d*<sub>6</sub>) δ: 3.66 (s, 3H), 6.37 (bs, 2H), 6.65 (d, *J* = 8.6 Hz, 2H), 6.93 (d, *J* = 8.6 Hz, 2H), 6.99 (t, *J* = 7.7 Hz, *J* = 15.3 Hz, 1H), 7.10 (d, *J* = 8.6 Hz, 2H), 7.16 (t, *J* = 7.6 Hz, *J* = 15.4 Hz, 2H), 10.84 (bs, 1H). <sup>13</sup>C NMR (DMSO-*d*<sub>6</sub>) δ: 55.5, 99.5, 114.0, 121.9, 126.4, 127.6, 128.3, 132.2, 139.7, 149.7, 159.0, 167.7, 184.3. HRMS *m/z* (ESI<sup>+</sup>) calc'd for C<sub>14</sub>H<sub>7</sub>N<sub>3</sub>O<sub>3</sub> (M+H<sup>+</sup>) 336.1348, found 336.1348.

**2-Amino-5-(4-methoxybenzoyl)-4-(4-methoxyphenyl)-1H-pyrrole-3-carboxamide (B<sub>17</sub>)**. 89% as yellow solid, mp = 260-262 °C decomp., (MeOH/CH<sub>2</sub>Cl<sub>2</sub>=3/47). <sup>1</sup>H NMR (DMSO-*d*<sub>6</sub>) δ: 3.66 (s, 3H), 3.68 (s, 3H), 6.33 (bs, 2H), 6.54 (d, *J* = 8.4 Hz, 2H), 6.70 (d, *J* = 8.3 Hz, 2H), 6.94 (d, *J* = 8.3 Hz, 2H), 7.10 (d, *J* = 8.4 Hz, 2H), 10.80 (bs, 1H). <sup>13</sup>C NMR (DMSO-*d*<sub>6</sub>) δ: 55.6, 99.1, 113.0, 114.1, 121.9, 126.7, 130.4, 131.7, 132.0, 132.3, 149.6, 159.2, 160.8, 167.9, 183.6. HRMS *m/z* (ESI<sup>+</sup>) calc'd for C<sub>14</sub>H<sub>7</sub>N<sub>3</sub>O<sub>3</sub> (M+H<sup>+</sup>) 366.1454, found 366.1445.

**2-Amino-5-[4-(benzyloxy)benzoyl]-4-[4-(benzyloxy)phenyl]-1H-pyrrole-3-carboxamide (B<sub>18</sub>)**. 83% as yellow solid, mp = 234-235 °C decomp., (MeOH/CH<sub>2</sub>Cl<sub>2</sub>=1/50). <sup>1</sup>H NMR (DMSO-*d*<sub>6</sub>) δ: 5.02 (s, 4H), 6.35 (bs, 2H), 6.64 (d, *J* = 6.3 Hz, 2H), 6.77 (d, *J* = 8.0 Hz, 2H), 6.96 (d, *J* = 6.6 Hz, 2H), 7.10 (d, *J* = 6.6 Hz, 2H), 7.35 (m, 10H), 10.79 (bs, 1H). <sup>13</sup>C NMR (DMSO-*d*<sub>6</sub>) δ: 69.3, 69.4, 98.5, 113.2, 114.3, 121.3, 126.4, 127.4, 127.5, 127.7, 127.8, 128.3, 129.8, 131.2, 131.7, 131.8, 136.6, 136.8, 149.0, 157.9, 159.4, 167.3, 183.0. HRMS *m/z* (ESI<sup>+</sup>) calc'd for C<sub>14</sub>H<sub>7</sub>N<sub>3</sub>O<sub>3</sub> (M+Na<sup>+</sup>) 540.1899, found 540.1898.

**2-Amino-5-[4-(benzyloxy)-3-methoxybenzoyl]-4-[4-(benzyloxy)phenyl]-1H-pyrrole-3-carboxamide (B<sub>19</sub>)**. 86% as yellow solid, mp = 208-209 °C decomp., (MeOH/CH<sub>2</sub>Cl<sub>2</sub>=1/50). <sup>1</sup>H NMR (DMSO-*d*<sub>6</sub>) δ: 3.62 (s, 3H), 4.98 (s, 2H), 4.99 (s, 2H) 6.34 (bs, 2H), 6.71 (d, *J* = 1.7 Hz, 1H), 6.76 (m, 4H), 7.00 (d, *J* = 6.3 Hz, 2H), 7.34 (m, 10H), 10.86 (bs, 1H). <sup>13</sup>C NMR (DMSO-*d*<sub>6</sub>) δ: 55.2, 69.5, 70.1, 98.5, 111.6, 112.2, 114.2, 121.2, 121.4, 126.4, 127.6, 127.8, 128.3, 128.4, 131.3, 131.6, 132.4, 136.8, 136.8, 147.6, 149.1, 149.2, 157.8, 167.3, 183.1. HRMS *m/z* (ESI<sup>+</sup>) calc'd for C<sub>14</sub>H<sub>7</sub>N<sub>3</sub>O<sub>3</sub> (M+Na<sup>+</sup>) 570.2005, found 570.2007.

**2-Amino-5-[4-(benzyloxy)benzoyl]-4-[4-(benzyloxy)-3-methoxyphenyl]-1H-pyrrole-3-carboxamide (B<sub>20</sub>)**. 86% as yellow solid, mp = 190-191 °C decomp., (MeOH/CH<sub>2</sub>Cl<sub>2</sub>=1/50). <sup>1</sup>H NMR (DMSO-*d*<sub>6</sub>) δ: 3.53 (s, 3H), 4.99 (s, 2H), 5.01 (s, 2H), 6.36 (bs, 2H), 6.51 (s, 1H), 6.61 (d, *J* = 8.3 Hz, 2H), 6.70 (d, *J* = 7.8 Hz, 1H), 6.89 (d, *J* = 8.2 Hz, 1H), 7.13 (d, *J* = 8.3 Hz, 2H), 7.34 (m, 10H), 10.83 (bs, 1H). <sup>13</sup>C NMR (DMSO-*d*<sub>6</sub>) δ: 55.8, 69.9, 70.7 98.9, 113.6, 113.9, 115.4, 121.8, 123.3, 127.5, 128.0, 128.1, 128.2, 128.3, 128.8, 128.9, 130.2, 131.9, 132.6, 137.5, 148.0, 149.1, 149.6, 160.0, 167.8, 183.6. HRMS *m/z* (ESI<sup>+</sup>) calc'd for C<sub>14</sub>H<sub>7</sub>N<sub>3</sub>O<sub>3</sub> (M+H<sup>+</sup>) 548.2185, found 548.2172.

**2-Amino-5-[4-(benzyloxy)-3-methoxybenzoyl]-4-[4-(benzyloxy)-3-methoxyphenyl]-1H-pyrrole-3-carboxamide (B<sub>21</sub>)**. Mixture of 2 mL of dioxane and 4 mL of ethanol was used as a

chromatography solvent. 84% as yellow solid, mp = 188-190 °C decomp., (MeOH/CH<sub>2</sub>Cl<sub>2</sub>=1/50). <sup>1</sup>H NMR (DMSO-*d*<sub>6</sub>) δ: 3.53 (s, 3H), 3.61 (s, 3H), 4.95 (s, 2H), 4.98 (s, 2H), 6.35 (bs, 2H), 6.53 (s, 1H), 6.54-6.80 (m, 5H), 6.89 (d, *J* = 8.2 Hz, 2H), 7.34 (m, 10H), 10.83 (bs, 1H). <sup>13</sup>C NMR (DMSO-*d*<sub>6</sub>) δ: 55.6, 55.7, 70.8, 70.9, 98.9, 111.9, 112.8, 113.9, 115.2, 121.7, 121.8, 123.1, 128.1, 128.2, 128.3, 128.7, 128.8, 132.0, 133.3, 137.3, 137.5, 147.9, 148.1, 148.9, 149.6, 149.7, 167.8, 183.7. HRMS *m/z* (ESI<sup>+</sup>) calc'd for C<sub>14</sub>H<sub>7</sub>N<sub>3</sub>O<sub>3</sub> (M+H<sup>+</sup>) 578.2291, found 578.2289.

## General Procedure for the Synthesis of Protected Rigidins C<sub>1</sub>-C<sub>4</sub>.

A selected pyrrolocarboxamide **B<sub>18</sub>-B<sub>21</sub>** (0.3478 mmol) was co-evaporated with toluene (5 mL) and dissolved in diglyme (3 mL, extra dry grade). Nitrogen was bubbled through the mixture for 5 min, and 0.20 mL (0.3825 mmol) of oxalyl chloride (2M in CH<sub>2</sub>Cl<sub>2</sub>) were added dropwise during an intense stirring of the mixture. After the addition the mixture was heated at 130 °C for 1h and then 110 °C for 5h under the atmosphere of nitrogen. After that time the solvent was evaporated under reduced pressure and 5 mL of 50% MeOH in CH<sub>2</sub>Cl<sub>2</sub> were added to the solid in the flask. The formed precipitate was filtered off, rinsed with 2 mL of MeOH followed by 5 mL of diethyl ether. The mother liquor was evaporated and the residue was chromatographed on silica gel using 30/1 to 30/5 of CH<sub>2</sub>Cl<sub>2</sub>/MeOH gradient.

**6-[4-(Benzyloxy)benzoyl]-5-[4-(benzyloxy)phenyl]-1H-pyrrolo[2,3-*d*]pyrimidine-2,4(3*H*,7*H*)-dione (C<sub>1</sub>).** 81% as a brown powder, mp > 300 °C decomp., (MeOH/CH<sub>2</sub>Cl<sub>2</sub>=4/30). <sup>1</sup>H NMR (DMSO-*d*<sub>6</sub>) δ: 5.02 (s, 2H), 5.06 (s, 2H), 6.69 (d, *J* = 8.8 Hz, 2H), 6.74 (d, *J* = 8.8 Hz, 2H), 7.07 (d, *J* = 8.7 Hz, 2H), 7.29-7.40 (m, 12H), 10.71 (bs, 1H), 11.31 (bs, 1H), 11.94 (bs, 1H). <sup>13</sup>C NMR (DMSO-*d*<sub>6</sub>) δ: 69.8, 70.0, 98.9, 113.8, 114.3, 128.0, 128.1, 128.3, 128.5, 128.9, 129.0, 131.7, 132.8, 136.8, 137.6, 151.3, 158.1, 160.3, 161.2, 185.7. HRMS *m/z* (ESI<sup>+</sup>) calc'd for C<sub>14</sub>H<sub>7</sub>N<sub>3</sub>O<sub>3</sub> (M-H<sup>+</sup>) 542.1721, found 542.1714.

**6-[4-(Benzyloxy)-3-methoxybenzoyl]-5-[4-(benzyloxy)phenyl]-1H-pyrrolo[2,3-*d*]pyrimidine-2,4(3*H*,7*H*)-dione (C<sub>2</sub>).** 74% as a brown powder, mp > 300 °C decomp., (MeOH/CH<sub>2</sub>Cl<sub>2</sub>=4/30). <sup>1</sup>H NMR (DMSO-*d*<sub>6</sub>) δ: 3.57 (s, 3H), 5.01 (s, 2H), 5.05 (s, 2H), 6.72 (s, 1H), 6.87-7.10 (m, 7H), 7.37 (m, 10H), 10.72 (bs, 1H), 11.27 (bs, 1H), 11.94 (bs, 1H). <sup>13</sup>C NMR (DMSO-*d*<sub>6</sub>) δ: 56.3, 70.3, 71.2, 99.1, 114.0, 114.1, 123.5, 125.4, 125.6, 127.9, 128.0, 128.2, 128.3, 128.9, 131.9, 132.8, 137.4, 137.8, 142.0, 149.2, 150.9, 151.7, 158.5, 160.1, 185.7. HRMS *m/z* (ESI<sup>+</sup>) calc'd for C<sub>14</sub>H<sub>7</sub>N<sub>3</sub>O<sub>3</sub> (M+Na<sup>+</sup>) 596.1798, found 596.1792.

**6-[4-(Benzyloxy)benzoyl]-5-[4-(benzyloxy)-3-methoxyphenyl]-1H-pyrrolo[2,3-*d*]pyrimidine-2,4(3*H*,7*H*)-dione (C<sub>3</sub>).** 76% as a yellow powder, mp > 300 °C decomp., (MeOH/CH<sub>2</sub>Cl<sub>2</sub>=4/30). <sup>1</sup>H NMR (DMSO-*d*<sub>6</sub>) δ: 3.60 (s, 3H), 4.97 (s, 2H), 5.03 (s, 2H), 6.66-6.74 (m, 5H), 7.34-7.38 (m, 12H), 10.70 (bs, 1H), 11.48 (bs, 1H), 11.96 (bs, 1H). <sup>13</sup>C NMR (DMSO-*d*<sub>6</sub>) δ: 55.9, 70.0, 70.6, 98.9, 113.1, 114.2, 116.2, 124.4, 125.5, 125.8, 128.1, 128.3, 128.5, 128.9, 129.0, 129.1, 131.2, 131.6, 137.0, 137.7, 151.3, 160.3, 161.5, 185.8. HRMS *m/z* (ESI<sup>+</sup>) calc'd for C<sub>14</sub>H<sub>7</sub>N<sub>3</sub>O<sub>3</sub> (M+Na<sup>+</sup>) 596.1798, found 596.1804.

**6-[4-(Benzyloxy)-3-methoxybenzoyl]-5-[4-(benzyloxy)-3-(methoxy)phenyl]-1H-pyrrolo[2,3-*d*]pyrimidine-2,4(3*H*,7*H*)-dione (C<sub>4</sub>).** 72% as a yellow powder, mp > 300 °C decomp., (MeOH/CH<sub>2</sub>Cl<sub>2</sub>=4/30). <sup>1</sup>H NMR (DMSO-*d*<sub>6</sub>) δ: 3.52 (s, 3H), 3.55 (s, 3H), 4.98 (s, 2H), 5.04 (s, 2H), 6.74 (s, 1H), 6.78 (s, 1H), 6.88 (d, *J* = 8.4 Hz, 1H), 6.93 (d, *J* = 1.5 Hz, 1H), 7.10

(dd,  $J = 1.6$  Hz,  $J = 8.3$  Hz, 1H), 7.31-7.39 (m, 10H), 10.73 (bs, 1H), 11.27 (bs, 1H), 11.96 (bs, 1H).  $^{13}\text{C}$  NMR (DMSO- $d_6$ )  $\delta$ : 55.6, 55.7, 70.5, 70.7, 98.8, 112.7, 113.2, 123.3, 124.3, 125.5, 125.6, 128.0, 128.1, 128.2, 128.4, 128.8, 128.9, 131.4, 137.0, 137.6, 141.9, 147.7, 148.1, 148.3, 151.1, 151.2, 160.2, 185.7. HRMS  $m/z$  (ESI $^+$ ) calc'd for  $\text{C}_{14}\text{H}_7\text{N}_3\text{O}_3$  (M+Na $^+$ ) 626.1903, found 626.1908.

## Synthesis of Rigidins A, B, C and D.

A selected protected rigidin **C**<sub>1</sub>-**C**<sub>4</sub> (0.0735 mmol) and Pd/C (20 mg, 10%) were suspended in DMF (0.3 mL) and MeOH (1 mL). The suspension was degassed three times by the freeze-pump-thaw method at -196 °C and then stirred under a hydrogen balloon for 3h. After that time the solvent was lyophilized, the crude residue was dissolved in MeOH/CH<sub>2</sub>Cl<sub>2</sub> and subjected to silica gel column chromatography (MeOH/CH<sub>2</sub>Cl<sub>2</sub>/AcOH=10/50/1) to afford pure alkaloids.

**6-(4-Hydroxybenzoyl)-5-(4-hydroxyphenyl)-1H-pyrrolo[2,3-*d*]pyrimidine-2,4(3*H*,7*H*)-dione (Rigidin A).** 94.7% (0.0254 g) as yellow solid, mp > 300 °C decomp., (CH<sub>2</sub>Cl<sub>2</sub>/MeOH/AcOH = 50/10/1,  $R_f = 0.43$ ).  $^1\text{H}$  NMR (DMSO- $d_6$ )  $\delta$ : 6.46 (d,  $J = 8.5$  Hz, 2H), 6.47 (d,  $J = 8.6$  Hz, 2H), 6.94 (d,  $J = 8.5$  Hz, 2H), 7.29 (d,  $J = 8.6$  Hz, 2H), 9.28 (bs, 1H), 10.02 (bs, 1H), 10.63 (bs, 1H), 11.32 (bs, 1H), 11.84 (bs, 1H).  $^{13}\text{C}$  NMR (CD<sub>3</sub>OD)  $\delta$ : 98.5, 113.6, 114.1, 123.9, 128.5, 129.3, 131.5, 132.3, 156.0, 160.2, 160.8, 162.9, 185.4. HRMS  $m/z$  (ESI $^+$ ) calc'd for  $\text{C}_{14}\text{H}_7\text{N}_3\text{O}_3$  (M+Na $^+$ ) 386.0753, found 386.0742.

**6-(4-Hydroxy-3-methoxybenzoyl)-5-(4-hydroxyphenyl)-1H-pyrrolo[2,3-*d*]pyrimidine-2,4(3*H*,7*H*)-dione (Rigidin B).** 95% as brown solid, mp > 300 °C decomp., (CH<sub>2</sub>Cl<sub>2</sub>/MeOH/AcOH = 50/10/1,  $R_f = 0.41$ ).  $^1\text{H}$  NMR (DMSO- $d_6$ )  $\delta$ : 3.56 (s, 3H), 6.47 (d,  $J = 8.5$  Hz, 2H), 6.57 (d,  $J = 8.2$  Hz, 1H), 6.93 (d,  $J = 1.6$  Hz, 1H), 6.99-7.01 (m, 3H), 9.30 (bs, 1H), 10.54 (bs, 1H), 11.99 (bs, 1H).  $^{13}\text{C}$  NMR (DMSO- $d_6$ )  $\delta$ : 55.7, 98.8, 113.7, 114.3, 115.0, 123.6, 124.2, 125.3, 128.8, 129.6, 133.0, 147.0, 150.7, 152.7, 156.9, 160.7, 185.8. HRMS  $m/z$  (ESI $^+$ ) calc'd for  $\text{C}_{14}\text{H}_7\text{N}_3\text{O}_3$  (M+H $^+$ ) 394.1039, found 394.1032.

**6-(4-Hydroxybenzoyl)-5-(4-hydroxy-3-methoxyphenyl)-1H-pyrrolo[2,3-*d*]pyrimidine-2,4(3*H*,7*H*)-dione (Rigidin C).** 96% as dark yellow solid, mp > 300 °C decomp., (CH<sub>2</sub>Cl<sub>2</sub>/MeOH/AcOH = 50/10/1,  $R_f = 0.41$ ).  $^1\text{H}$  NMR (DMSO- $d_6$ )  $\delta$ : 3.58 (s, 3H), 6.53 (m, 3H), 6.69-6.76 (m, 2H), 7.33 (d,  $J = 8.5$  Hz, 2H), 8.69 (bs, 1H), 9.66 (bs, 1H), 10.21 (bs, 1H).  $^{13}\text{C}$  NMR (DMSO- $d_6$ )  $\delta$ : 56.2, 98.7, 114.8, 115.6, 116.4, 123.5, 125.5, 129.3, 131.7, 132.1, 135.4, 141.8, 147.1, 148.1, 151.1, 161.1, 185.7. HRMS  $m/z$  (ESI $^+$ ) calc'd for  $\text{C}_{14}\text{H}_7\text{N}_3\text{O}_3$  (M+H $^+$ ) 394.1039, found 394.1028.

**6-(4-Hydroxy-3-methoxybenzoyl)-5-(4-hydroxy-3-methoxyphenyl)-1H-pyrrolo[2,3-*d*]pyrimidine-2,4(3*H*,7*H*)-dione (Rigidin D).** 93% as maroon solid, mp > 300 °C decomp., (CH<sub>2</sub>Cl<sub>2</sub>/MeOH/AcOH = 50/10/1,  $R_f = 0.38$ ).  $^1\text{H}$  NMR (DMSO- $d_6$ )  $\delta$ : 3.52 (s, 3H), 3.54 (s, 3H), 6.49 (d,  $J = 8.1$  Hz, 1H), 6.58 (d,  $J = 8.2$  Hz, 1H), 6.66 (dd,  $J = 1.7$  Hz,  $J = 8.1$  Hz, 1H), 6.73 (d,  $J = 1.6$  Hz, 1H), 6.93 (d,  $J = 1.6$  Hz, 1H), 7.05 (dd,  $J = 1.6$  Hz,  $J = 8.2$  Hz, 1H), 8.89 (bs, 1H), 9.65 (bs, 1H), 10.60 (bs, 1H), 11.83 (bs, 1H).  $^{13}\text{C}$  NMR (DMSO- $d_6$ )  $\delta$ : 55.8, 55.8, 98.8, 113.7, 114.7, 116.5, 123.7, 124.0, 124.8, 125.3, 128.8, 129.7, 146.3, 146.6, 146.9, 150.8, 160.6, 185.8. HRMS  $m/z$  (ESI $^+$ ) calc'd for  $\text{C}_{14}\text{H}_7\text{N}_3\text{O}_3$  (M+Na $^+$ ) 446.0964, found 446.0964.

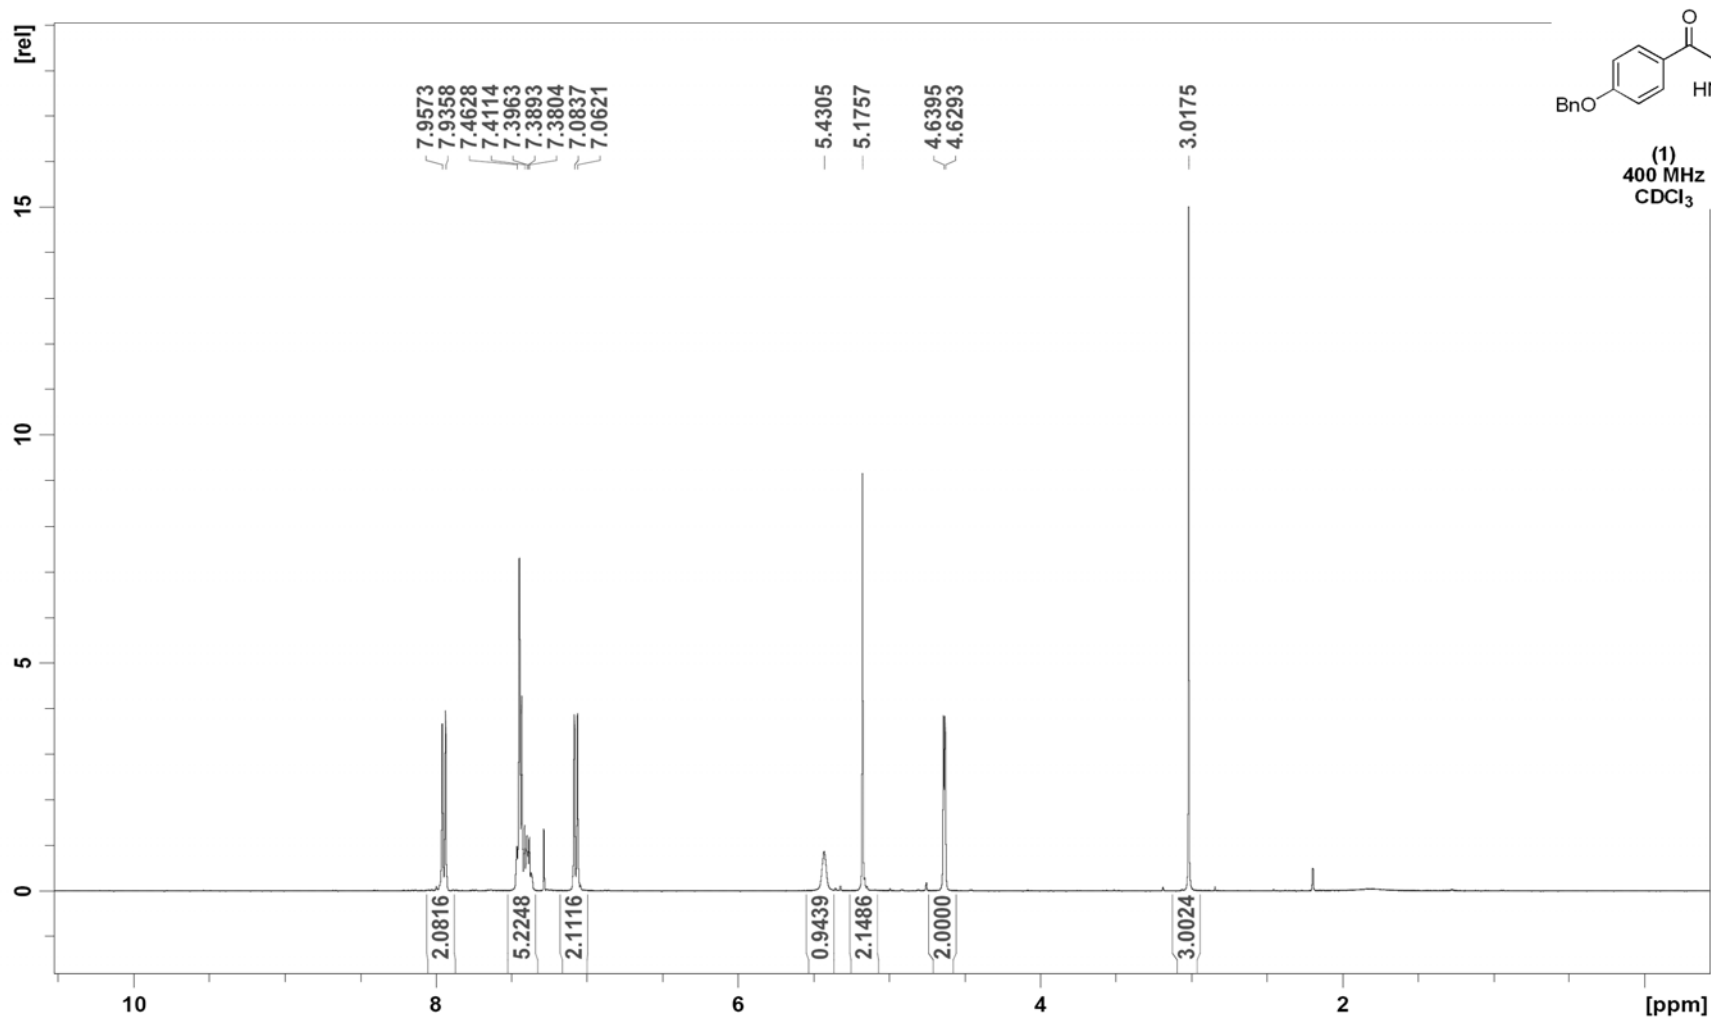

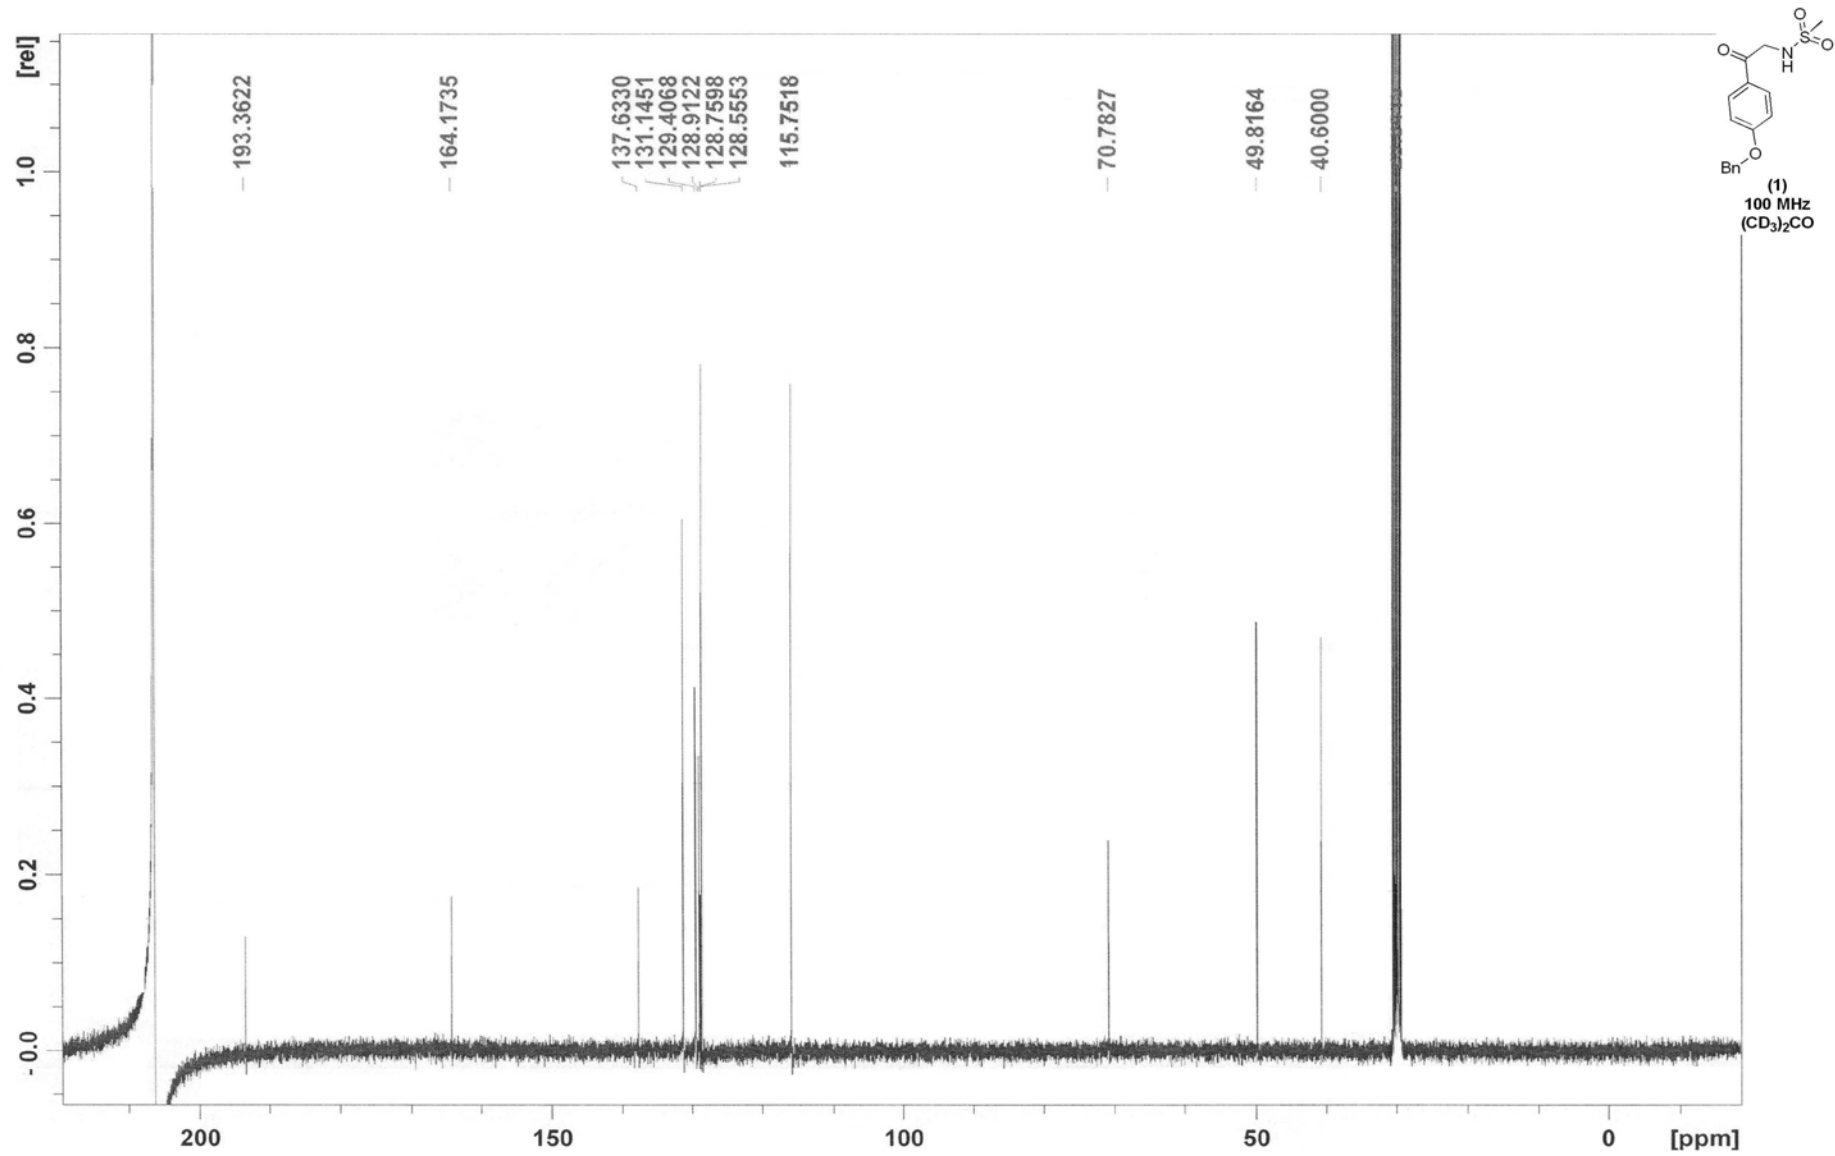



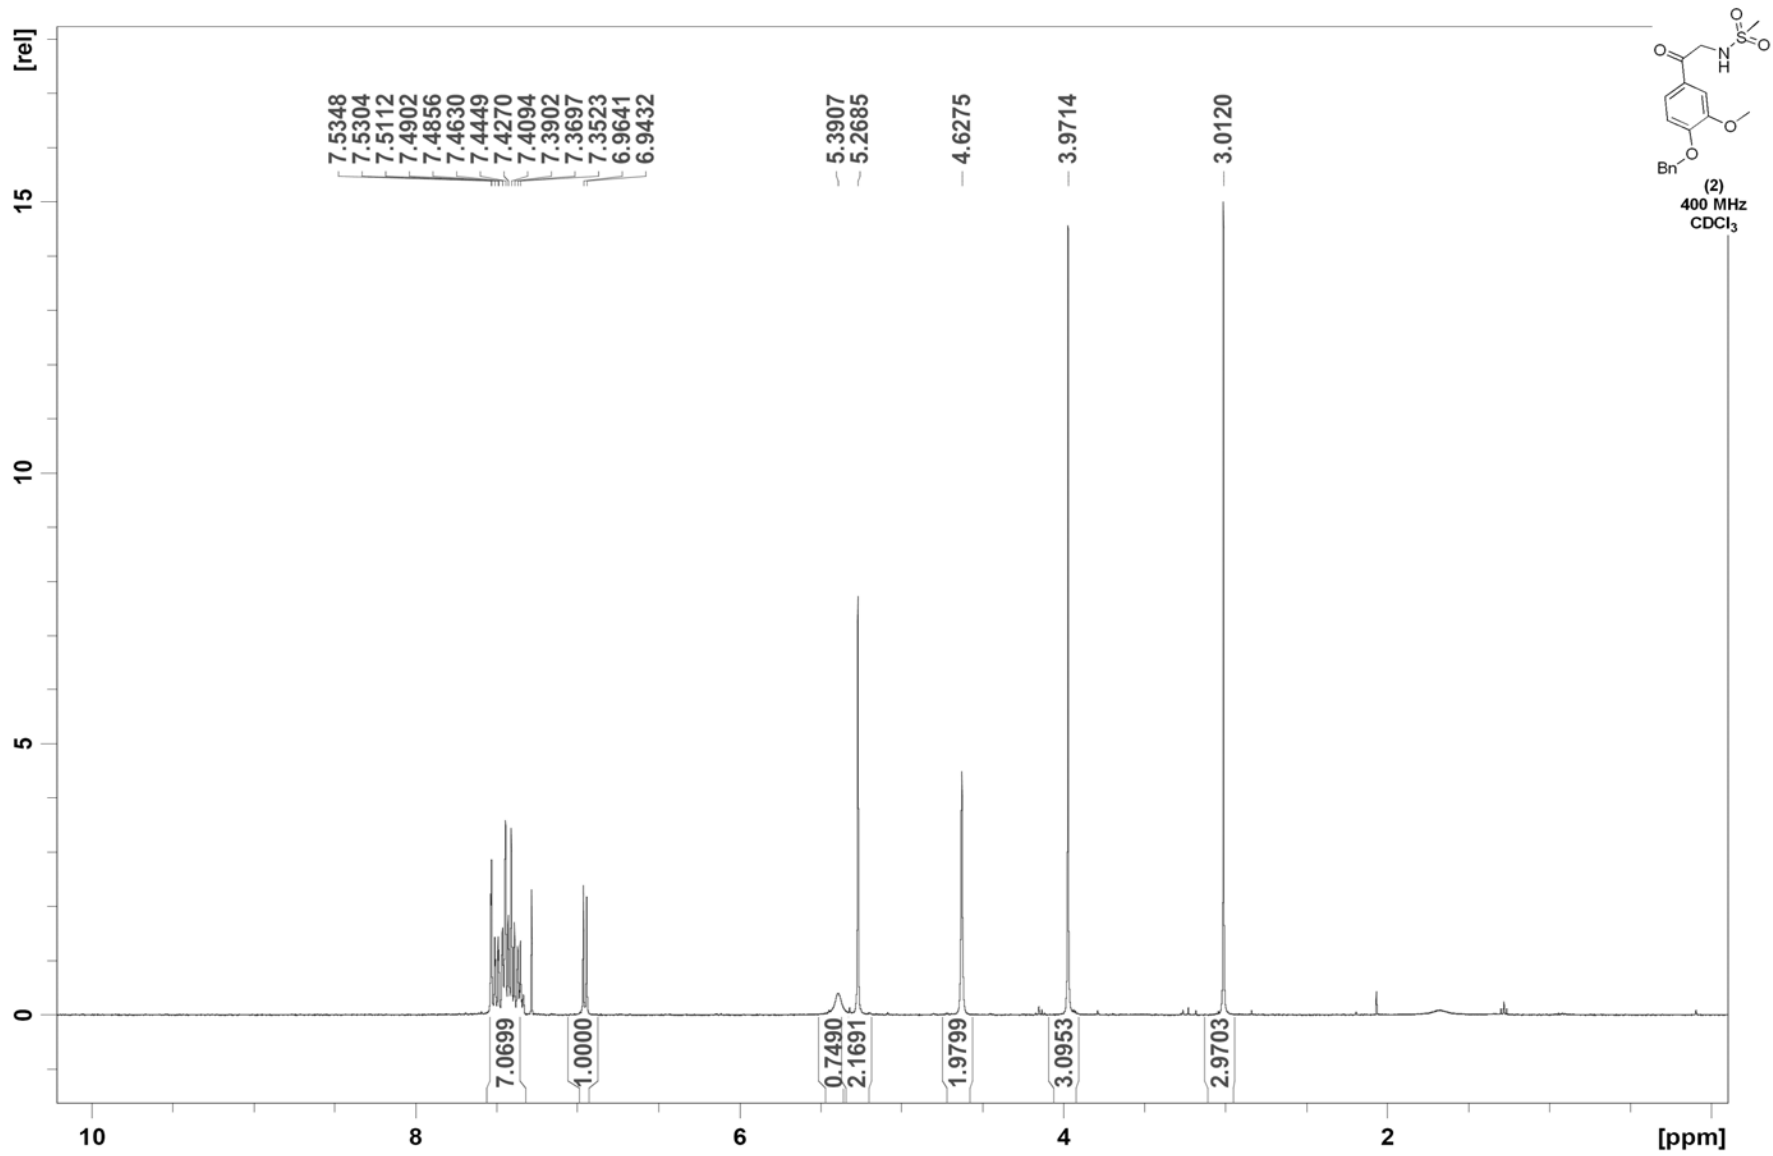

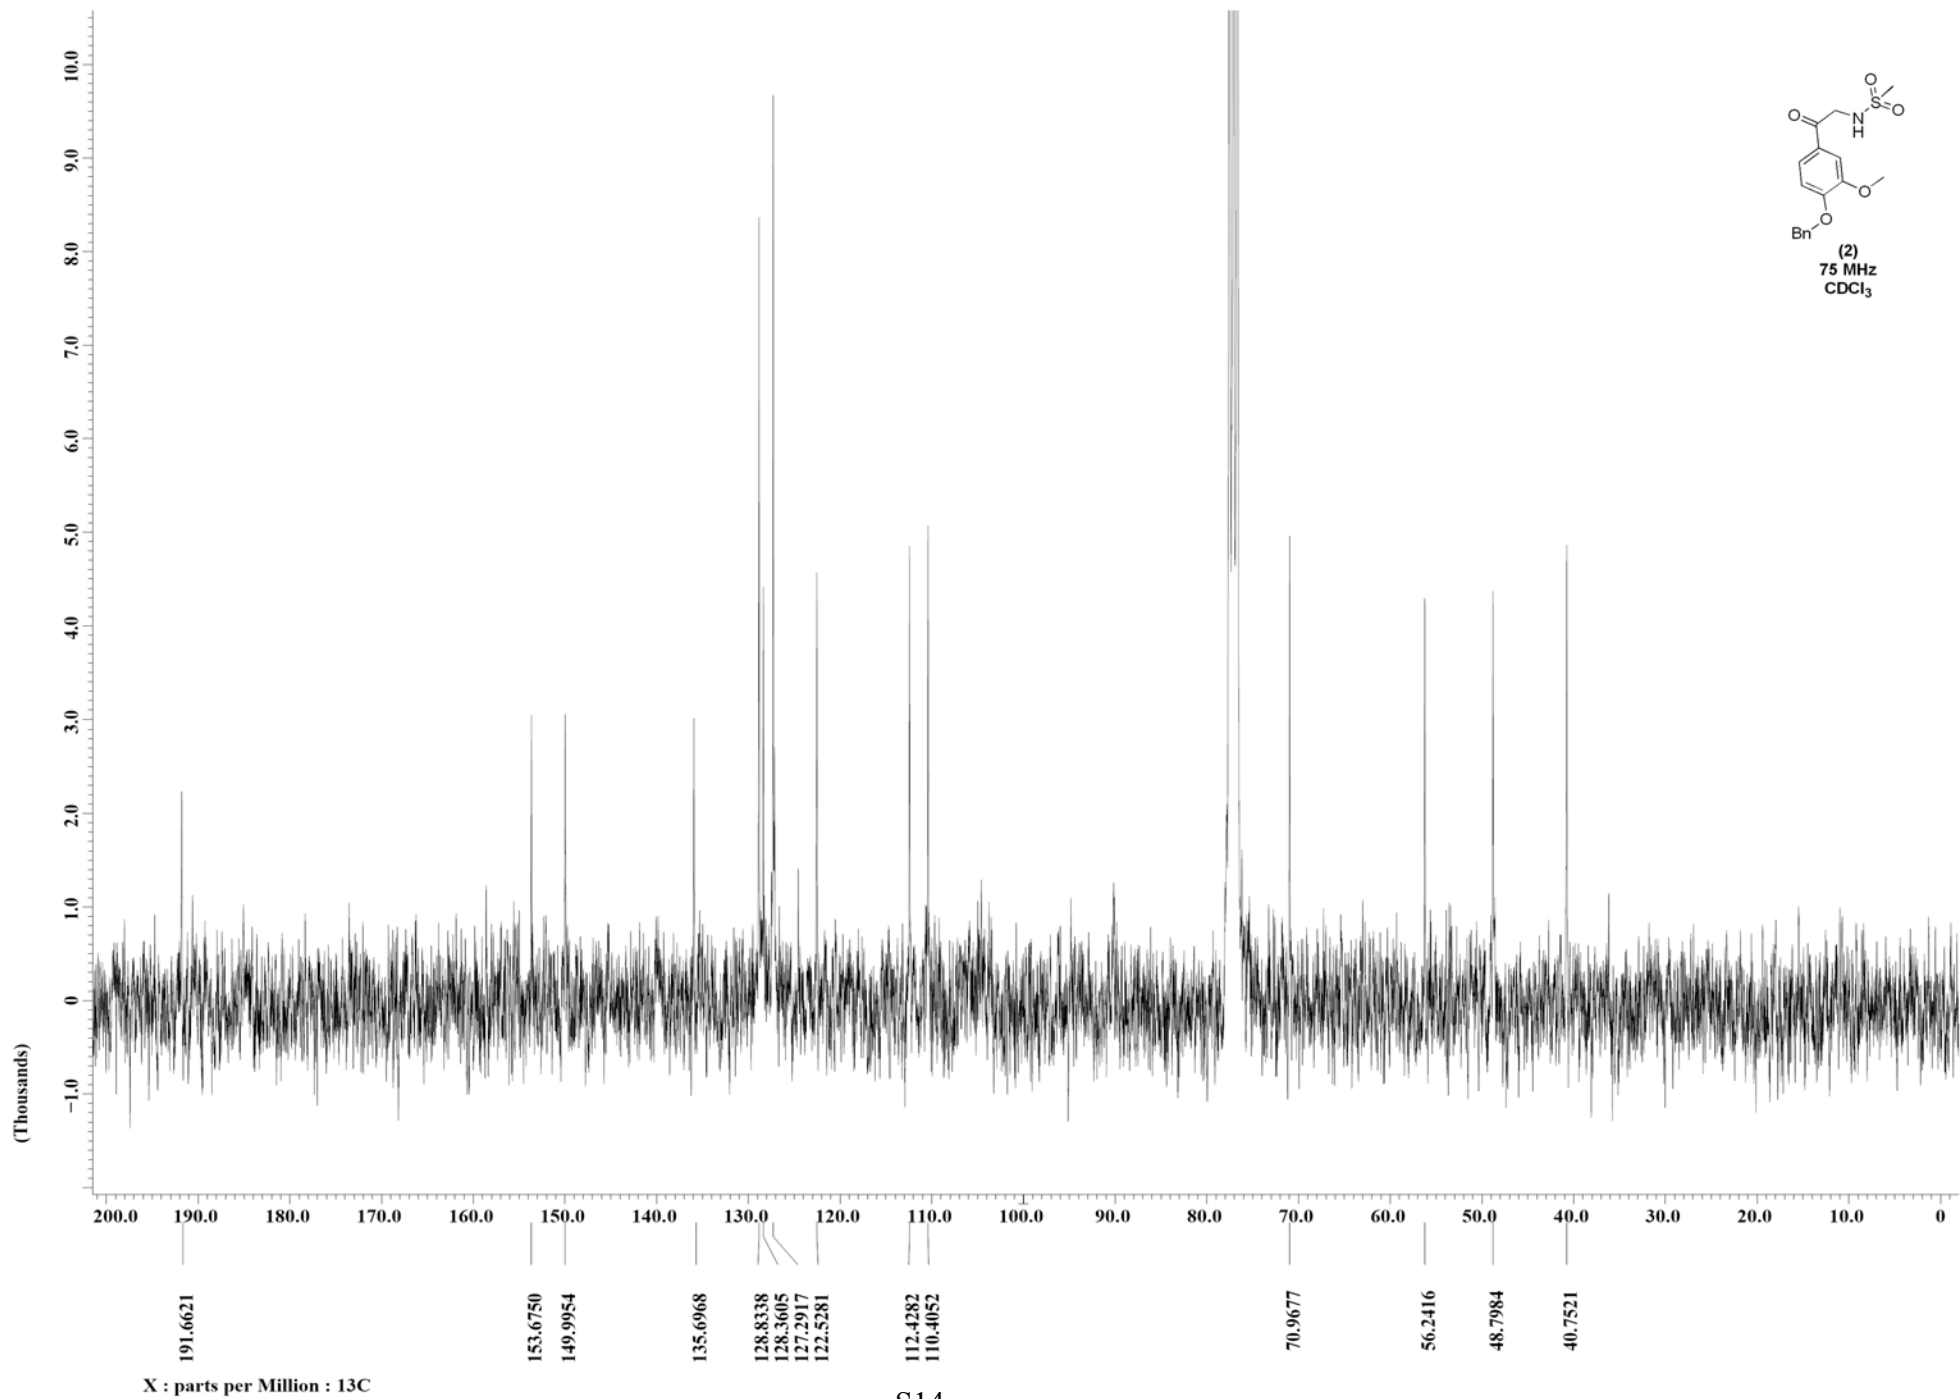

S14

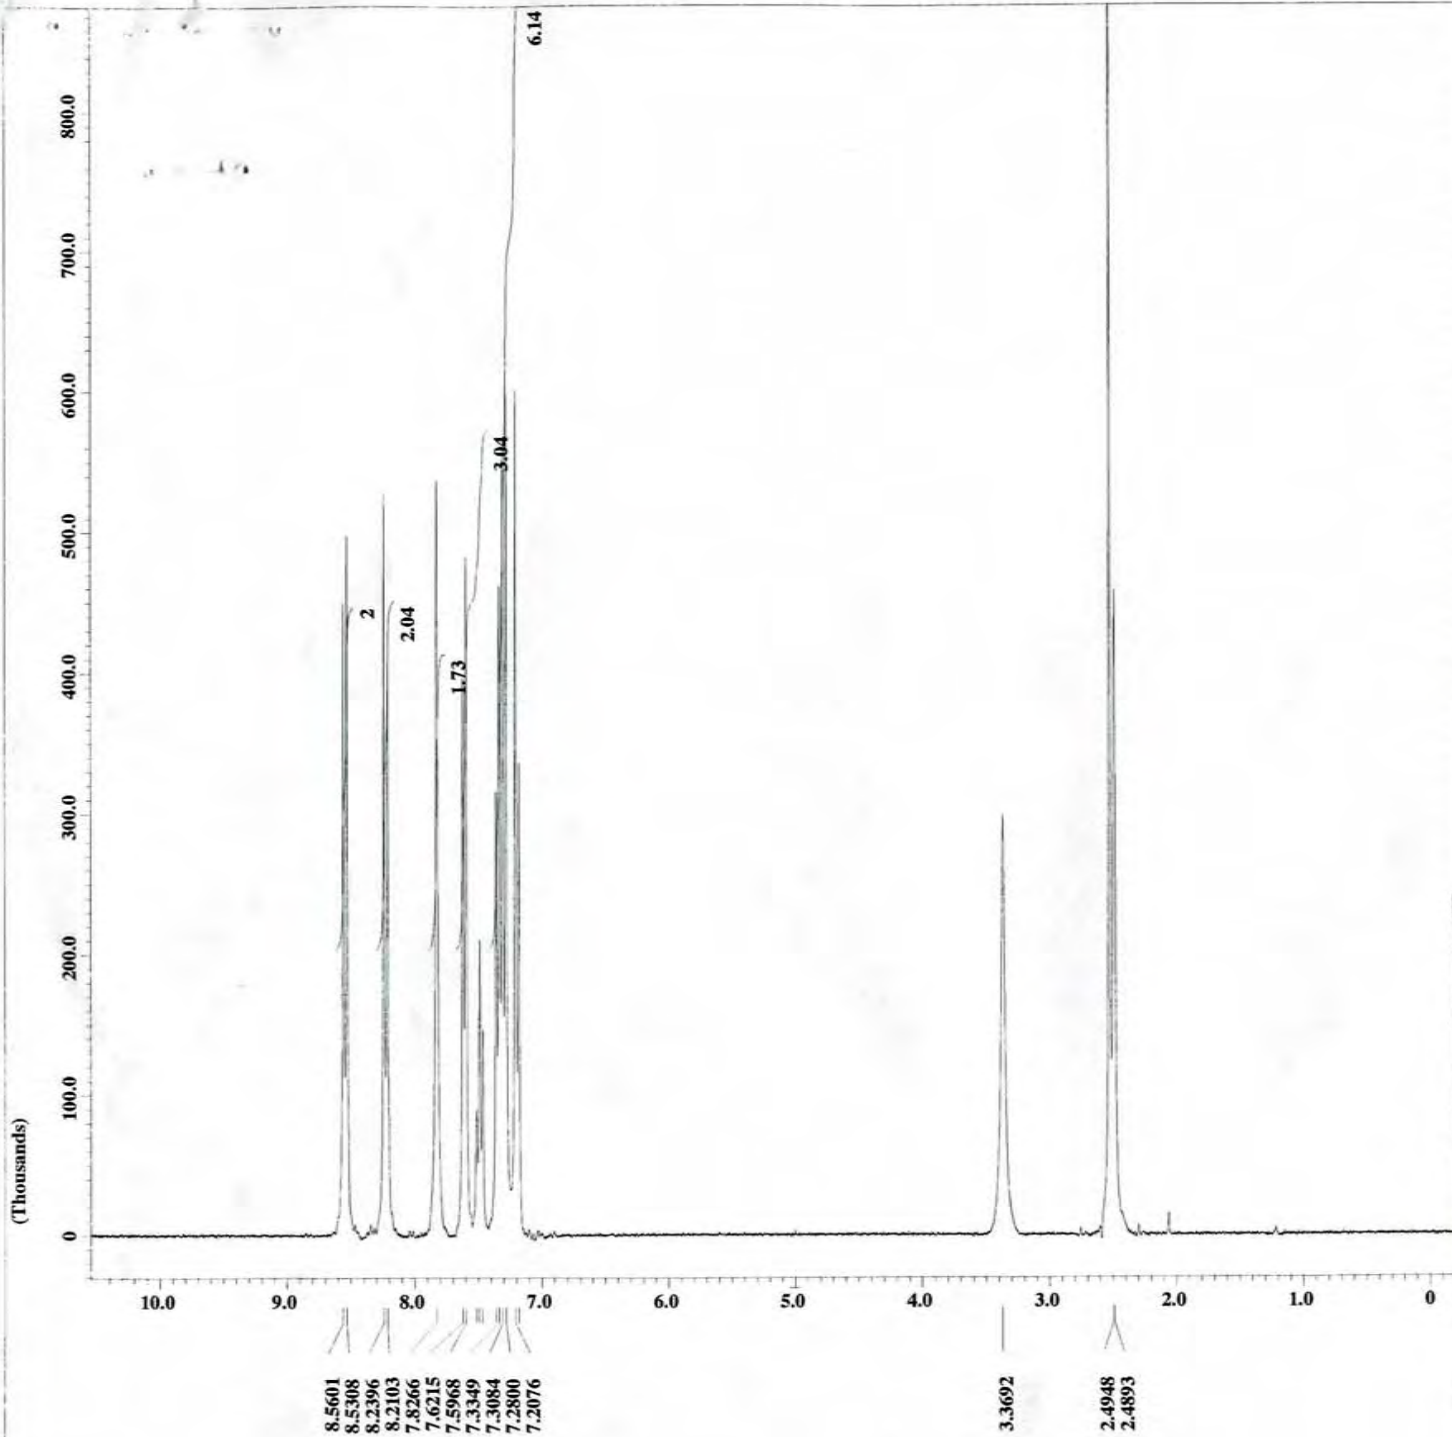

X : parts per Million : 1H

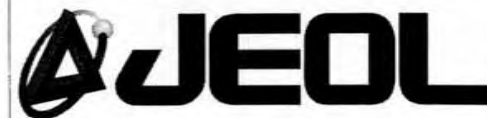

Filename = 1d\_spectrum-157.jdf  
 Author = alex  
 Experiment = single\_pulse.exp  
 Sample\_id = S#411015  
 Solvent = DMSO-D6  
 Creation\_time = 12-DEC-2010 11:18:33  
 Revision\_time = 12-DEC-2010 16:25:17  
 Current\_time = 12-DEC-2010 16:25:25

Comment = Single Pulse Experime  
 Data\_format = 1D REAL  
 Dim\_size = 16384  
 Dim\_title = 1H  
 Dim\_units = [ppm]  
 Dimensions = X  
 Site = Eclipse+ 300  
 Spectrometer = DELTA\_NMR

Field\_strength = 7.0586013[T] (300[MHz])  
 X\_acq\_duration = 3.6339712[s]  
 X\_domain = 1H  
 X\_freq = 300.52965592[MHz]  
 X\_offset = 5[ppm]  
 X\_points = 16384  
 X\_prescans = 0  
 X\_resolution = 0.27518105[Hz]  
 X\_sweep = 4.50856628[kHz]  
 Clipped = FALSE  
 Mod\_return = 1  
 Scans = 8  
 Total\_scans = 8

X\_90\_width = 16[us]  
 X\_acq\_time = 3.6339712[s]  
 X\_angle = 45[deg]  
 X\_pulse = 8[us]  
 Initial\_wait = 1[s]  
 Phase\_preset = 3[us]  
 Recvr\_gain = 15

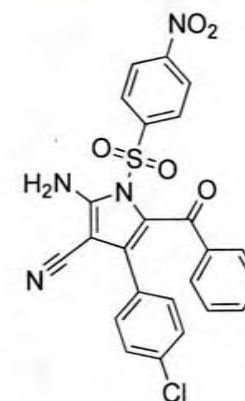

A<sub>1</sub>  
 300 MHz, DMSO-d<sub>6</sub>

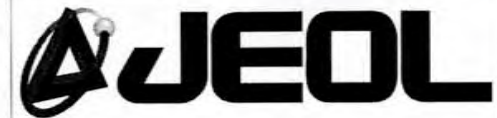

Filename = ld\_13c\_spectrum-92.jd  
Author = alex  
Experiment = single\_pulse\_dec  
Sample\_id = S#412896  
Solvent = DMSO-D6  
Creation\_time = 12-DEC-2010 12:52:00  
Revision\_time = 12-DEC-2010 16:18:47  
Current\_time = 12-DEC-2010 16:18:51

Comment = Single Pulse with Bro  
Data\_format = 1D\_COMPLEX  
Dim\_size = 32768  
Dim\_title = 13C  
Dim\_units = [ppm]  
Dimensions = X  
Site = Eclipse+ 300  
Spectrometer = DELTA\_NMR

Field\_strength = 7.0586013[T] (300[MHz])  
X\_acq\_duration = 1.7334272[s]  
X\_domain = 13C  
X\_freq = 75.56823426[MHz]  
X\_offset = 100[ppm]  
X\_points = 32768  
X\_prescans = 4  
X\_resolution = 0.57689184[Hz]  
X\_sweep = 18.90359168[kHz]  
Irr\_domain = 1H  
Irr\_freq = 300.52965592[MHz]  
Irr\_offset = 5[ppm]  
Clipped = FALSE  
Mod\_return = 1  
Scans = 2000  
Total\_scans = 2000

X\_90\_width = 8.1[us]  
X\_acq\_time = 1.7334272[s]  
X\_angle = 30[deg]  
X\_pulse = 2.7[us]  
Initial\_wait = 1[s]  
Phase\_preset = 3[us]  
Recvr\_gain = 15  
Relaxation\_delay = 1[s]

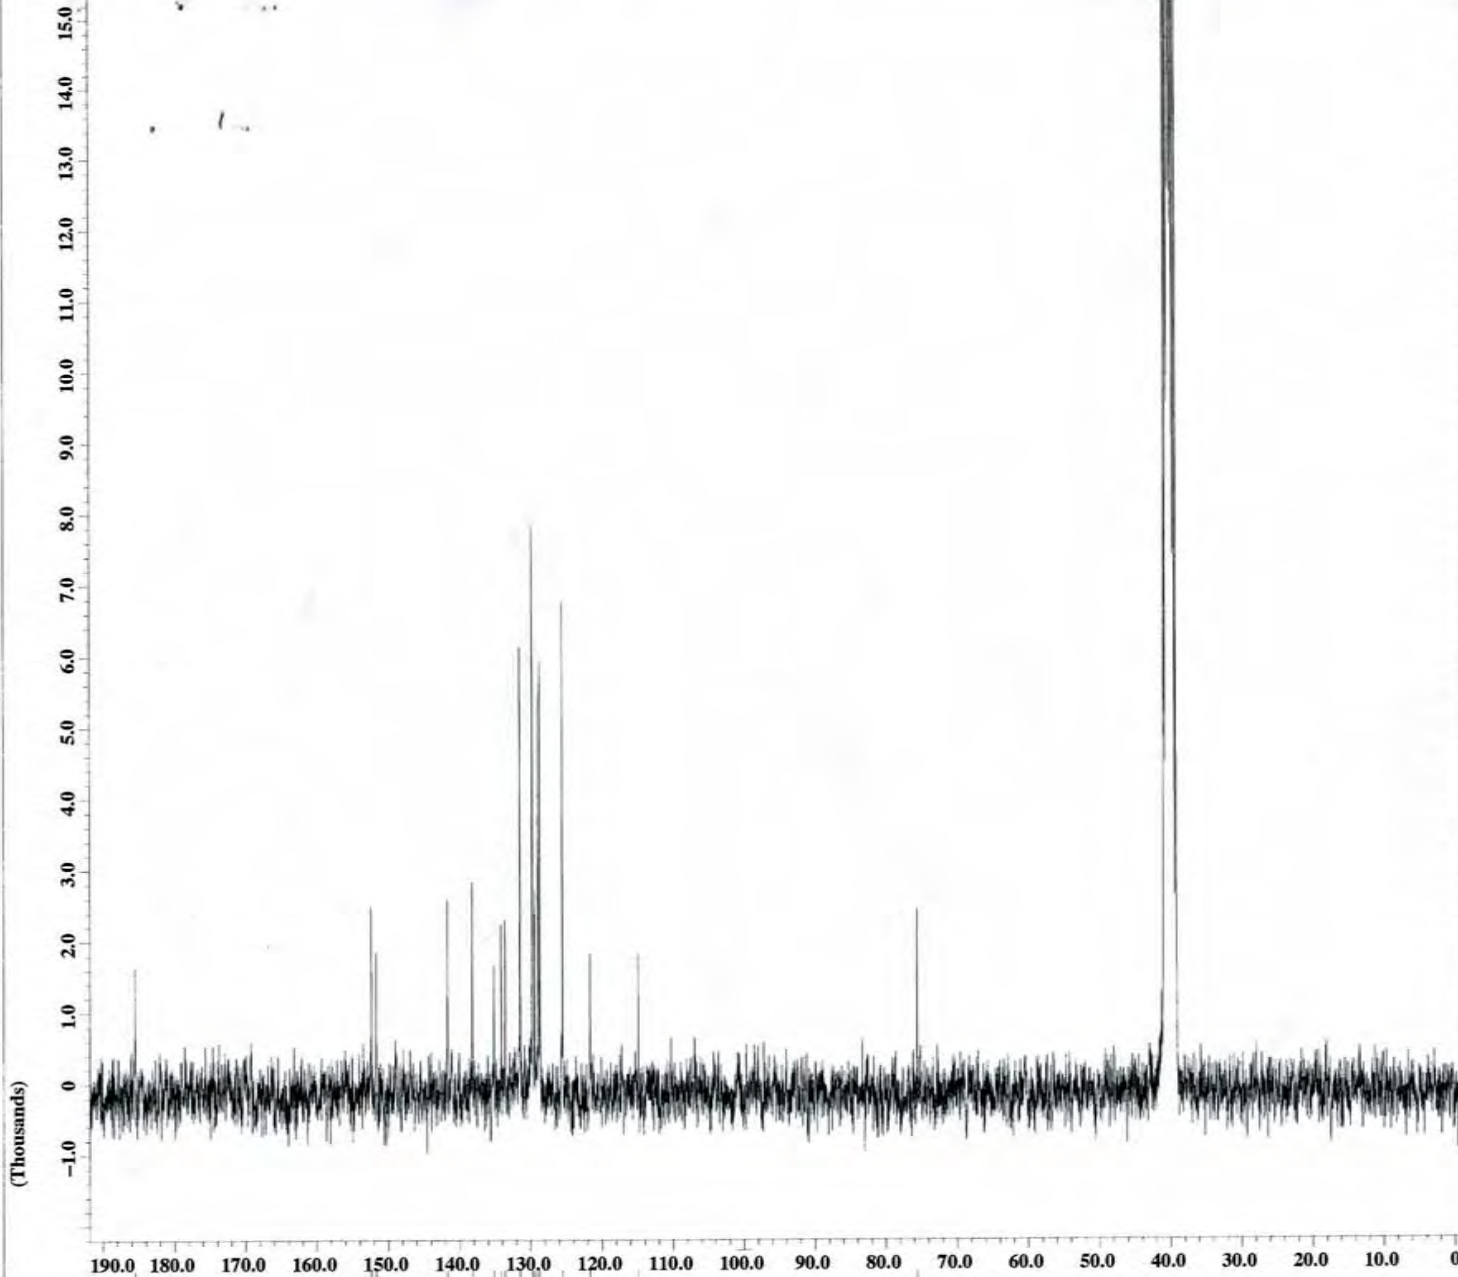

185.5243

152.3620  
151.6978  
141.7201  
138.2237  
135.1853  
134.1319  
133.5898  
131.4676  
129.7575  
129.4216  
128.9560  
128.7040  
125.5283  
121.6883  
114.9169

75.6474

X : parts per Million : 13C

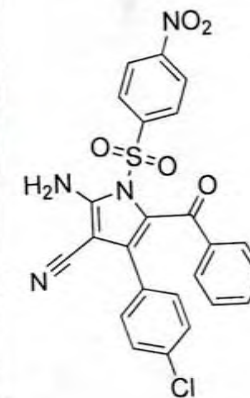

A<sub>1</sub>  
75 MHz, DMSO-d<sub>6</sub>



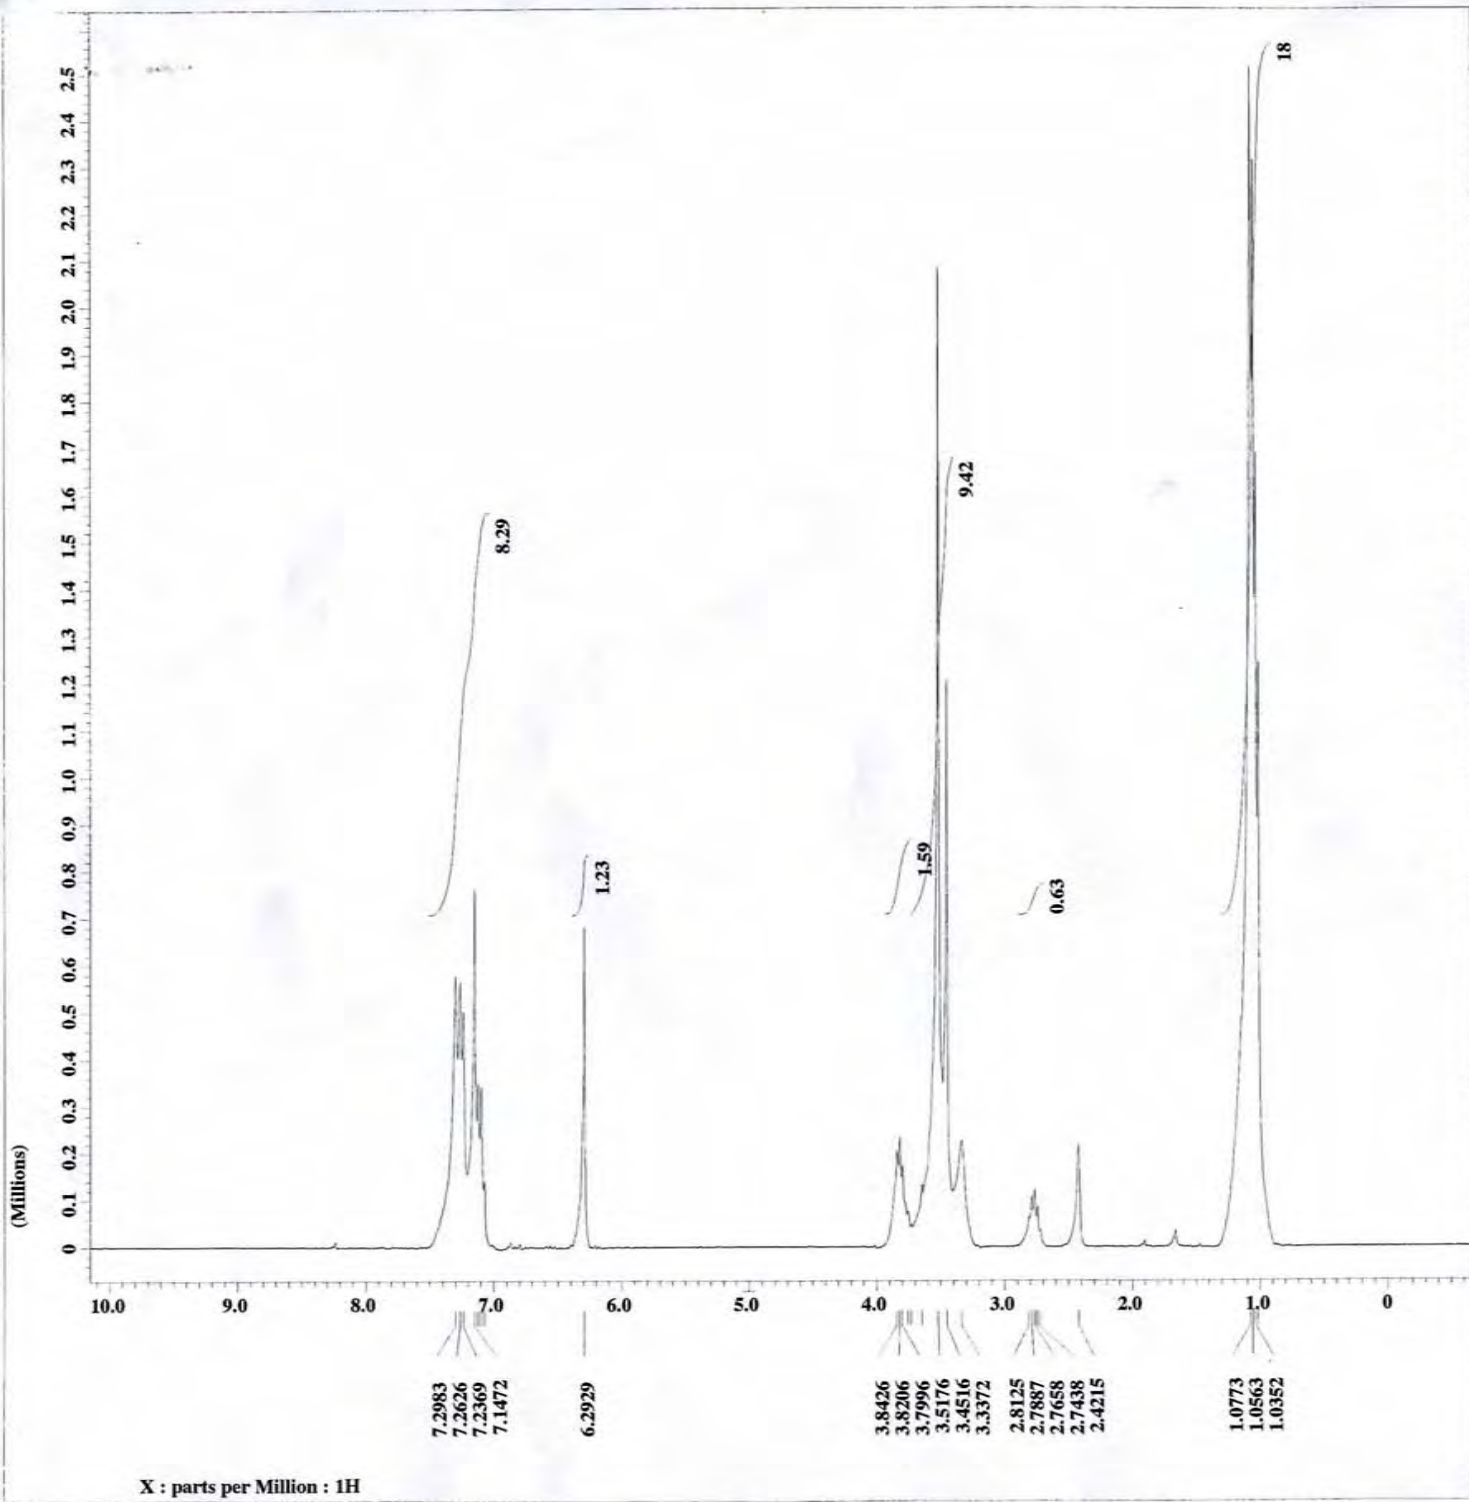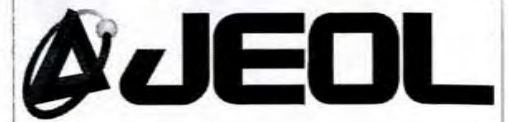

```

Filename      = ld_spectrum-96.jdf
Author       = alex
Experiment   = single_pulse.exp
Sample_id    = S#406570
Solvent      = DMSO-D6
Creation_time = 8-DEC-2010 11:11:07
Revision_time = 8-DEC-2010 11:38:55
Current_time = 8-DEC-2010 11:38:59

Comment      = Single Pulse Experime
Data_format  = 1D_REAL
Dim_size     = 16384
Dim_title    = 1H
Dim_units    = [ppm]
Dimensions   = X
Site         = Eclipse+ 300
Spectrometer = DELTA_NMR

Field_strength = 7.0586013[T] (300[MHz]
X_acq_duration = 3.6339712[s]
X_domain       = 1H
X_freq         = 300.52965592[MHz]
X_offset       = 5[ppm]
X_points       = 16384
X_prescans    = 0
X_resolution   = 0.27518105[Hz]
X_sweep        = 4.50856628[kHz]
Clipped        = FALSE
Mod_return     = 1
Scans          = 8
Total_scans   = 8

X_90_width    = 16[us]
X_acq_time     = 3.6339712[s]
X_angle        = 45[deg]
X_pulse        = 8[us]
Initial_wait   = 1[s]
Phase_preset   = 3[us]
  
```

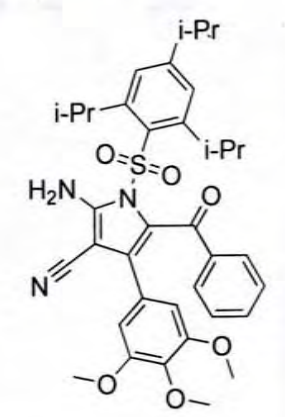

A<sub>2</sub>  
300 MHz, DMSO-d<sub>6</sub>

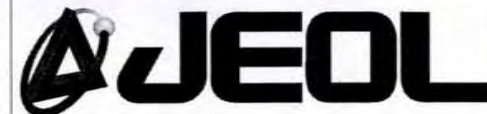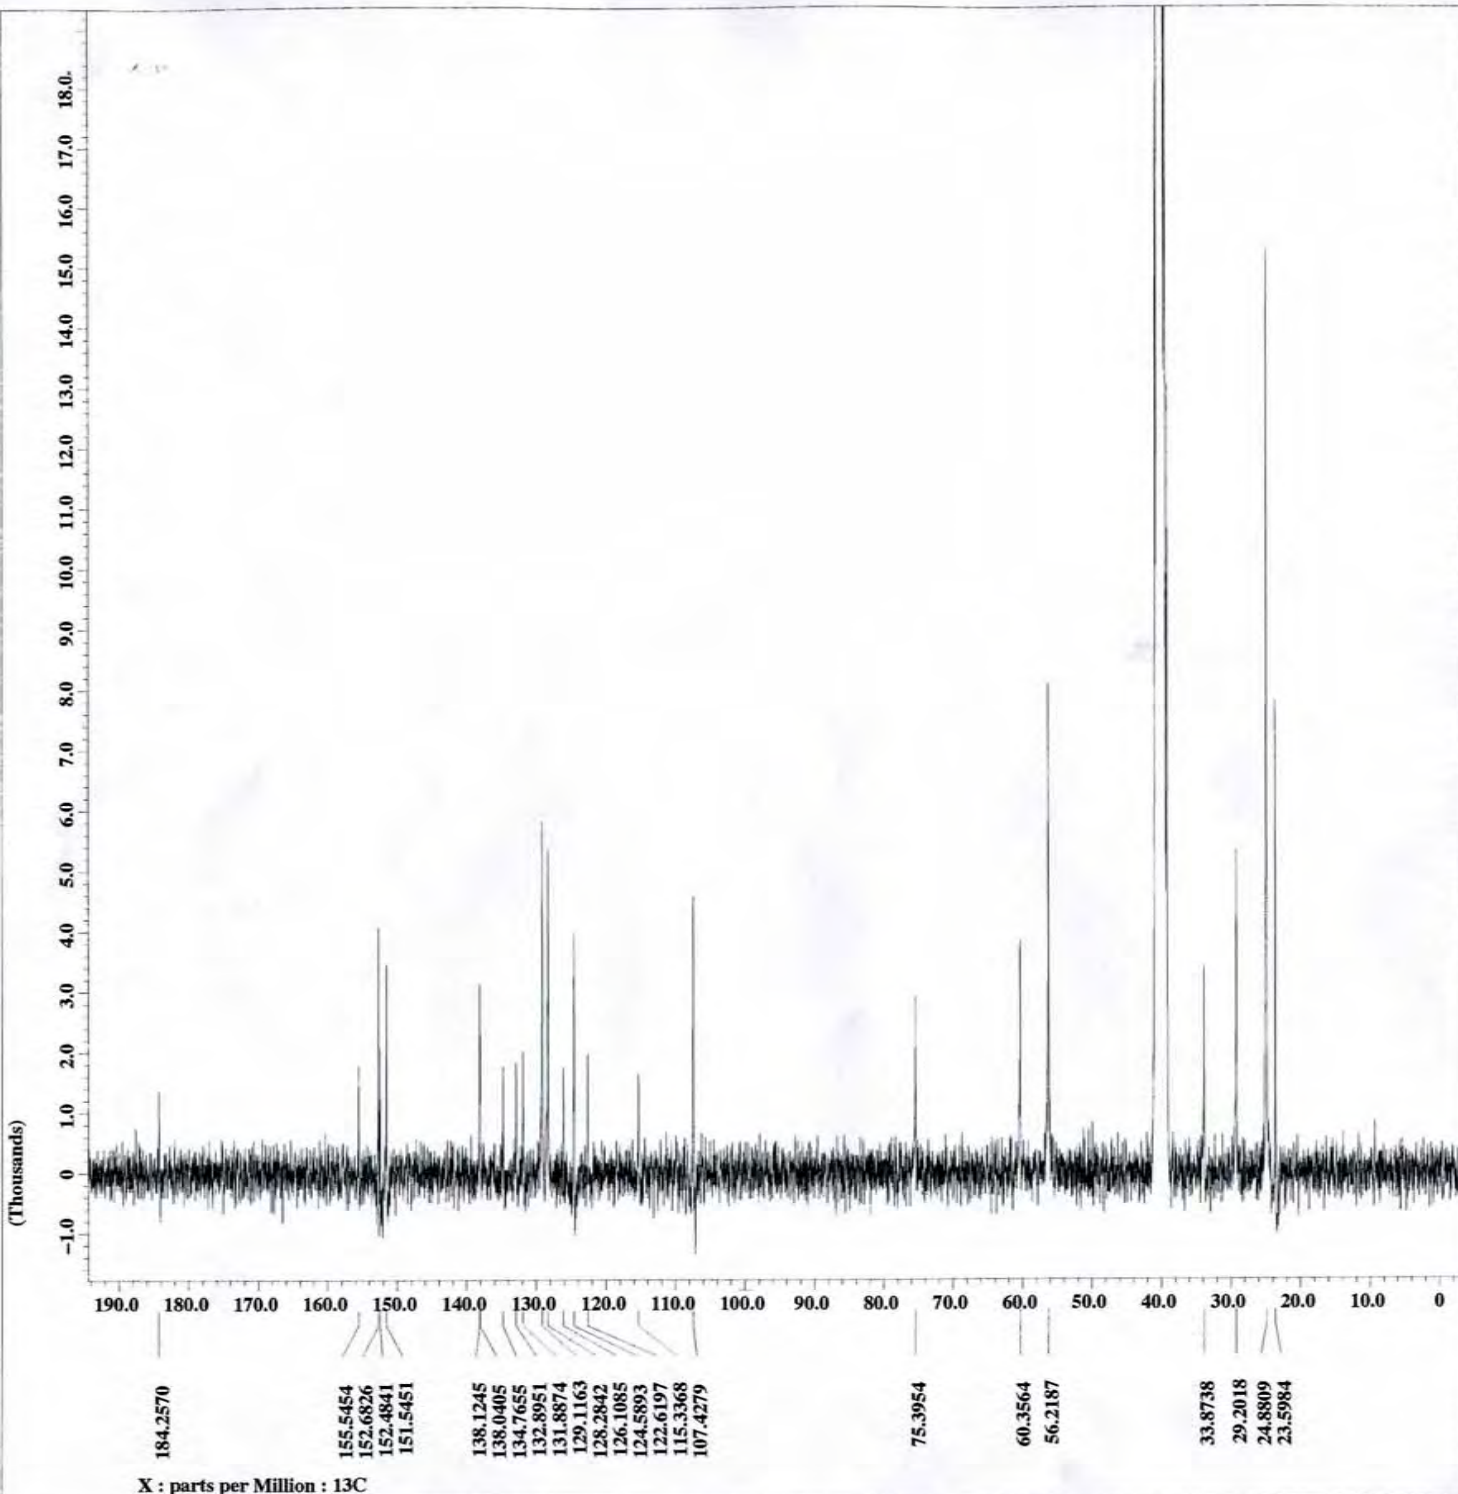

```

Filename      = 1d_13c_spectrum-59.jd
Author       = alex
Experiment   = single_pulse_dec
Sample_id    = S#412344
Solvent      = DMSO-D6
Creation_time = 8-DEC-2010 12:51:02
Revision_time = 8-DEC-2010 14:03:10
Current_time  = 8-DEC-2010 14:03:30

Comment      = Single Pulse with Bro
Data_format  = 1D REAL
Dim_size     = 32768
Dim_title    = 13C
Dim_units    = [ppm]
Dimensions   = X
Site         = Eclipse+ 300
Spectrometer = DELTA_NMR

Field_strength = 7.0586013[T] (300[MHz]
X_acq_duration = 1.7334272[s]
X_domain       = 13C
X_freq         = 75.56823426[MHz]
X_offset       = 100[ppm]
X_points       = 32768
X_prescans     = 4
X_resolution   = 0.57689184[Hz]
X_sweep        = 18.90359168[kHz]
Irr_domain     = 1H
Irr_freq       = 300.52965592[MHz]
Irr_offset     = 5[ppm]
Clipped        = FALSE
Mod_return     = 1
Scans          = 2000
Total_scans    = 2000

X_90_width    = 8.1[us]
X_acq_time    = 1.7334272[s]
X_angle       = 30[deg]
X_pulse       = 2.7[us]
Initial_wait  = 1[s]
Phase_preset  = 3[us]
Recvr_gain    = 15

```

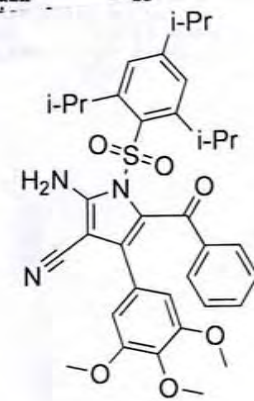

A<sub>2</sub>  
75 MHz, DMSO-d<sub>6</sub>



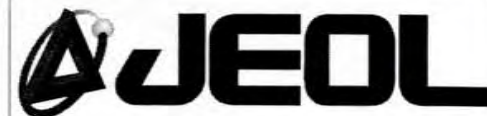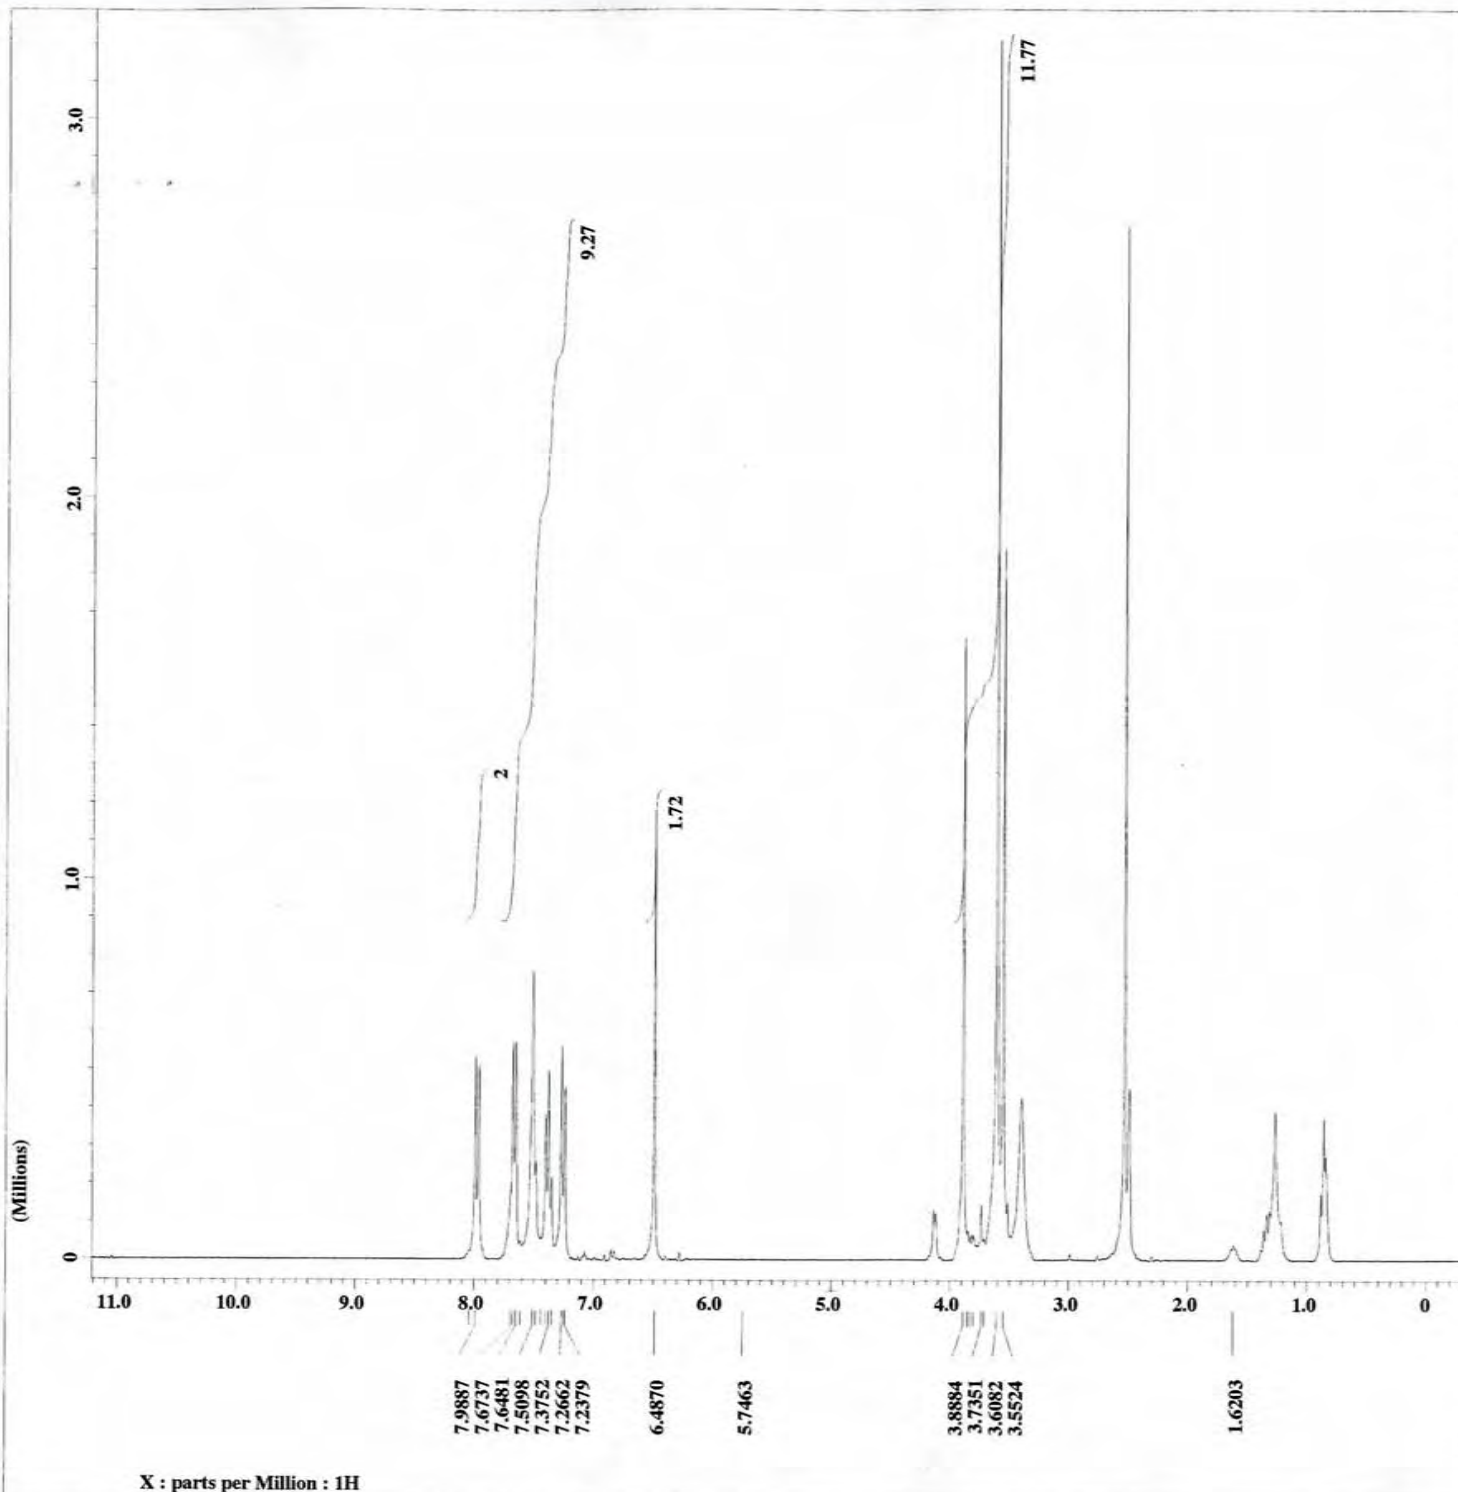

Filename = 1d\_spectrum-194.jdf  
Author = alex  
Experiment = single\_pulse.exp  
Sample\_id = S#487424  
Solvent = DMSO-D6  
Creation\_time = 17-DEC-2010 13:25:54  
Revision\_time = 17-DEC-2010 13:41:47  
Current\_time = 17-DEC-2010 13:41:51

Comment = Single Pulse Experime  
Data\_format = 1D REAL  
Dim\_size = 16384  
Dim\_title = 1H  
Dim\_units = [ppm]  
Dimensions = X  
Site = Eclipse+ 300  
Spectrometer = DELTA\_NMR

Field\_strength = 7.0586013[T] (300[MHz])  
X\_acq\_duration = 3.6339712[s]  
X\_domain = 1H  
X\_freq = 300.52965592[MHz]  
X\_offset = 5[ppm]  
X\_points = 16384  
X\_prescans = 0  
X\_resolution = 0.27518105[Hz]  
X\_sweep = 4.50856628[kHz]  
Clipped = FALSE  
Mod\_return = 1  
Scans = 8  
Total\_scans = 8

X\_90\_width = 16[us]  
X\_acq\_time = 3.6339712[s]  
X\_angle = 45[deg]  
X\_pulse = 8[us]  
Initial\_wait = 1[s]  
Phase\_preset = 3[us]  
Recvr\_gain = 15  
Relaxation\_delay = 4[s]  
Temp\_get = 21.8[dC]  
Unblank\_time = 2[us]

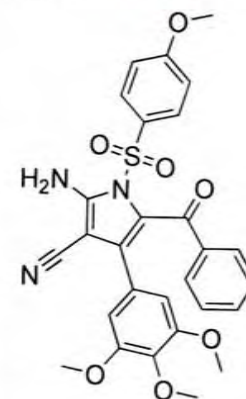

A<sub>3</sub>  
300 MHz, DMSO-d<sub>6</sub>

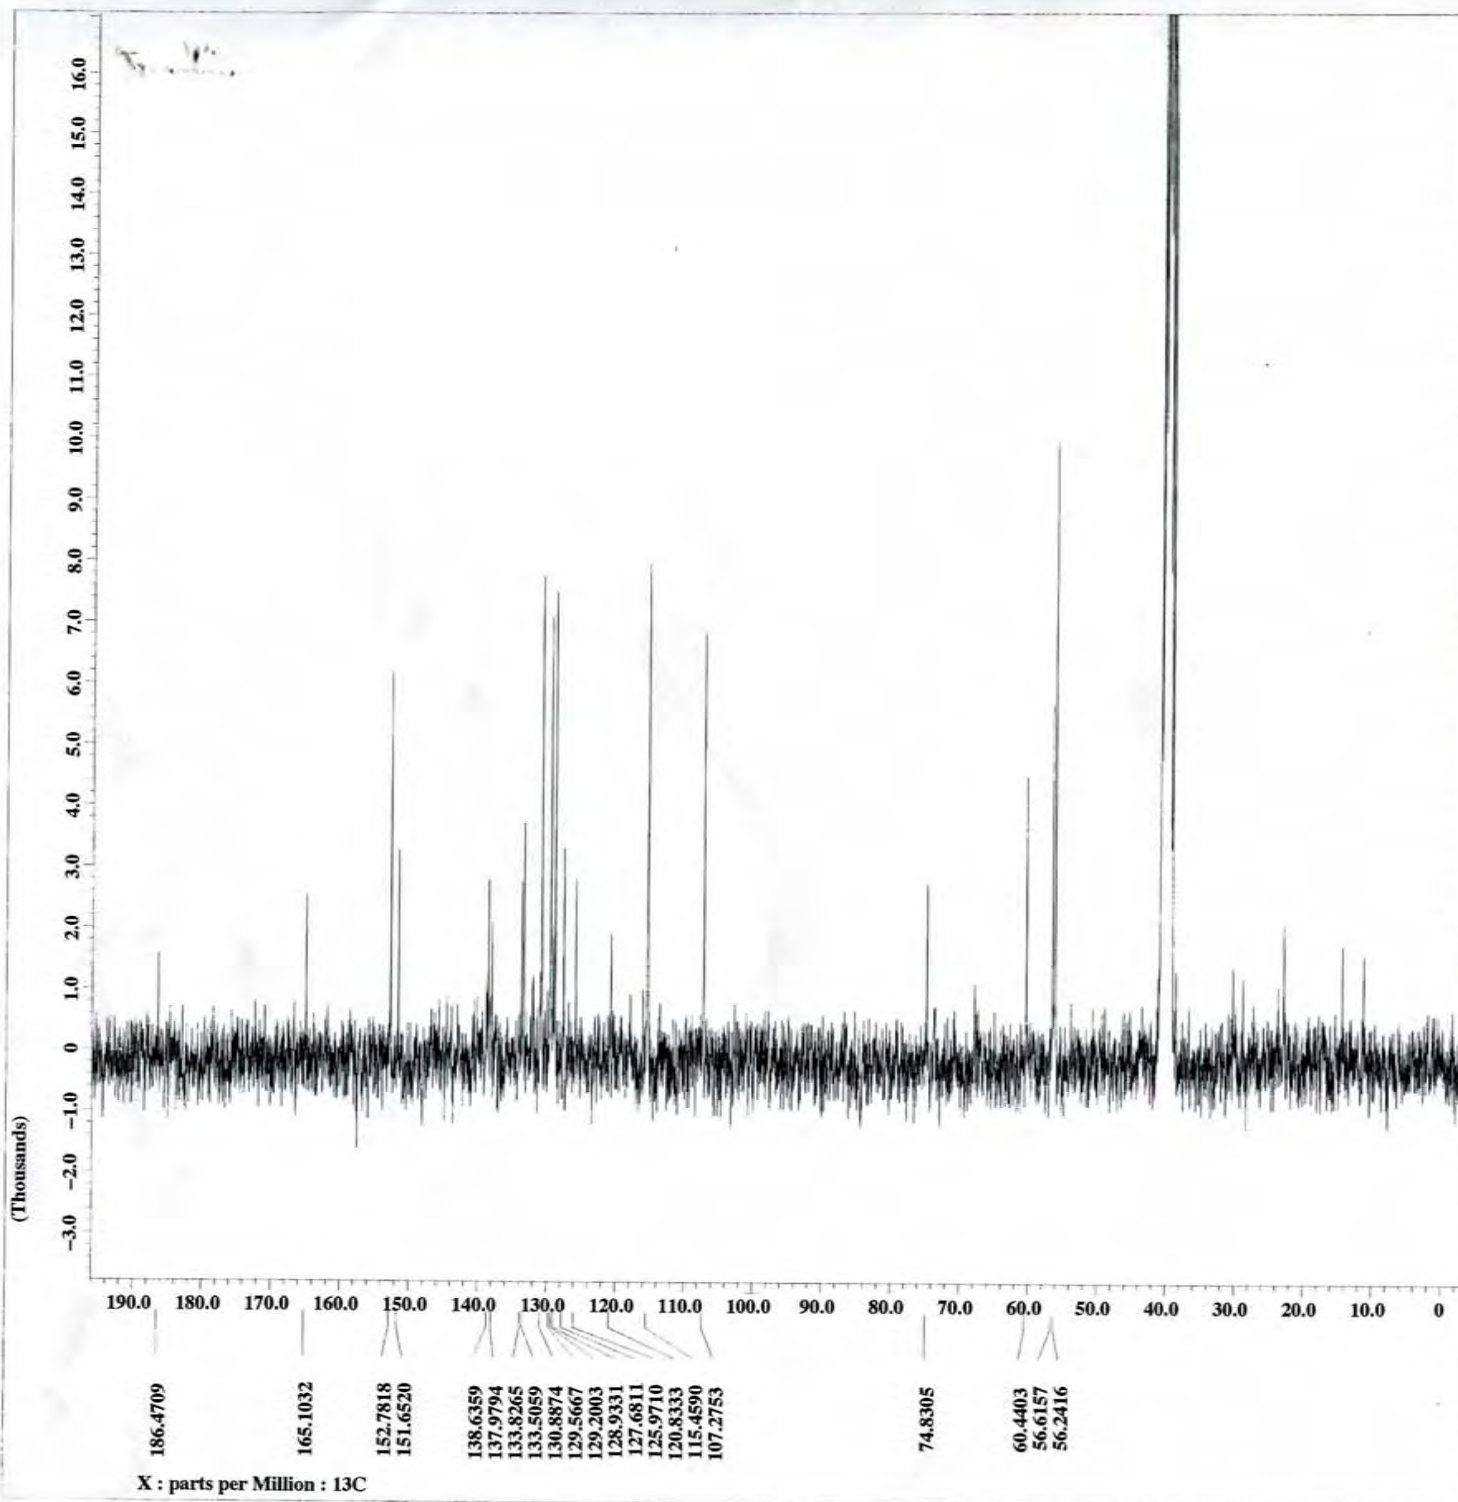

Filename = ld\_13c\_spectrum-70.jd  
 Author = alex  
 Experiment = single\_pulse\_dec  
 Sample\_id = S563071  
 Solvent = DMSO-D6  
 Creation\_time = 9-DEC-2010 16:16:45  
 Revision\_time = 9-DEC-2010 18:36:28  
 Current\_time = 9-DEC-2010 18:37:30

Comment = Single Pulse with Bro  
 Data\_format = 1D\_COMPLEX  
 Dim\_size = 32768  
 Dim\_title = 13C  
 Dim\_units = [ppm]  
 Dimensions = X  
 Site = Eclipse+ 300  
 Spectrometer = DELTA\_NMR

Field\_strength = 7.0586013[T] (300[MHz])  
 X\_acq\_duration = 1.7334272[s]  
 X\_domain = 13C  
 X\_freq = 75.56823426[MHz]  
 X\_offset = 100[ppm]  
 X\_points = 32768  
 X\_prescans = 4  
 X\_resolution = 0.57689184[Hz]  
 X\_sweep = 18.90359168[kHz]  
 Irr\_domain = 1H  
 Irr\_freq = 300.52965592[MHz]  
 Irr\_offset = 5[ppm]  
 Clipped = FALSE  
 Mod\_return = 1  
 Scans = 1000  
 Total\_scans = 1000  
 X\_90\_width = 8.1[us]  
 X\_acq\_time = 1.7334272[s]  
 X\_angle = 30[deg]  
 X\_pulse = 2.7[us]  
 Initial\_wait = 1[s]  
 Phase\_preset = 3[us]

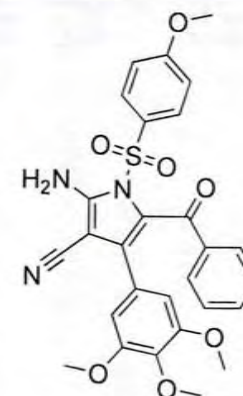

$A_3$   
 75 MHz, DMSO- $d_6$



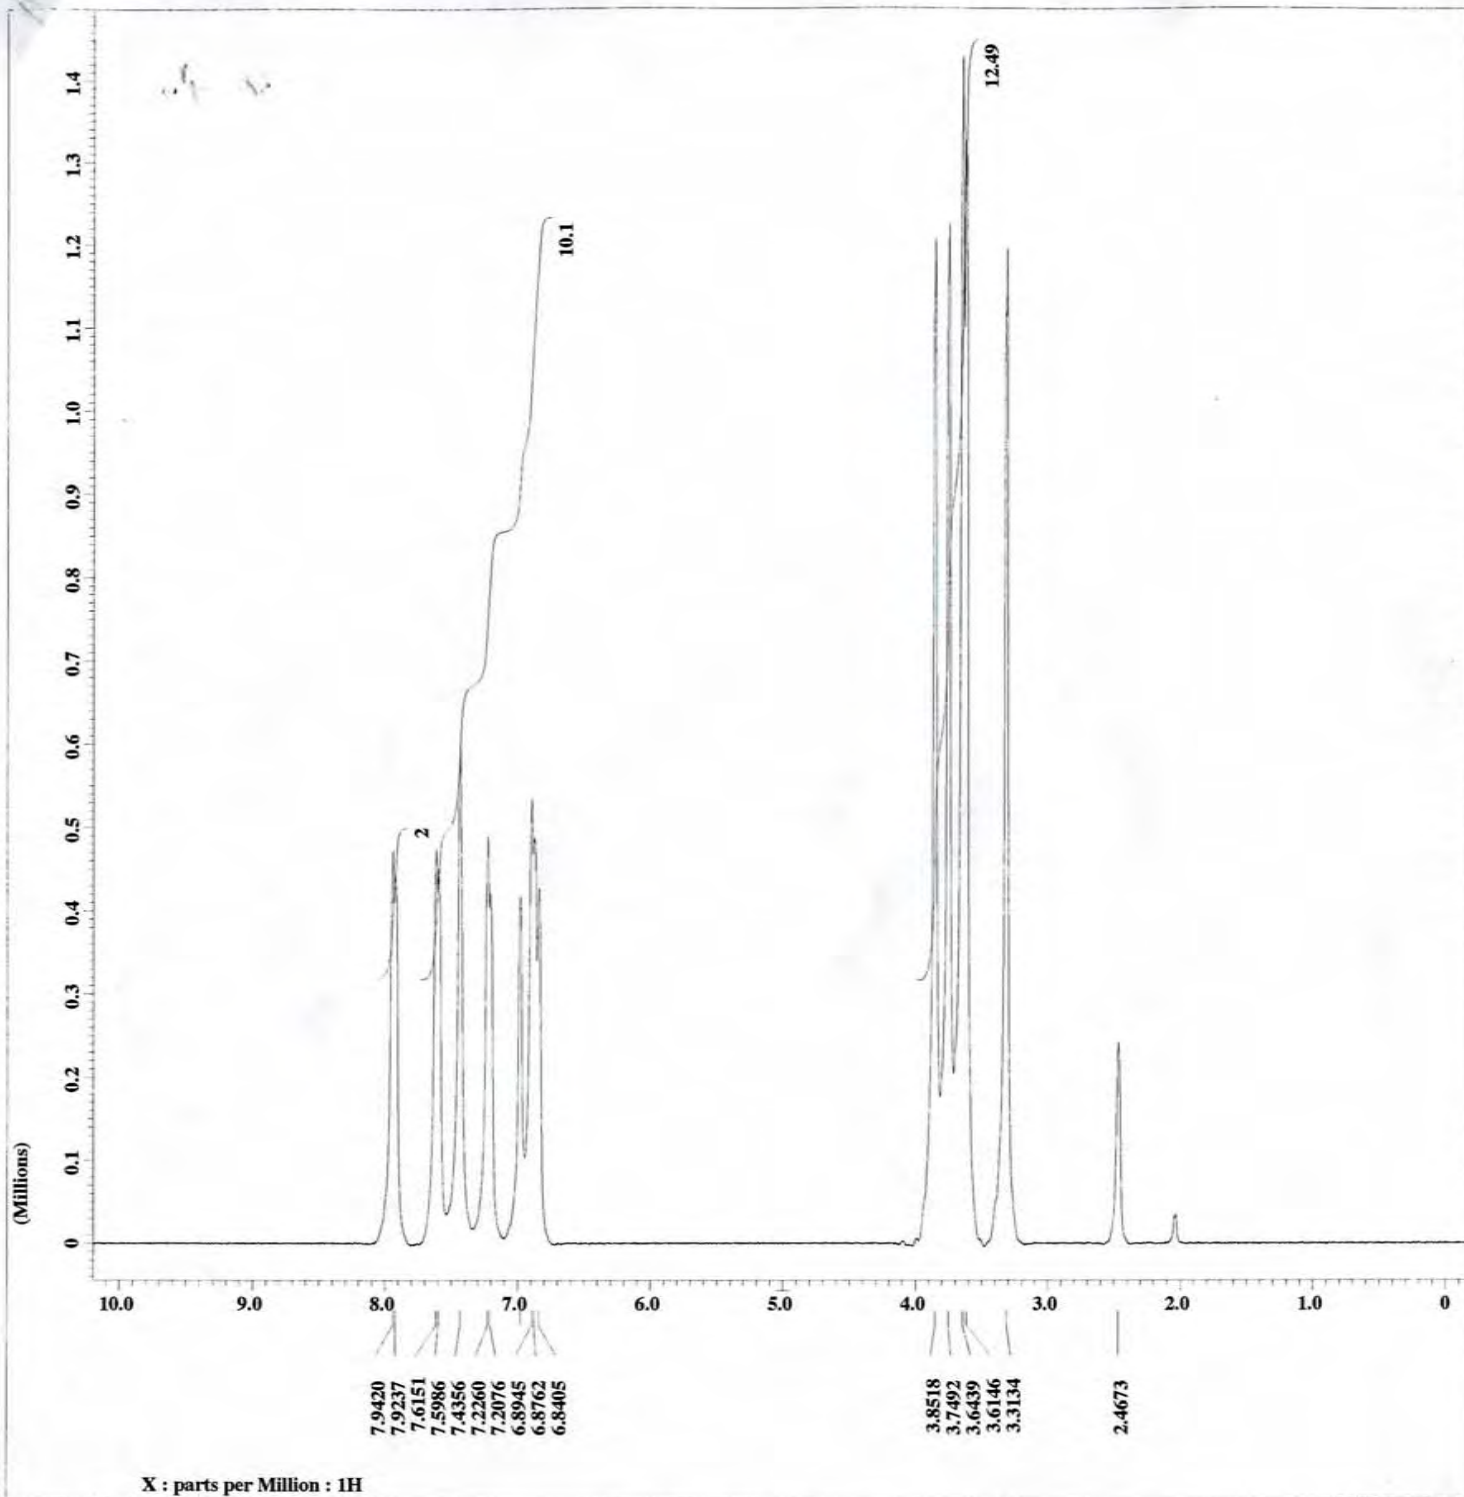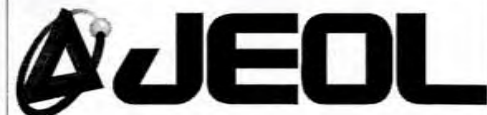

Filename = ld\_spectrum-145.jdf  
 Author = alex  
 Experiment = single\_pulse.exp  
 Sample\_id = S#469479  
 Solvent = DMSO-D6  
 Creation\_time = 10-DEC-2010 12:56:00  
 Revision\_time = 10-DEC-2010 19:42:22  
 Current\_time = 10-DEC-2010 19:42:29

Comment = Single Pulse Experime  
 Data\_format = 1D\_REAL  
 Dim\_size = 16384  
 Dim\_title = 1H  
 Dim\_units = [ppm]  
 Dimensions = X  
 Site = Eclipse+ 300  
 Spectrometer = DELTA\_NMR

Field\_strength = 7.0586013[T] (300[MHz]  
 X\_acq\_duration = 3.6339712[s]  
 X\_domain = 1H  
 X\_freq = 300.52965592[MHz]  
 X\_offset = 5[ppm]  
 X\_points = 16384  
 X\_prescans = 0  
 X\_resolution = 0.27518105[Hz]  
 X\_sweep = 4.50856628[kHz]  
 Clipped = FALSE  
 Mod\_return = 1  
 Scans = 8  
 Total\_scans = 8

X\_90\_width = 16[us]  
 X\_acq\_time = 3.6339712[s]  
 X\_angle = 45[deg]  
 X\_pulse = 8[us]  
 Initial\_wait = 1[s]  
 Phase\_preset = 3[us]  
 Recvr\_gain = 15  
 Relaxation\_delay = 4[s]  
 Temp\_get = 22.7[dC]

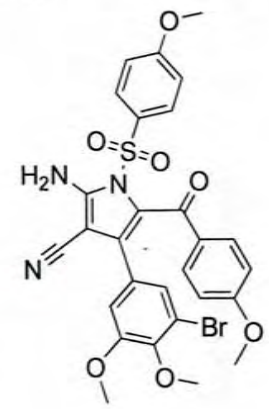

A<sub>4</sub>  
300 MHz, DMSO-d<sub>6</sub>

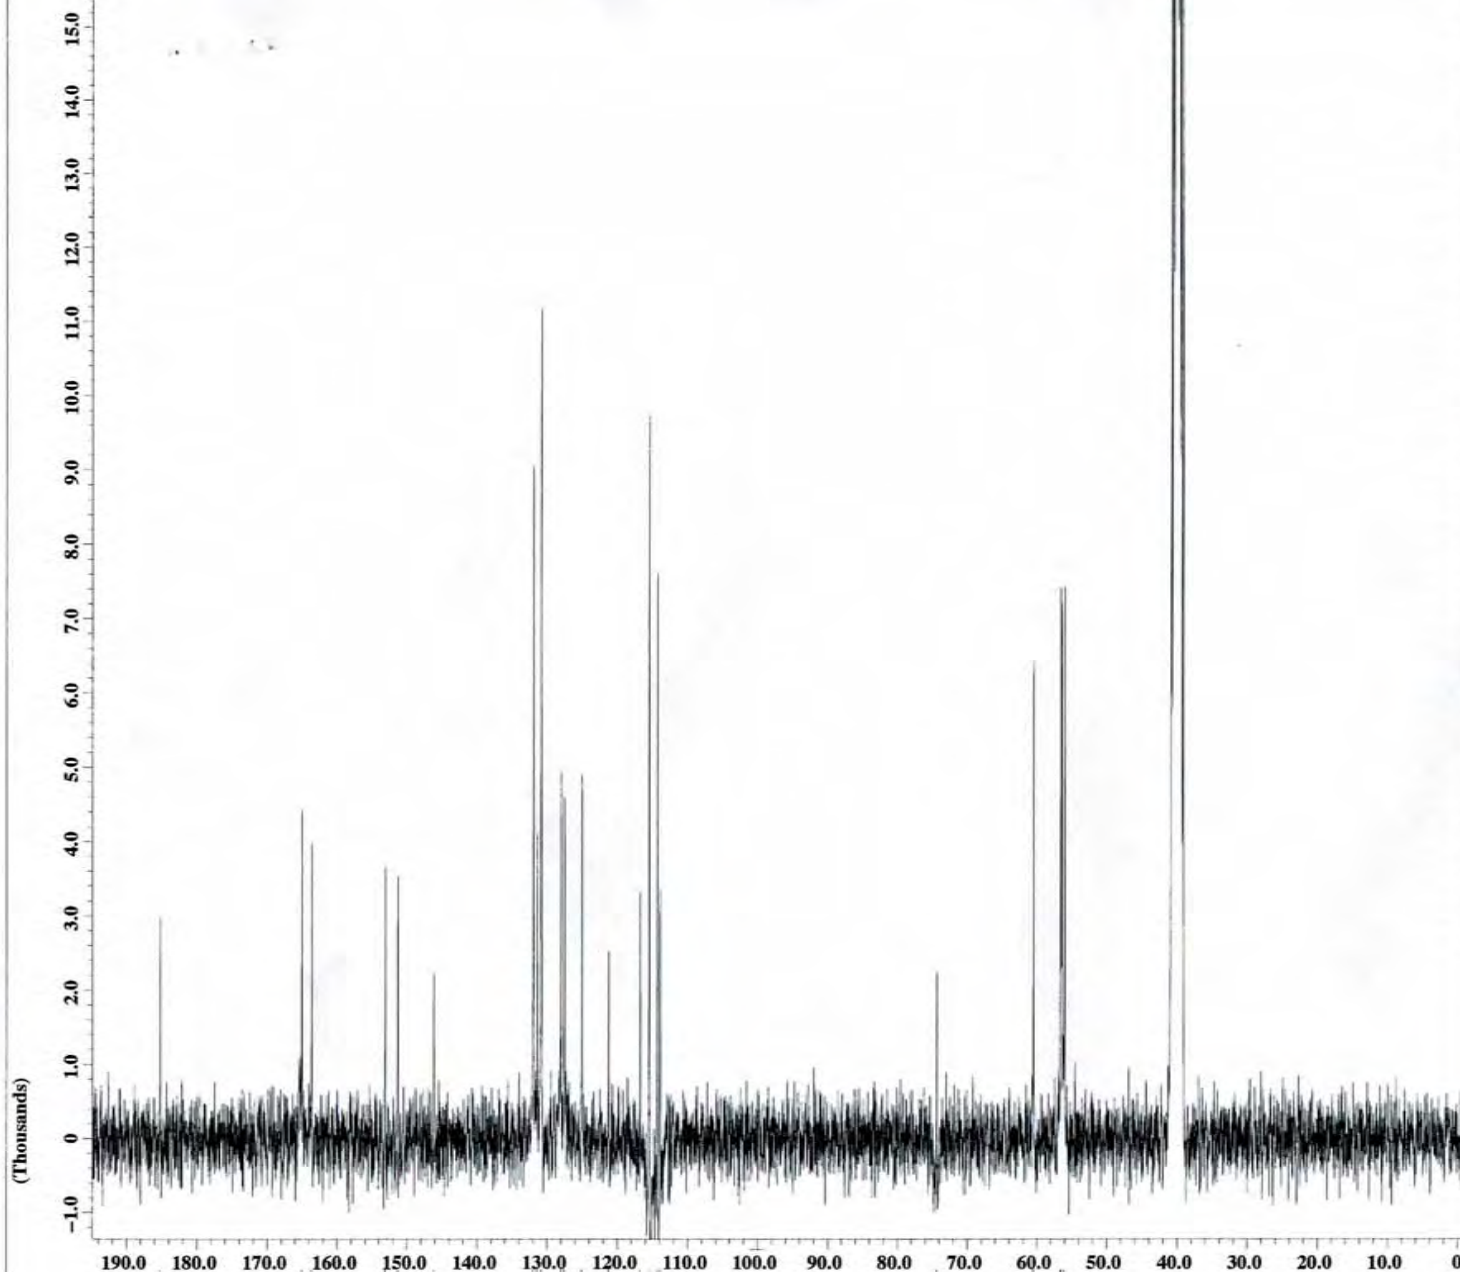

185.2189  
 165.0498  
 163.6680  
 153.1254  
 151.3161  
 146.2013  
 131.9638  
 131.4370  
 130.8568  
 128.0093  
 127.5284  
 125.0473  
 115.4971  
 114.3215  
 113.9474  
 74.3801  
 60.5396  
 56.6157  
 56.4706  
 56.0737

X : parts per Million : 13C

Filename = ld\_13c\_spectrum-81.jd  
 Author = alex  
 Experiment = single\_pulse\_dec  
 Sample\_id = S#540132  
 Solvent = DMSO-D6  
 Creation\_time = 10-DEC-2010 15:47:35  
 Revision\_time = 10-DEC-2010 19:32:00  
 Current\_time = 10-DEC-2010 19:32:09

Comment = Single Pulse with Bro  
 Data\_format = 1D REAL  
 Dim\_size = 32768  
 Dim\_title = 13C  
 Dim\_units = [ppm]  
 Dimensions = X  
 Site = Eclipse+ 300  
 Spectrometer = DELTA\_NMR

Field\_strength = 7.0586013[T] (300[MHz]  
 X\_acq\_duration = 1.7334272[s]  
 X\_domain = 13C  
 X\_freq = 75.56823426[MHz]  
 X\_offset = 100[ppm]  
 X\_points = 32768  
 X\_prescans = 4  
 X\_resolution = 0.57689184[Hz]  
 X\_sweep = 18.90359168[kHz]  
 Irr\_domain = 1H  
 Irr\_freq = 300.52965592[MHz]  
 Irr\_offset = 5[ppm]  
 Clipped = FALSE  
 Mod\_return = 1  
 Scans = 1200  
 Total\_scans = 1200

X\_90\_width = 8.1[us]  
 X\_acq\_time = 1.7334272[s]  
 X\_angle = 30[deg]  
 X\_pulse = 2.7[us]  
 Initial\_wait = 1[s]  
 Phase\_preset = 3[us]  
 Recvr\_gain = -

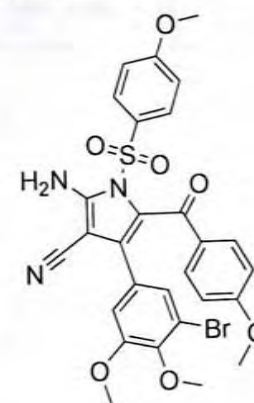

A<sub>4</sub>  
 75 MHz, DMSO-d<sub>6</sub>

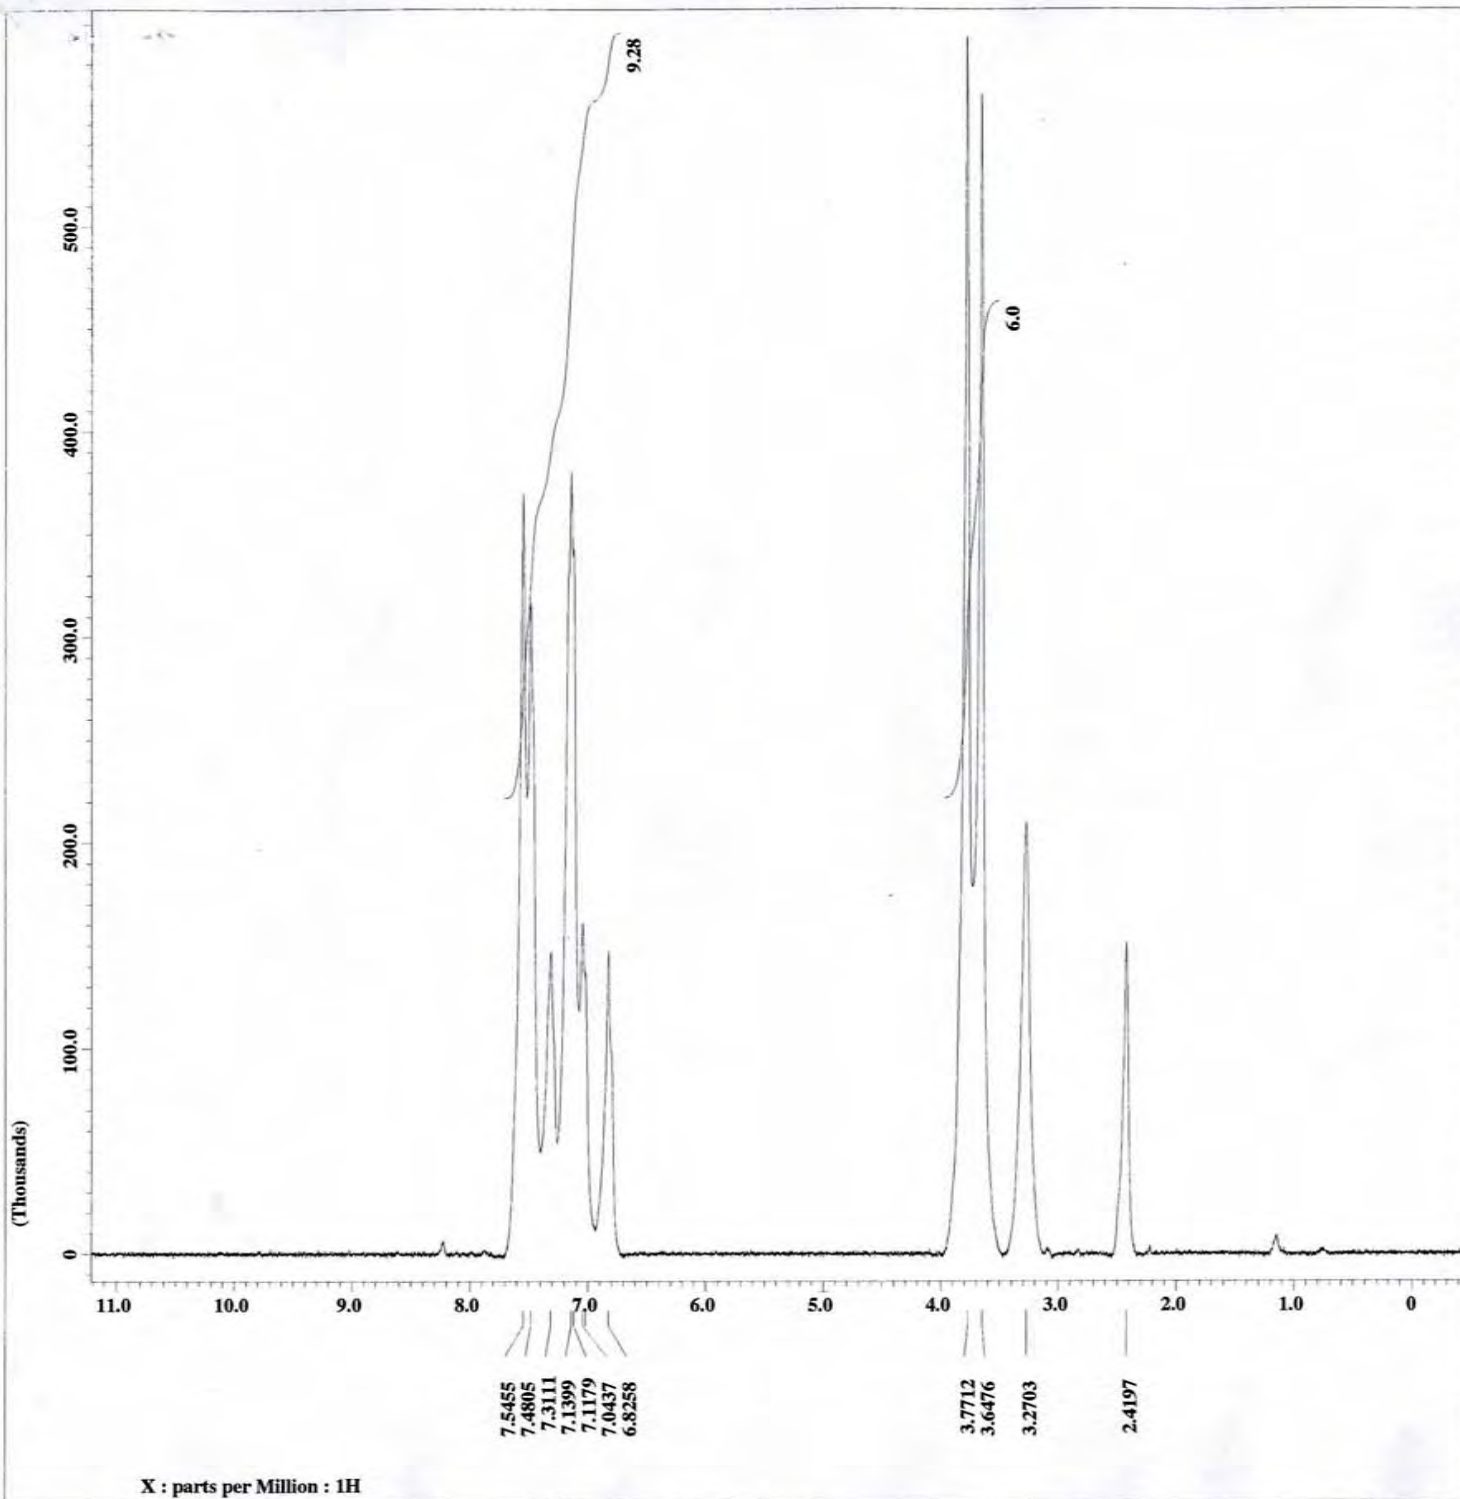

X : parts per Million : 1H

# JEOL

Filename = ld\_spectrum-104.jdf  
 Author = alex  
 Experiment = single\_pulse.exp  
 Sample\_id = S#594298  
 Solvent = DMSO-D6  
 Creation time = 8-DEC-2010 16:23:58  
 Revision time = 8-DEC-2010 18:41:52  
 Current\_time = 8-DEC-2010 18:42:04

Comment = Single Pulse Experime  
 Data\_format = 1D\_REAL  
 Dim\_size = 16384  
 Dim\_title = 1H  
 Dim\_units = [ppm]  
 Dimensions = X  
 Site = Eclipse+ 300  
 Spectrometer = DELTA\_NMR

Field\_strength = 7.0586013[T] (300[MHz]  
 X\_acq\_duration = 3.6339712[s]  
 X\_domain = 1H  
 X\_freq = 300.52965592[MHz]  
 X\_offset = 5[ppm]  
 X\_points = 16384  
 X\_prescans = 0  
 X\_resolution = 0.27518105[Hz]  
 X\_sweep = 4.50856628[kHz]  
 Clipped = FALSE  
 Mod\_return = 1  
 Scans = 8  
 Total\_scans = 8

X\_90\_width = 16[us]  
 X\_acq\_time = 3.6339712[s]  
 X\_angle = 45[deg]  
 X\_pulse = 8[us]  
 Initial\_wait = 1[s]  
 Phase\_preset = 3[us]  
 Recvr\_gain = 15

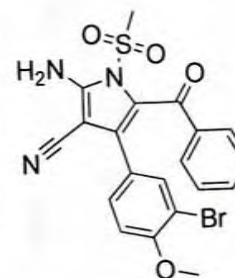

A<sub>5</sub>  
 300 MHz, DMSO-d<sub>6</sub>



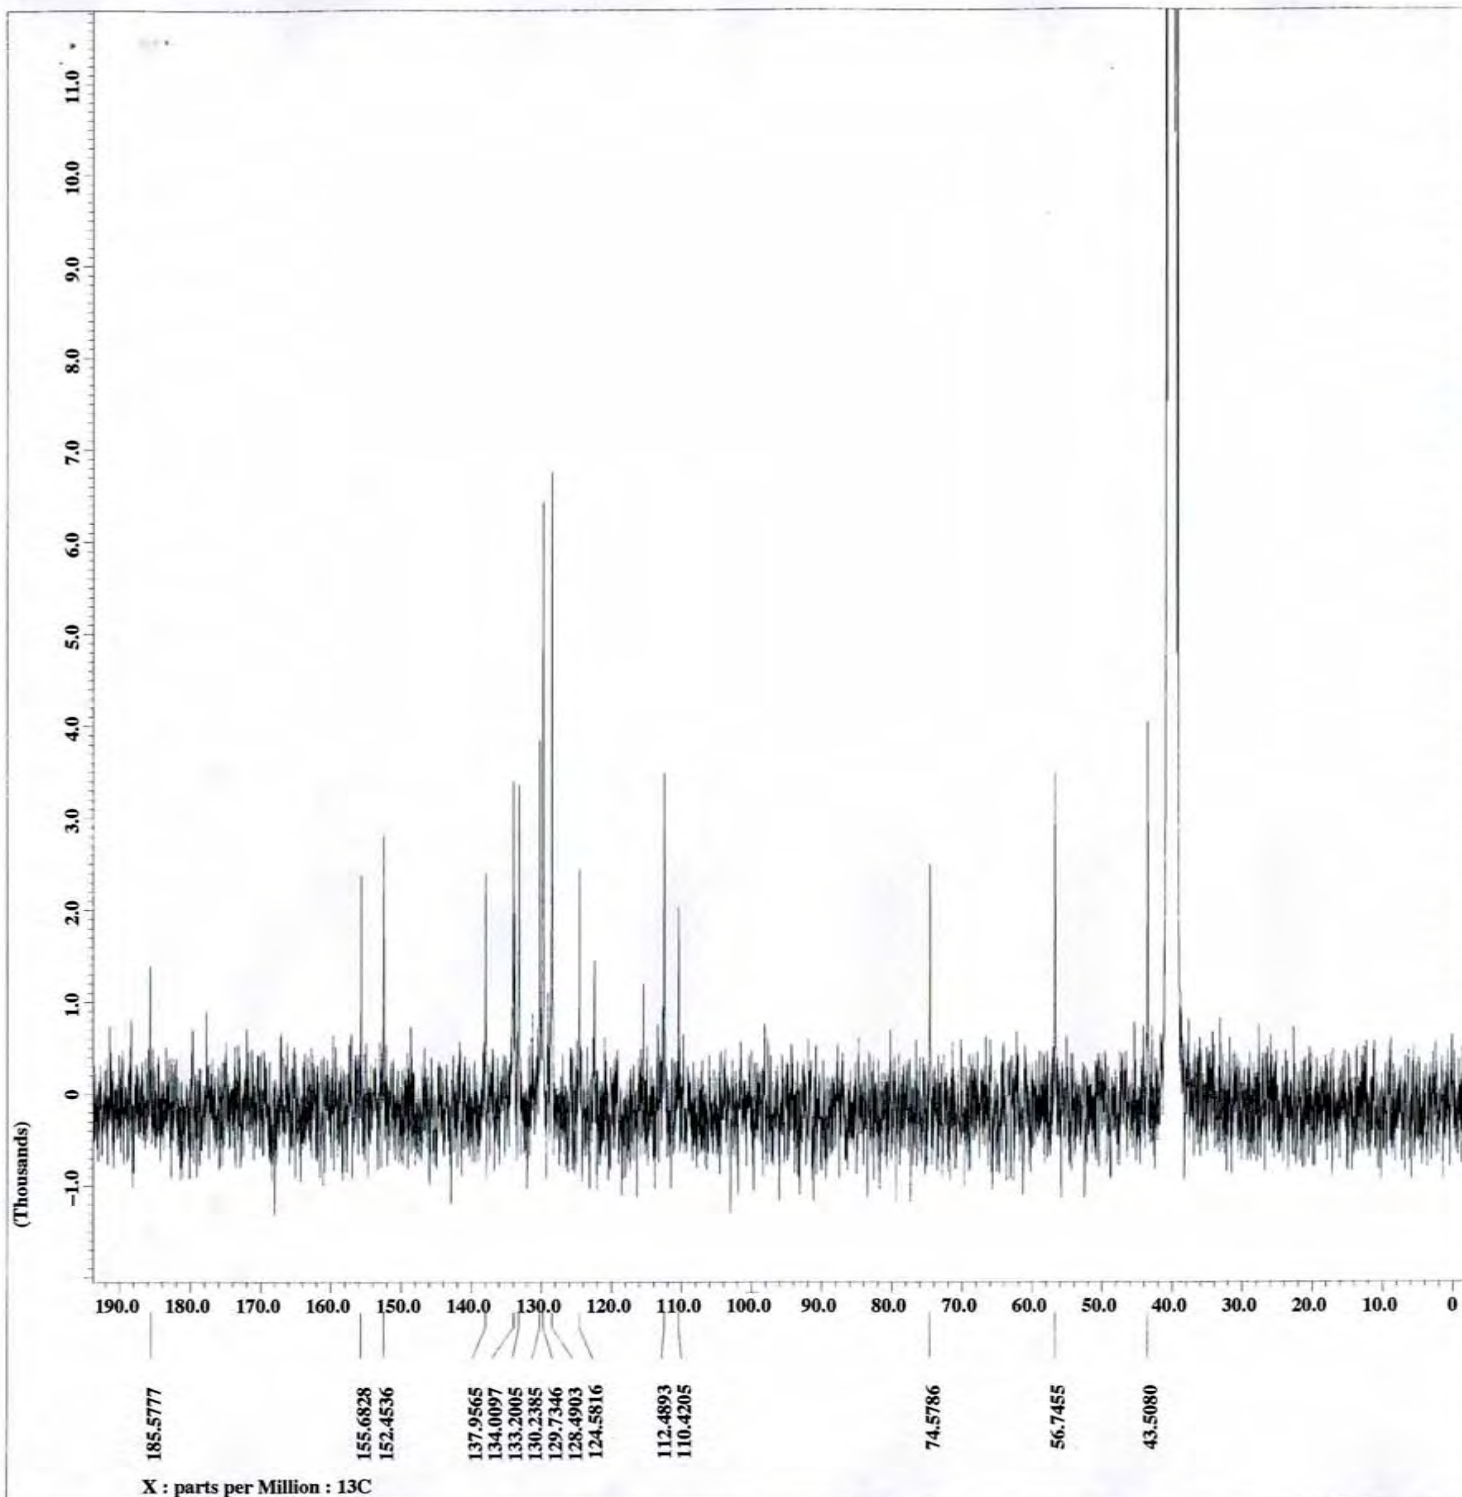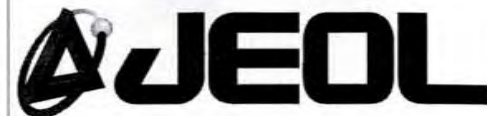

```

Filename      = ld_13c_spectrum-64.jd
Author       = alex
Experiment    = single_pulse_dec
Sample_id    = S#595398
Solvent      = DMSO-D6
Creation_time = 8-DEC-2010 17:19:39
Revision_time = 8-DEC-2010 18:36:36
Current_time  = 8-DEC-2010 18:39:00
  
```

```

Comment      = Single Pulse with Bro
Data_format   = 1D_COMPLEX
Dim_size     = 32768
Dim_title    = 13C
Dim_units    = [ppm]
Dimensions   = X
Site         = Eclipse+ 300
Spectrometer = DELTA_NMR
  
```

```

Field_strength = 7.0586013[T] (300[MHz]
X_acq_duration = 1.7334272[s]
X_domain      = 13C
X_freq       = 75.56823426[MHz]
X_offset     = 100[ppm]
X_points     = 32768
X_prescans   = 4
X_resolution = 0.57689184[Hz]
X_sweep      = 18.90359168[kHz]
Irr_domain   = 1H
Irr_freq     = 300.52965592[MHz]
Irr_offset   = 5[ppm]
Clipped      = FALSE
Mod_return   = 1
Scans        = 1200
Total_scans  = 1200
  
```

```

X_90_width   = 8.1[us]
X_acq_time   = 1.7334272[s]
X_angle      = 30[deg]
X_pulse      = 2.7[us]
Initial_wait = 1[s]
Phase_preset = 3[us]
Recvr_gain   = 15
Relaxation_delay = 1[s]
  
```

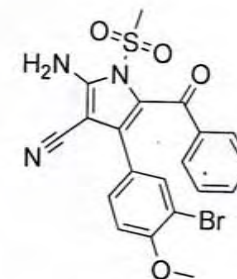

A<sub>5</sub>  
75 MHz, DMSO-d<sub>6</sub>

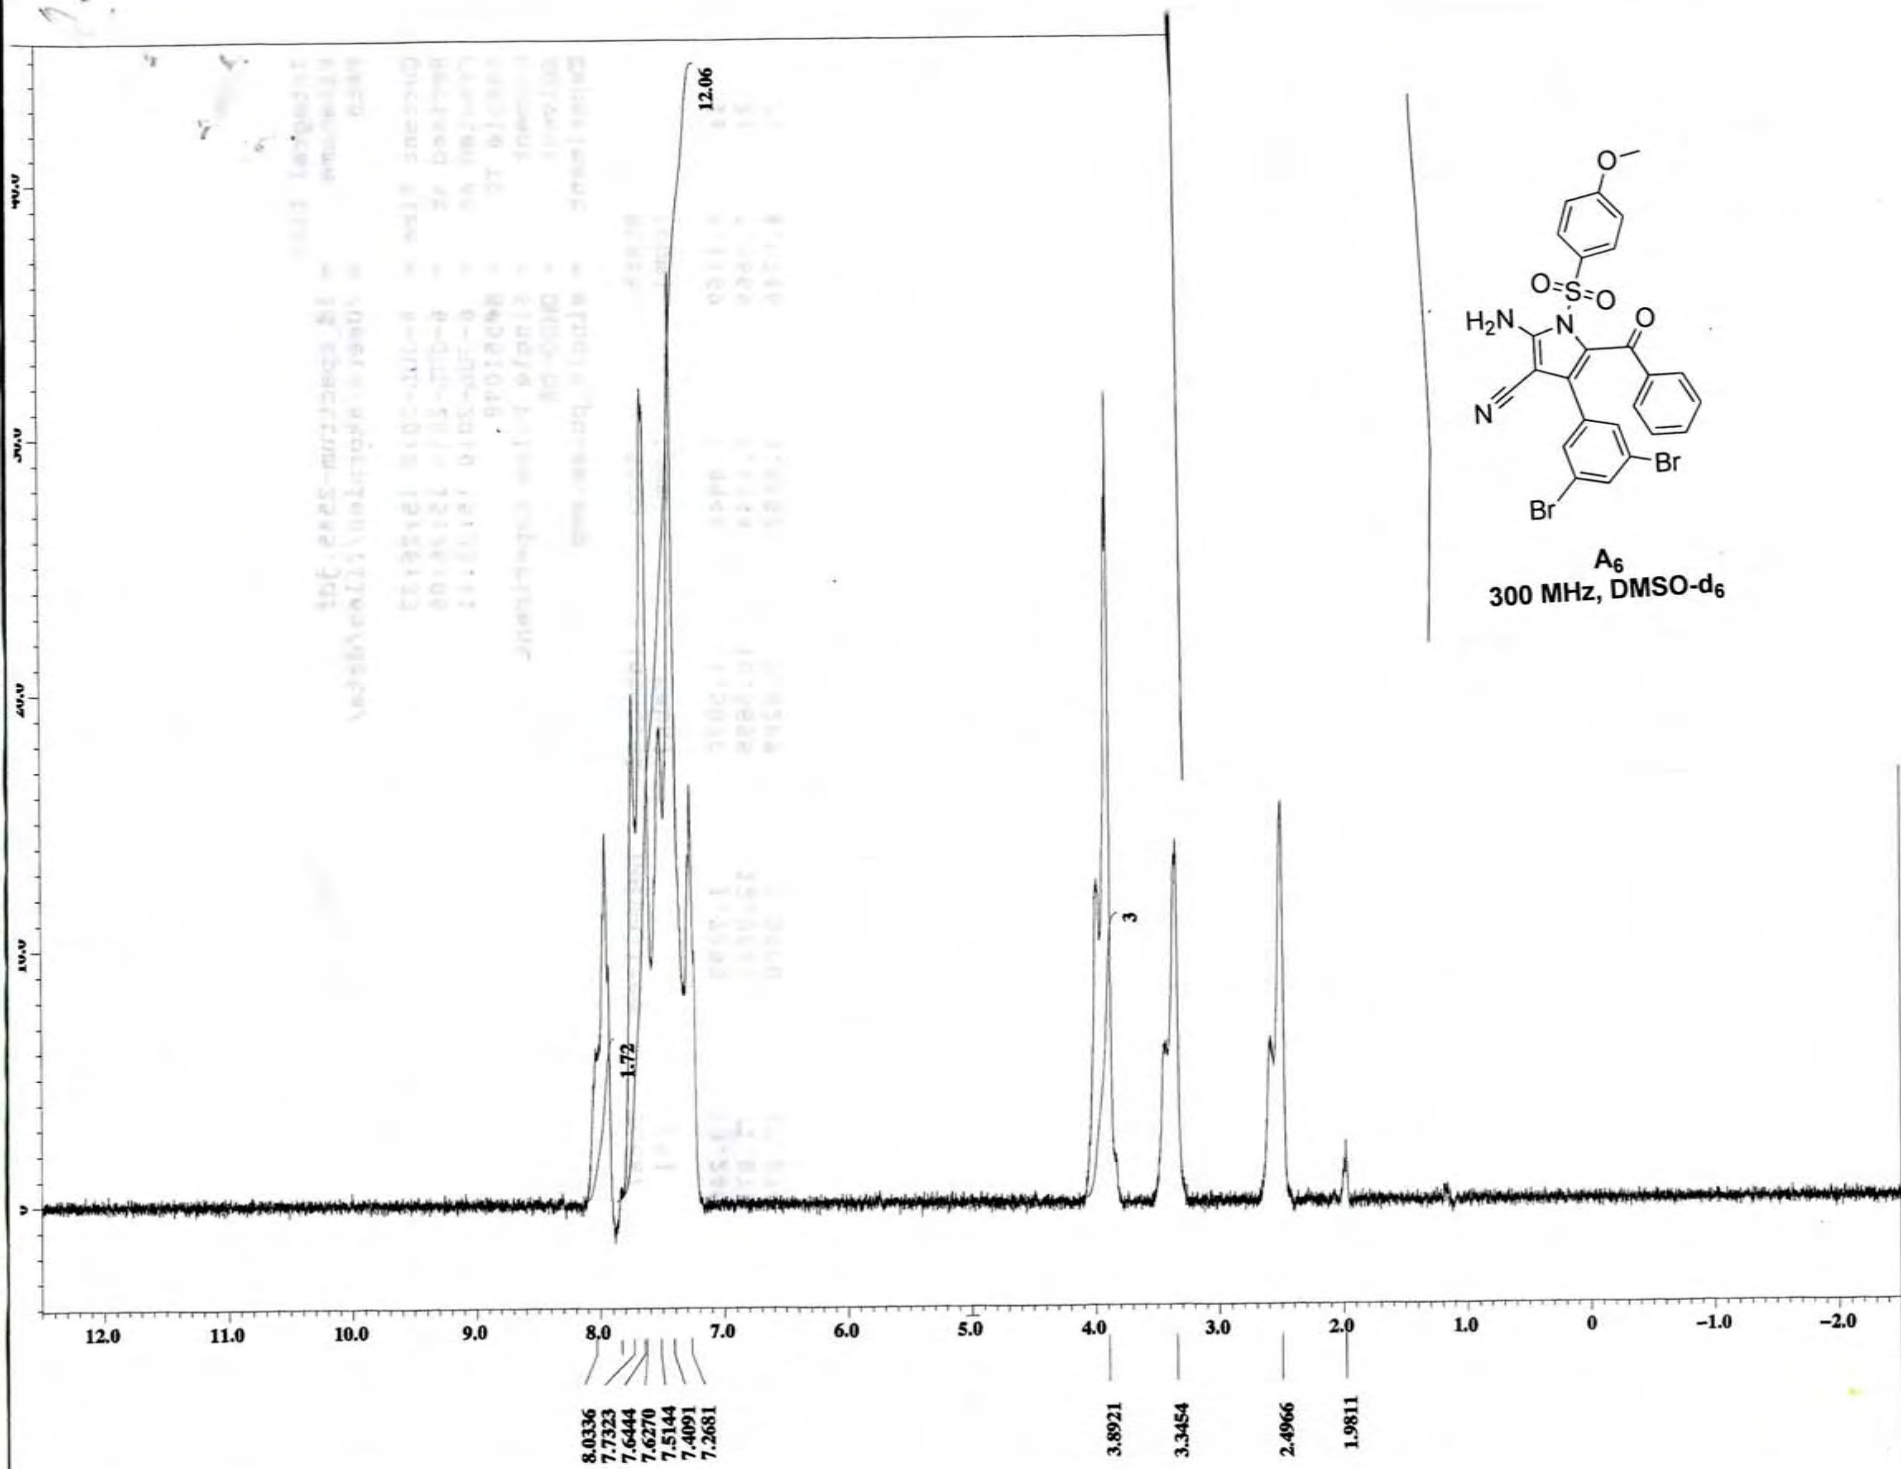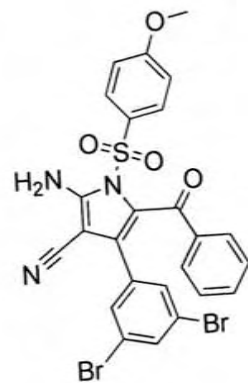

**A<sub>6</sub>**  
 300 MHz, DMSO-d<sub>6</sub>

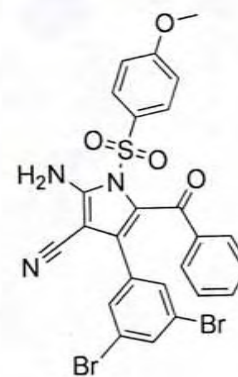

**A<sub>6</sub>**  
75 MHz, DMSO-d<sub>6</sub>

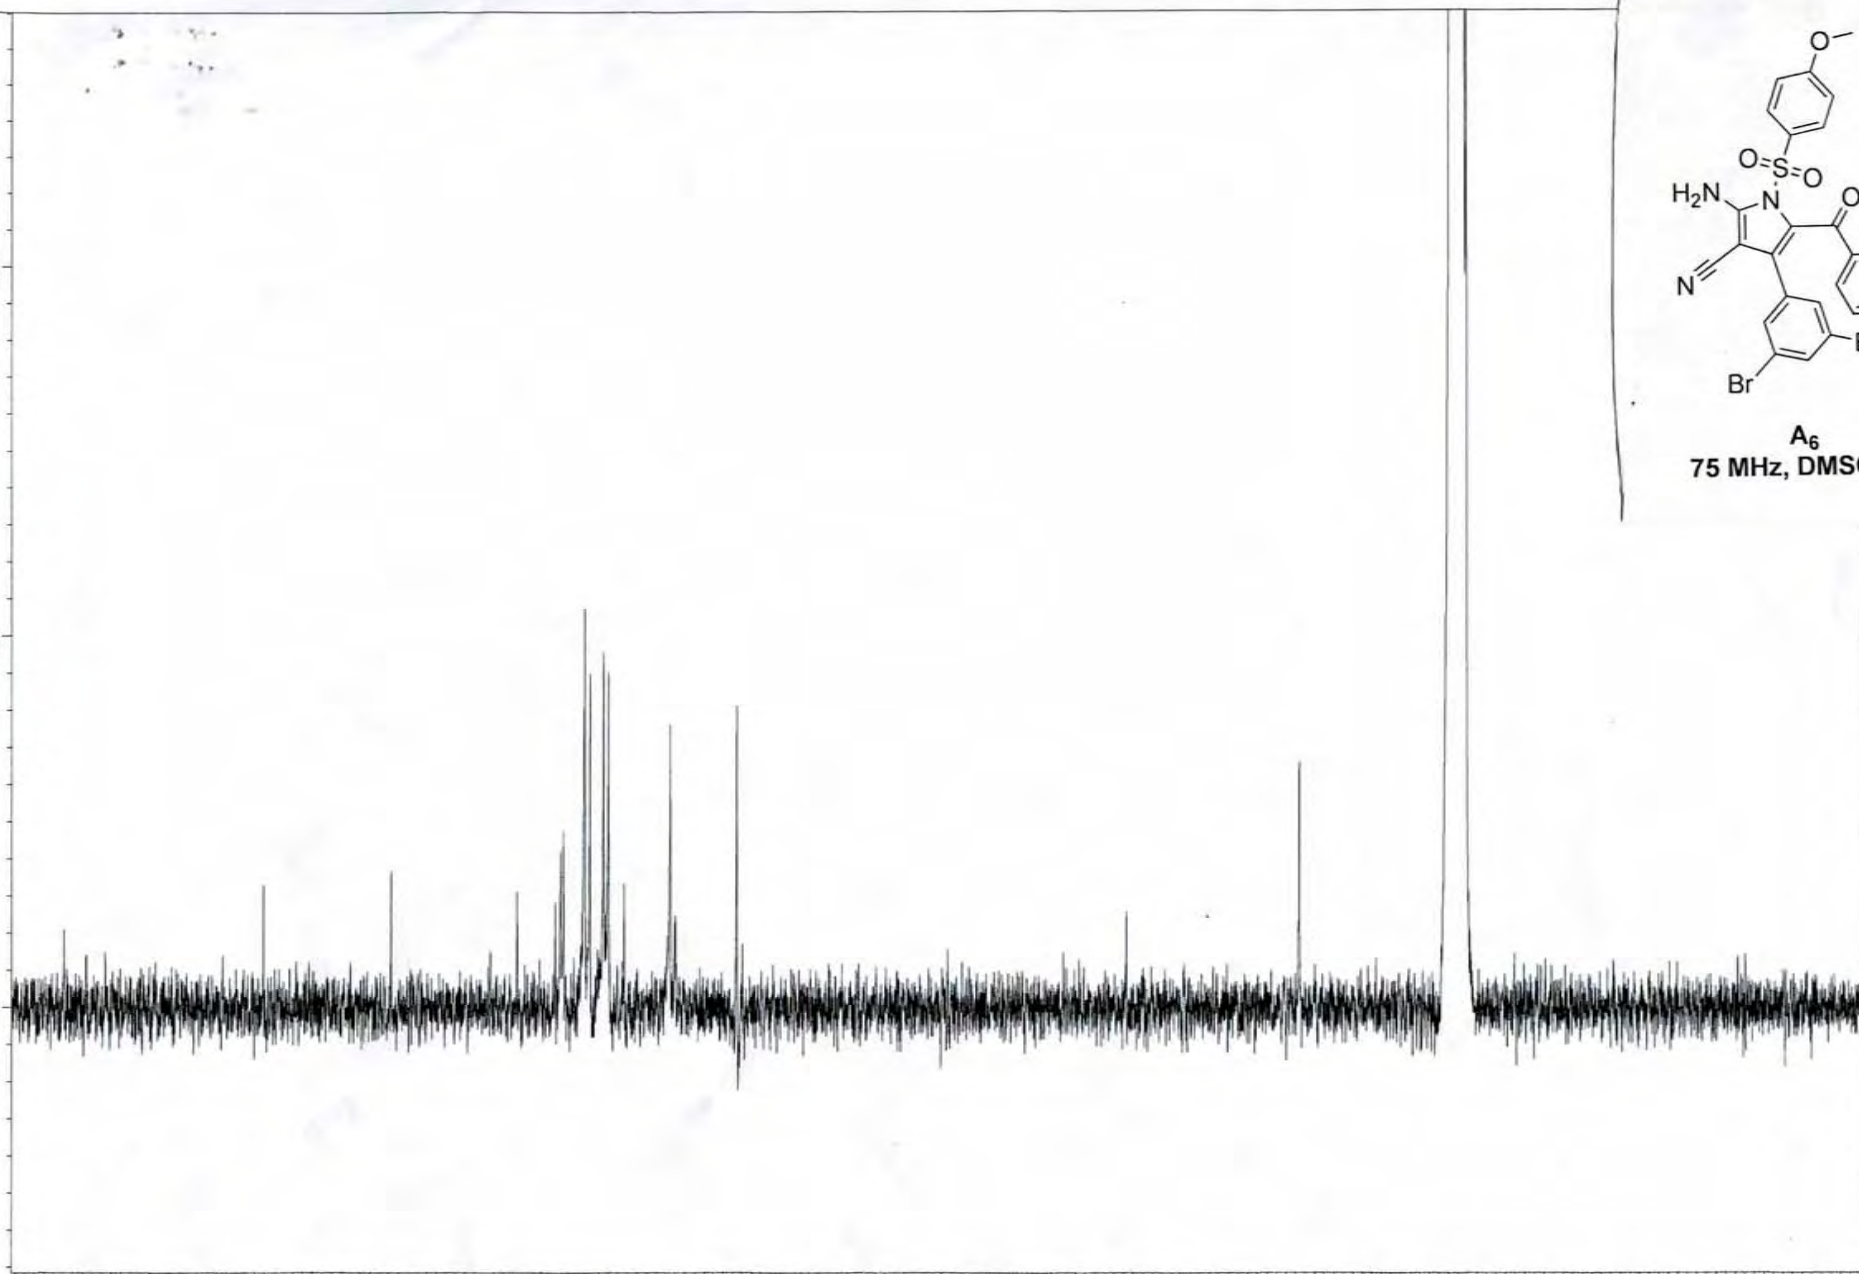

185.9365

165.1414

151.7741

138.5825

134.5746

134.0250

133.7372

131.7729

131.5057

130.9408

129.5438

129.0323

127.3833

122.5510

115.5887

74.7847

56.6844

40.6452

40.3628

40.0880

39.8131

X : parts per Million : 13C



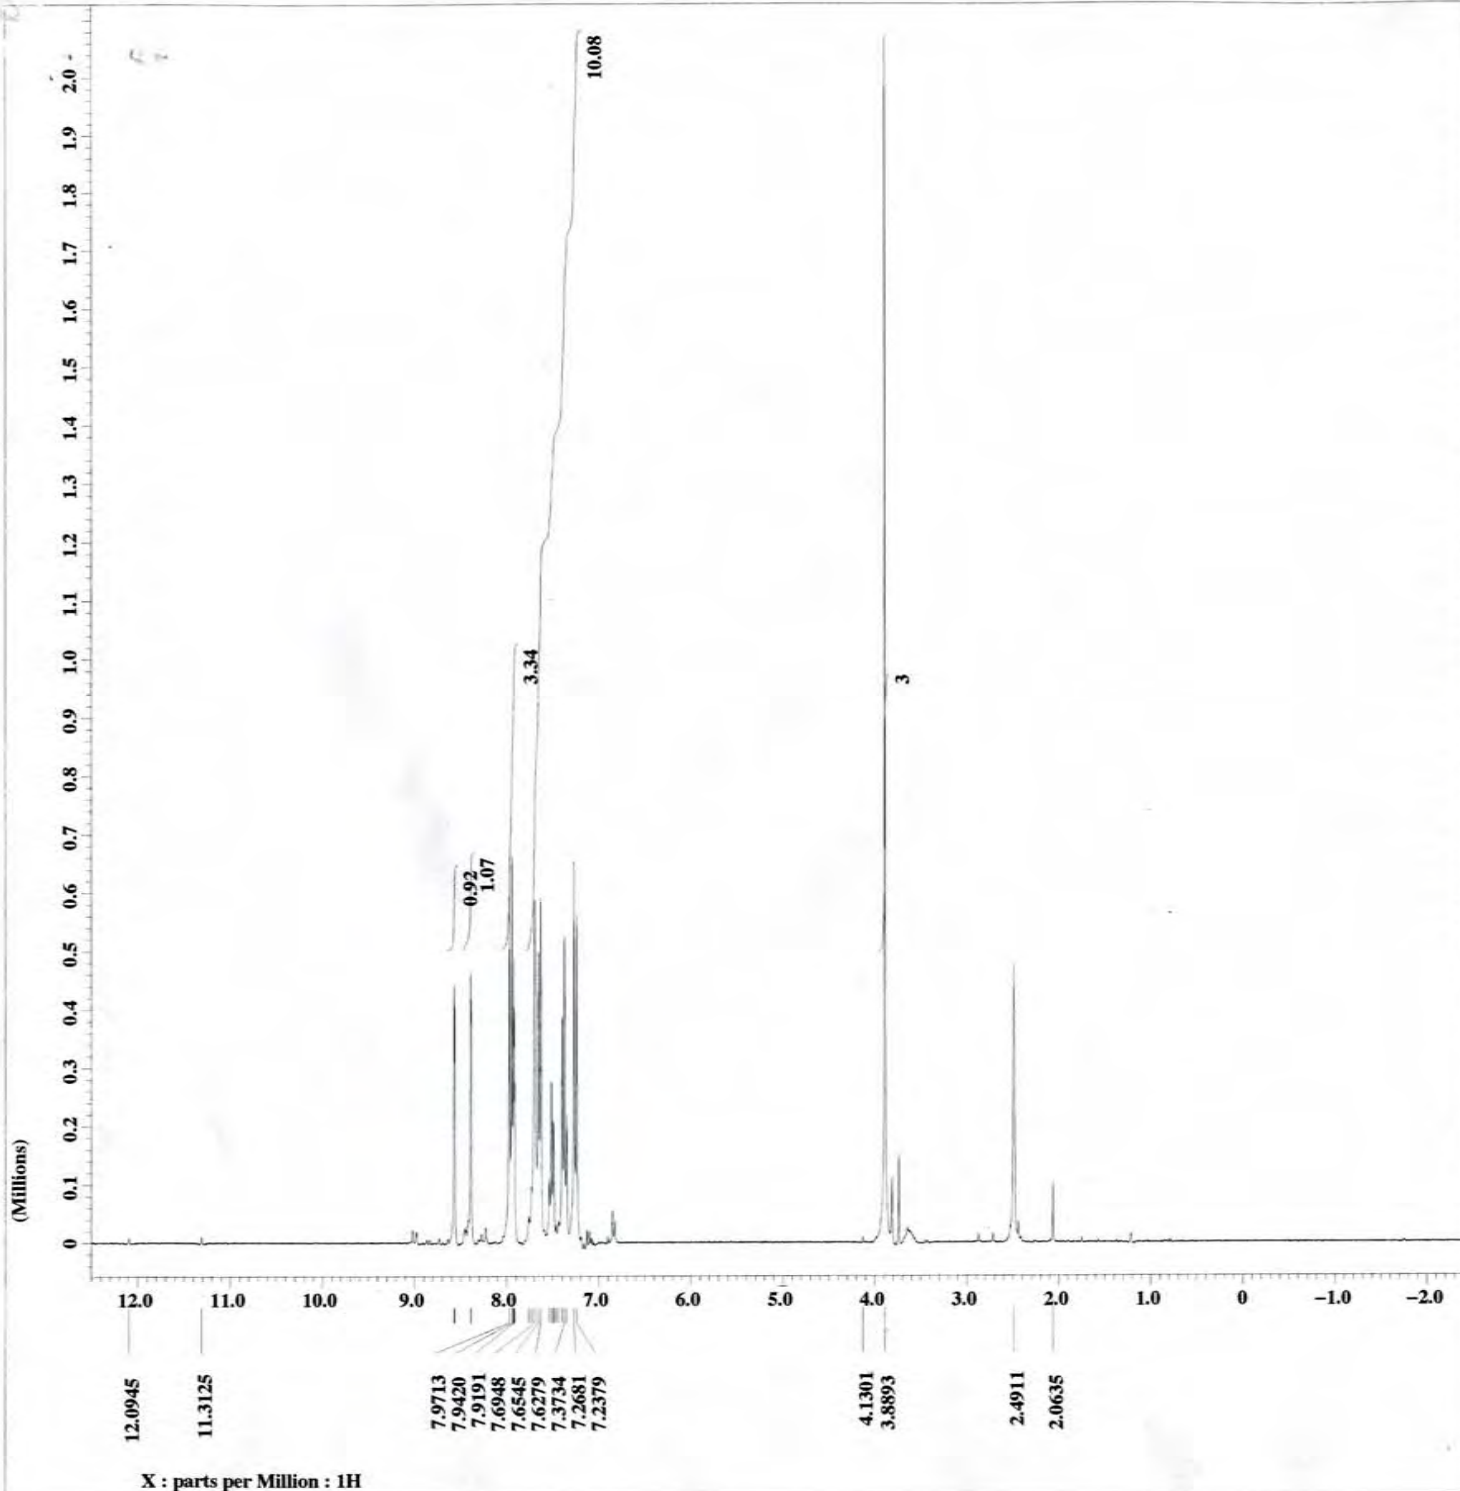

# JEOL

Filename = ld\_spectrum-148.jdf  
 Author = alex  
 Experiment = single\_pulse.exp  
 Sample\_id = S#500377  
 Solvent = DMSO-D6  
 Creation\_time = 11-DEC-2010 13:47:28  
 Revision\_time = 11-DEC-2010 14:06:20  
 Current\_time = 11-DEC-2010 14:06:27

Comment = Single Pulse Experime  
 Data\_format = 1D REAL  
 Dim\_size = 16384  
 Dim\_title = 1H  
 Dim\_units = [ppm]  
 Dimensions = X  
 Site = Eclipse+ 300  
 Spectrometer = DELTA\_NMR

Field\_strength = 7.0586013[T] (300[MHz]  
 X\_acq\_duration = 3.6339712[s]  
 X\_domain = 1H  
 X\_freq = 300.52965592[MHz]  
 X\_offset = 5[ppm]  
 X\_points = 16384  
 X\_prescans = 0  
 X\_resolution = 0.27518105[Hz]  
 X\_sweep = 4.50856628[kHz]  
 Clipped = FALSE  
 Mod\_return = 1  
 Scans = 8  
 Total\_scans = 8

X\_90\_width = 16[us]  
 X\_acq\_time = 3.6339712[s]  
 X\_angle = 45[deg]  
 X\_pulse = 8[us]  
 Initial\_wait = 1[s]  
 Phase\_preset = 3[us]  
 Recvr\_gain = 15  
 Relaxation\_delay = 4[s]  
 Temp\_get = 22.7[dC]  
 Un

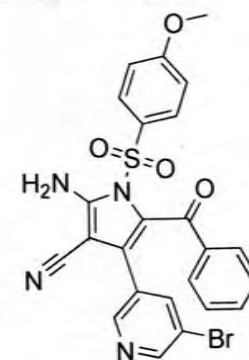

A<sub>7</sub>  
 300 MHz, DMSO-d<sub>6</sub>

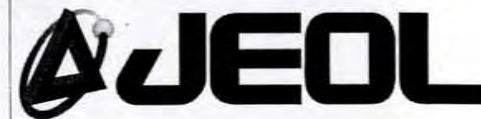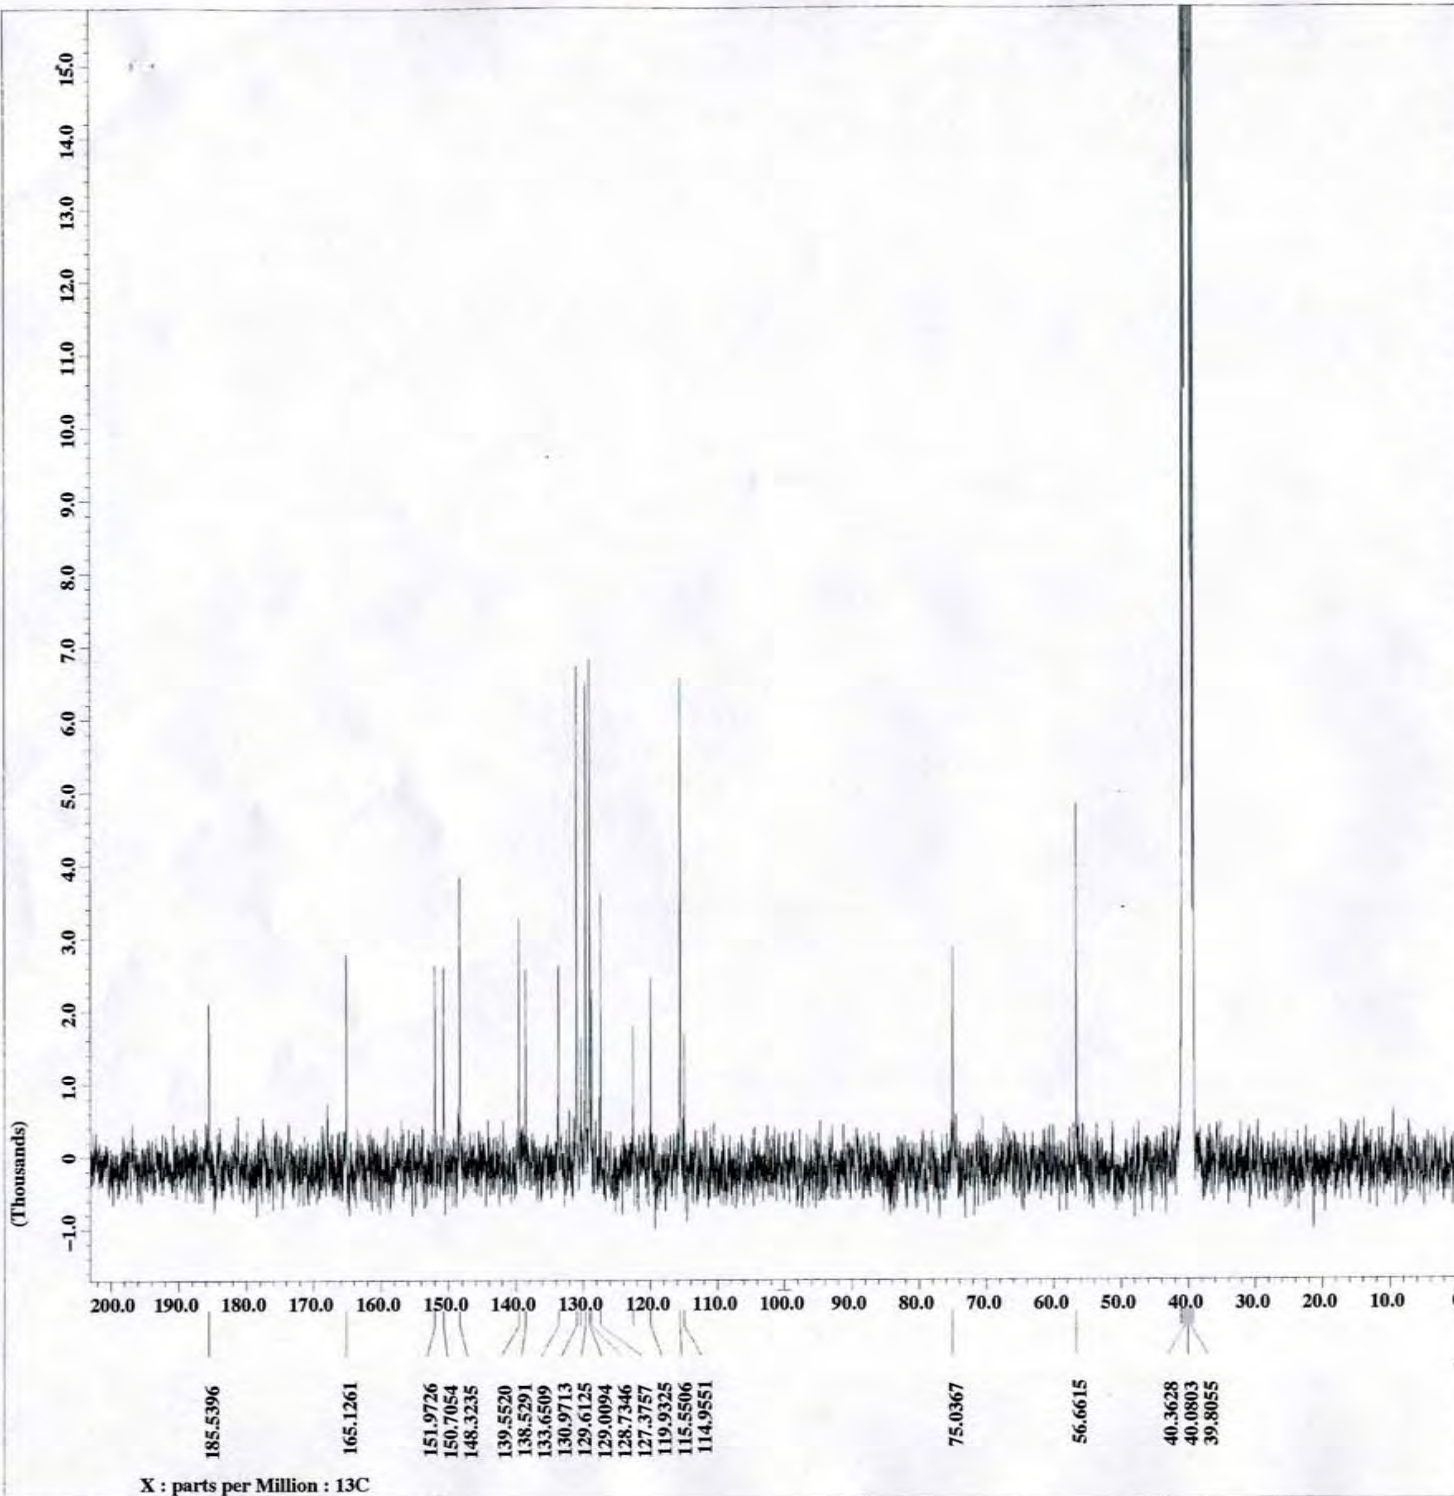

Filename = 1d\_13c\_spectrum-88.jd  
Author = alex  
Experiment = single\_pulse\_dec  
Sample\_id = S#535311  
Solvent = DMSO-D6  
Creation\_time = 11-DEC-2010 16:16:00  
Revision\_time = 11-DEC-2010 17:19:02  
Current\_time = 11-DEC-2010 17:19:14

Comment = Single Pulse with Bro  
Data\_format = 1D COMPLEX  
Dim\_size = 32768  
Dim\_title = 13C  
Dim\_units = [ppm]  
Dimensions = X  
Site = Eclipse+ 300  
Spectrometer = DELTA\_NMR

Field\_strength = 7.0586013[T] (300[MHz])  
X\_acq\_duration = 1.7334272[s]  
X\_domain = 13C  
X\_freq = 75.56823426[MHz]  
X\_offset = 100[ppm]  
X\_points = 32768  
X\_prescans = 4  
X\_resolution = 0.57689184[Hz]  
X\_sweep = 18.90359168[kHz]  
Irr\_domain = 1H  
Irr\_freq = 300.52965592[MHz]  
Irr\_offset = 5[ppm]  
Clipped = FALSE  
Mod\_return = 1  
Scans = 2000  
Total\_scans = 2000

X\_90\_width = 8.1[us]  
X\_acq\_time = 1.7334272[s]  
X\_angle = 30[deg]  
X\_pulse = 2.7[us]  
Initial\_wait = 1[s]  
Phase\_reset = 1

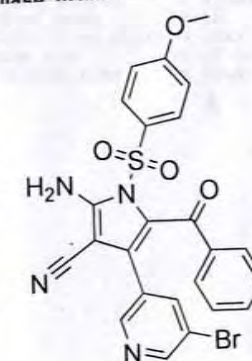

A<sub>7</sub>  
75 MHz, DMSO-d<sub>6</sub>



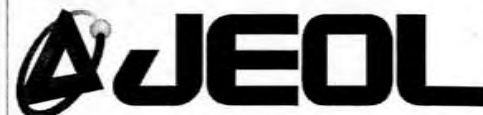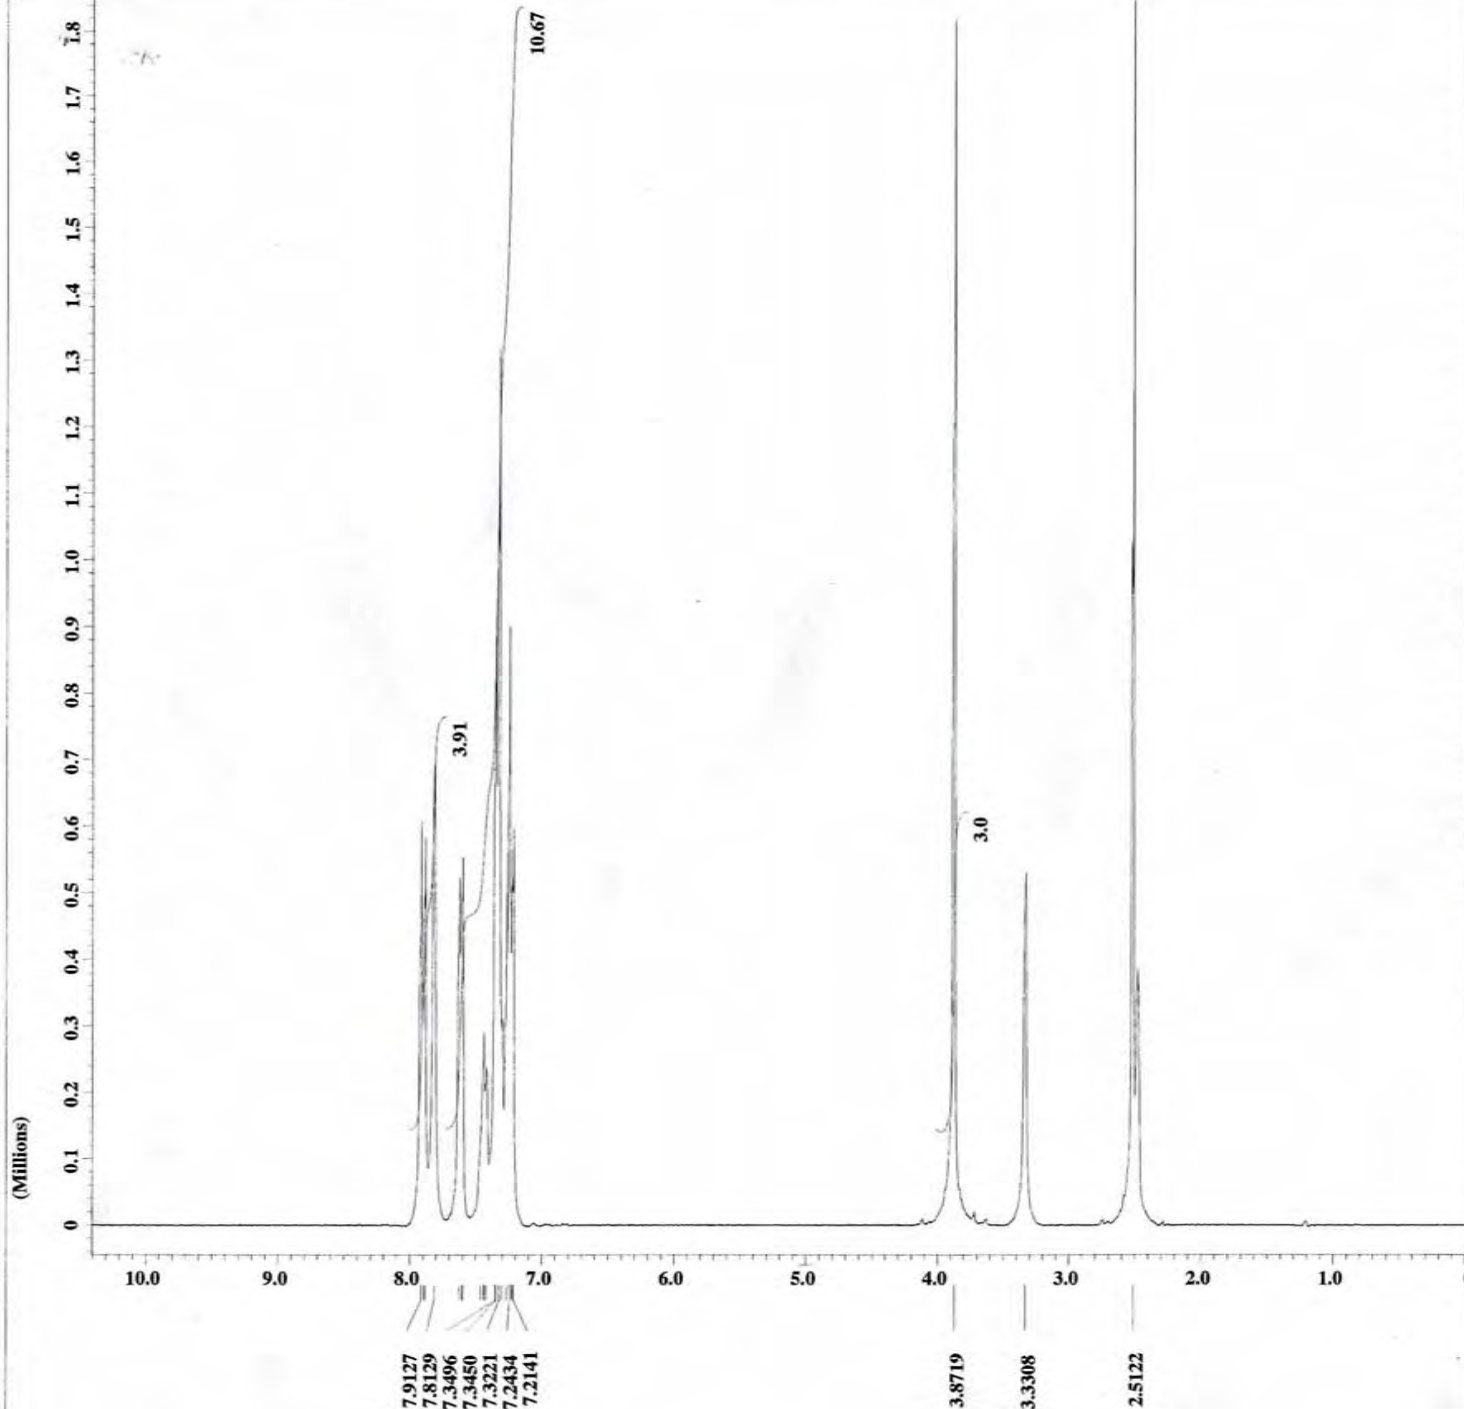

Filename = ld\_spectrum-134.jdf  
Author = alex  
Experiment = single\_pulse.exp  
Sample\_id = S#678091  
Solvent = DMSO-D6  
Creation\_time = 9-DEC-2010 18:43:42  
Revision\_time = 9-DEC-2010 19:32:05  
Current\_time = 9-DEC-2010 19:32:23

Comment = Single Pulse Experime  
Data\_format = 1D REAL  
Dim\_size = 16384  
Dim\_title = 1H  
Dim\_units = [ppm]  
Dimensions = X  
Site = Eclipse+ 300  
Spectrometer = DELTA\_NMR

Field\_strength = 7.0586013[T] (300[MHz])  
X\_acq\_duration = 3.6339712[s]  
X\_domain = 1H  
X\_freq = 300.52965592[MHz]  
X\_offset = 5[ppm]  
X\_points = 16384  
X\_prescans = 0  
X\_resolution = 0.27518105[Hz]  
X\_sweep = 4.50856628[kHz]  
Clipped = FALSE  
Mod\_return = 1  
Scans = 8  
Total\_scans = 8

X\_90\_width = 16[us]  
X\_acq\_time = 3.6339712[s]  
X\_angle = 45[deg]  
X\_pulse = 8[us]  
Initial\_wait = 1[s]  
Phase\_preset = 3[us]  
Recvr\_gain = 15  
Relaxation\_delay = 4[s]  
Temp\_get = 23.2[dC]  
Un

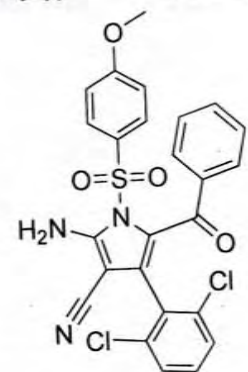

A<sub>8</sub>  
300 MHz, DMSO-d<sub>6</sub>

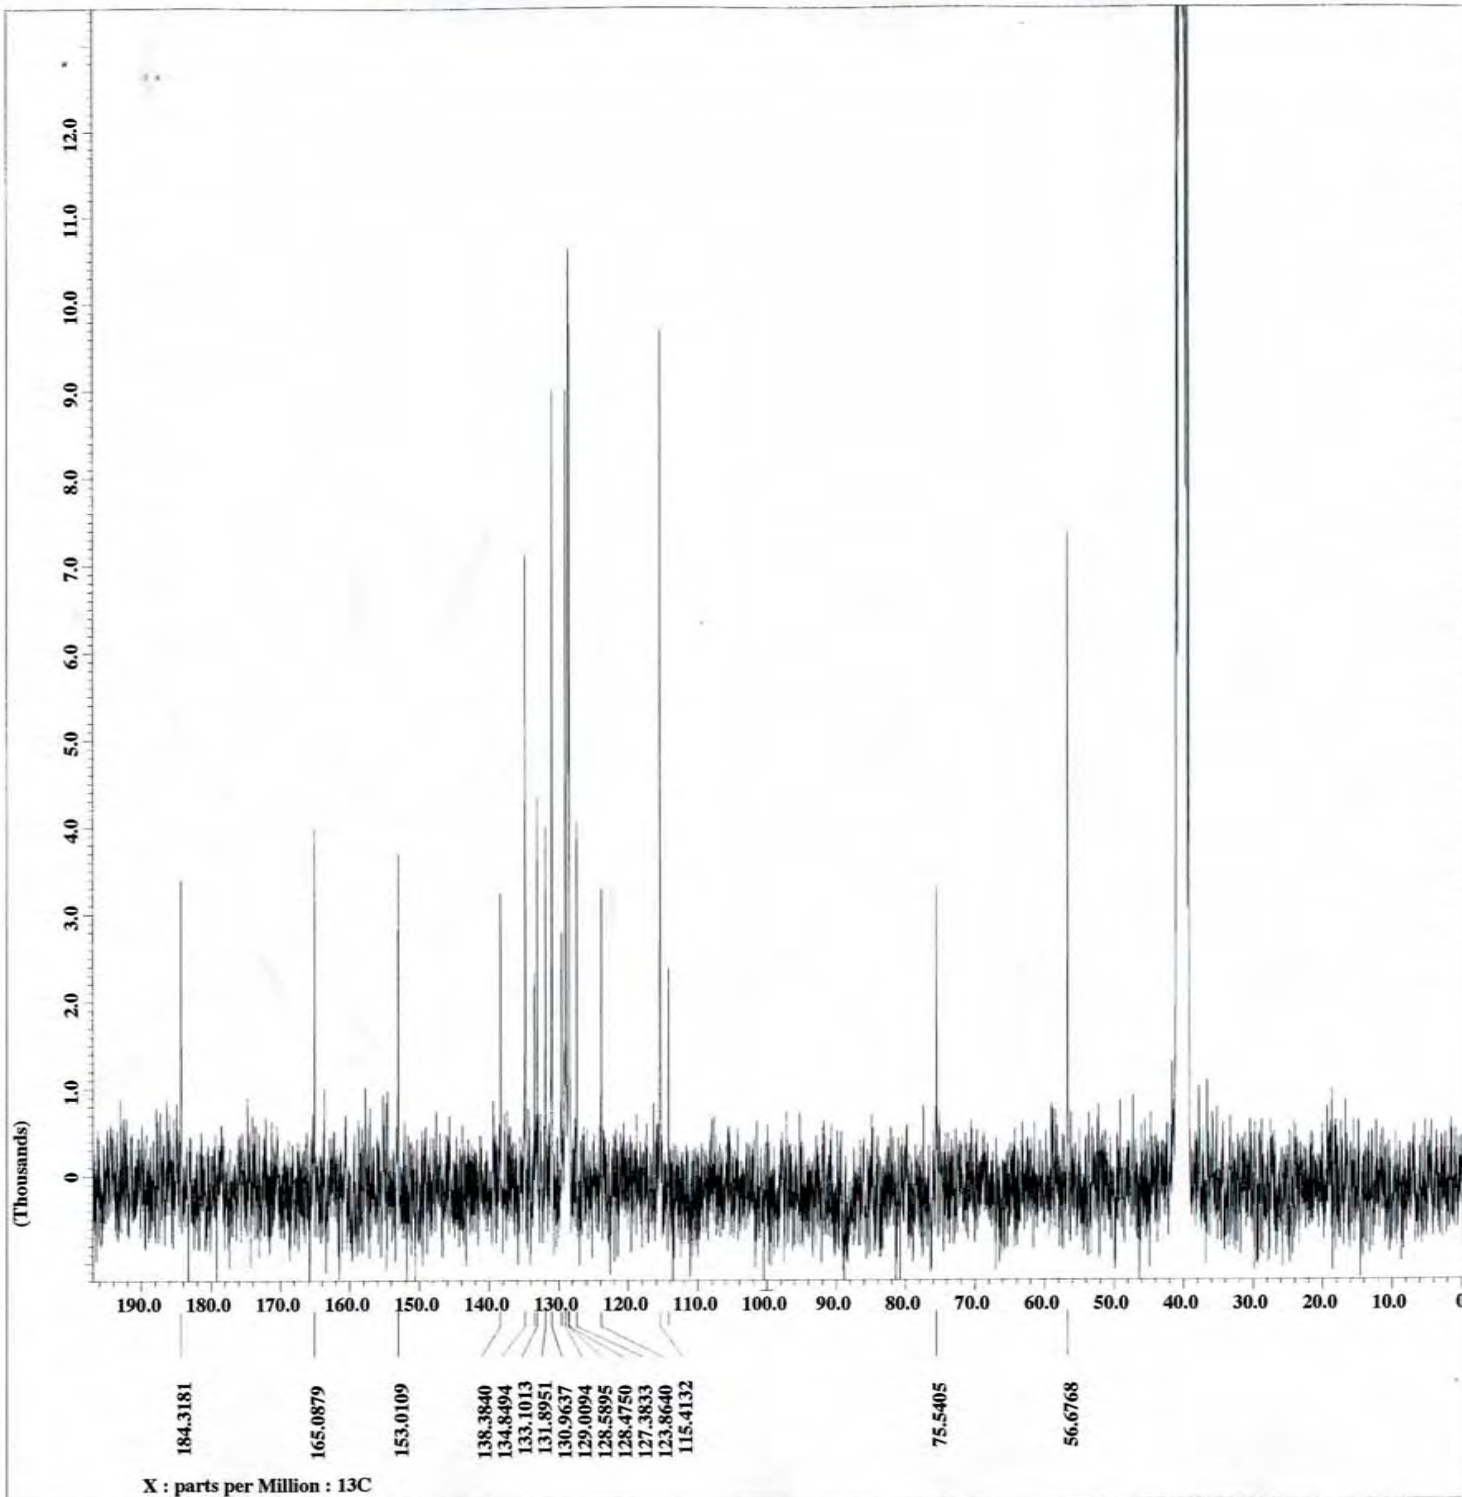

Filename = ld\_13c\_spectrum-73.jd  
 Author = alex  
 Experiment = single\_pulse\_dec  
 Sample\_id = S#679231  
 Solvent = DMSO-D6  
 Creation\_time = 9-DEC-2010 19:30:20  
 Revision\_time = 9-DEC-2010 19:43:29  
 Current\_time = 9-DEC-2010 19:43:34

Comment = Single Pulse with Bro  
 Data\_format = 1D\_COMPLEX  
 Dim\_size = 32768  
 Dim\_title = 13C  
 Dim\_units = [ppm]  
 Dimensions = X  
 Site = Eclipse+ 300  
 Spectrometer = DELTA\_NMR

Field\_strength = 7.0586013[T] (300[MHz]  
 X\_acq\_duration = 1.7334272[s]  
 X\_domain = 13C  
 X\_freq = 75.56823426[MHz]  
 X\_offset = 100[ppm]  
 X\_points = 32768  
 X\_prescans = 4  
 X\_resolution = 0.57689184[Hz]  
 X\_sweep = 18.90359168[kHz]  
 Irr\_domain = 1H  
 Irr\_freq = 300.52965592[MHz]  
 Irr\_offset = 5[ppm]  
 Clipped = FALSE  
 Mod\_return = 1  
 Scans = 1000  
 Total\_scans = 1000

X\_90\_width = 8.1[us]  
 X\_acq\_time = 1.7334272[s]  
 X\_angle = 30[deg]  
 X\_pulse = 2.7[us]  
 Initial\_wait = 1[s]  
 Phase\_preset = 3[us]  
 Recvr\_gain = 15  
 Relaxation\_delay = 1[s]

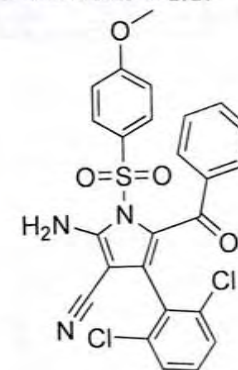

A<sub>8</sub>  
 75 MHz, DMSO-d<sub>6</sub>

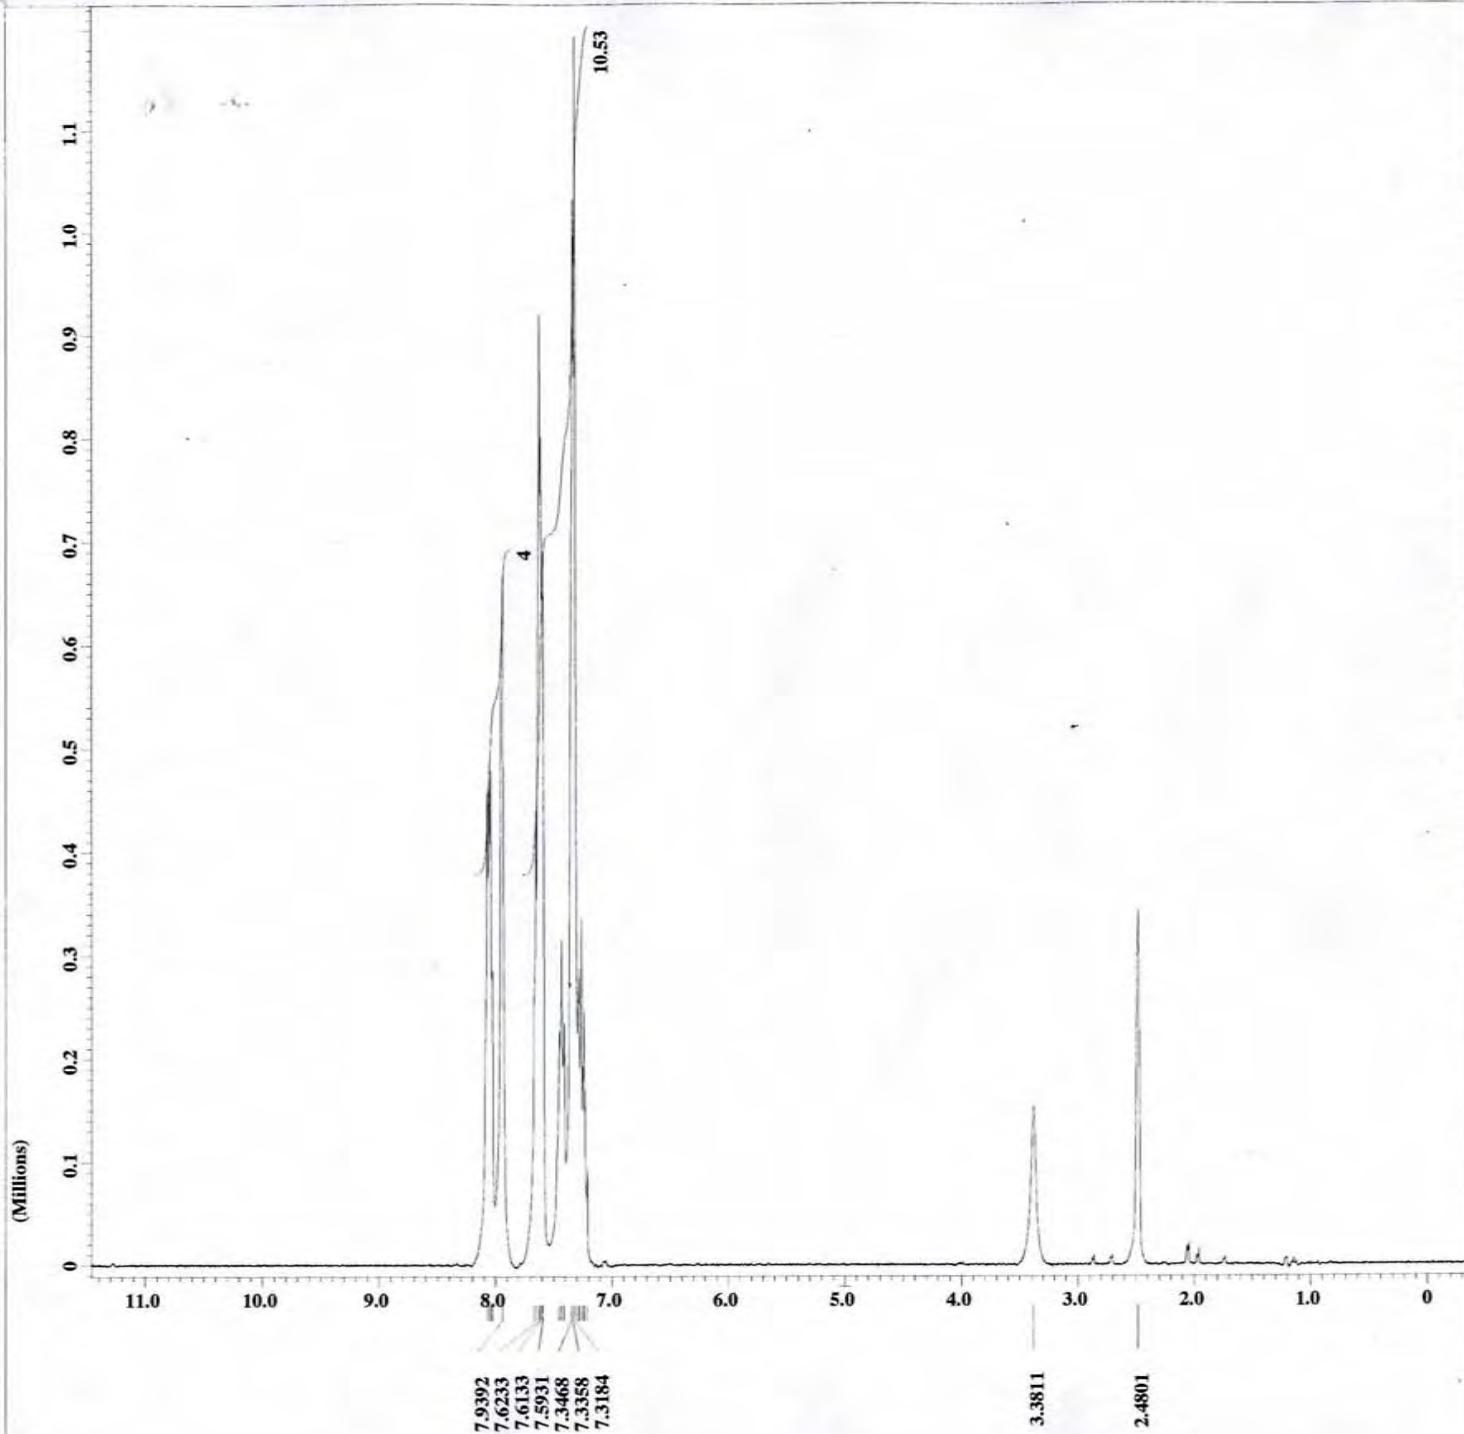

# JEOL

Filename = 1d\_spectrum-123.jdf  
 Author = alex  
 Experiment = single\_pulse.exp  
 Sample\_id = S#454507  
 Solvent = DMSO-D6  
 Creation\_time = 9-DEC-2010 12:31:02  
 Revision\_time = 9-DEC-2010 14:49:46  
 Current\_time = 9-DEC-2010 14:49:57

Comment = Single Pulse Experime  
 Data\_format = 1D REAL  
 Dim\_size = 16384  
 Dim\_title = 1H  
 Dim\_units = [ppm]  
 Dimensions = X  
 Site = Eclipse+ 300  
 Spectrometer = DELTA\_NMR

Field\_strength = 7.0586013[T] (300[MHz])  
 X\_acq\_duration = 3.6339712[s]  
 X\_domain = 1H  
 X\_freq = 300.52965592[MHz]  
 X\_offset = 5[ppm]  
 X\_points = 16384  
 X\_prescans = 0  
 X\_resolution = 0.27518105[Hz]  
 X\_sweep = 4.50856628[kHz]  
 Clipped = FALSE  
 Mod\_return = 1  
 Scans = 8  
 Total\_scans = 8

X\_90\_width = 16[us]  
 X\_acq\_time = 3.6339712[s]  
 X\_angle = 45[deg]  
 X\_pulse = 8[us]  
 Initial\_wait = 1[s]  
 Phase\_preset = 3[us]  
 Recvr\_gain = 15  
 Relaxation\_delay = 4[s]  
 Temp\_get = 22.6[dC]  
 Unblank\_time = 2[us]

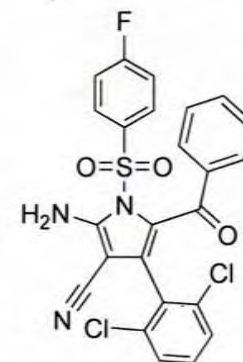

**A<sub>9</sub>**  
 300 MHz, DMSO-d<sub>6</sub>



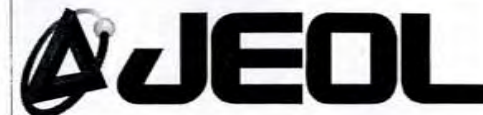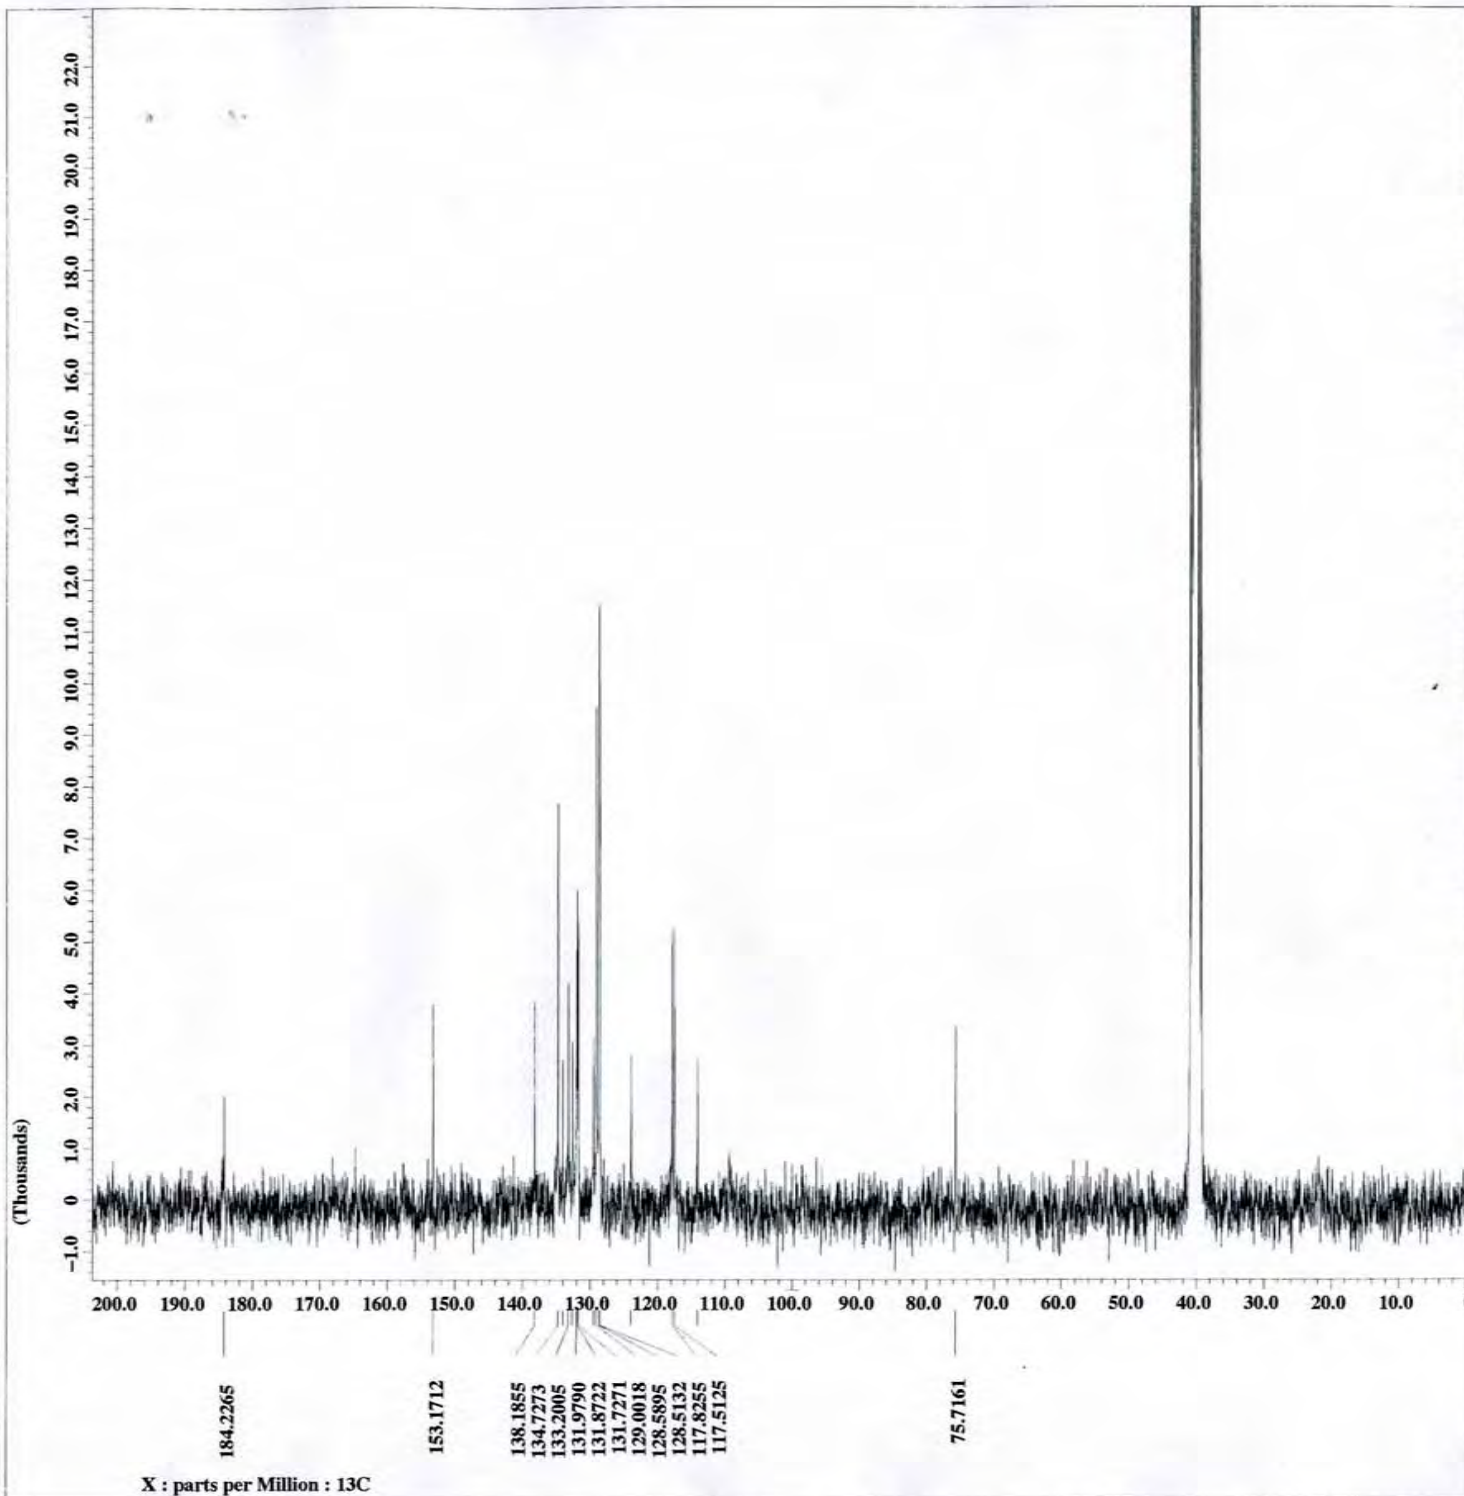

Filename = 1d\_13c\_spectrum-70.jd  
Author = alex  
Experiment = single\_pulse\_dec  
Sample\_id = S#455639  
Solvent = DMSO-D6  
Creation\_time = 9-DEC-2010 13:26:47  
Revision\_time = 9-DEC-2010 14:40:14  
Current\_time = 9-DEC-2010 14:40:33

Comment = Single Pulse with Bro  
Data\_format = 1D\_COMPLEX  
Dim\_size = 32768  
Dim\_title = 13C  
Dim\_units = [ppm]  
Dimensions = X  
Site = Eclipse+ 300  
Spectrometer = DELTA\_NMR

Field\_strength = 7.0586013[T] (300[MHz])  
X\_acq\_duration = 1.7334272[s]  
X\_domain = 13C  
X\_freq = 75.56823426[MHz]  
X\_offset = 100[ppm]  
X\_points = 32768  
X\_prescans = 4  
X\_resolution = 0.57689184[Hz]  
X\_sweep = 18.90359168[kHz]  
Irr\_domain = 1H  
Irr\_freq = 300.52965592[MHz]  
Irr\_offset = 5[ppm]  
Clipped = FALSE  
Mod\_return = 1  
Scans = 1200  
Total\_scans = 1200

X\_90\_width = 8.1[us]  
X\_acq\_time = 1.7334272[s]  
X\_angle = 30[deg]  
X\_pulse = 2.7[us]  
Initial\_wait = 1[s]  
Phase\_preset = 3[us]  
Recvr\_gain = 15  
Relaxation\_delay = 1[s]  
Temp\_get = 23.8[dC]

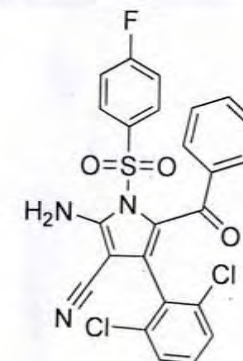

A<sub>9</sub>  
75 MHz, DMSO-d<sub>6</sub>

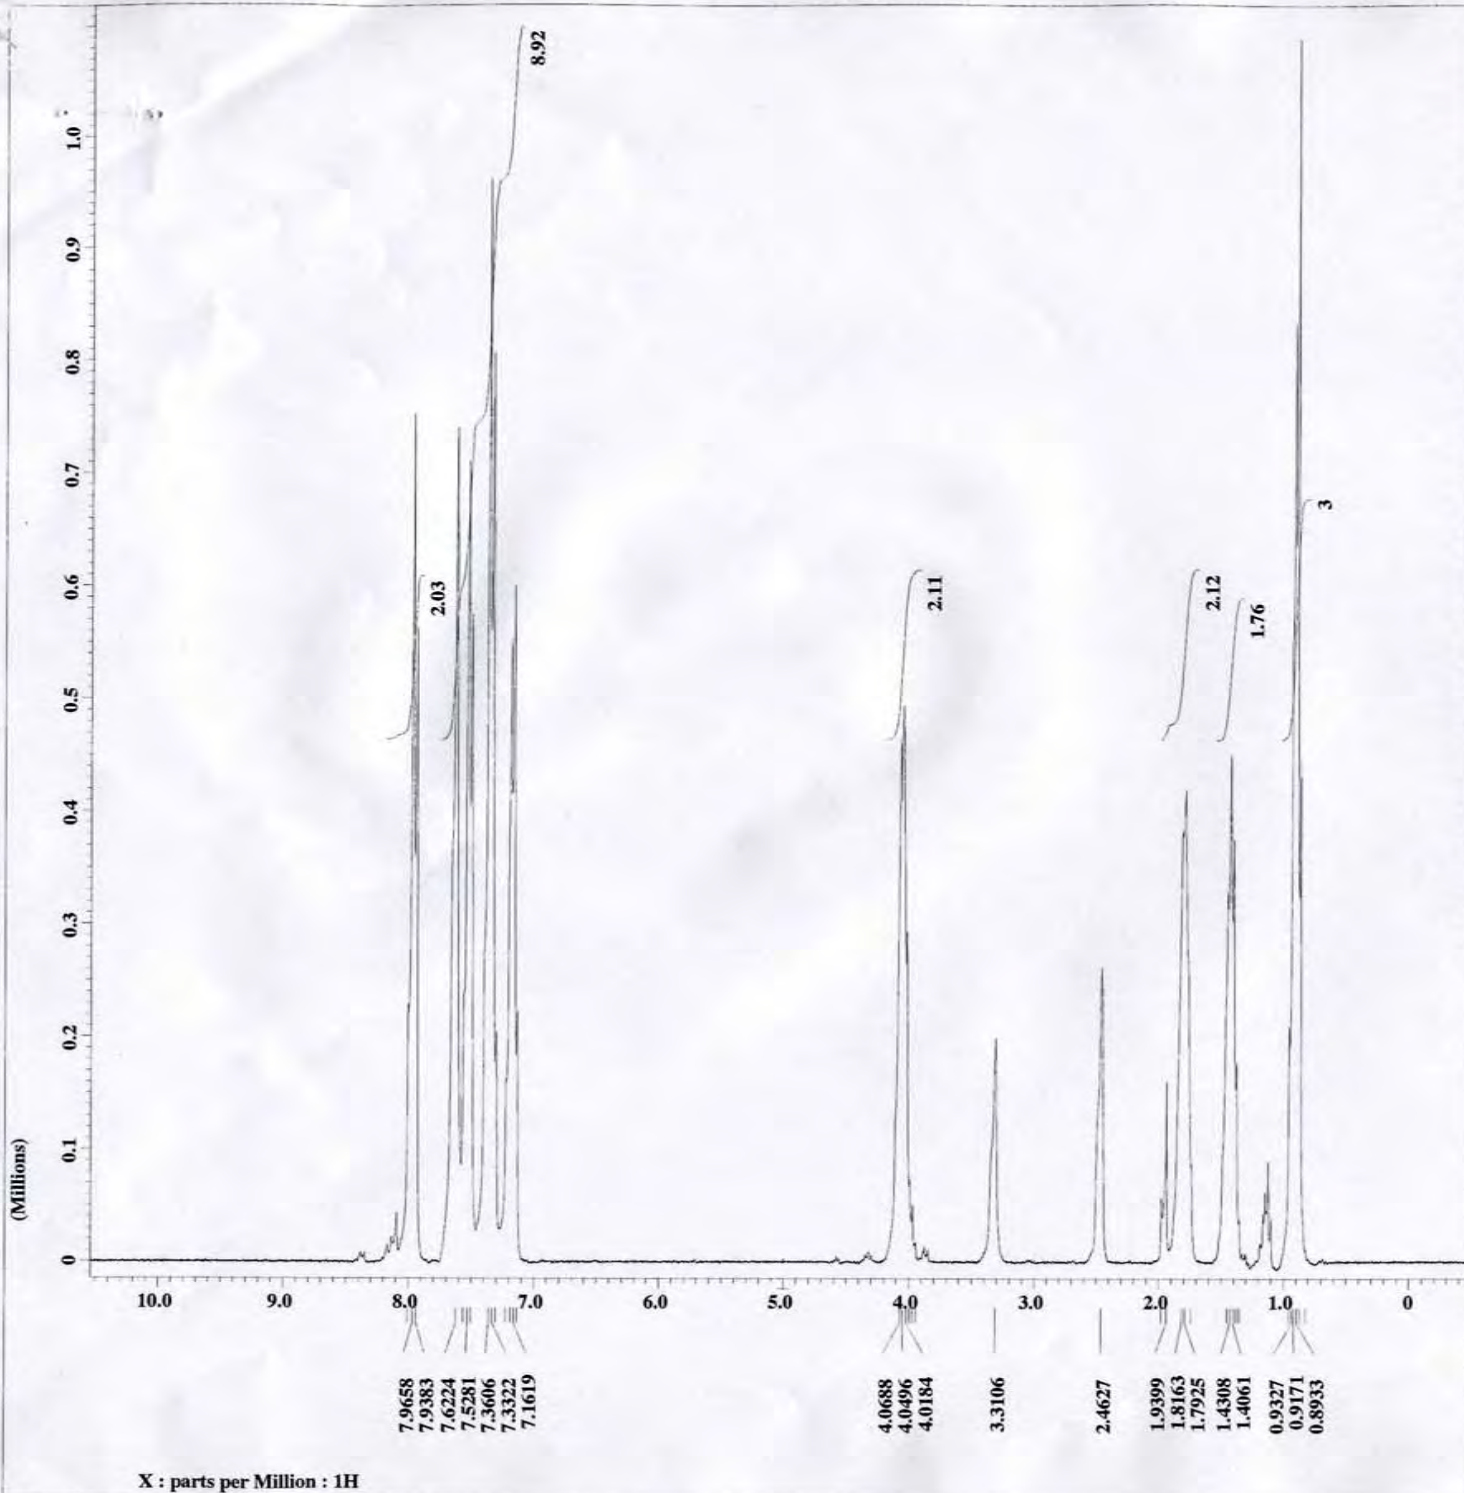

# JEOL

Filename = id\_spectrum-118.jdf  
 Author = alex  
 Experiment = single\_pulse.exp  
 Sample id = S#414169  
 Solvent = DMSO-D6  
 Creation time = 9-DEC-2010 11:23:49  
 Revision time = 9-DEC-2010 12:35:01  
 Current time = 9-DEC-2010 12:35:15

Comment = Single Pulse Experime  
 Data format = 1D REAL  
 Dim size = 16384  
 Dim title = 1H  
 Dim units = [ppm]  
 Dimensions = X  
 Site = Eclipse+ 300  
 Spectrometer = DELTA\_NMR

Field strength = 7.0586013[T] (300[MHz]  
 X\_acq\_duration = 3.6339712[s]  
 X\_domain = 1H  
 X\_freq = 300.52965592[MHz]  
 X\_offset = 5[ppm]  
 X\_points = 16384  
 X\_prescans = 0  
 X\_resolution = 0.27518105[Hz]  
 X\_sweep = 4.50856628[kHz]  
 Clipped = FALSE  
 Mod\_return = 1  
 Scans = 8  
 Total\_scans = 8

X\_90\_width = 16[us]  
 X\_acq\_time = 3.6339712[s]  
 X\_angle = 45[deg]  
 X\_pulse = 8[us]  
 Initial wait = 1[s]  
 Phase\_preset = 3[us]  
 Recvr\_gain = 15  
 Relaxation\_delay = 4[s]  
 Temp\_get = 22.1[dC]  
 Unblank\_time = 2[us]

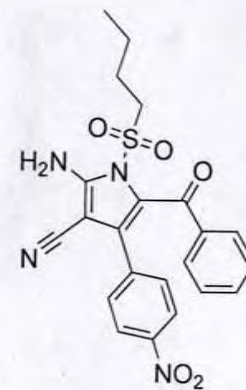

A10  
 300 MHz, DMSO-d<sub>6</sub>



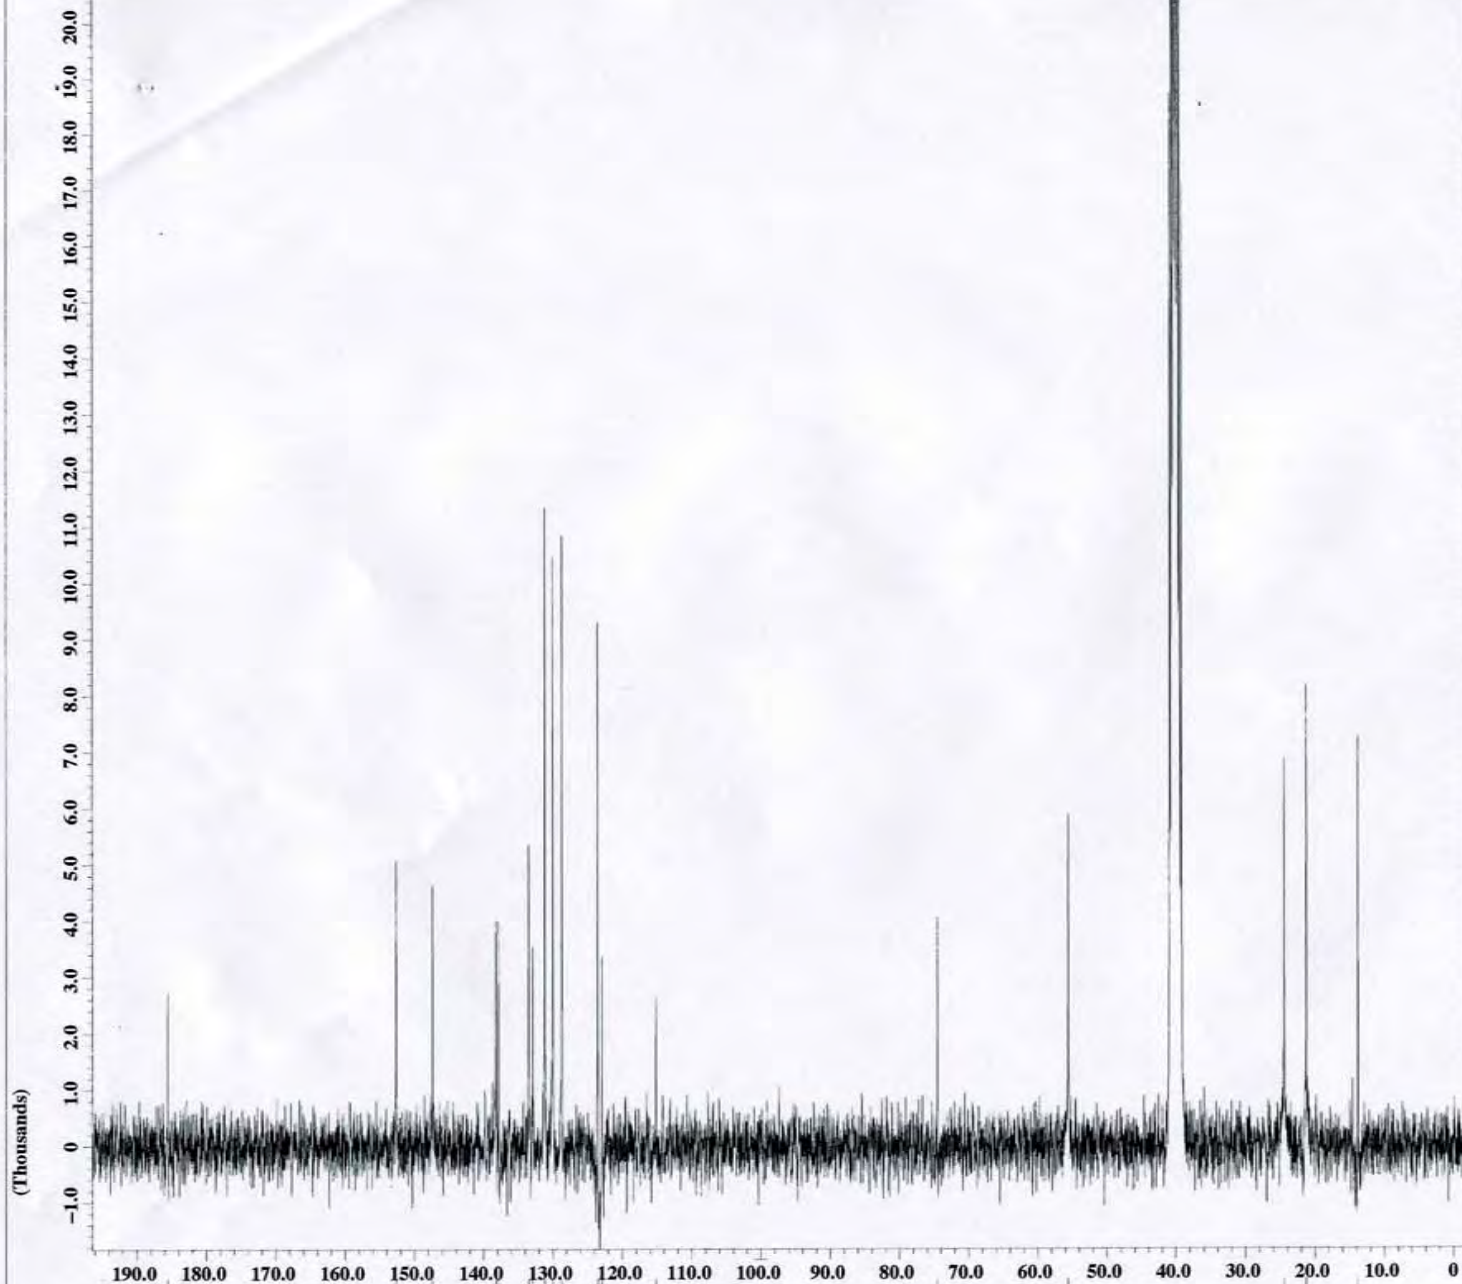

Filename = 1d\_13c\_spectrum-69.jd  
 Author = alex  
 Experiment = single\_pulse\_dec  
 Sample\_id = S#416841  
 Solvent = DMSO-D6  
 Creation\_time = 9-DEC-2010 12:12:58  
 Revision\_time = 9-DEC-2010 12:27:31  
 Current\_time = 9-DEC-2010 12:27:35

Comment = Single Pulse with Bro  
 Data\_format = 1D\_REAL  
 Dim\_size = 32768  
 Dim\_title = 13C  
 Dim\_units = [ppm]  
 Dimensions = X  
 Site = Eclipse+ 300  
 Spectrometer = DELTA\_NMR

Field\_strength = 7.0586013[T] (300[MHz])  
 X\_acq\_duration = 1.7334272[s]  
 X\_domain = 13C  
 X\_freq = 75.56823426[MHz]  
 X\_offset = 100[ppm]  
 X\_points = 32768  
 X\_prescans = 4  
 X\_resolution = 0.57689184[Hz]  
 X\_sweep = 18.90359168[kHz]  
 Irr\_domain = 1H  
 Irr\_freq = 300.52965592[MHz]  
 Irr\_offset = 5[ppm]  
 Clipped = FALSE  
 Mod\_return = 1  
 Scans = 1000  
 Total\_scans = 1000

X\_90\_width = 8.1[us]  
 X\_acq\_time = 1.7334272[s]  
 X\_angle = 30[deg]  
 X\_pulse = 2.7[us]  
 Initial\_wait = 1[s]  
 Phase\_preset = 3[us]

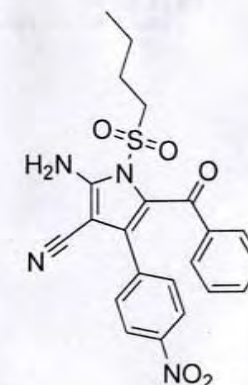

A<sub>10</sub>  
 75 MHz, DMSO-d<sub>6</sub>

185.5930  
 152.6368  
 147.3998  
 138.2008  
 137.8496  
 133.4830  
 132.9180  
 131.1317  
 129.9789  
 128.6659  
 123.5205  
 122.9174  
 115.1612

74.5175

55.5851

24.4534  
21.2319

13.8345

X : parts per Million : 13C

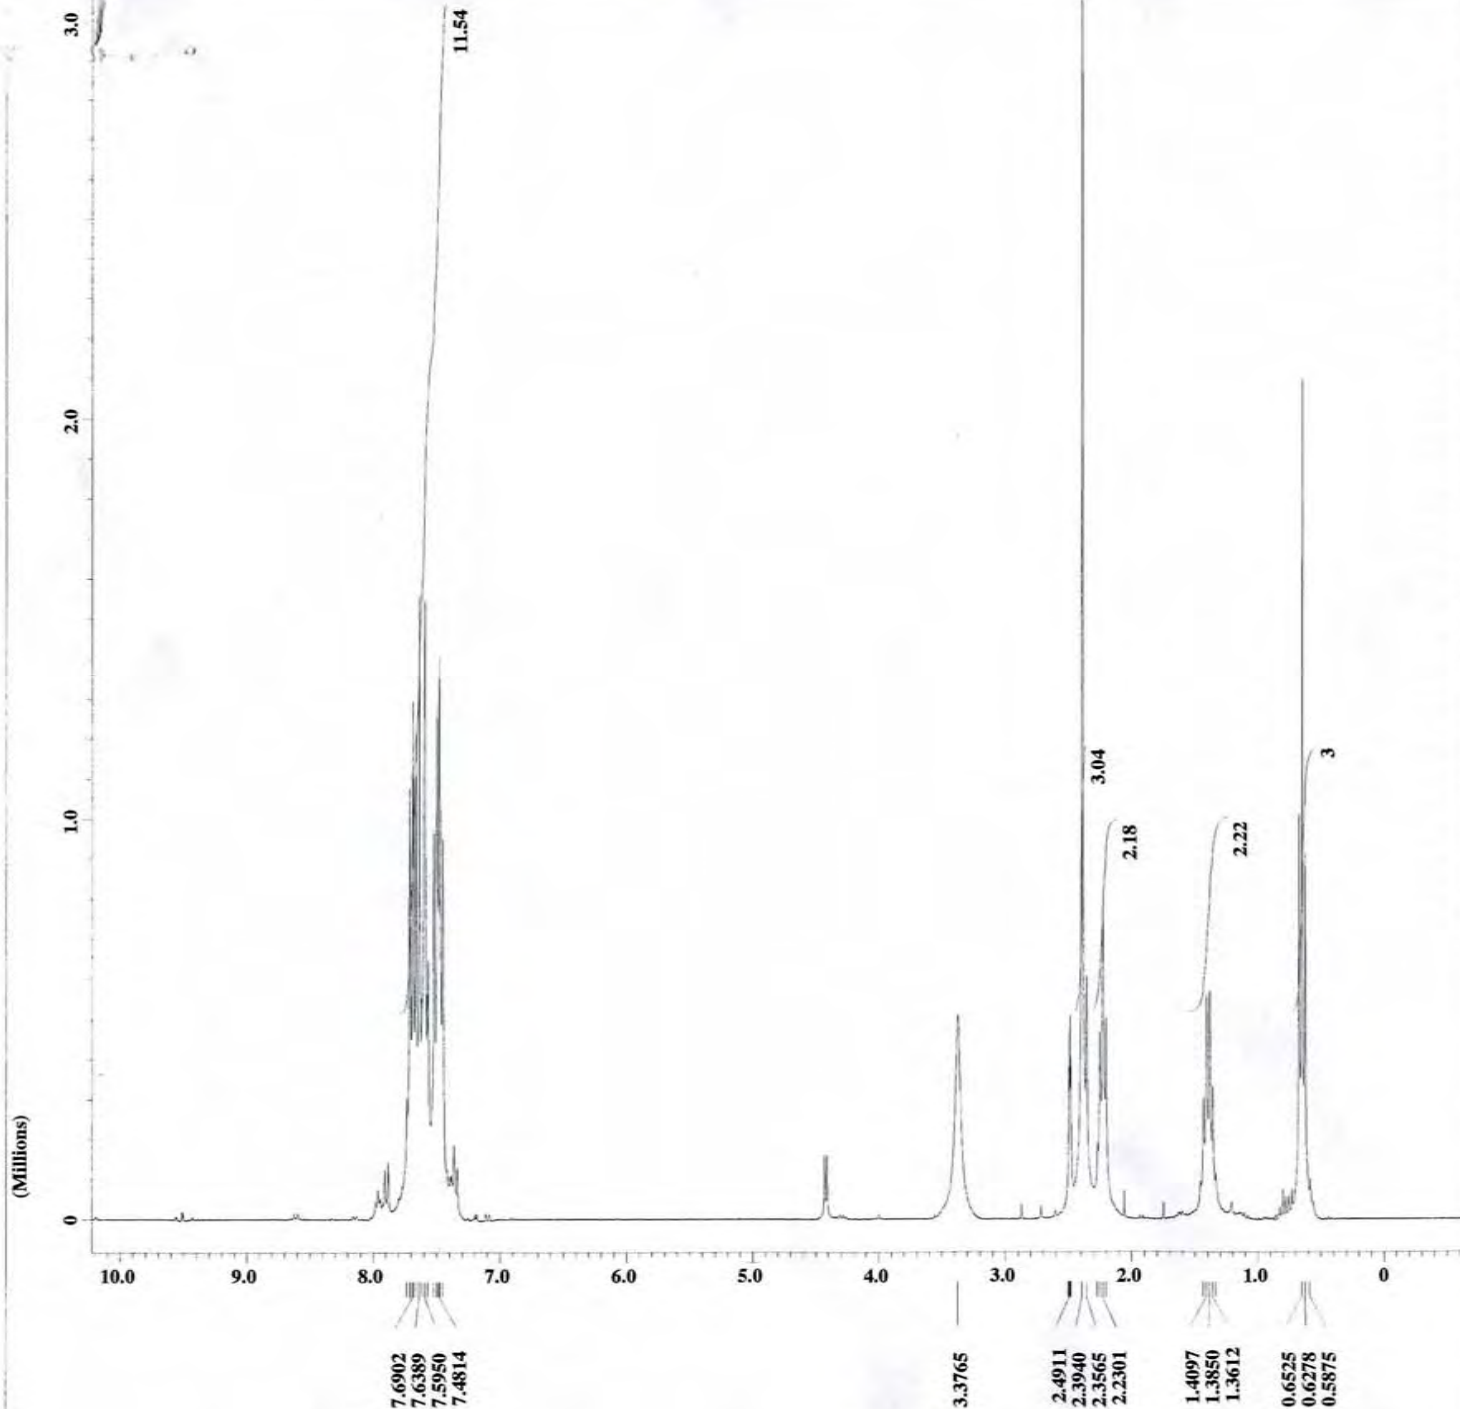

Filename = ld\_spectrum-201.jdf  
 Author = alex  
 Experiment = single\_pulse.exp  
 Sample\_id = S#671616  
 Solvent = DMSO-D6  
 Creation\_time = 17-DEC-2010 18:32:53  
 Revision\_time = 18-DEC-2010 17:16:36  
 Current\_time = 18-DEC-2010 17:16:53

Comment = Single Pulse Experime  
 Data\_format = 1D\_REAL  
 Dim\_size = 16384  
 Dim\_title = 1H  
 Dim\_units = [ppm]  
 Dimensions = X  
 Site = Eclipse+ 300  
 Spectrometer = DELTA\_NMR

Field\_strength = 7.0586013[T] (300[MHz]  
 X\_acq\_duration = 3.6339712[s]  
 X\_domain = 1H  
 X\_freq = 300.52965592[MHz]  
 X\_offset = 5[ppm]  
 X\_points = 16384  
 X\_prescans = 0  
 X\_resolution = 0.27518105[Hz]  
 X\_sweep = 4.50856628[kHz]  
 Clipped = FALSE  
 Mod\_return = 1  
 Scans = 8  
 Total\_scans = 8

X\_90\_width = 16[us]  
 X\_acq\_time = 3.6339712[s]  
 X\_angle = 45[deg]  
 X\_pulse = 8[us]  
 Initial\_wait = 1[s]  
 Phase\_preset = 3[us]  
 Recvr\_gain = 15  
 Relaxation\_delay = 4[s]  
 Temp\_get = 23[dC]  
 Unblank\_time = 2[us]

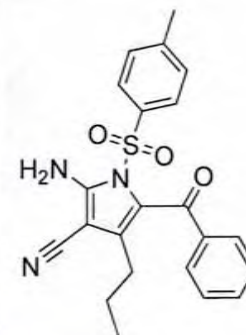

A<sub>11</sub>  
 300 MHz, DMSO-d<sub>6</sub>

X : parts per Million : 1H



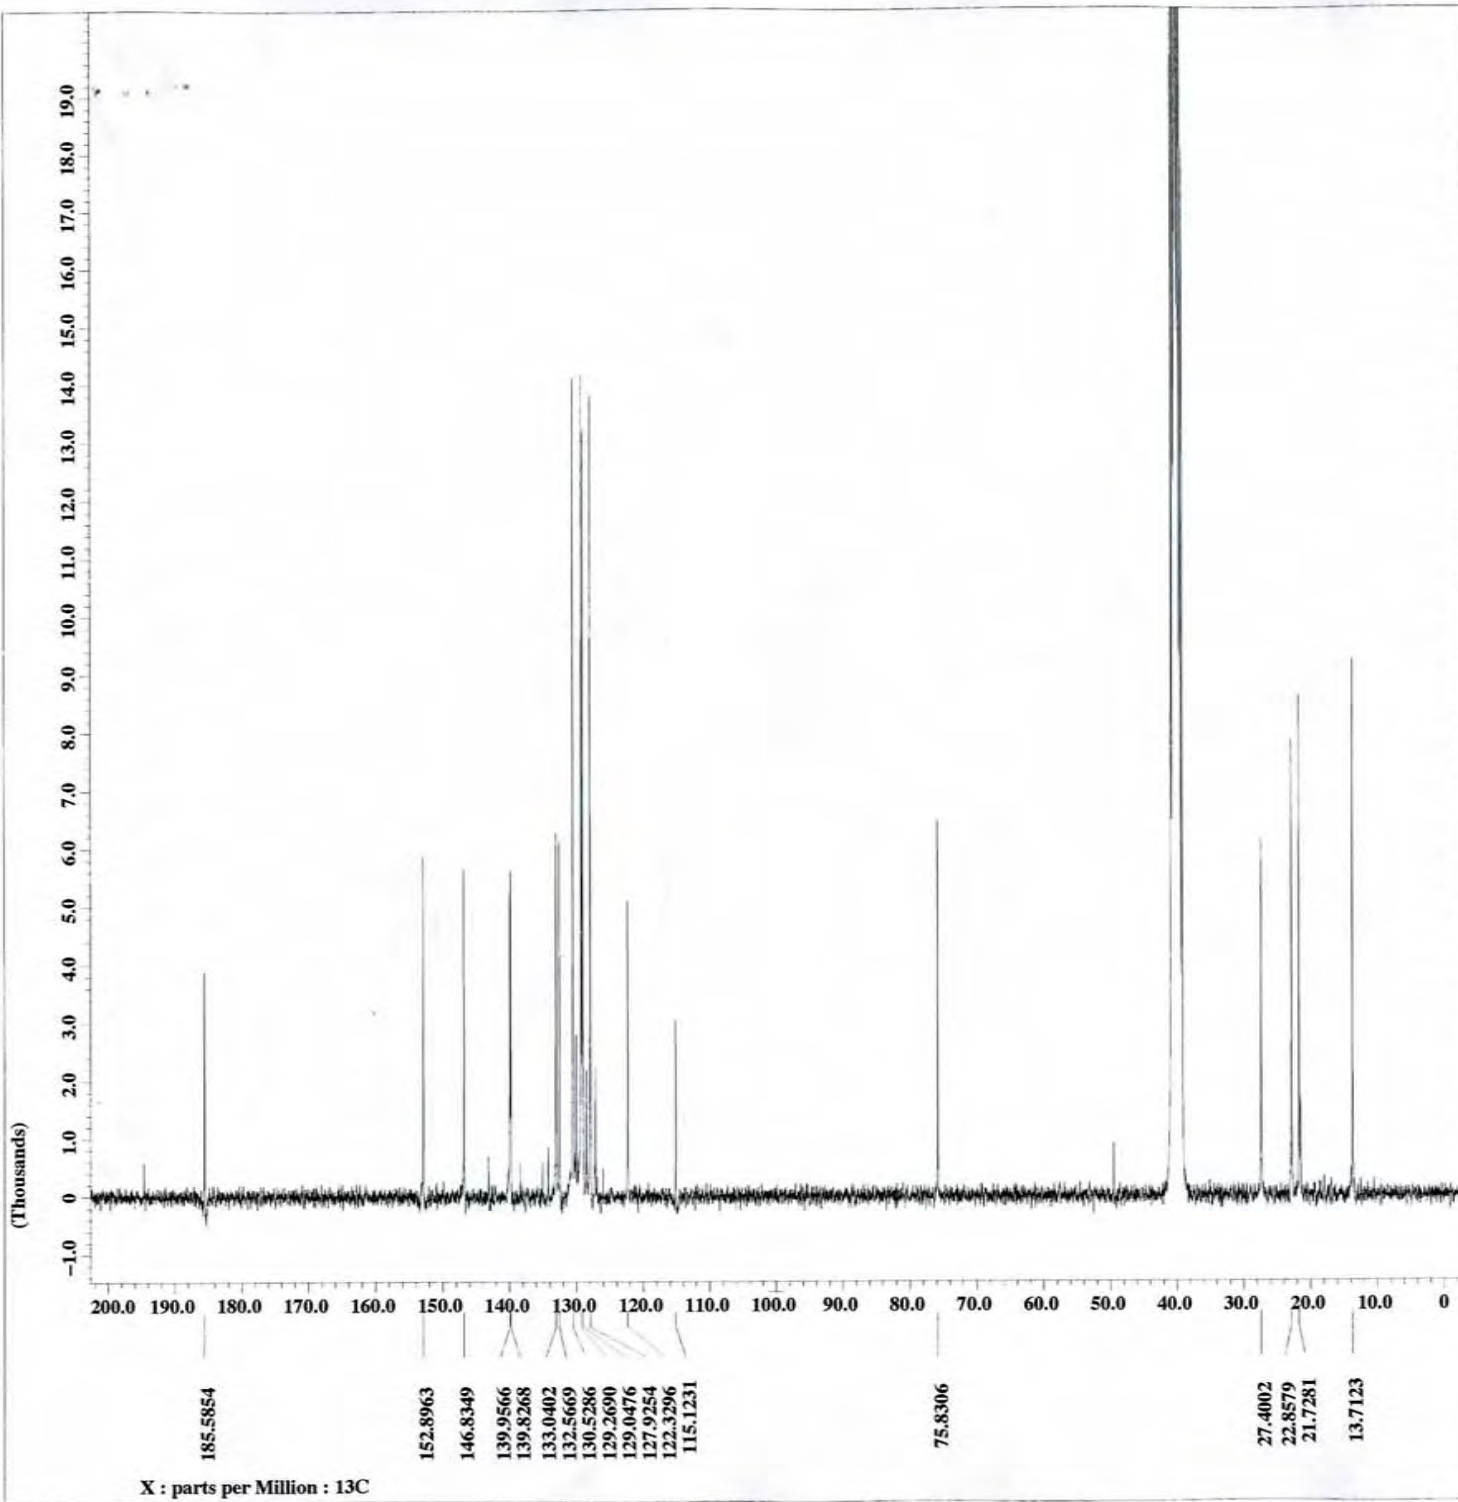

```

Filename      = ld_13c_spectrum-109.j
Author       = alex
Experiment    = single_pulse_dec
Sample_id    = S#675148
Solvent      = DMSO-D6
Creation_time = 18-DEC-2010 06:46:52
Revision_time = 18-DEC-2010 17:10:36
Current_time  = 18-DEC-2010 17:11:38

Comment      = Single Pulse with Bro
Data_format  = 1D_REAL
Dim_size     = 32768
Dim_title    = 13C
Dim_units    = [ppm]
Dimensions   = X
Site         = Eclipse+ 300
Spectrometer = DELTA_NMR

Field_strength = 7.0586013[T] (300[MHz]
X_acq_duration = 1.7334272[s]
X_domain       = 13C
X_freq        = 75.56823426[MHz]
X_offset      = 100[ppm]
X_points      = 32768
X_prescans    = 4
X_resolution  = 0.57689184[Hz]
X_sweep       = 18.90359168[kHz]
Irr_domain    = 1H
Irr_freq      = 300.52965592[MHz]
Irr_offset    = 5[ppm]
Clipped       = FALSE
Mod_return    = 1
Scans         = 16000
Total_scans   = 16000

X_90_width   = 8.1[us]
X_acq_time   = 1.7334272[s]
X_angle      = 30[deg]
X_pulse      = 2.7[us]
Initial_wait = 1[s]
Phase_preset = 3[us]
Recvr_gain   = 15
Relaxation_delay = 1[s]

```

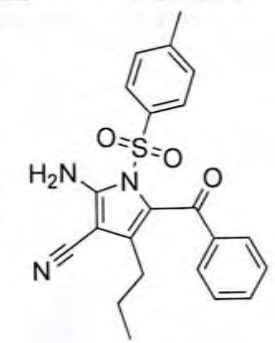

A<sub>11</sub>  
75 MHz, DMSO-d<sub>6</sub>



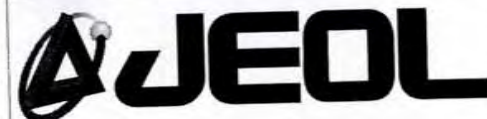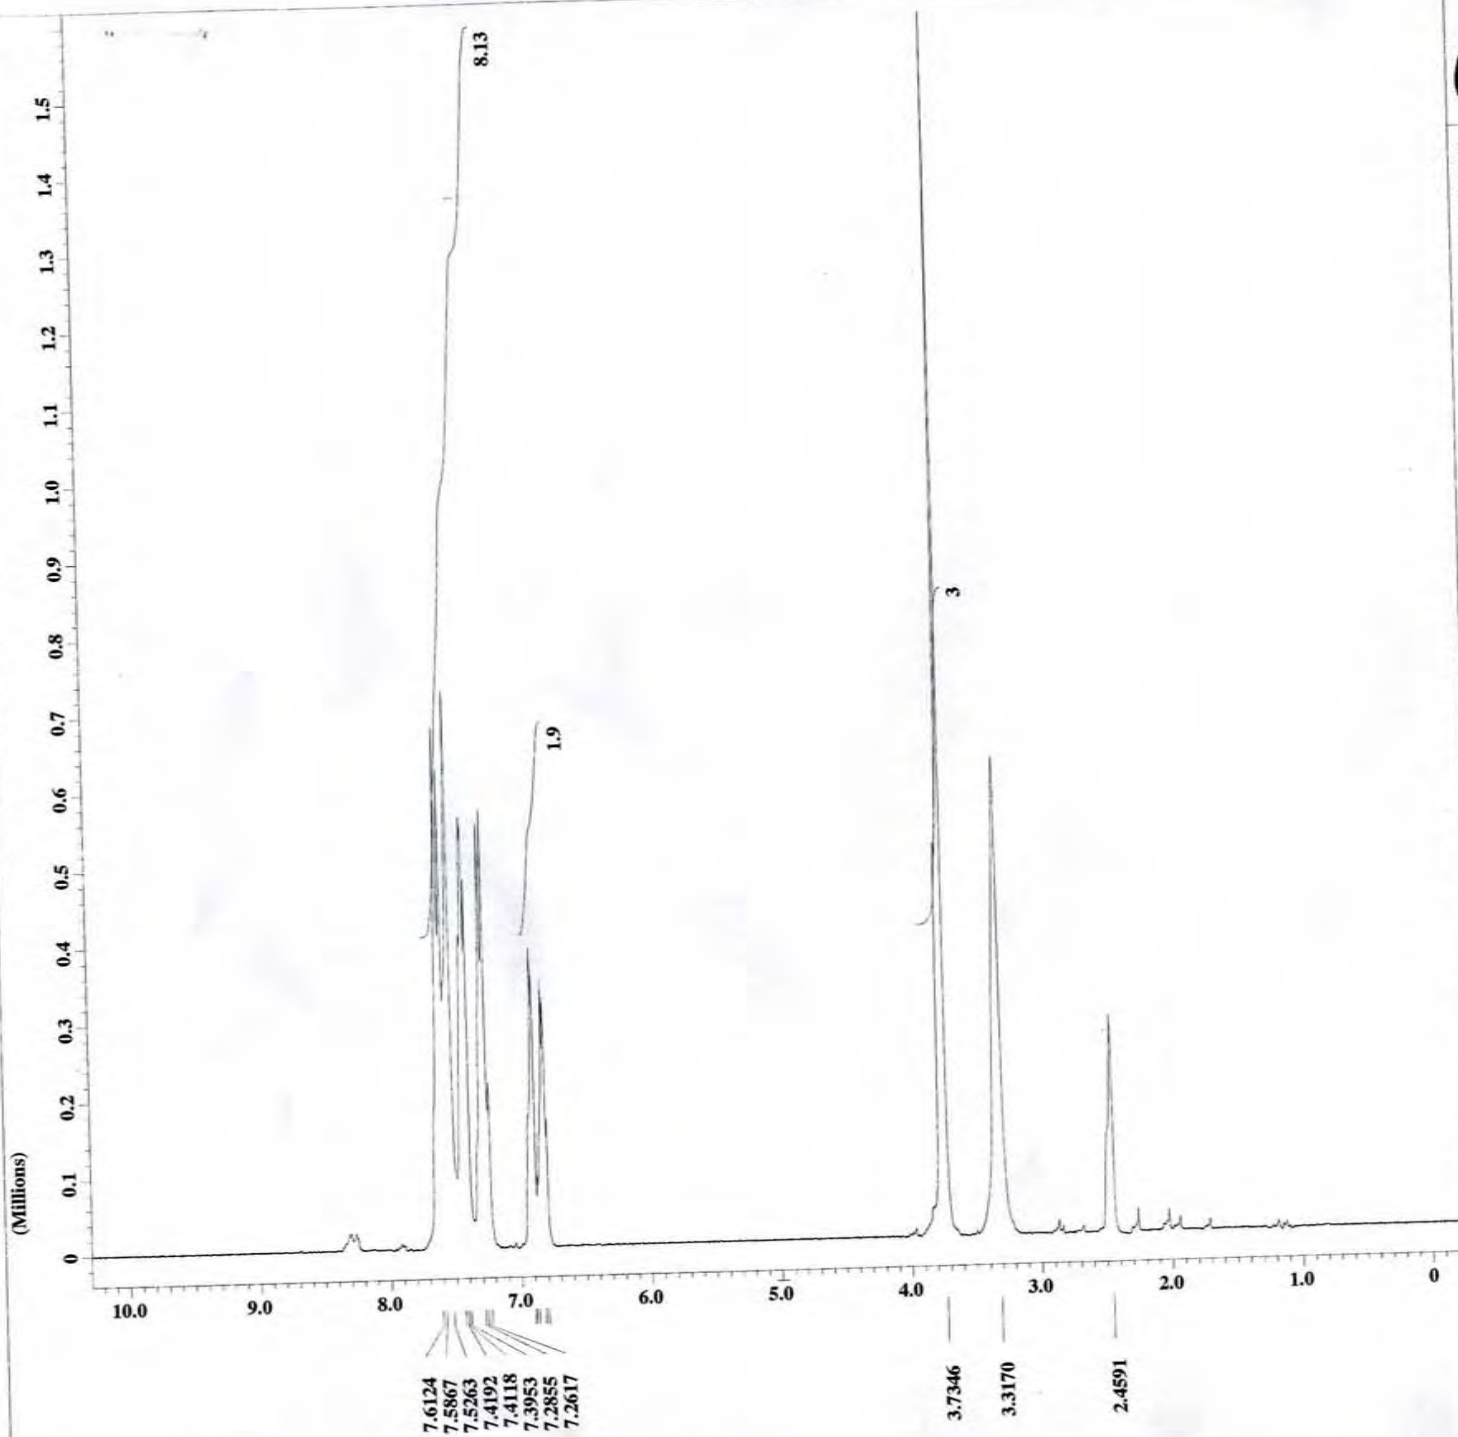

Filename = 1d\_spectrum-145.jdf  
Author = alex  
Experiment = single\_pulse.exp  
Sample\_id = S#34560  
Solvent = DMSO-D6  
Creation\_time = 10-DEC-2010 09:29:32  
Revision\_time = 10-DEC-2010 19:46:17  
Current\_time = 10-DEC-2010 19:46:25

Comment = Single Pulse Experime  
Data\_format = 1D REAL  
Dim\_size = 16384  
Dim\_title = 1H  
Dim\_units = [ppm]  
Dimensions = X  
Site = Eclipse+ 300  
Spectrometer = DELTA\_NMR

Field\_strength = 7.0586013[T] (300[MHz]  
X\_acq\_duration = 3.6339712[s]  
X\_domain = 1H  
X\_freq = 300.52965592[MHz]  
X\_offset = 5[ppm]  
X\_points = 16384  
X\_prescans = 0  
X\_resolution = 0.27518105[Hz]  
X\_sweep = 4.50856628[kHz]  
Clipped = FALSE  
Mod\_return = 1  
Scans = 8  
Total\_scans = 8

X\_90\_width = 16[us]  
X\_acq\_time = 3.6339712[s]  
X\_angle = 45[deg]  
X\_pulse = 8[us]  
Initial\_wait = 1[s]  
Phase\_preset = 3[us]  
Recvr\_gain = 15  
Relaxation\_delay = 4[s]  
Temp\_get = 21.2[dC]  
Unblank\_time = 2[us]

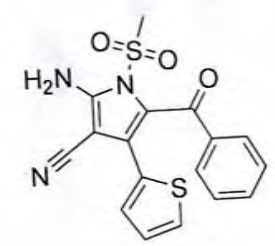

A<sub>12</sub>  
300 MHz, DMSO-d<sub>6</sub>

X : parts per Million : 1H

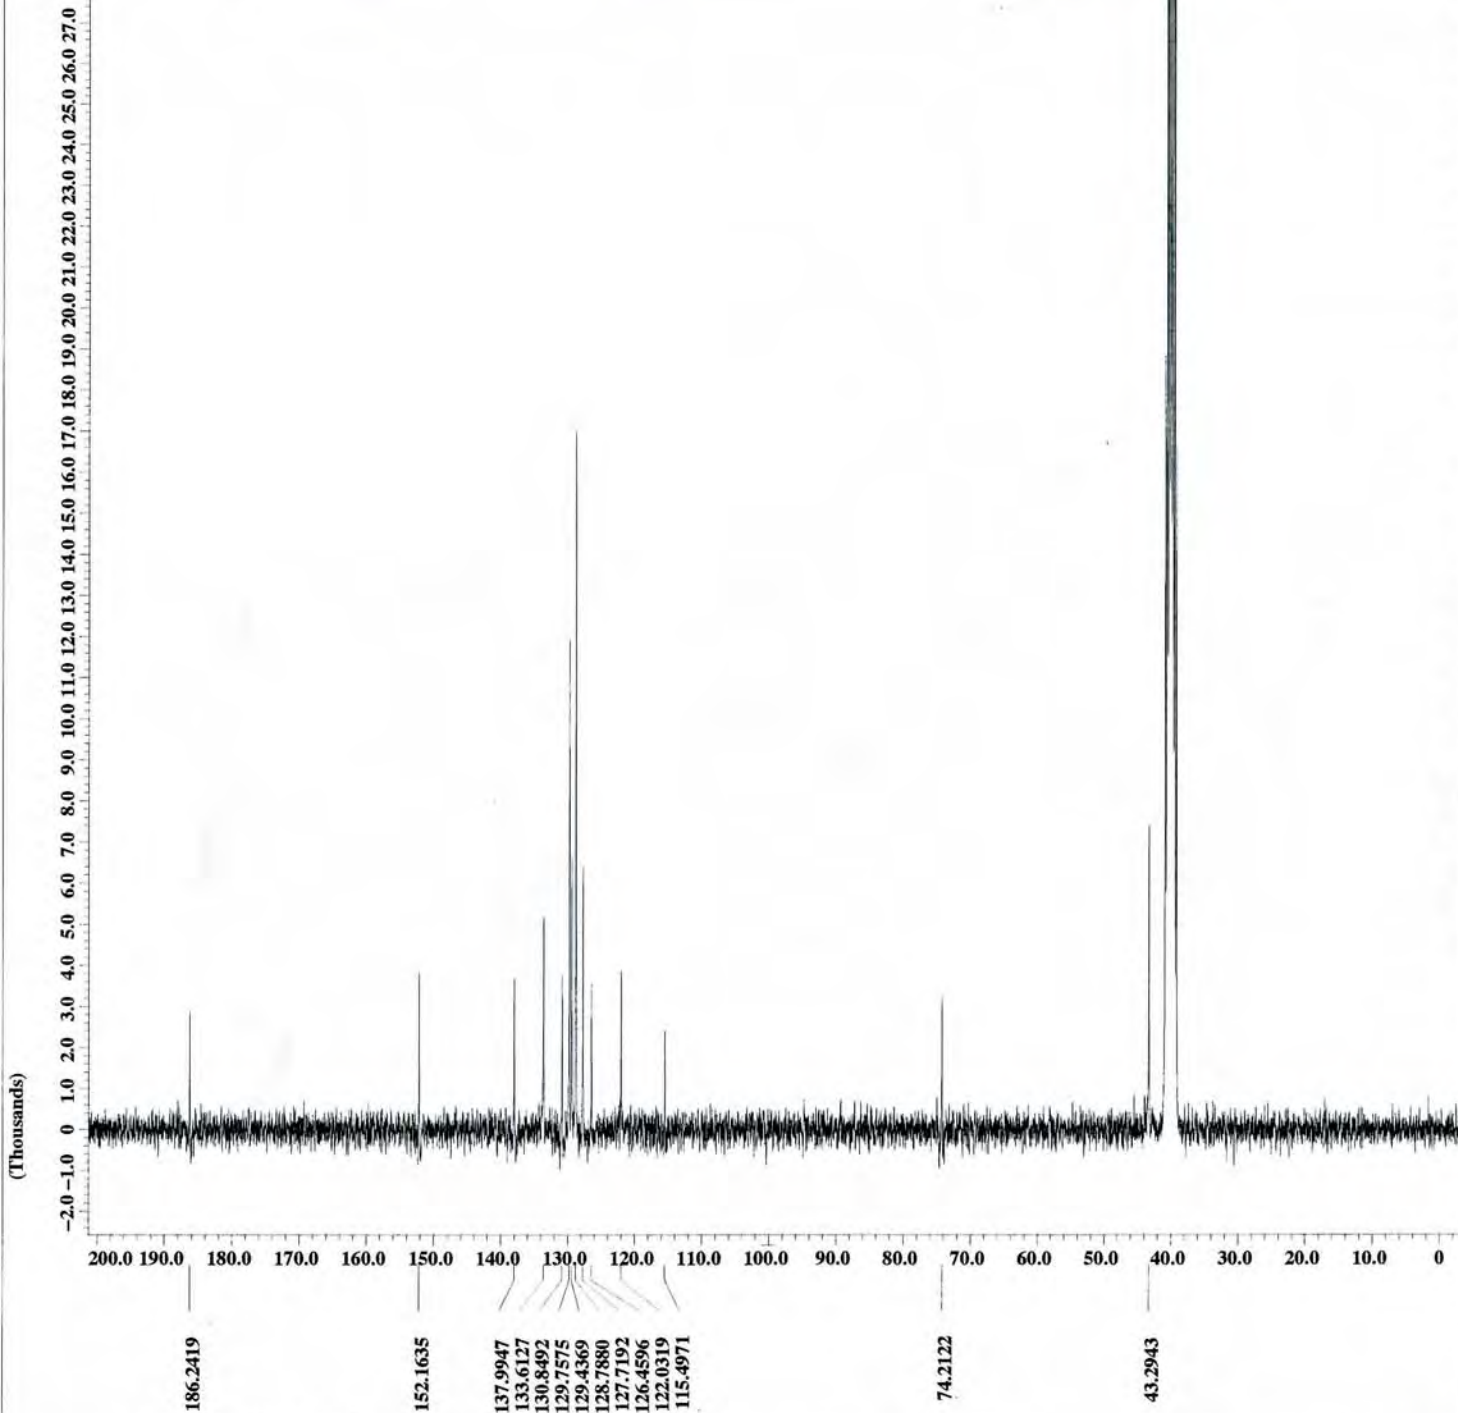

```

Filename      = 1d_13c_spectrum-81.jd
Author       = alex
Experiment   = single_pulse_dec
Sample_id    = S#347199
Solvent      = DMSO-D6
Creation time = 10-DEC-2010 11:02:29
Revision time = 10-DEC-2010 19:29:32
Current_time = 10-DEC-2010 19:29:43
    
```

```

Comment      = Single Pulse with Bro
Data_format  = 1D_REAL
Dim_size     = 32768
Dim_title    = 13C
Dim_units    = [ppm]
Dimensions   = X
Site         = Eclipse+ 300
Spectrometer = DELTA_NMR
    
```

```

Field_strength = 7.0586013[T] (300[MHz]
X_acq_duration = 1.7334272[s]
X_domain      = 13C
X_freq        = 75.56823426[MHz]
X_offset      = 100[ppm]
X_points      = 32768
X_prescans    = 4
X_resolution  = 0.57689184[Hz]
X_sweep       = 18.90359168[kHz]
Irr_domain    = 1H
Irr_freq      = 300.52965592[MHz]
Irr_offset    = 5[ppm]
Clipped       = FALSE
Mod_return    = 1
Scans         = 2000
Total_scans   = 2000
    
```

```

X_90_width    = 8.1[us]
X_acq_time     = 1.7334272[s]
X_angle        = 30[deg]
X_pulse        = 2.7[us]
Initial_wait   = 1[s]
Phase_preset   = 3[us]
Recvr_gain     = 15
Relaxation_delay = 1[s]
Temp_get       = 23.1[dC]
Unblank_time   = 2[us]
    
```

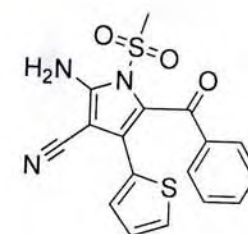

A<sub>12</sub>  
75 MHz, DMSO-d<sub>6</sub>

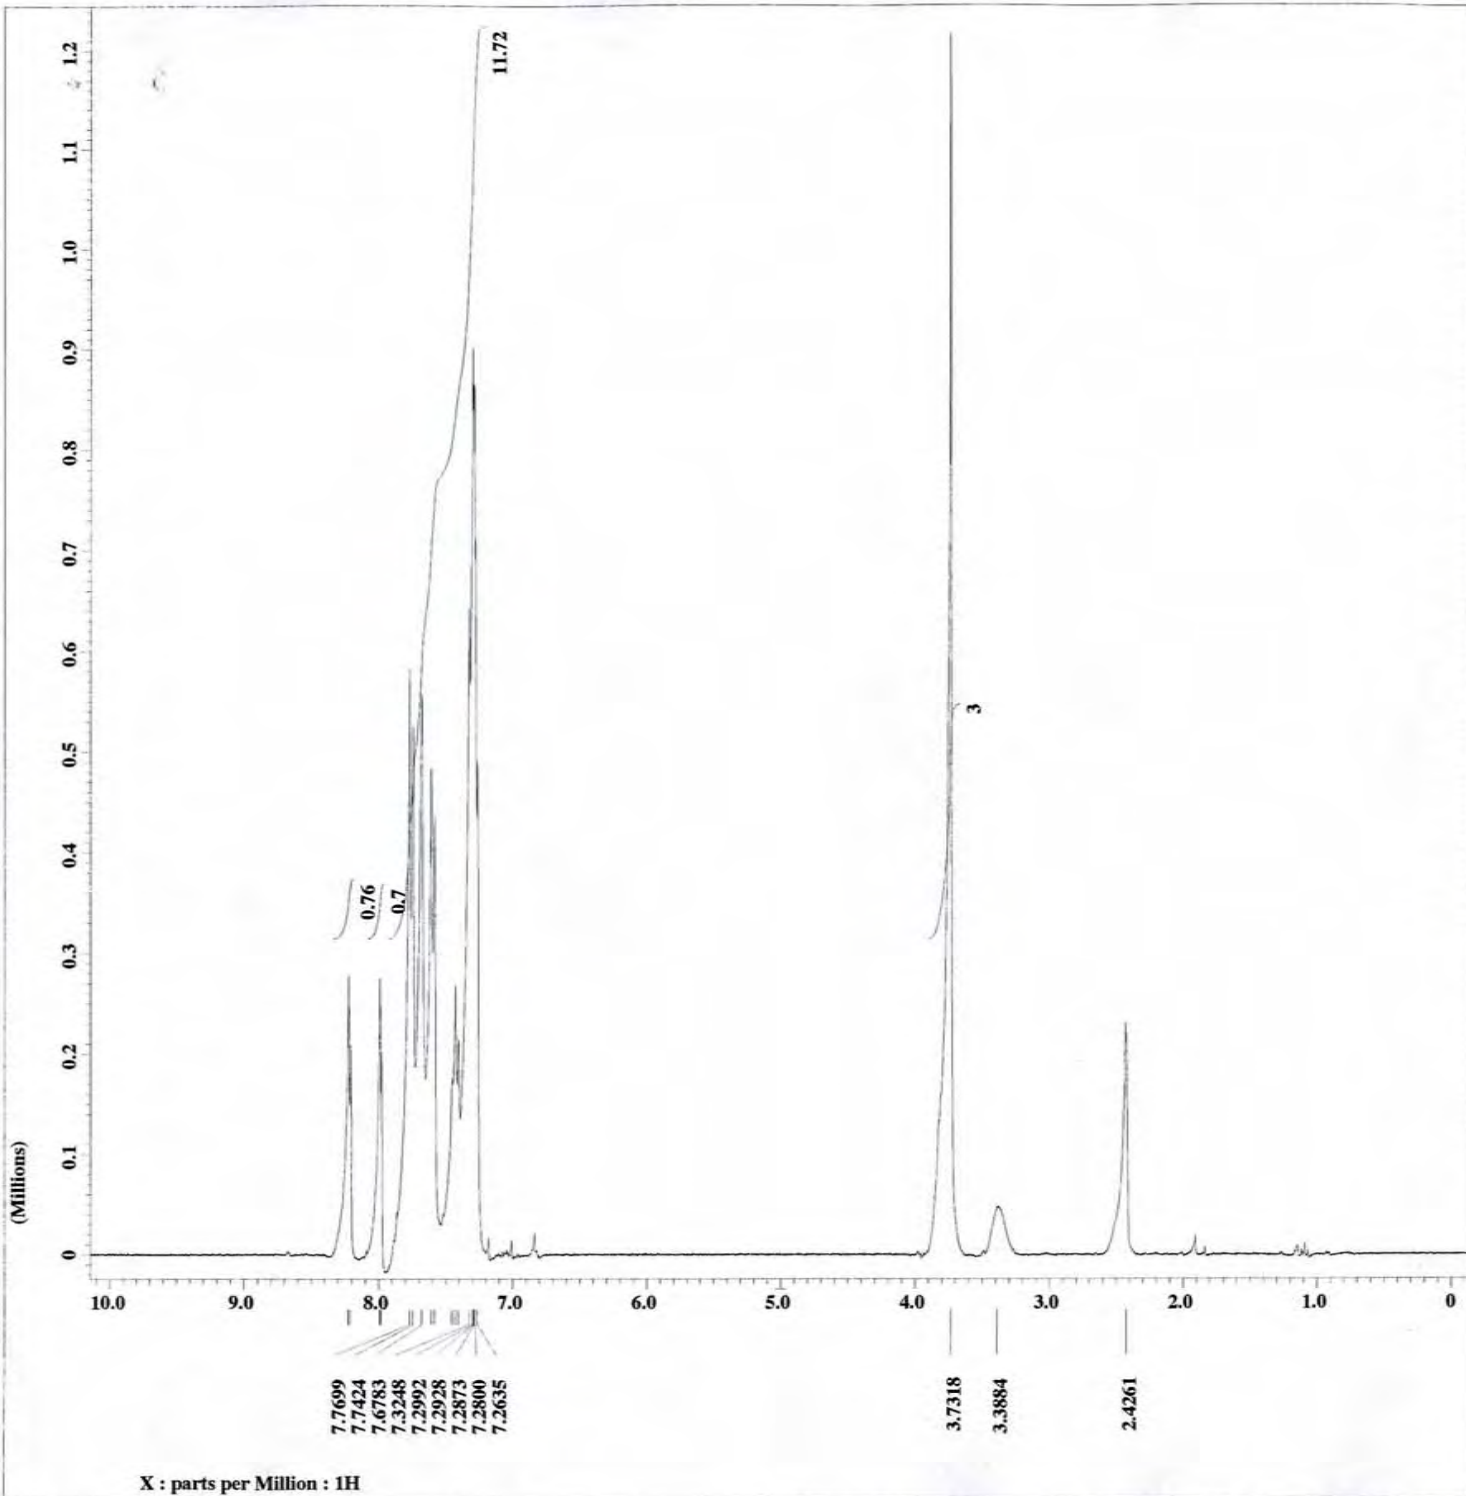

# JEOL

Filename = 1d\_spectrum-87.jdf  
 Author = alex  
 Experiment = single\_pulse.exp  
 Sample\_id = S#389823  
 Solvent = DMSO-D6  
 Creation\_time = 7-DEC-2010 10:43:46  
 Revision\_time = 7-DEC-2010 12:12:35  
 Current\_time = 7-DEC-2010 12:12:45

Comment = Single Pulse Experime  
 Data\_format = 1D REAL  
 Dim\_size = 16384  
 Dim\_title = 1H  
 Dim\_units = [ppm]  
 Dimensions = X  
 Site = Eclipse+ 300  
 Spectrometer = DELTA\_NMR

Field\_strength = 7.0586013[T] (300[MHz])  
 X\_acq\_duration = 3.6339712[s]  
 X\_domain = 1H  
 X\_freq = 300.52965592[MHz]  
 X\_offset = 5[ppm]  
 X\_points = 16384  
 X\_prescans = 0  
 X\_resolution = 0.27518105[Hz]  
 X\_sweep = 4.50856628[kHz]  
 Clipped = FALSE  
 Mod\_return = 1  
 Scans = 8  
 Total\_scans = 8

X\_90\_width = 16[us]  
 X\_acq\_time = 3.6339712[s]  
 X\_angle = 45[deg]  
 X\_pulse = 8[us]  
 Initial\_wait = 1[s]  
 Phase\_preset = 3[us]  
 Recvr\_gain = 15  
 Relaxation\_delay = 4[s]  
 Temp\_get = 23.3[dC]  
 Unbl

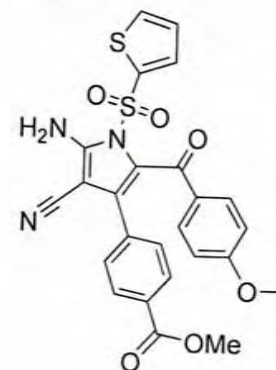

<sup>13</sup>A  
 300 MHz, DMSO-d<sub>6</sub>



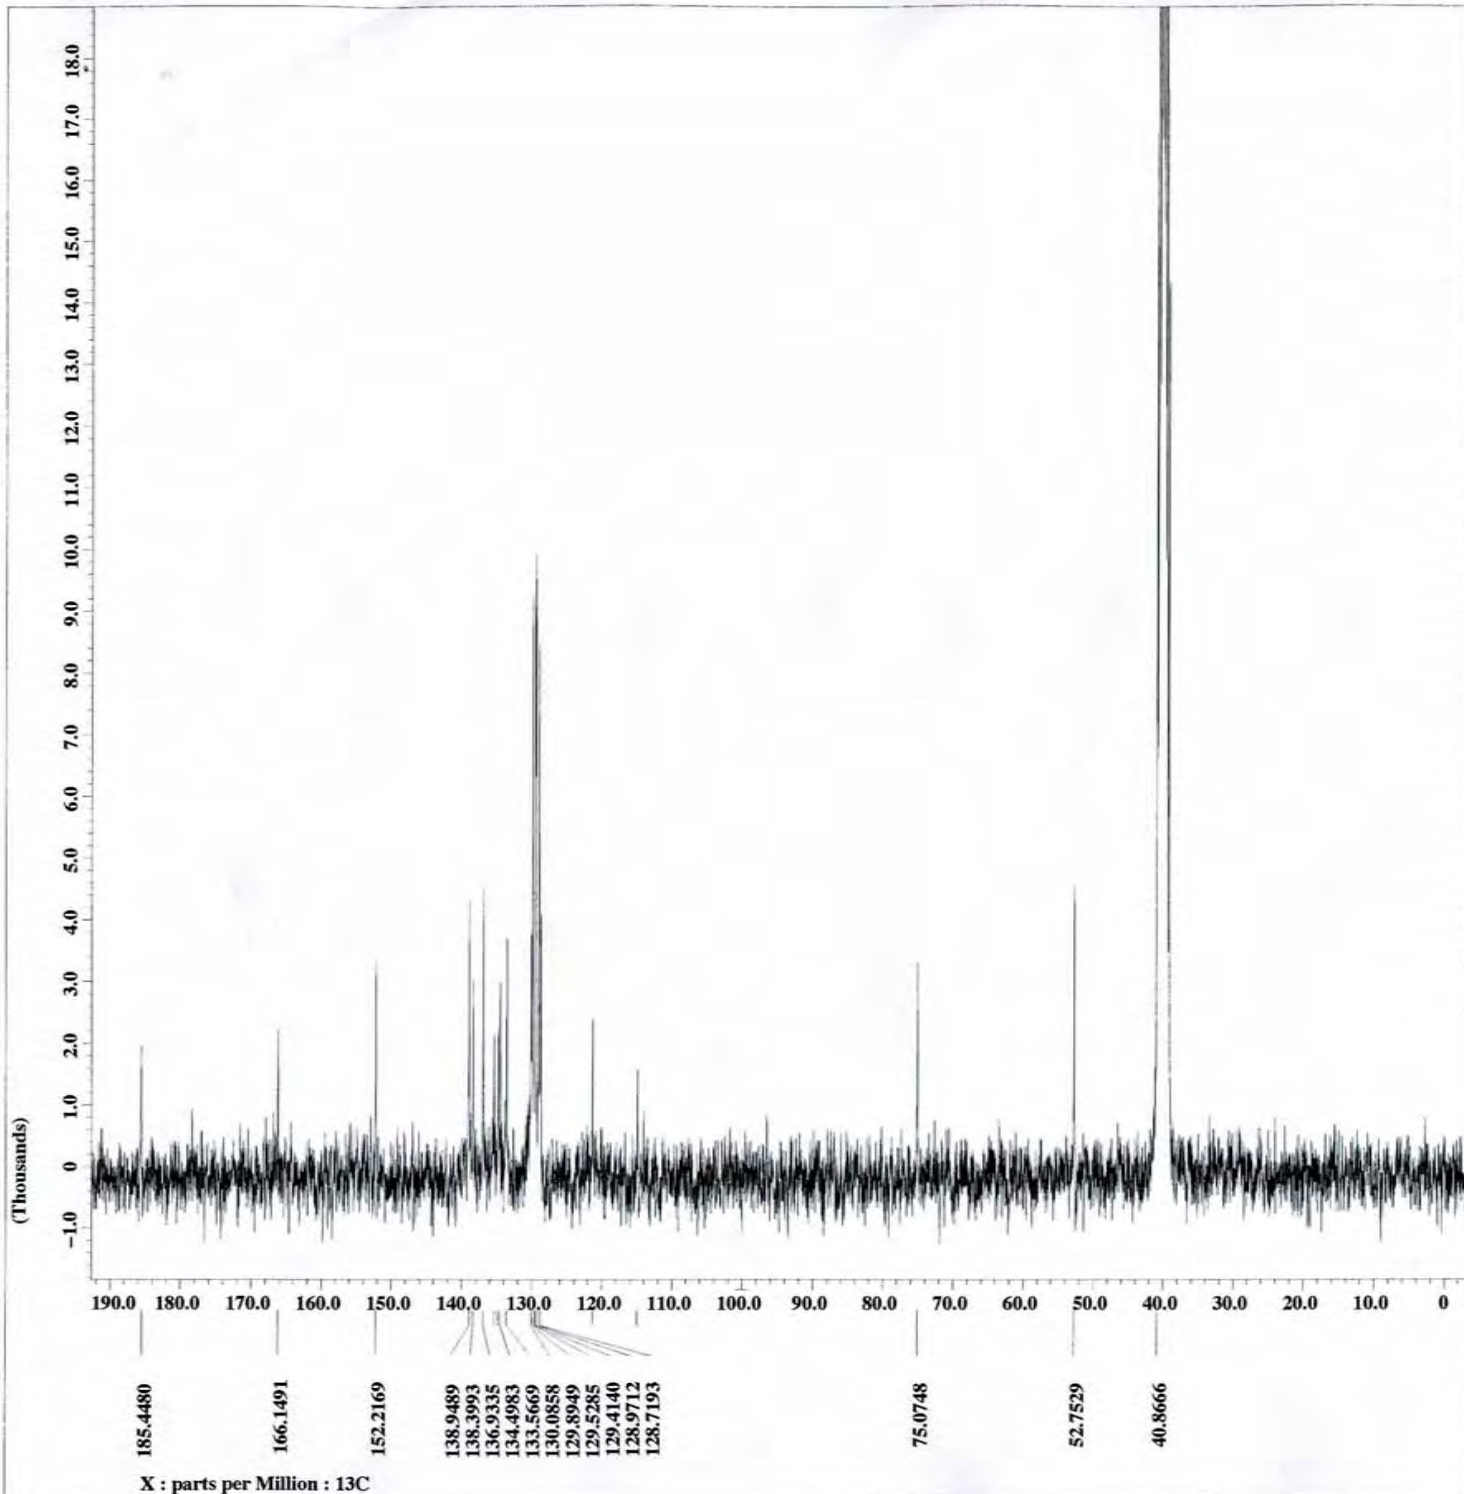

```

Filename      = ld_13c_spectrum-53.jd
Author       = alex
Experiment    = single_pulse_dec
Sample_id     = S#391453
Solvent      = DMSO-D6
Creation time = 7-DEC-2010 11:39:48
Revision time = 7-DEC-2010 12:07:28
Current_time  = 7-DEC-2010 12:07:55
  
```

```

Comment      = Single Pulse with Bro
Data_format  = 1D COMPLEX
Dim_size     = 32768
Dim_title    = 13C
Dim_units    = [ppm]
Dimensions   = X
Site         = Eclipse+ 300
Spectrometer = DELTA_NMR
  
```

```

Field_strength = 7.0586013[T] (300[MHz]
X_acq_duration = 1.7334272[s]
X_domain      = 13C
X_freq        = 75.56823426[MHz]
X_offset      = 100[ppm]
X_points      = 32768
X_prescans    = 4
X_resolution  = 0.57689184[Hz]
X_sweep       = 18.90359168[kHz]
Irr_domain    = 1H
Irr_freq      = 300.52965592[MHz]
Irr_offset    = 5[ppm]
Clipped       = FALSE
Mod_return    = 1
Scans         = 1200
Total_scans   = 1200
  
```

```

X_90_width    = 8.1[us]
X_acq_time     = 1.7334272[s]
X_angle        = 30[deg]
X_pulse        = 2.7[us]
Initial_wait   = 1[s]
Phase_preset   = 3[us]
Recvr_gain     = 15
  
```

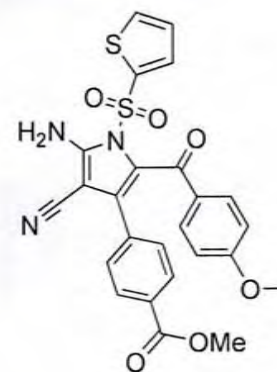

A<sub>13</sub>  
75 MHz, DMSO-d<sub>6</sub>

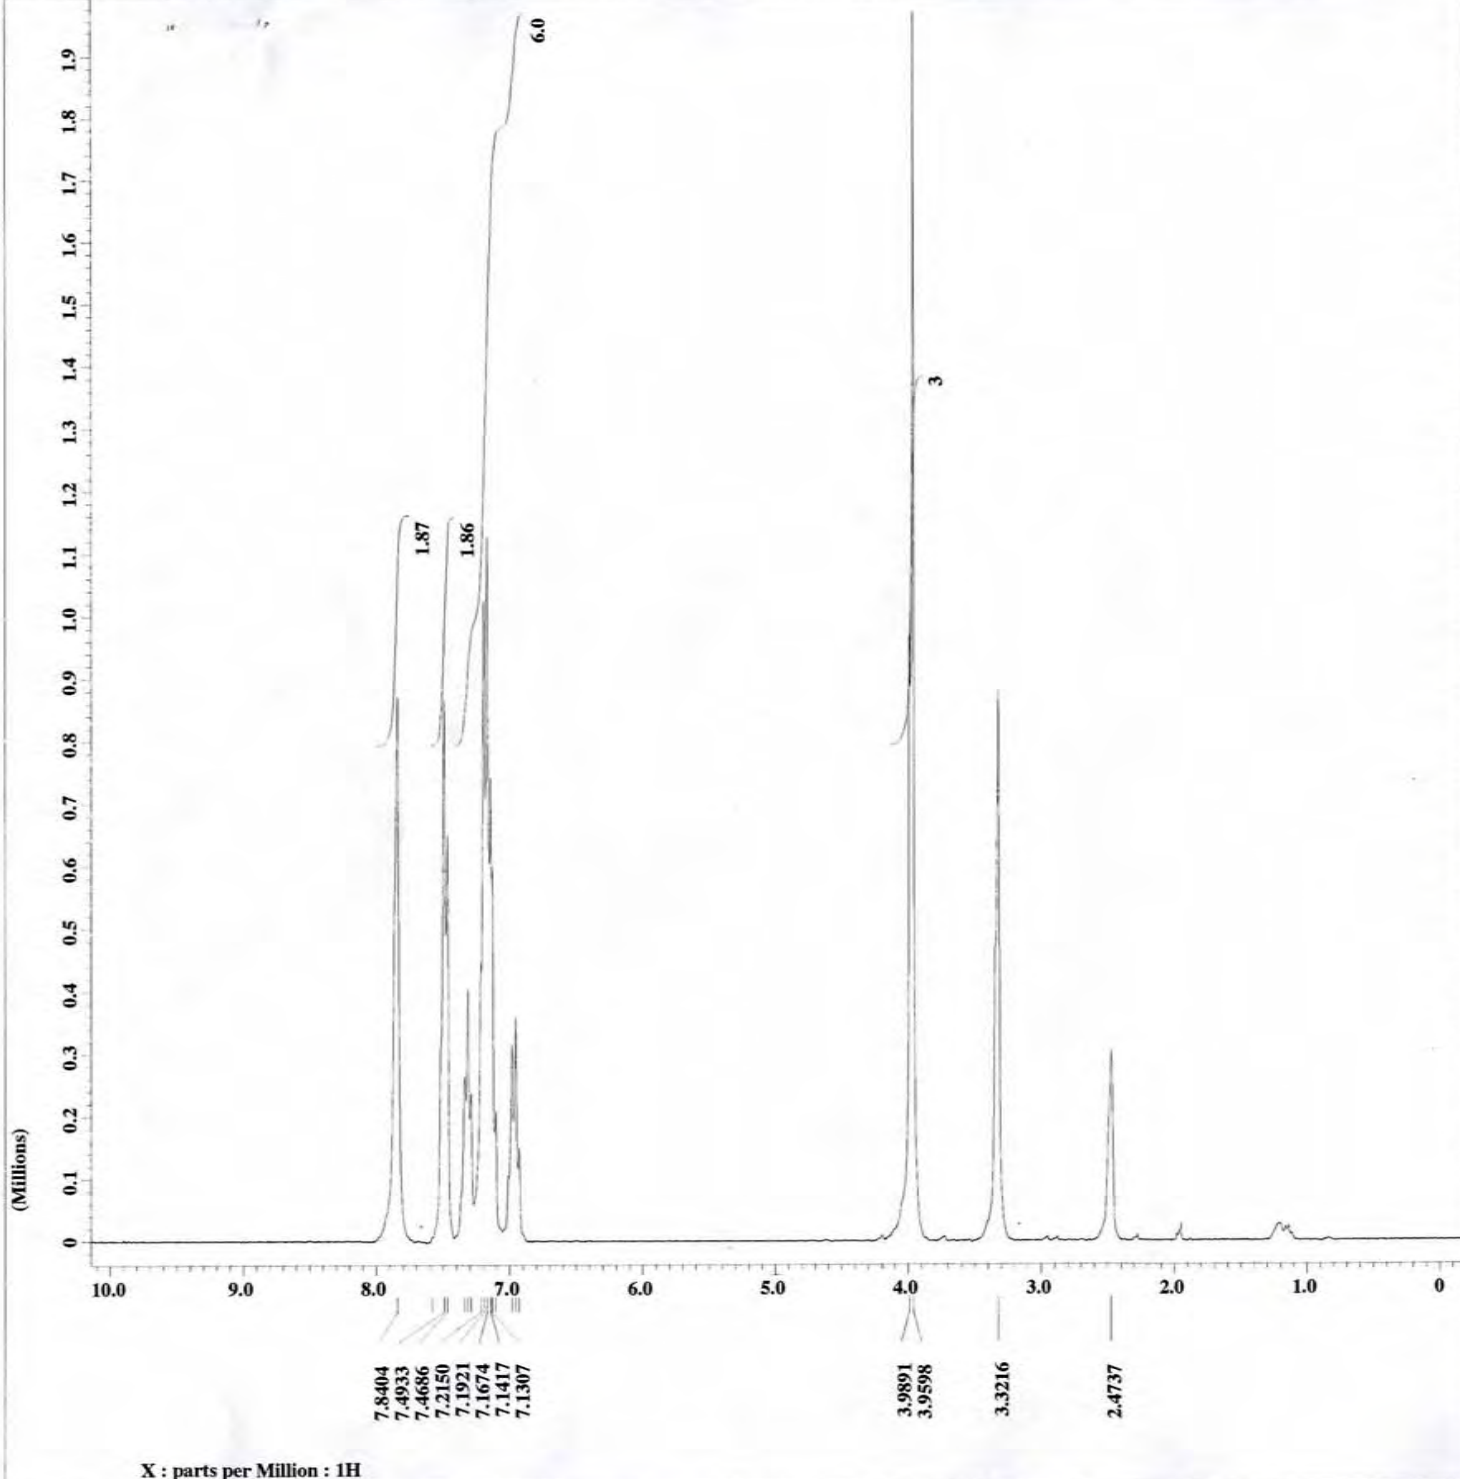

```

Filename      = 1d_spectrum-89.jdf
Author       = alex
Experiment   = single_pulse.exp
Sample_id    = S348461
Solvent      = DMSO-D6
Creation_time = 8-DEC-2010 09:34:15
Revision_time = 8-DEC-2010 10:49:55
Current_time = 8-DEC-2010 10:50:00

Comment      = Single Pulse Experime
Data_format  = 1D_REAL
Dim_size     = 16384
Dim_title    = 1H
Dim_units    = [ppm]
Dimensions   = X
Site        = Eclipse+ 300
Spectrometer = DELTA_NMR

Field_strength = 7.0586013[T] (300[MHz]
X_acq_duration = 3.6339712[s]
X_domain       = 1H
X_freq         = 300.52965592[MHz]
X_offset       = 5[ppm]
X_points       = 16384
X_prescans     = 0
X_resolution   = 0.27518105[Hz]
X_sweep        = 4.50856628[kHz]
Clipped        = FALSE
Mod_return     = 1
Scans          = 8
Total_scans    = 8

X_90_width    = 16[us]
X_acq_time     = 3.6339712[s]
X_angle        = 45[deg]
X_pulse        = 8[us]
Initial_wait   = 1[s]
Phase_preset   = 3[us]
Recvr_gain     = 15
Relaxation_delay = 4[s]
Temp_get       = 21.4[dC]
Unblank_time   = 2[us]
  
```

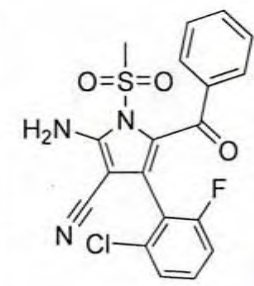

A<sub>14</sub>  
300 MHz, DMSO-d<sub>6</sub>



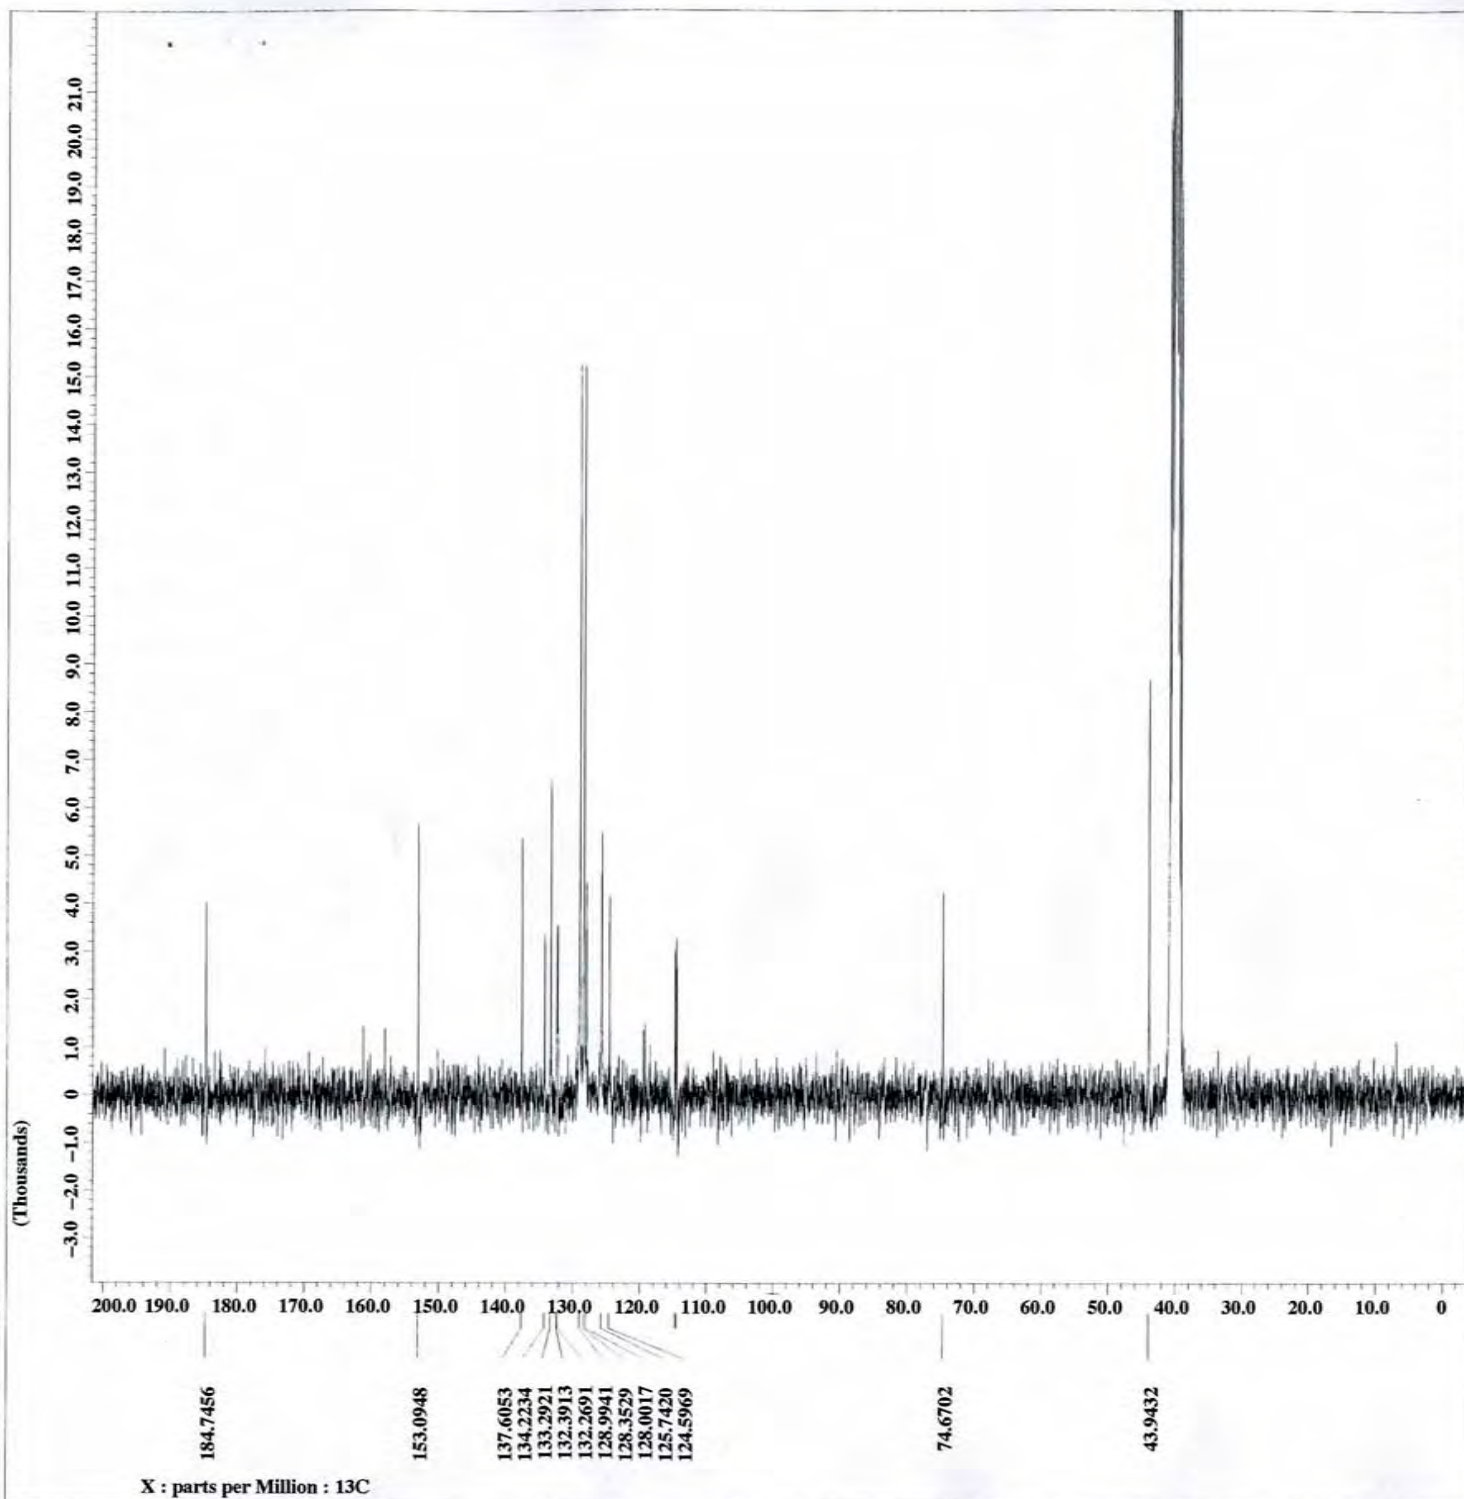

# JEOL

Filename = ld\_13c\_spectrum-58.jd  
 Author = alex  
 Experiment = single\_pulse\_dec  
 Sample\_id = S#349586  
 Solvent = DMSO-D6  
 Creation time = 8-DEC-2010 10:29:58  
 Revision time = 8-DEC-2010 10:41:06  
 Current\_time = 8-DEC-2010 10:53:38

Comment = Single Pulse with Bro  
 Data\_format = 1D\_REAL  
 Dim\_size = 32768  
 Dim\_title = 13C  
 Dim\_units = [ppm]  
 Dimensions = X  
 Site = Eclipse+ 300  
 Spectrometer = DELTA\_NMR

Field\_strength = 7.0586013[T] (300[MHz])  
 X\_acq\_duration = 1.7334272[s]  
 X\_domain = 13C  
 X\_freq = 75.56823426[MHz]  
 X\_offset = 100[ppm]  
 X\_points = 32768  
 X\_prescans = 4  
 X\_resolution = 0.57689184[Hz]  
 X\_sweep = 18.90359168[kHz]  
 Irr\_domain = 1H  
 Irr\_freq = 300.52965592[MHz]  
 Irr\_offset = 5[ppm]  
 Clipped = FALSE  
 Mod\_return = 1  
 Scans = 1200  
 Total\_scans = 1200

X\_90\_width = 8.1[us]  
 X\_acq\_time = 1.7334272[s]  
 X\_angle = 30[deg]  
 X\_pulse = 2.7[us]  
 Initial\_wait = 1[s]  
 Phase\_preset = 3[us]  
 Recvr\_gain = 15  
 Relaxation\_delay = 1[s]  
 Temp\_get = 22.9[dC]  
 Unblank\_time = 2[us]

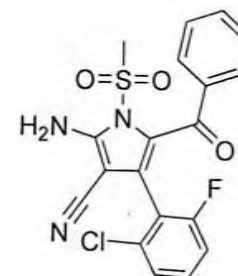

A<sub>14</sub>  
 75 MHz, DMSO-d<sub>6</sub>

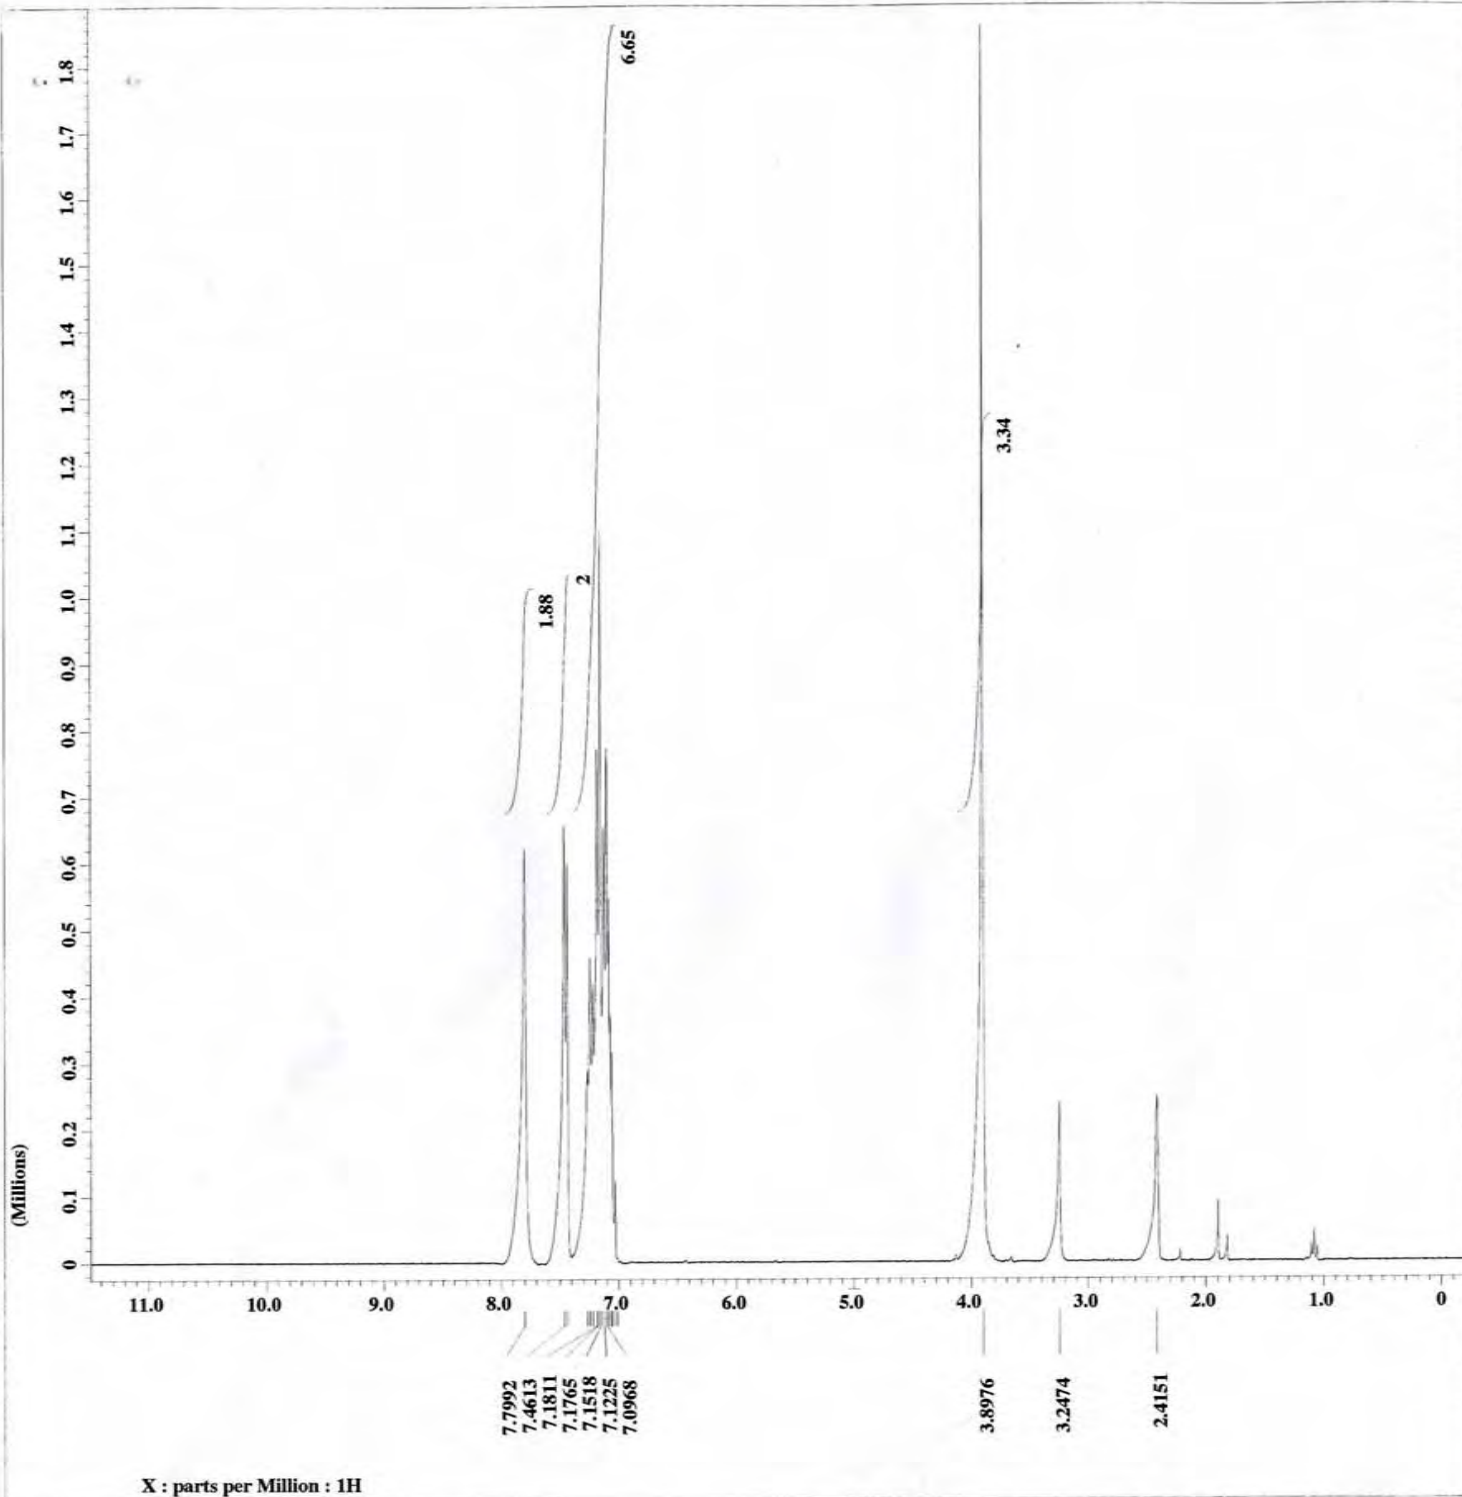

# JEOL

Filename = 1d\_spectrum-86.jdf  
 Author = alex  
 Experiment = single\_pulse.exp  
 Sample\_id = S#598507  
 Solvent = DMSO-D6  
 Creation\_time = 7-DEC-2010 16:31:04  
 Revision\_time = 7-DEC-2010 16:49:16  
 Current\_time = 7-DEC-2010 16:49:30

Comment = Single Pulse Experime  
 Data format = 1D REAL  
 Dim\_size = 16384  
 Dim\_title = 1H  
 Dim\_units = [ppm]  
 Dimensions = X  
 Site = Eclipse+ 300  
 Spectrometer = DELTA\_NMR

Field\_strength = 7.0586013[T] (300[MHz]  
 X\_acq\_duration = 3.6339712[s]  
 X\_domain = 1H  
 X\_freq = 300.52965592[MHz]  
 X\_offset = 5[ppm]  
 X\_points = 16384  
 X\_prescans = 0  
 X\_resolution = 0.27518105[Hz]  
 X\_sweep = 4.50856628[kHz]  
 Clipped = FALSE  
 Mod\_return = 1  
 Scans = 8  
 Total\_scans = 8

X\_90\_width = 16[us]  
 X\_acq\_time = 3.6339712[s]  
 X\_angle = 45[deg]  
 X\_pulse = 8[us]  
 Initial\_wait = 1[s]  
 Phase\_preset = 3[us]  
 Recvr\_gain = 15  
 Relaxation\_delay = 4[s]  
 Temp\_get = 23.8[dc]  
 = 2[us]

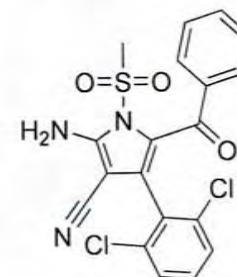

A15  
 300 MHz, DMSO-d<sub>6</sub>



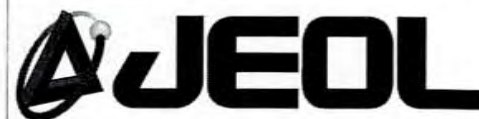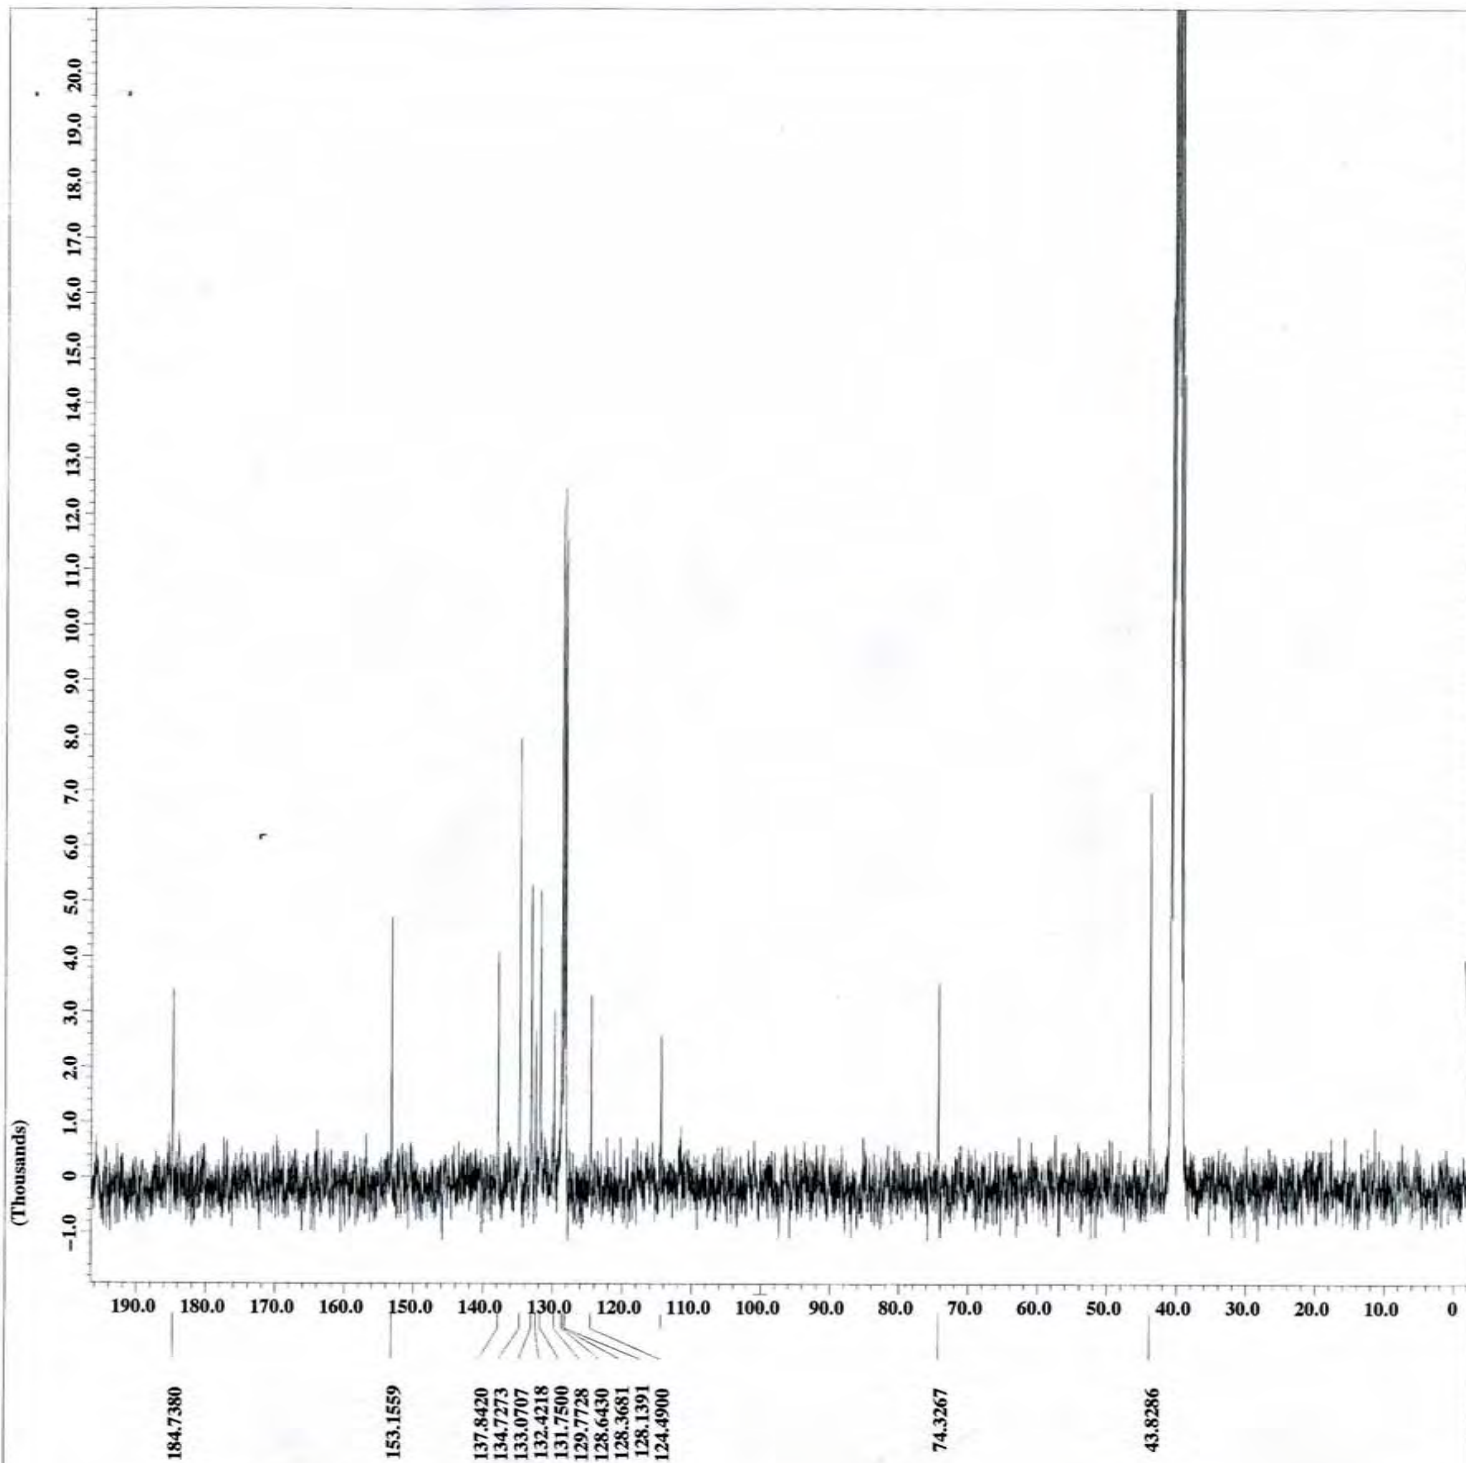

Filename = ld\_13c\_spectrum-55.jd  
Author = alex  
Experiment = single\_pulse\_dec  
Sample\_id = S#599615  
Solvent = DMSO-D6  
Creation\_time = 7-DEC-2010 17:26:48  
Revision\_time = 7-DEC-2010 17:37:36  
Current\_time = 7-DEC-2010 17:37:43

Comment = Single Pulse with Bro  
Data\_format = 1D\_COMPLEX  
Dim\_size = 32768  
Dim\_title = 13C  
Dim\_units = [ppm]  
Dimensions = X  
Site = Eclipse+ 300  
Spectrometer = DELTA\_NMR

Field\_strength = 7.0586013[T] (300[MHz])  
X\_acq\_duration = 1.7334272[s]  
X\_domain = 13C  
X\_freq = 75.56823426[MHz]  
X\_offset = 100[ppm]  
X\_points = 32768  
X\_prescans = 4  
X\_resolution = 0.57689184[Hz]  
X\_sweep = 18.90359168[kHz]  
Irr\_domain = 1H  
Irr\_freq = 300.52965592[MHz]  
Irr\_offset = 5[ppm]  
Clipped = FALSE  
Mod\_return = 1  
Scans = 1200  
Total\_scans = 1200

X\_90\_width = 8.1[us]  
X\_acq\_time = 1.7334272[s]  
X\_angle = 30[deg]  
X\_pulse = 2.7[us]  
Initial\_wait = 1[s]  
Phase\_preset = 3[us]  
Recvr\_gain = 15  
Relaxation\_delay = 1[s]

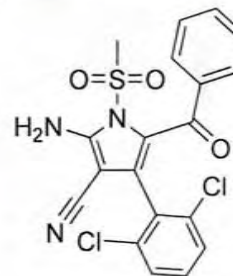

A<sub>15</sub>  
75 MHz, DMSO-d<sub>6</sub>

X : parts per Million : 13C



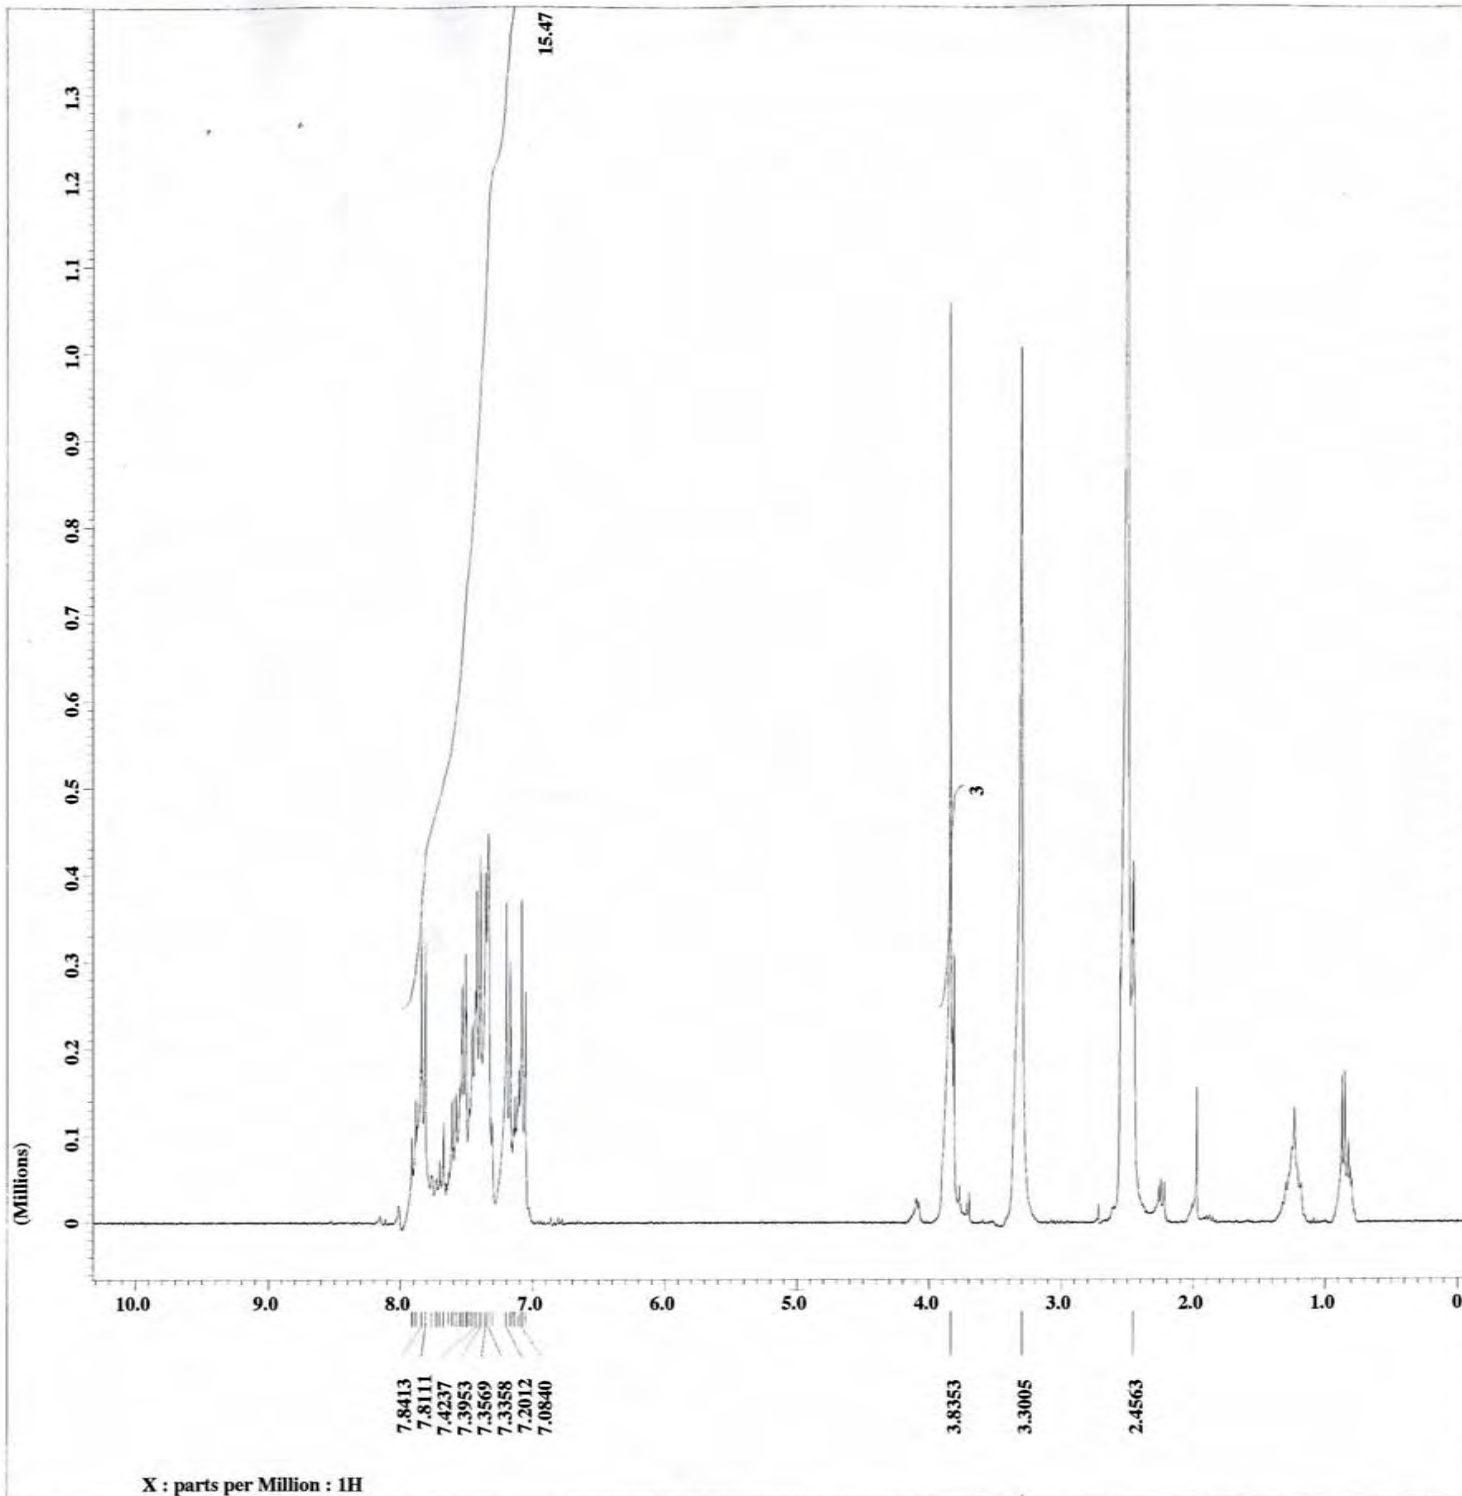

# JEOL

Filename = ld\_spectrum-173.jdf  
 Author = alex  
 Experiment = single\_pulse.exp  
 Sample\_id = S#415190  
 Solvent = DMSO-D6  
 Creation time = 14-DEC-2010 11:25:29  
 Revision time = 14-DEC-2010 11:51:28  
 Current\_time = 14-DEC-2010 11:51:44

Comment = Single Pulse Experime  
 Data\_format = 1D REAL  
 Dim\_size = 16384  
 Dim\_title = 1H  
 Dim\_units = [ppm]  
 Dimensions = X  
 Site = Eclipse+ 300  
 Spectrometer = DELTA\_NMR

Field\_strength = 7.0586013[T] (300[MHz]  
 X\_acq\_duration = 3.6339712[s]  
 X\_domain = 1H  
 X\_freq = 300.52965592[MHz]  
 X\_offset = 5[ppm]  
 X\_points = 16384  
 X\_prescans = 0  
 X\_resolution = 0.27518105[Hz]  
 X\_sweep = 4.50856628[kHz]  
 Clipped = FALSE  
 Mod\_return = 1  
 Scans = 8  
 Total\_scans = 8

X\_90\_width = 16[us]  
 X\_acq\_time = 3.6339712[s]  
 X\_angle = 45[deg]  
 X\_pulse = 8[us]  
 Initial\_wait = 1[s]  
 Phase\_preset = 3[us]  
 Recvr\_gain = 15  
 Relaxation\_delay = 4[s]

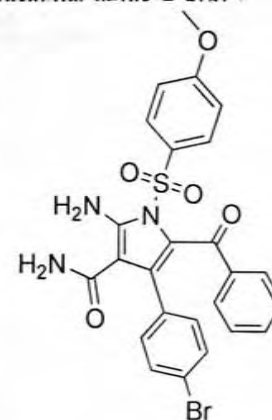

A<sub>16</sub>  
 300 MHz, DMSO-d<sub>6</sub>

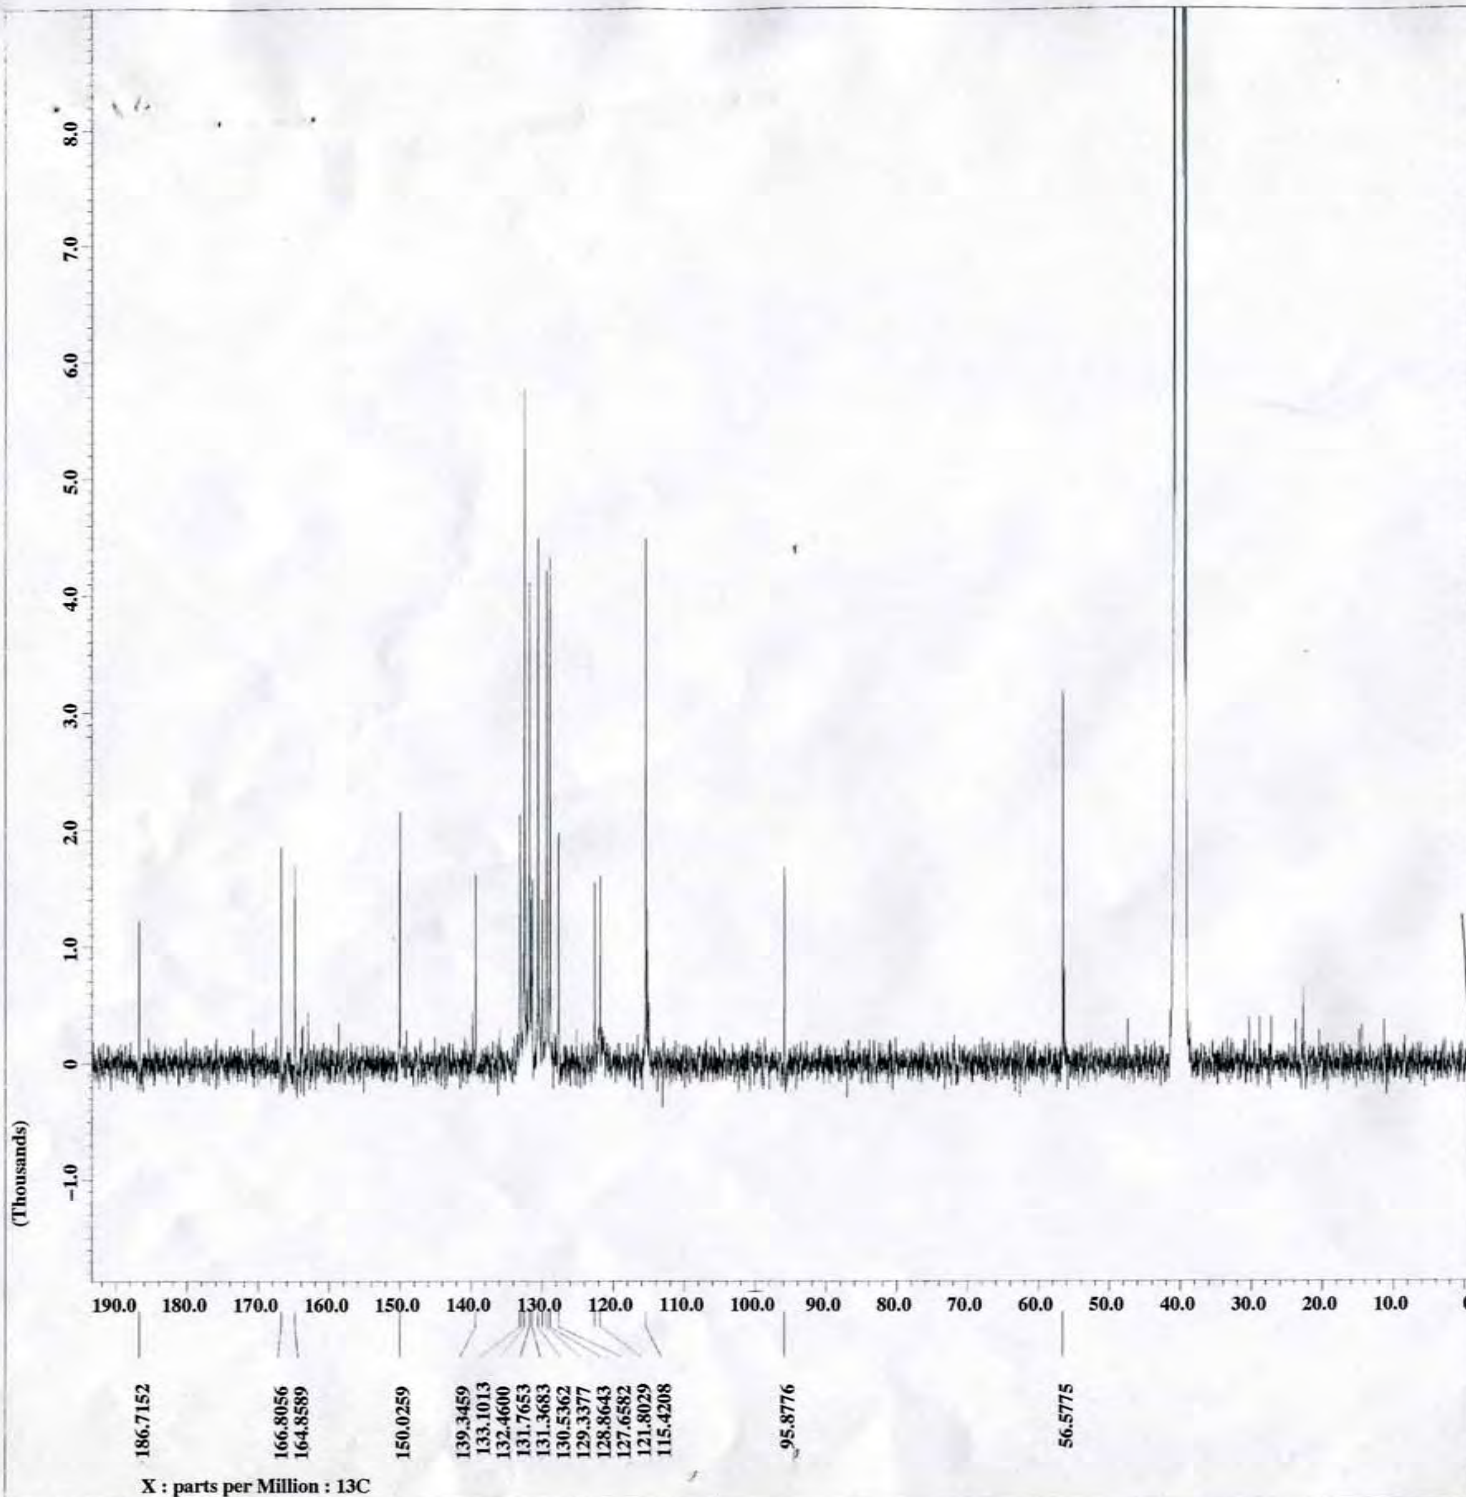

Filename = ld\_13c\_spectrum-91.jd  
 Author = alex  
 Experiment = single\_pulse\_dec  
 Sample\_id = S#638404  
 Solvent = DMSO-D6  
 Creation\_time = 12-DEC-2010 05:45:38  
 Revision\_time = 12-DEC-2010 11:27:20  
 Current\_time = 12-DEC-2010 11:27:31

Comment = Single Pulse with Bro  
 Data\_format = 1D\_REAL  
 Dim\_size = 32768  
 Dim\_title = 13C  
 Dim\_units = [ppm]  
 Dimensions = X  
 Site = Eclipse+ 300  
 Spectrometer = DELTA\_NMR

Field\_strength = 7.0586013[T] (300[MHz]  
 X\_acq\_duration = 1.7334272[s]  
 X\_domain = 13C  
 X\_freq = 75.56823426[MHz]  
 X\_offset = 100[ppm]  
 X\_points = 32768  
 X\_prescans = 4  
 X\_resolution = 0.57689184[Hz]  
 X\_sweep = 18.90359168[kHz]  
 Irr\_domain = 1H  
 Irr\_freq = 300.52965592[MHz]  
 Irr\_offset = 5[ppm]  
 Clipped = FALSE  
 Mod\_return = 1  
 Scans = 16000  
 Total\_scans = 16000

X\_90\_width = 8.1[us]  
 X\_acq\_time = 1.7334272[s]  
 X\_angle = 30[deg]  
 X\_pulse = 2.7[us]  
 Initial\_wait = 1[s]

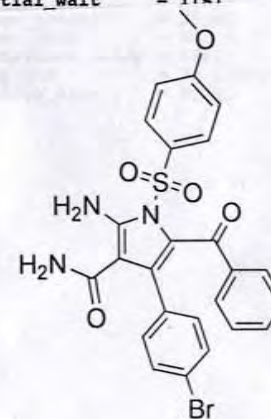

A<sub>16</sub>  
 75 MHz, DMSO-d<sub>6</sub>

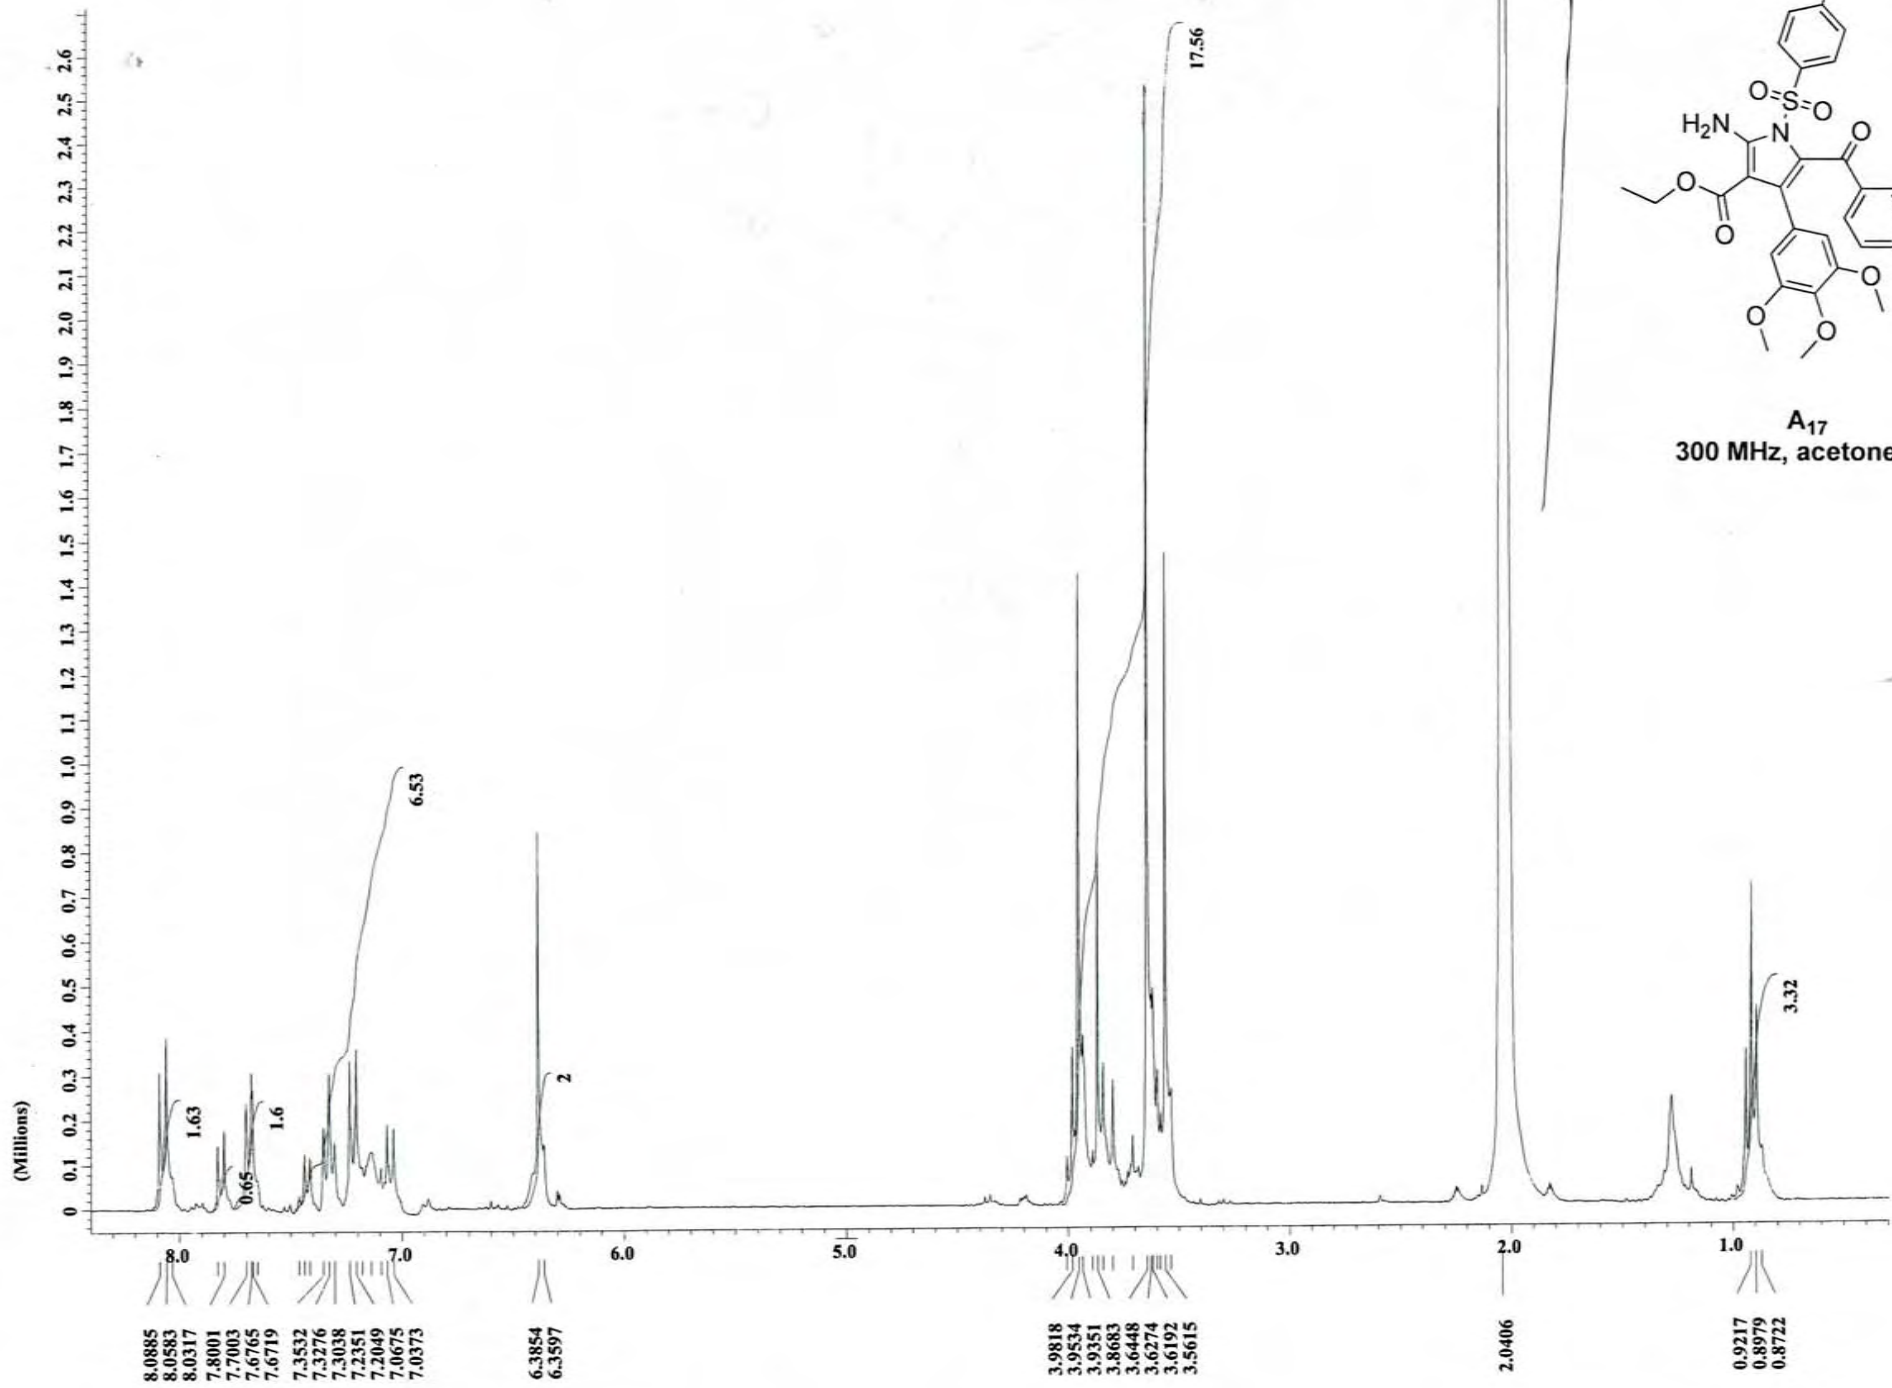

X : parts per Million : 1H



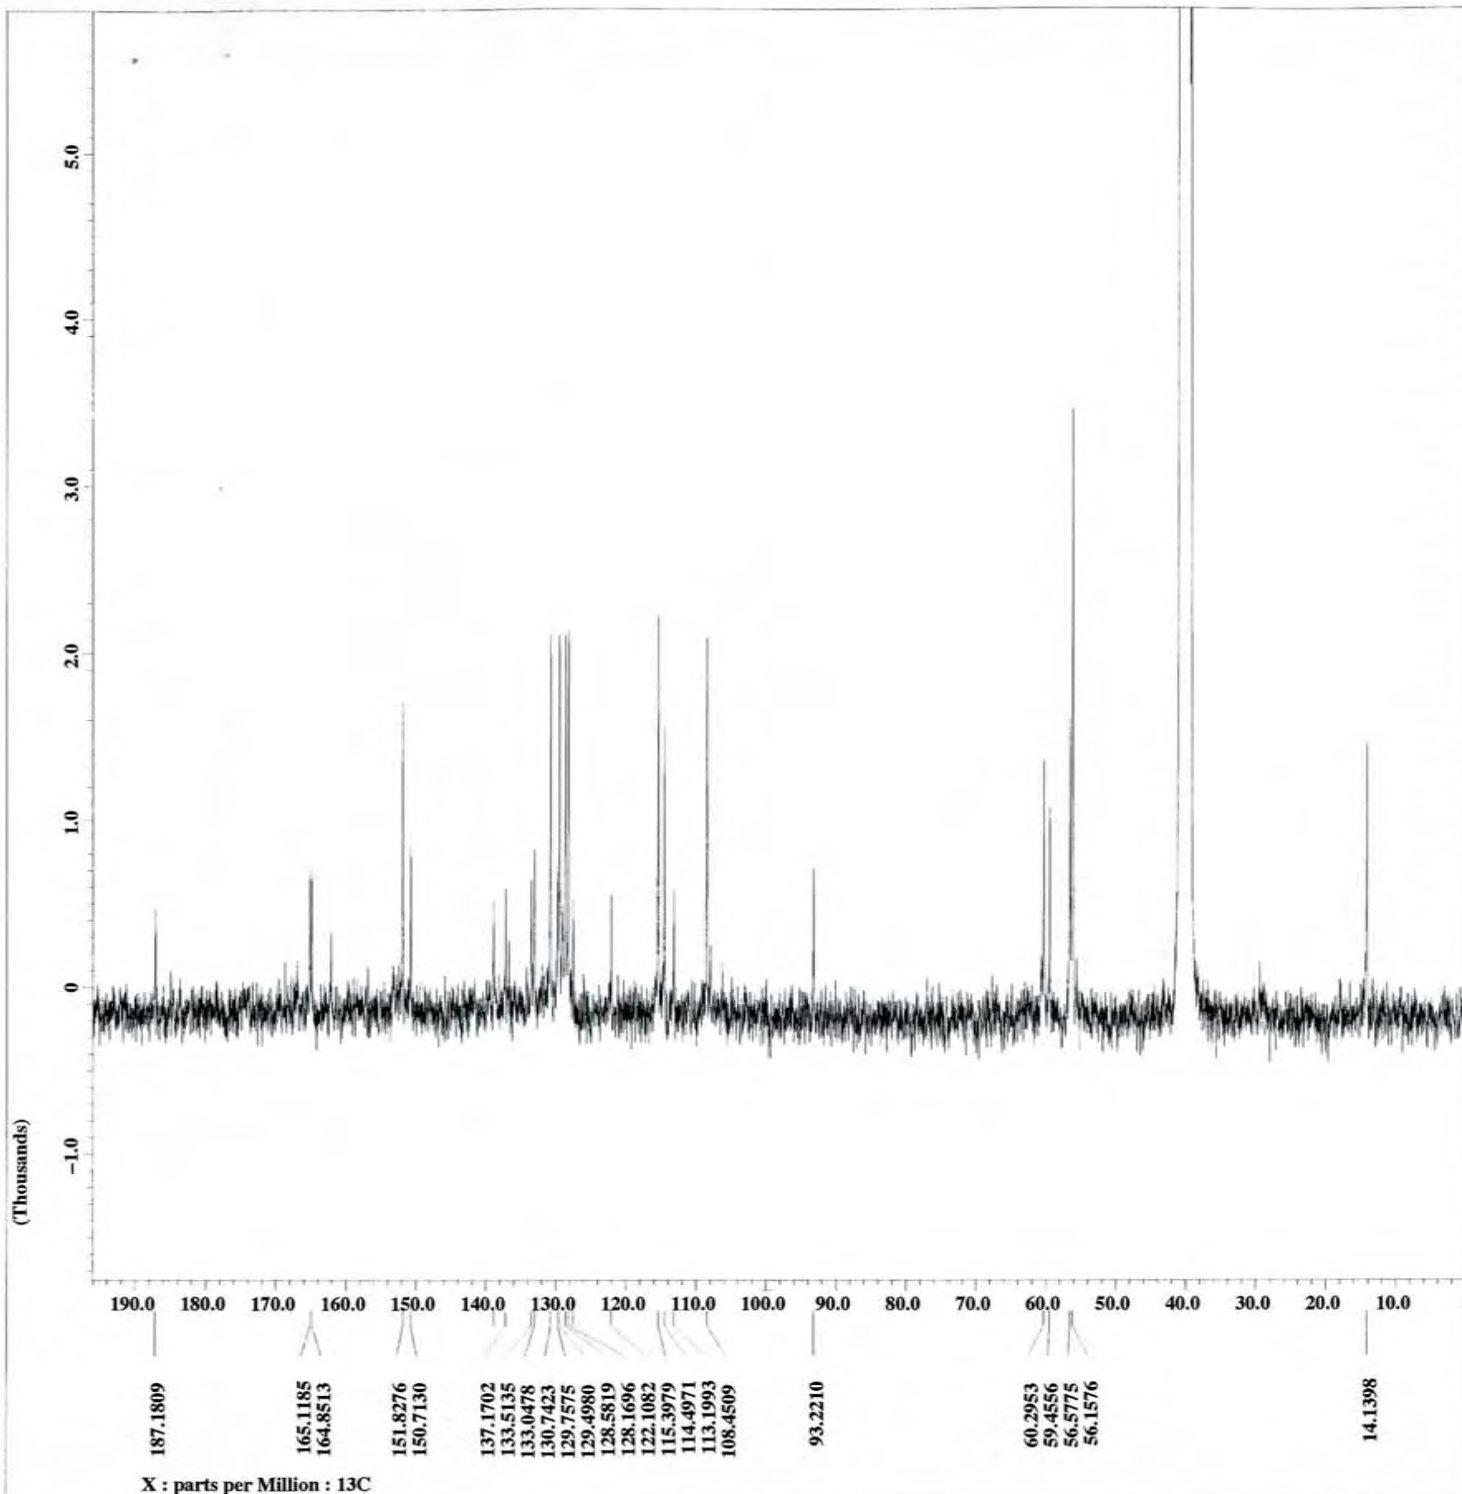

Filename = ld\_13c\_spectrum-110.j  
 Author = alex  
 Experiment = single\_pulse\_dec  
 Sample\_id = S#589070  
 Solvent = DMSO-D6  
 Creation\_time = 13-DEC-2010 07:25:39  
 Revision\_time = 20-DEC-2010 15:30:47  
 Current\_time = 20-DEC-2010 15:32:14

Comment = Single Pulse with Bro  
 Data\_format = 1D\_COMPLEX  
 Dim\_size = 32768  
 Dim\_title = 13C  
 Dim\_units = [ppm]  
 Dimensions = X  
 Site = Eclipse+ 300  
 Spectrometer = DELTA\_NMR

Field\_strength = 7.0586013[T] (300[MHz])  
 X\_acq\_duration = 1.7334272[s]  
 X\_domain = 13C  
 X\_freq = 75.56823426[MHz]  
 X\_offset = 100[ppm]  
 X\_points = 32768  
 X\_prescans = 4  
 X\_resolution = 0.57689184[Hz]  
 X\_sweep = 18.90359168[kHz]  
 Irr\_domain = 1H  
 Irr\_freq = 300.52965592[MHz]  
 Irr\_offset = 5[ppm]  
 Clipped = FALSE  
 Mod\_return = 1  
 Scans = 20000  
 Total\_scans = 20000

X\_90\_width = 8.1[us]  
 X\_acq\_time = 1.7334272[s]  
 X\_angle = 30[deg]  
 X\_pulse = 2.7[us]  
 Initial\_wait = 1[s]

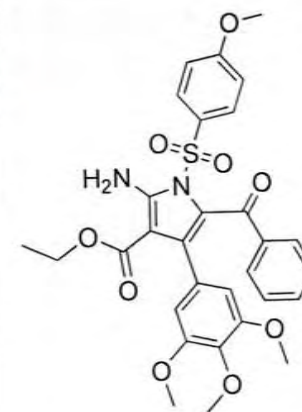

A<sub>17</sub>  
 75 MHz, DMSO-d<sub>6</sub>

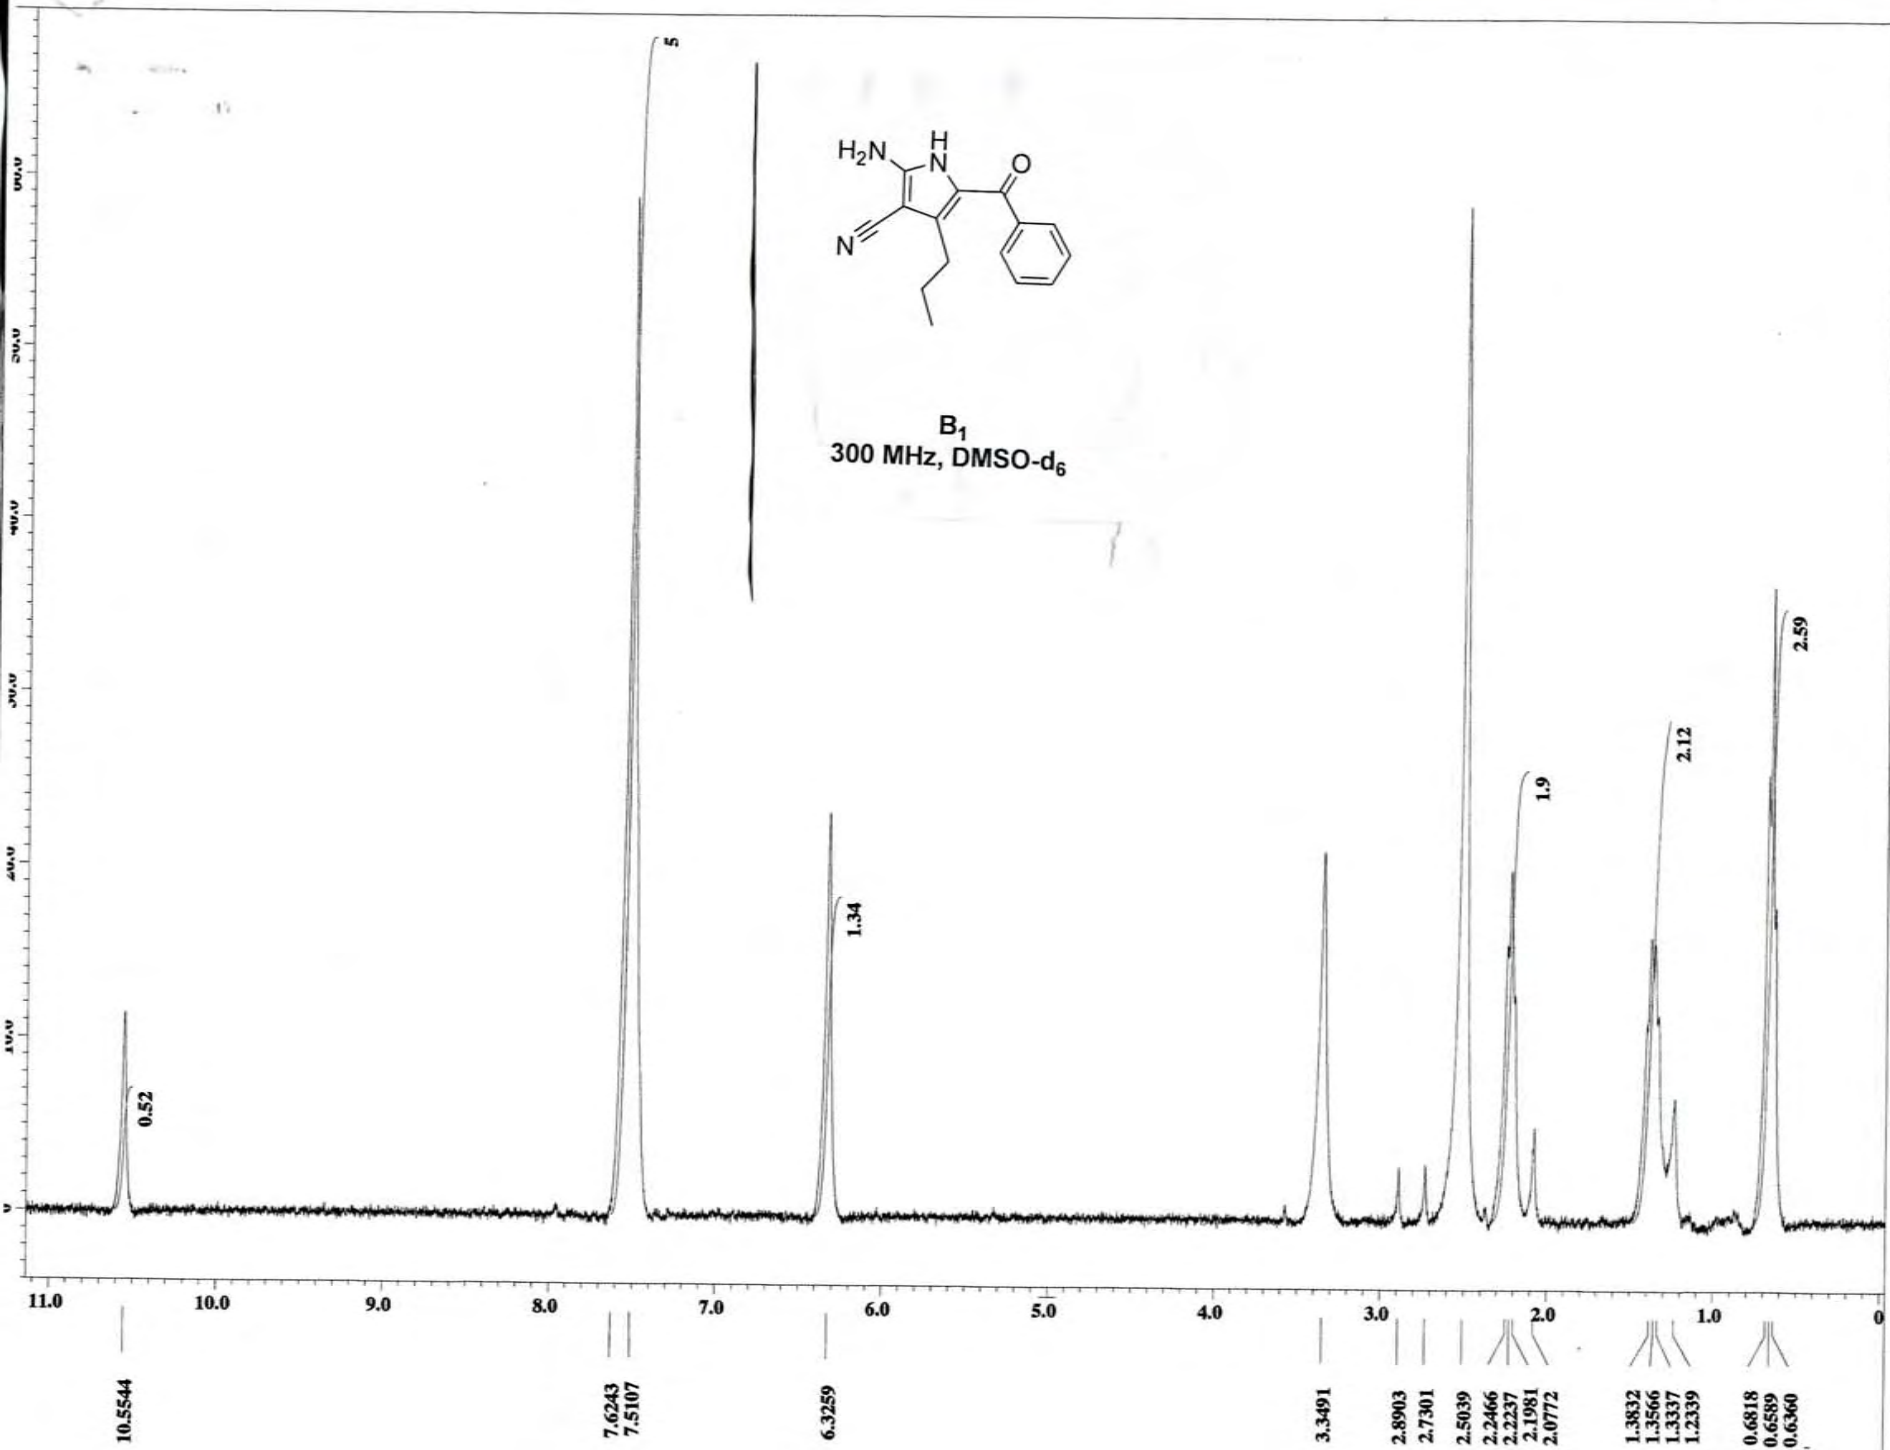

X : parts per Million : 1H

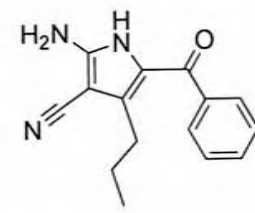

B<sub>1</sub>  
75 MHz, DMSO-d<sub>6</sub>

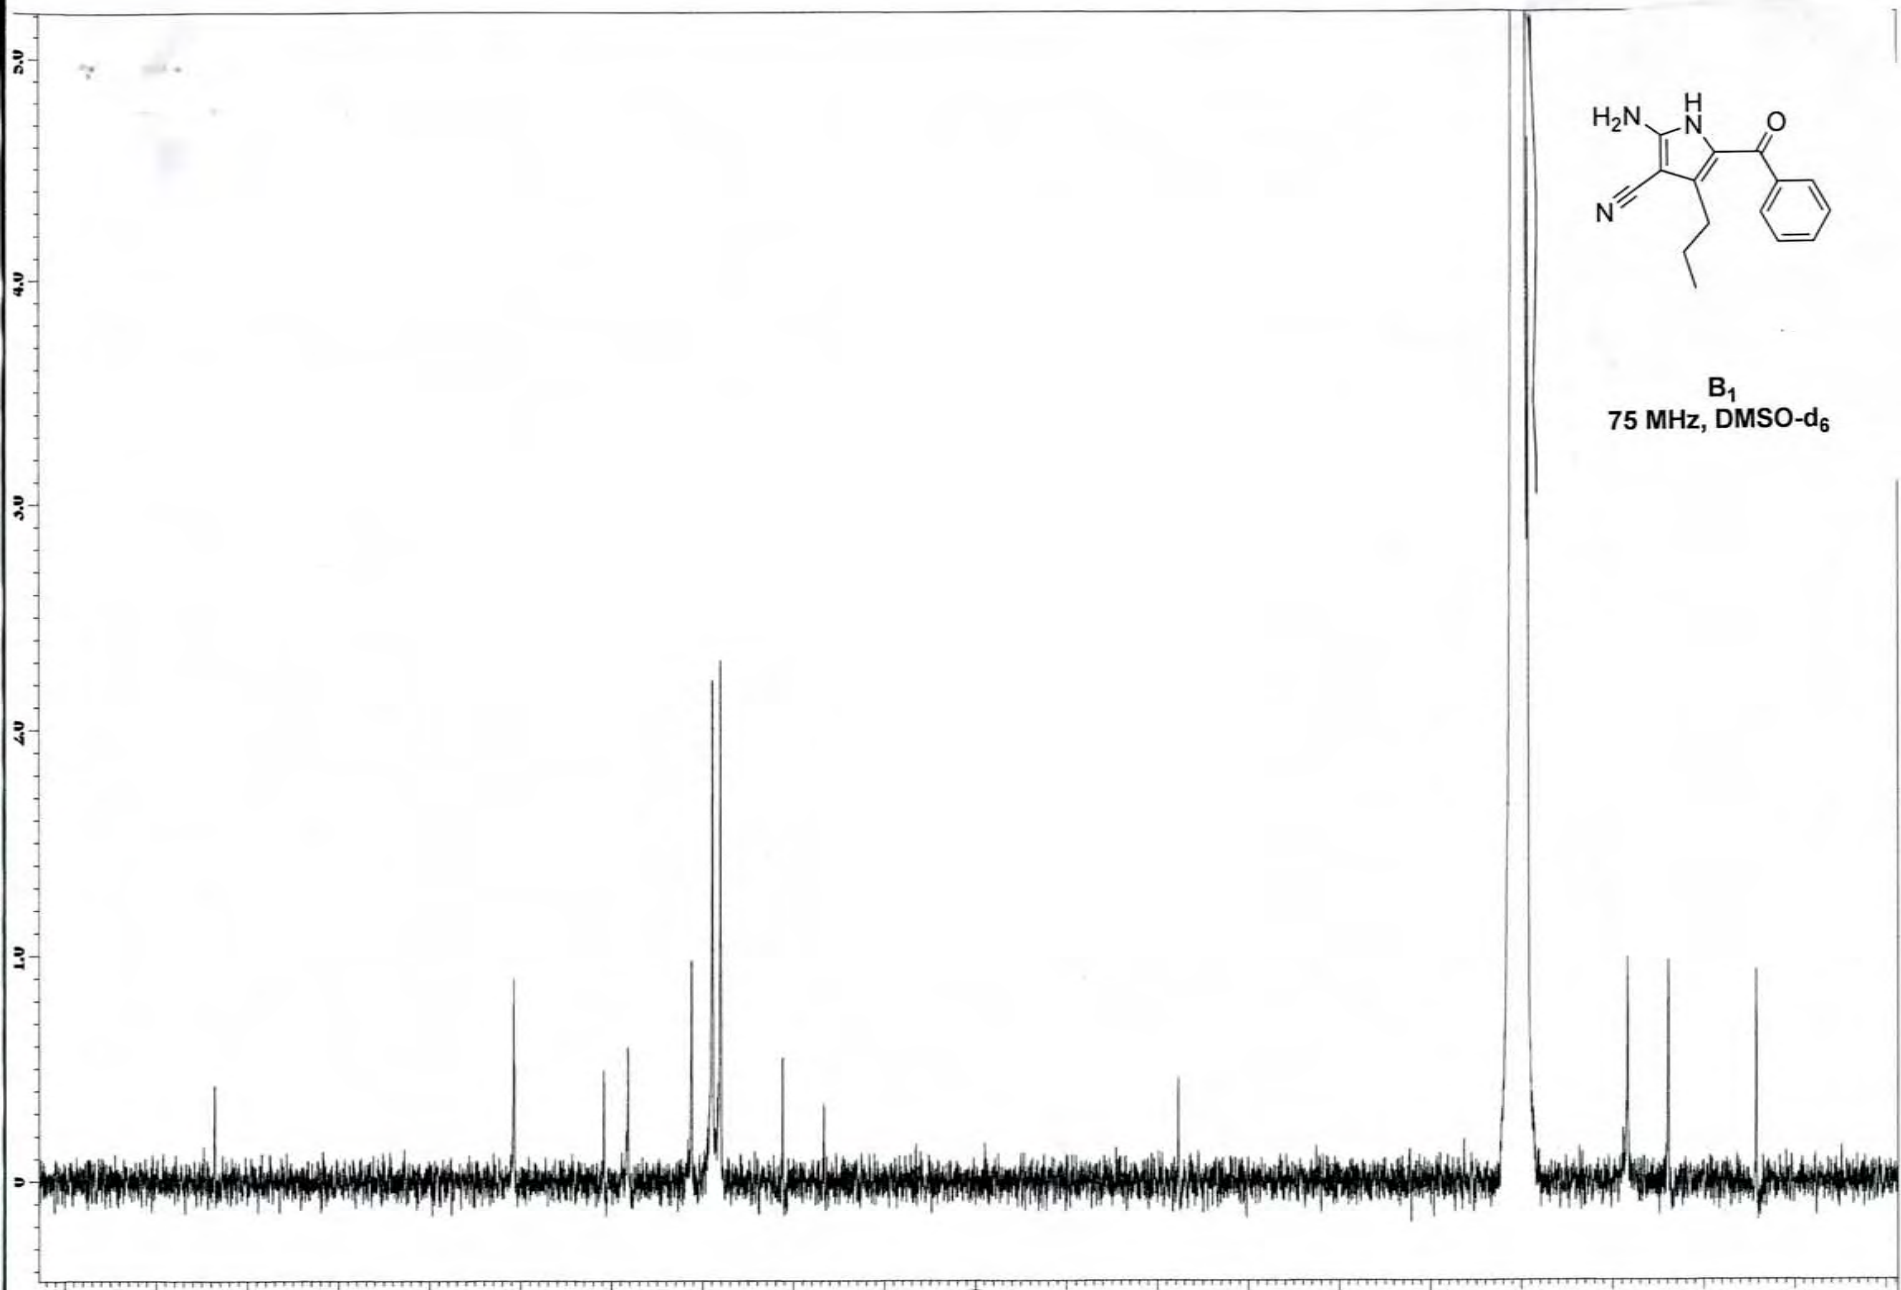

200.0 190.0 180.0 170.0 160.0 150.0 140.0 130.0 120.0 110.0 100.0 90.0 80.0 70.0 60.0 50.0 40.0 30.0 20.0 10.0 0

183.5852

150.7130

140.8269

138.1855

131.1851

128.8873

128.0017

121.1769

116.6651

77.7162

40.6605

40.3857

40.1109

39.8284

28.3544

23.9038

14.2467

X : parts per Million : 13C



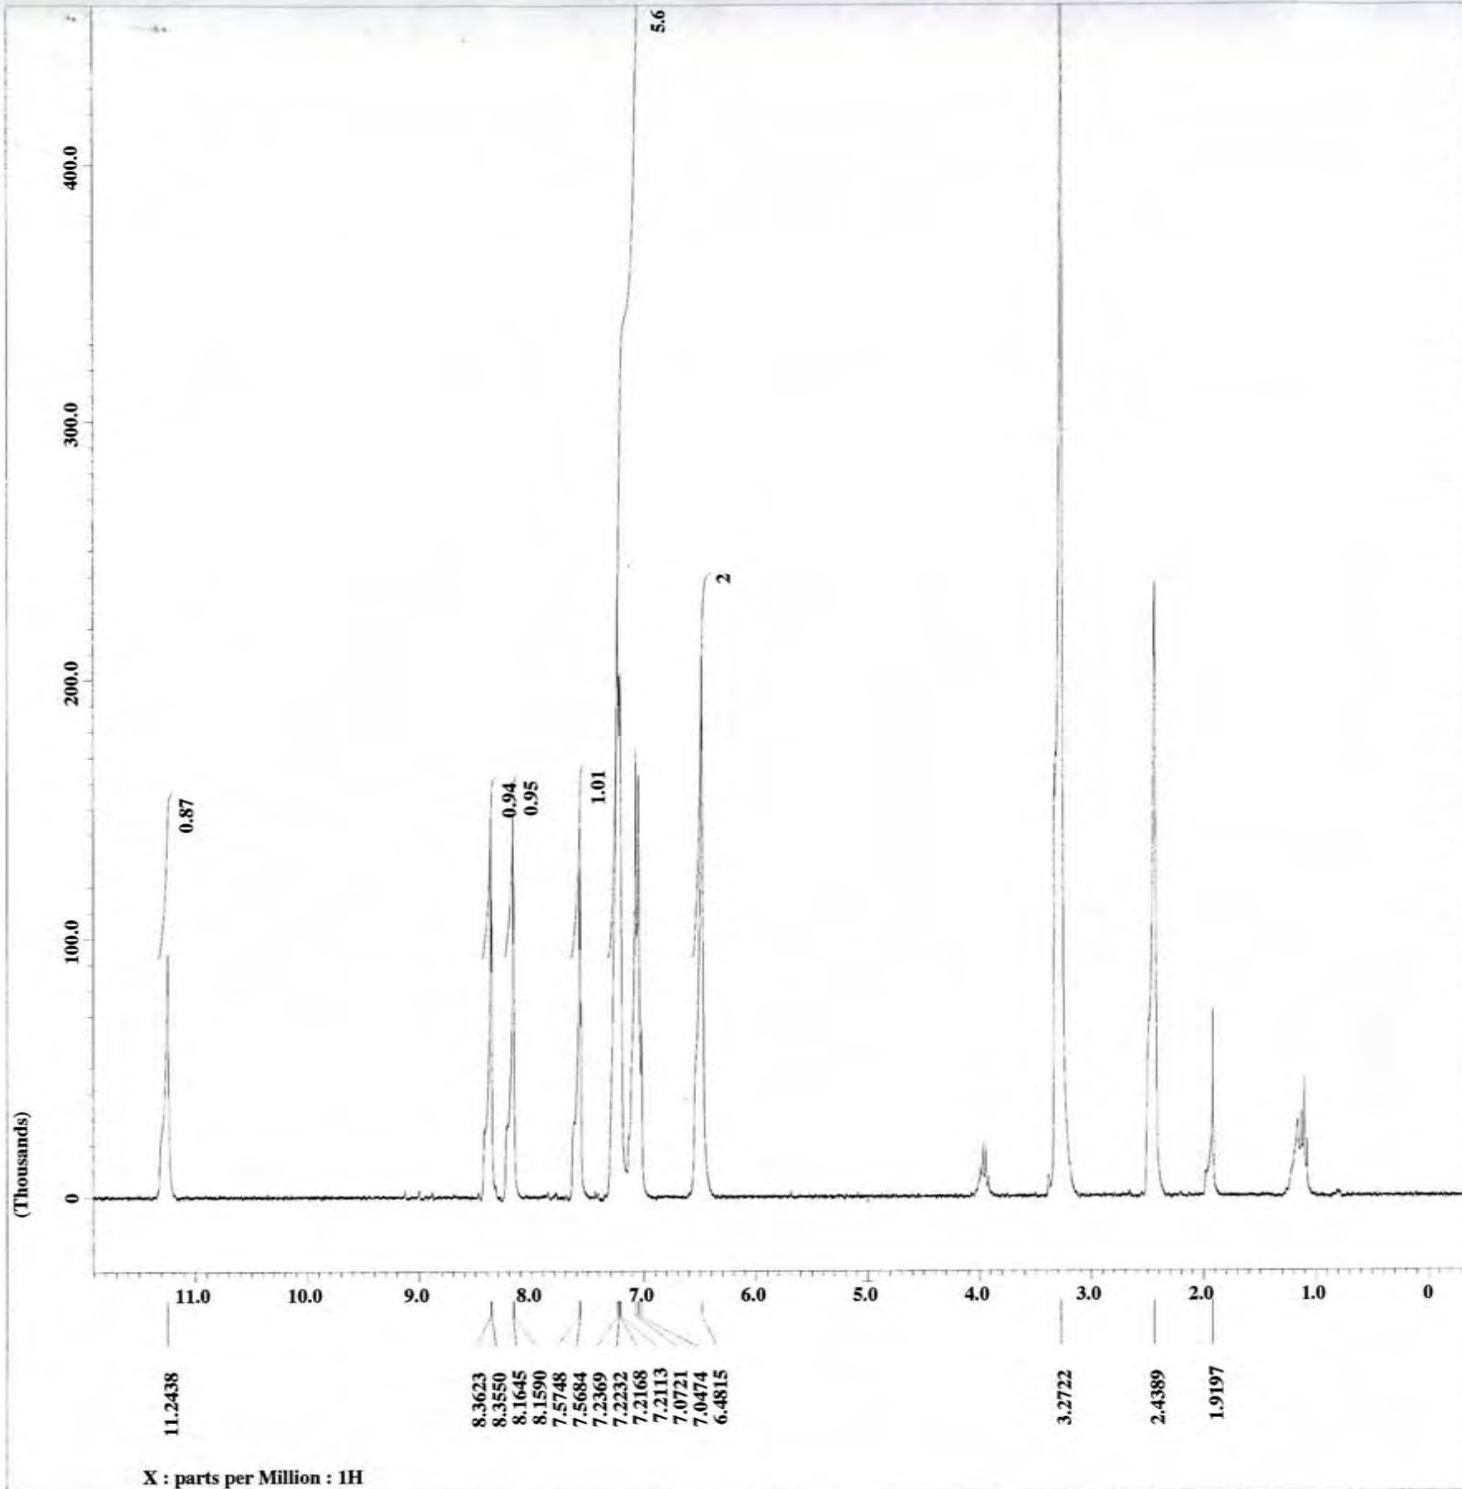

Filename = id spectrum-211.jdf  
 Author = alex  
 Experiment = single\_pulse.exp  
 Sample\_id = S#622076  
 Solvent = DMSO-D6  
 Creation\_time = 21-DEC-2010 17:11:21  
 Revision\_time = 21-DEC-2010 17:26:29  
 Current\_time = 21-DEC-2010 17:26:48

Comment = Single Pulse Experime  
 Data\_format = 1D REAL /  
 Dim\_size = 16384  
 Dim\_title = 1H  
 Dim\_units = [ppm]  
 Dimensions = X  
 Site = Eclipse+ 300  
 Spectrometer = DELTA\_NMR

Field\_strength = 7.0586013[T] (300[MHz]  
 X\_acq\_duration = 3.6339712[s]  
 X\_domain = 1H  
 X\_freq = 300.52965592[MHz]  
 X\_offset = 5[ppm]  
 X\_points = 16384  
 X\_prescans = 0  
 X\_resolution = 0.27518105[Hz]  
 X\_sweep = 4.50856628[kHz]  
 Clipped = FALSE  
 Mod\_return = 1  
 Scans = 16  
 Total\_scans = 16

X\_90\_width = 16[us]  
 X\_acq\_time = 3.6339712[s]  
 X\_angle = 45[deg]  
 X\_pulse = 8[us]  
 Initial\_wait = 1[s]  
 Phase\_preset = 3[us]  
 Recvr\_gain = 15  
 Relaxation\_delay = 4[s]  
 Temp\_get = 23.7[dC]  
 Unblank\_time = 2[us]

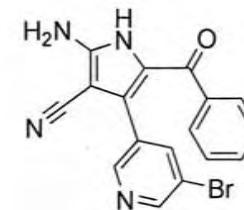

B<sub>2</sub>  
 300 MHz, DMSO-d<sub>6</sub>

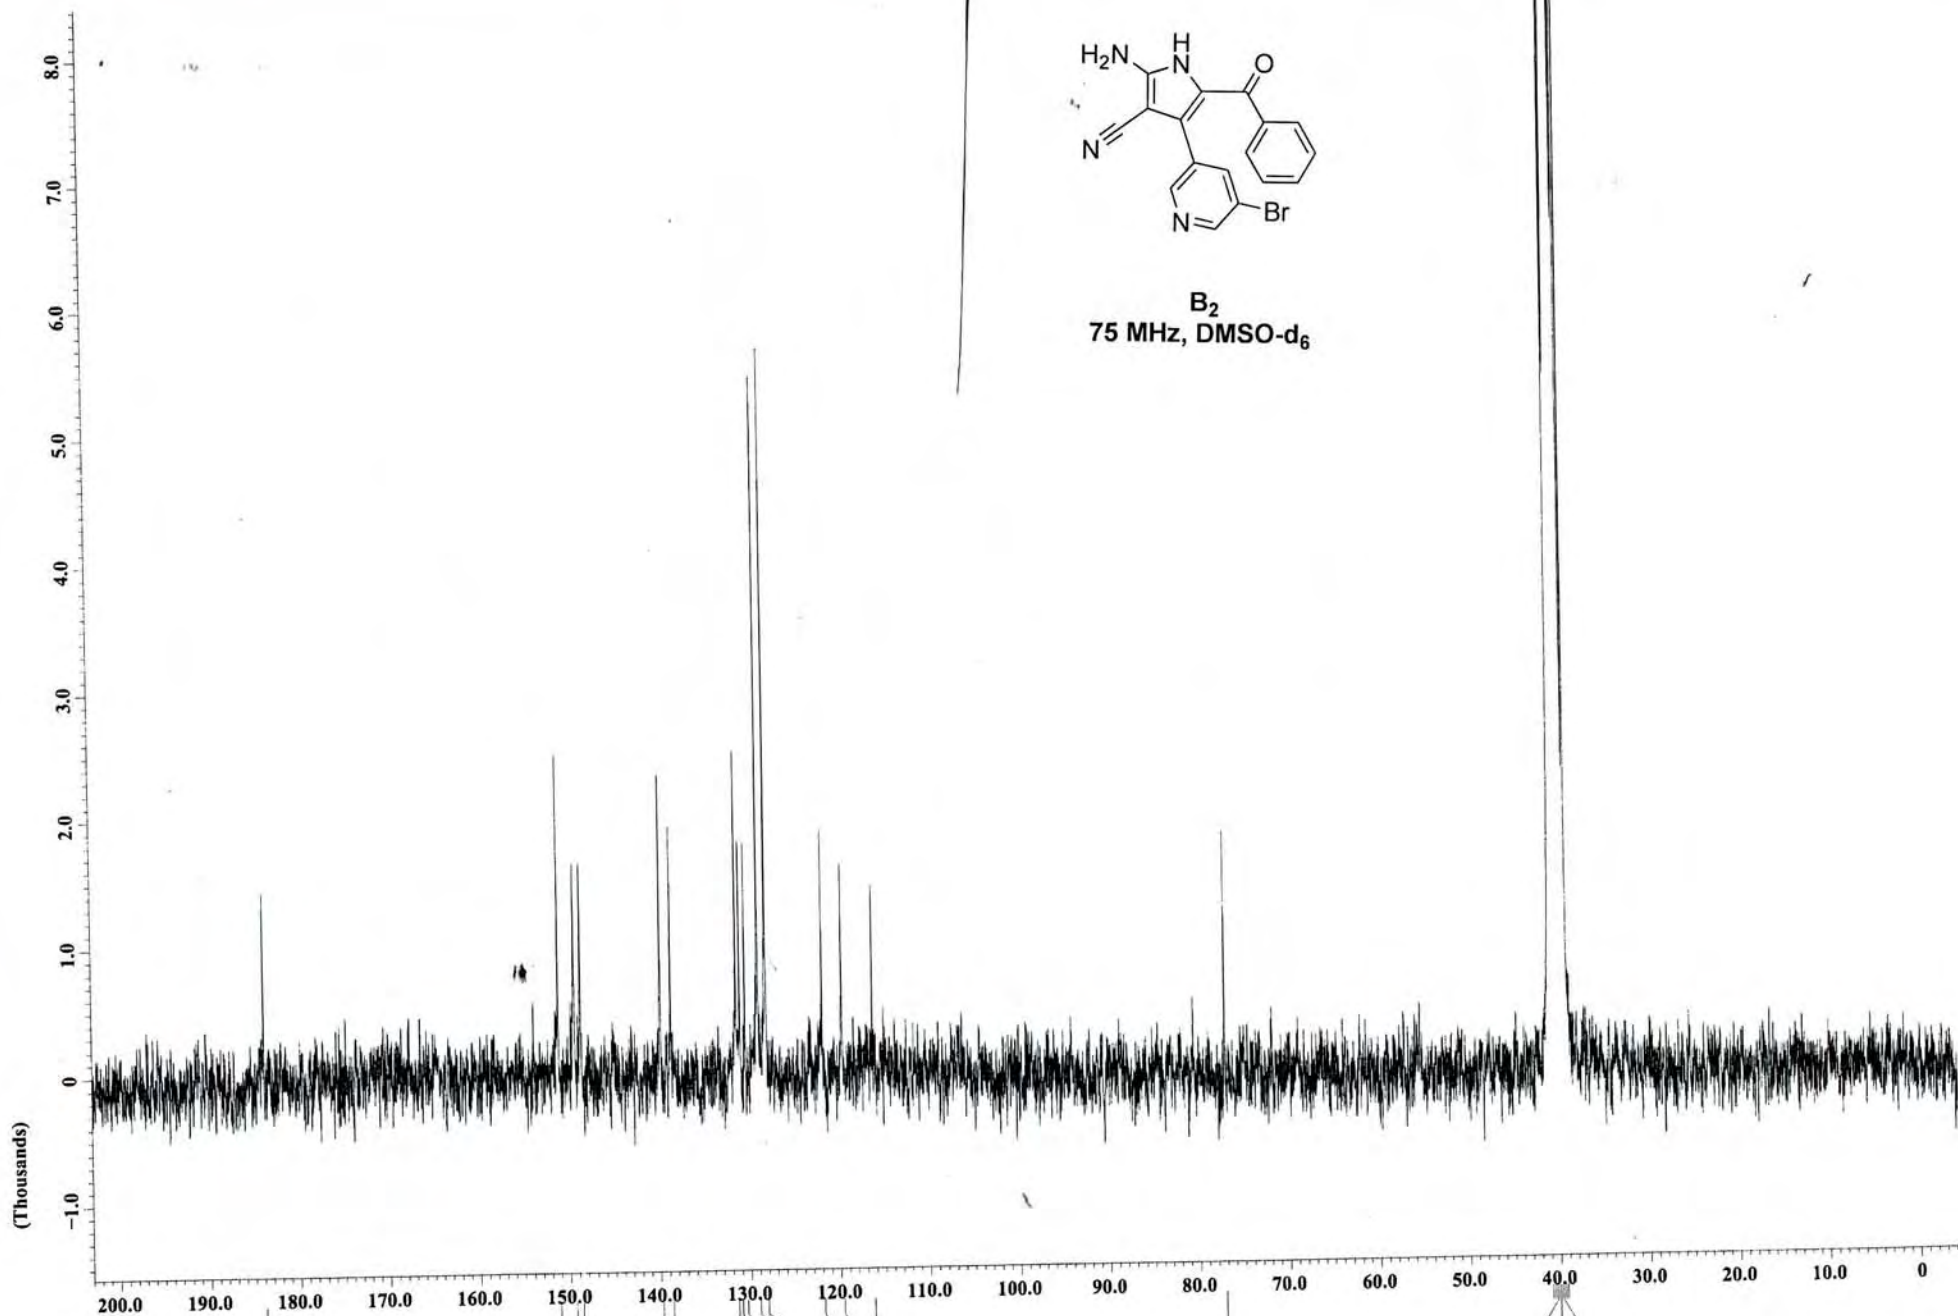

B3

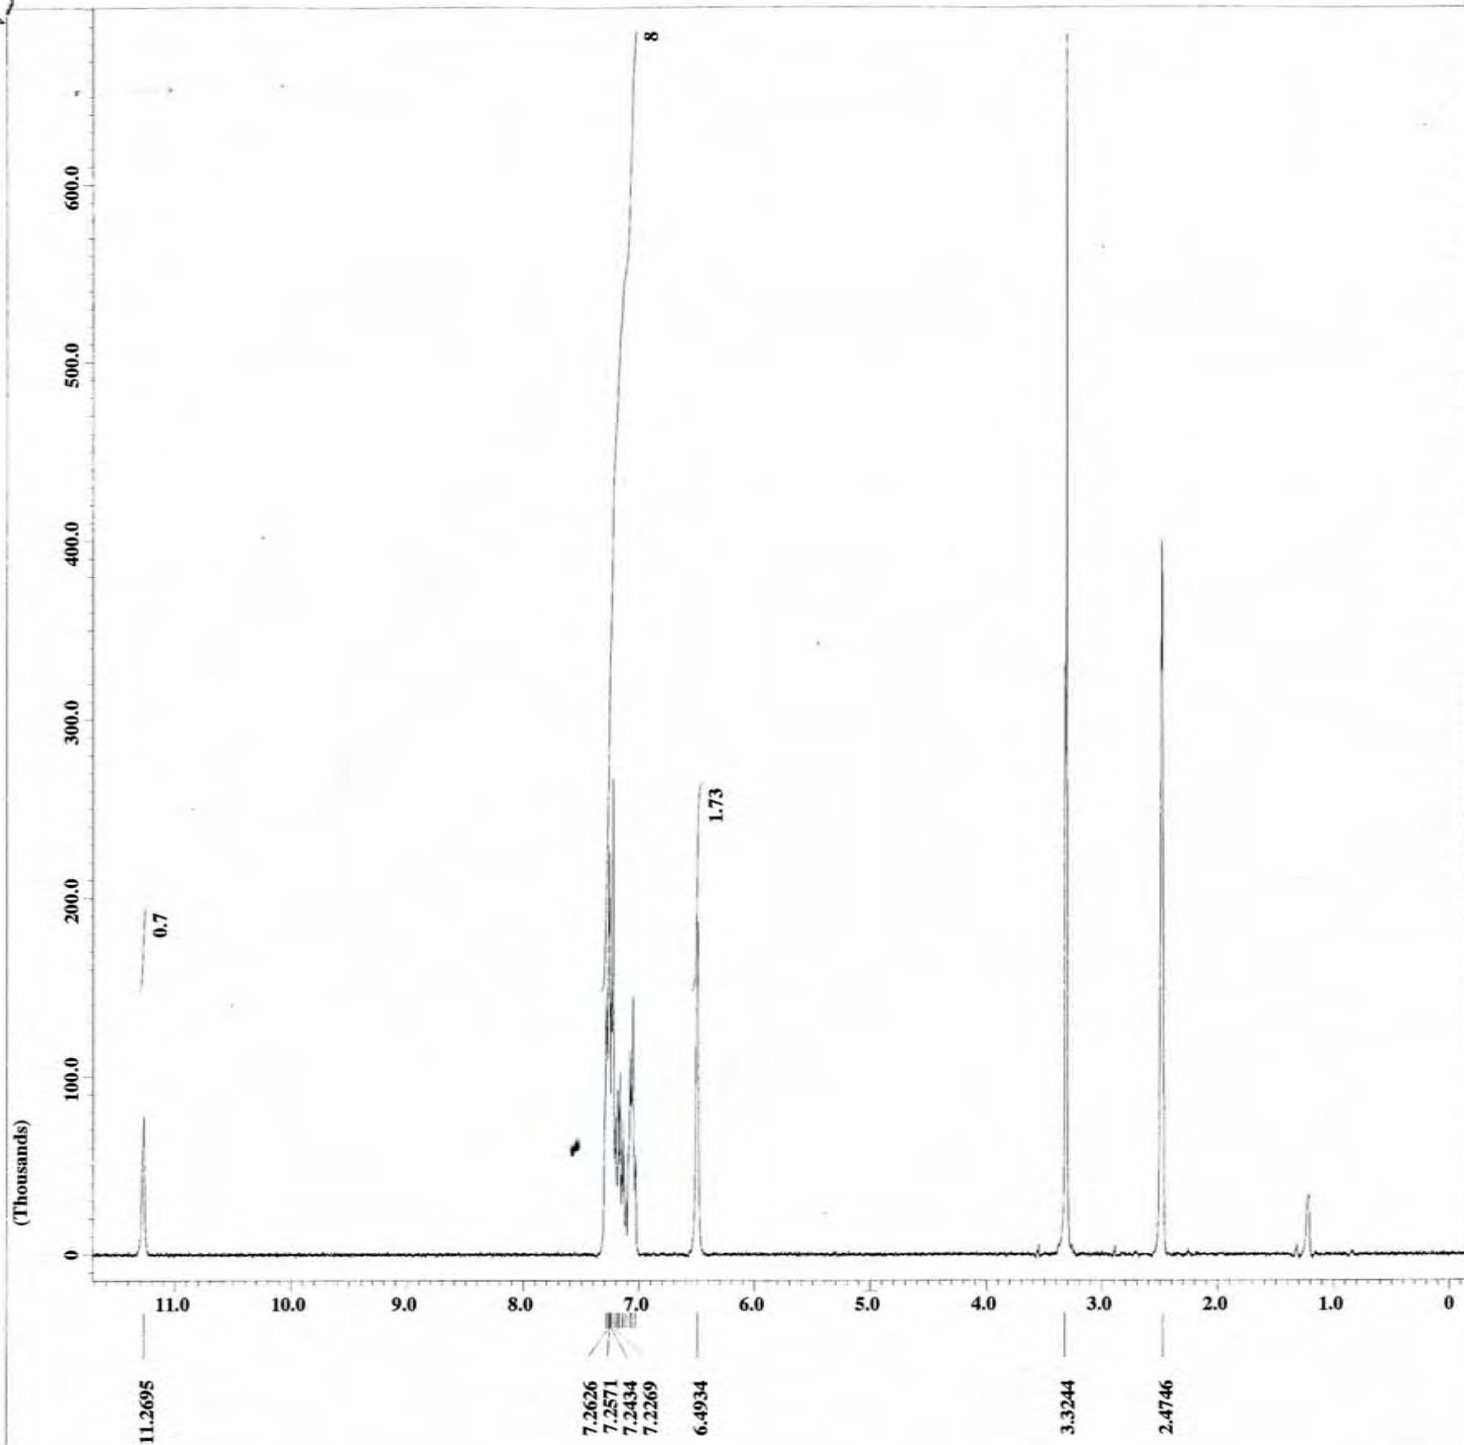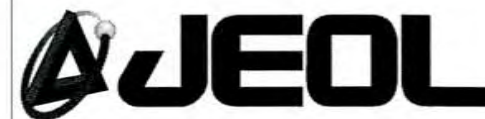

Filename = 1d\_spectrum-151.jdf  
 Author = alex  
 Experiment = single\_pulse.exp  
 Sample\_id = S#705386  
 Solvent = DMSO-D6  
 Creation\_time = 10-DEC-2010 19:29:07  
 Revision\_time = 11-DEC-2010 14:03:14  
 Current\_time = 11-DEC-2010 14:03:21

Comment = Single Pulse Experime  
 Data\_format = 1D REAL  
 Dim\_size = 16384  
 Dim\_title = 1H  
 Dim\_units = [ppm]  
 Dimensions = X  
 Site = Eclipse+ 300  
 Spectrometer = DELTA\_NMR

Field\_strength = 7.0586013[T] (300[MHz]  
 X\_acq\_duration = 3.6339712[s]  
 X\_domain = 1H  
 X\_freq = 300.52965592[MHz]  
 X\_offset = 5[ppm]  
 X\_points = 16384  
 X\_prescans = 0  
 X\_resolution = 0.27518105[Hz]  
 X\_sweep = 4.50856628[kHz]  
 Clipped = FALSE  
 Mod\_return = 1  
 Scans = 8  
 Total\_scans = 8

X\_90\_width = 16[us]  
 X\_acq\_time = 3.6339712[s]  
 X\_angle = 45[deg]  
 X\_pulse = 8[us]  
 Initial\_wait = 1[s]  
 Phase\_preset = 3[us]  
 Recvr\_gain = 15  
 Relaxation\_delay = 4[s]  
 Temp\_get = 22.7[dC]  
 Unblank\_time = 2[us]

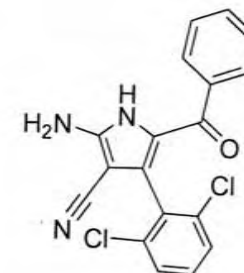

B<sub>3</sub>  
 300 MHz, DMSO-d<sub>6</sub>



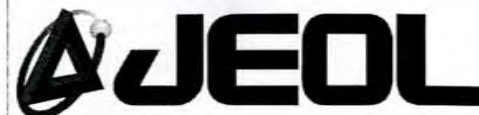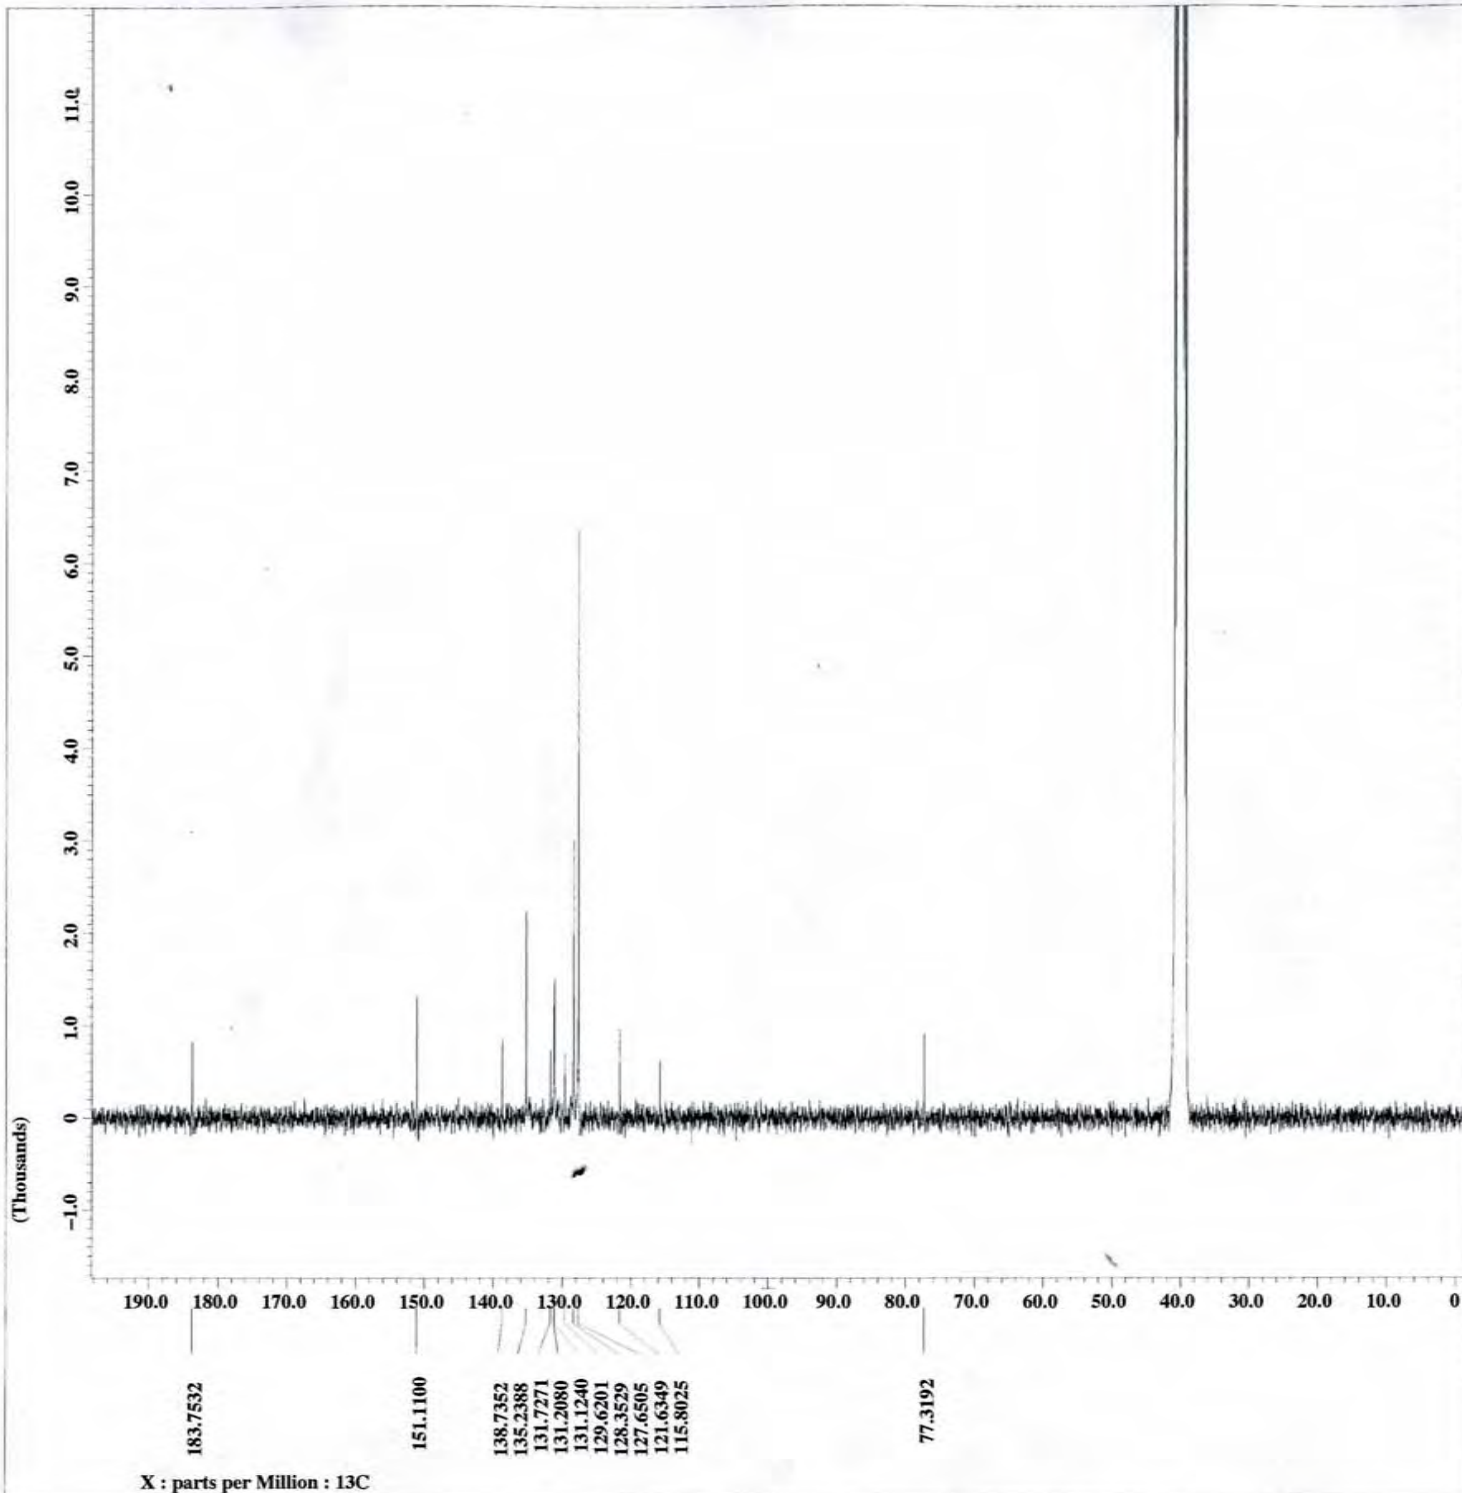

Filename = 1d\_13c\_spectrum-86.jd  
Author = alex  
Experiment = single\_pulse\_dec  
Sample\_id = S#706810  
Solvent = DMSO-D6  
Creation time = 11-DEC-2010 10:41:50  
Revision time = 11-DEC-2010 13:49:26  
Current\_time = 11-DEC-2010 13:49:53

Comment = Single Pulse with Bro  
Data\_format = 1D\_REAL  
Dim\_size = 32768  
Dim\_title = 13C  
Dim\_units = [ppm]  
Dimensions = X  
Site = Eclipse+ 300  
Spectrometer = DELTA\_NMR

Field\_strength = 7.0586013[T] (300[MHz])  
X\_acq\_duration = 1.7334272[s]  
X\_domain = 13C  
X\_freq = 75.56823426[MHz]  
X\_offset = 100[ppm]  
X\_points = 32768  
X\_prescans = 4  
X\_resolution = 0.57689184[Hz]  
X\_sweep = 18.90359168[kHz]  
Irr\_domain = 1H  
Irr\_freq = 300.52965592[MHz]  
Irr\_offset = 5[ppm]  
Clipped = FALSE  
Mod\_return = 1  
Scans = 20000  
Total\_scans = 20000

X\_90\_width = 8.1[us]  
X\_acq\_time = 1.7334272[s]  
X\_angle = 30[deg]  
X\_pulse = 2.7[us]  
Initial\_wait = 1[s]  
Phase\_preset = 3[us]  
Recvr\_gain = 15  
Relaxation\_delay = 1[s]  
Temp\_get = 23[dc]

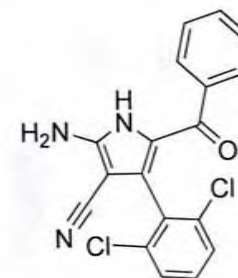

B<sub>3</sub>  
75 MHz, DMSO-d<sub>6</sub>



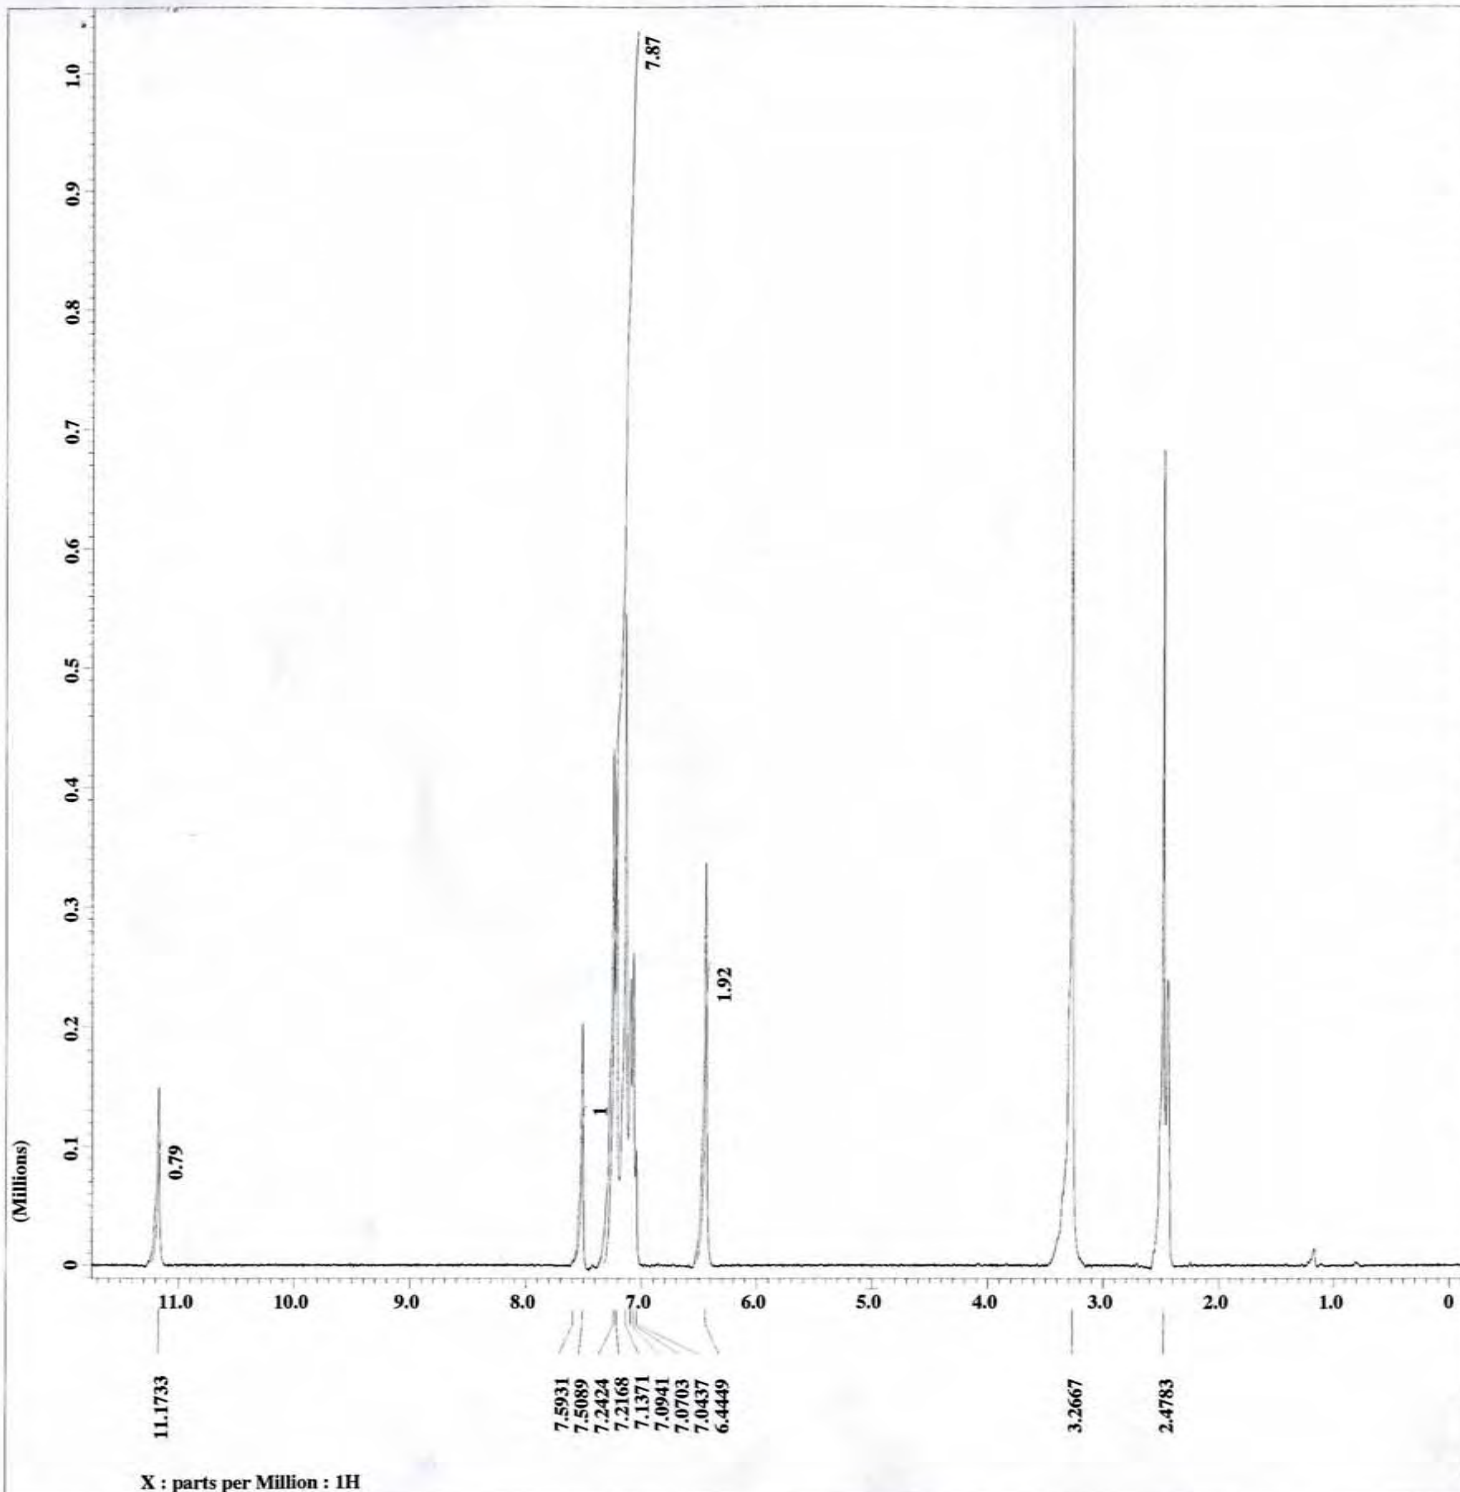

Filename = ld\_spectrum-203.jdf  
 Author = alex  
 Experiment = single\_pulse.exp  
 Sample\_id = S#616018  
 Solvent = DMSO-D6  
 Creation\_time = 20-DEC-2010 17:00:15  
 Revision\_time = 20-DEC-2010 17:13:25  
 Current\_time = 20-DEC-2010 17:13:58

Comment = Single Pulse Experime  
 Data\_format = 1D\_REAL  
 Dim\_size = 16384  
 Dim\_title = 1H  
 Dim\_units = [ppm]  
 Dimensions = X  
 Site = Eclipse+ 300  
 Spectrometer = DELTA\_NMR

Field\_strength = 7.0586013[T] (300[MHz])  
 X\_acq\_duration = 3.6339712[s]  
 X\_domain = 1H  
 X\_freq = 300.52965592[MHz]  
 X\_offset = 5[ppm]  
 X\_points = 16384  
 X\_prescans = 0  
 X\_resolution = 0.27518105[Hz]  
 X\_sweep = 4.50856628[kHz]  
 Clipped = FALSE  
 Mod\_return = 1  
 Scans = 8  
 Total\_scans = 8

X\_90\_width = 16[us]  
 X\_acq\_time = 3.6339712[s]  
 X\_angle = 45[deg]  
 X\_pulse = 8[us]  
 Initial\_wait = 1[s]  
 Phase\_preset = 3[us]  
 Recvr\_gain = 15  
 Relaxation\_delay = 4[s]  
 Temp\_get = 24.4[dC]  
 Unblank\_time = 2[us]

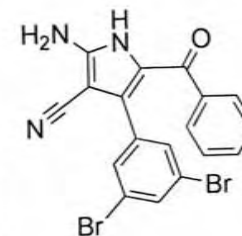

B<sub>4</sub>  
 300 MHz, DMSO-d<sub>6</sub>

X : parts per Million : 1H

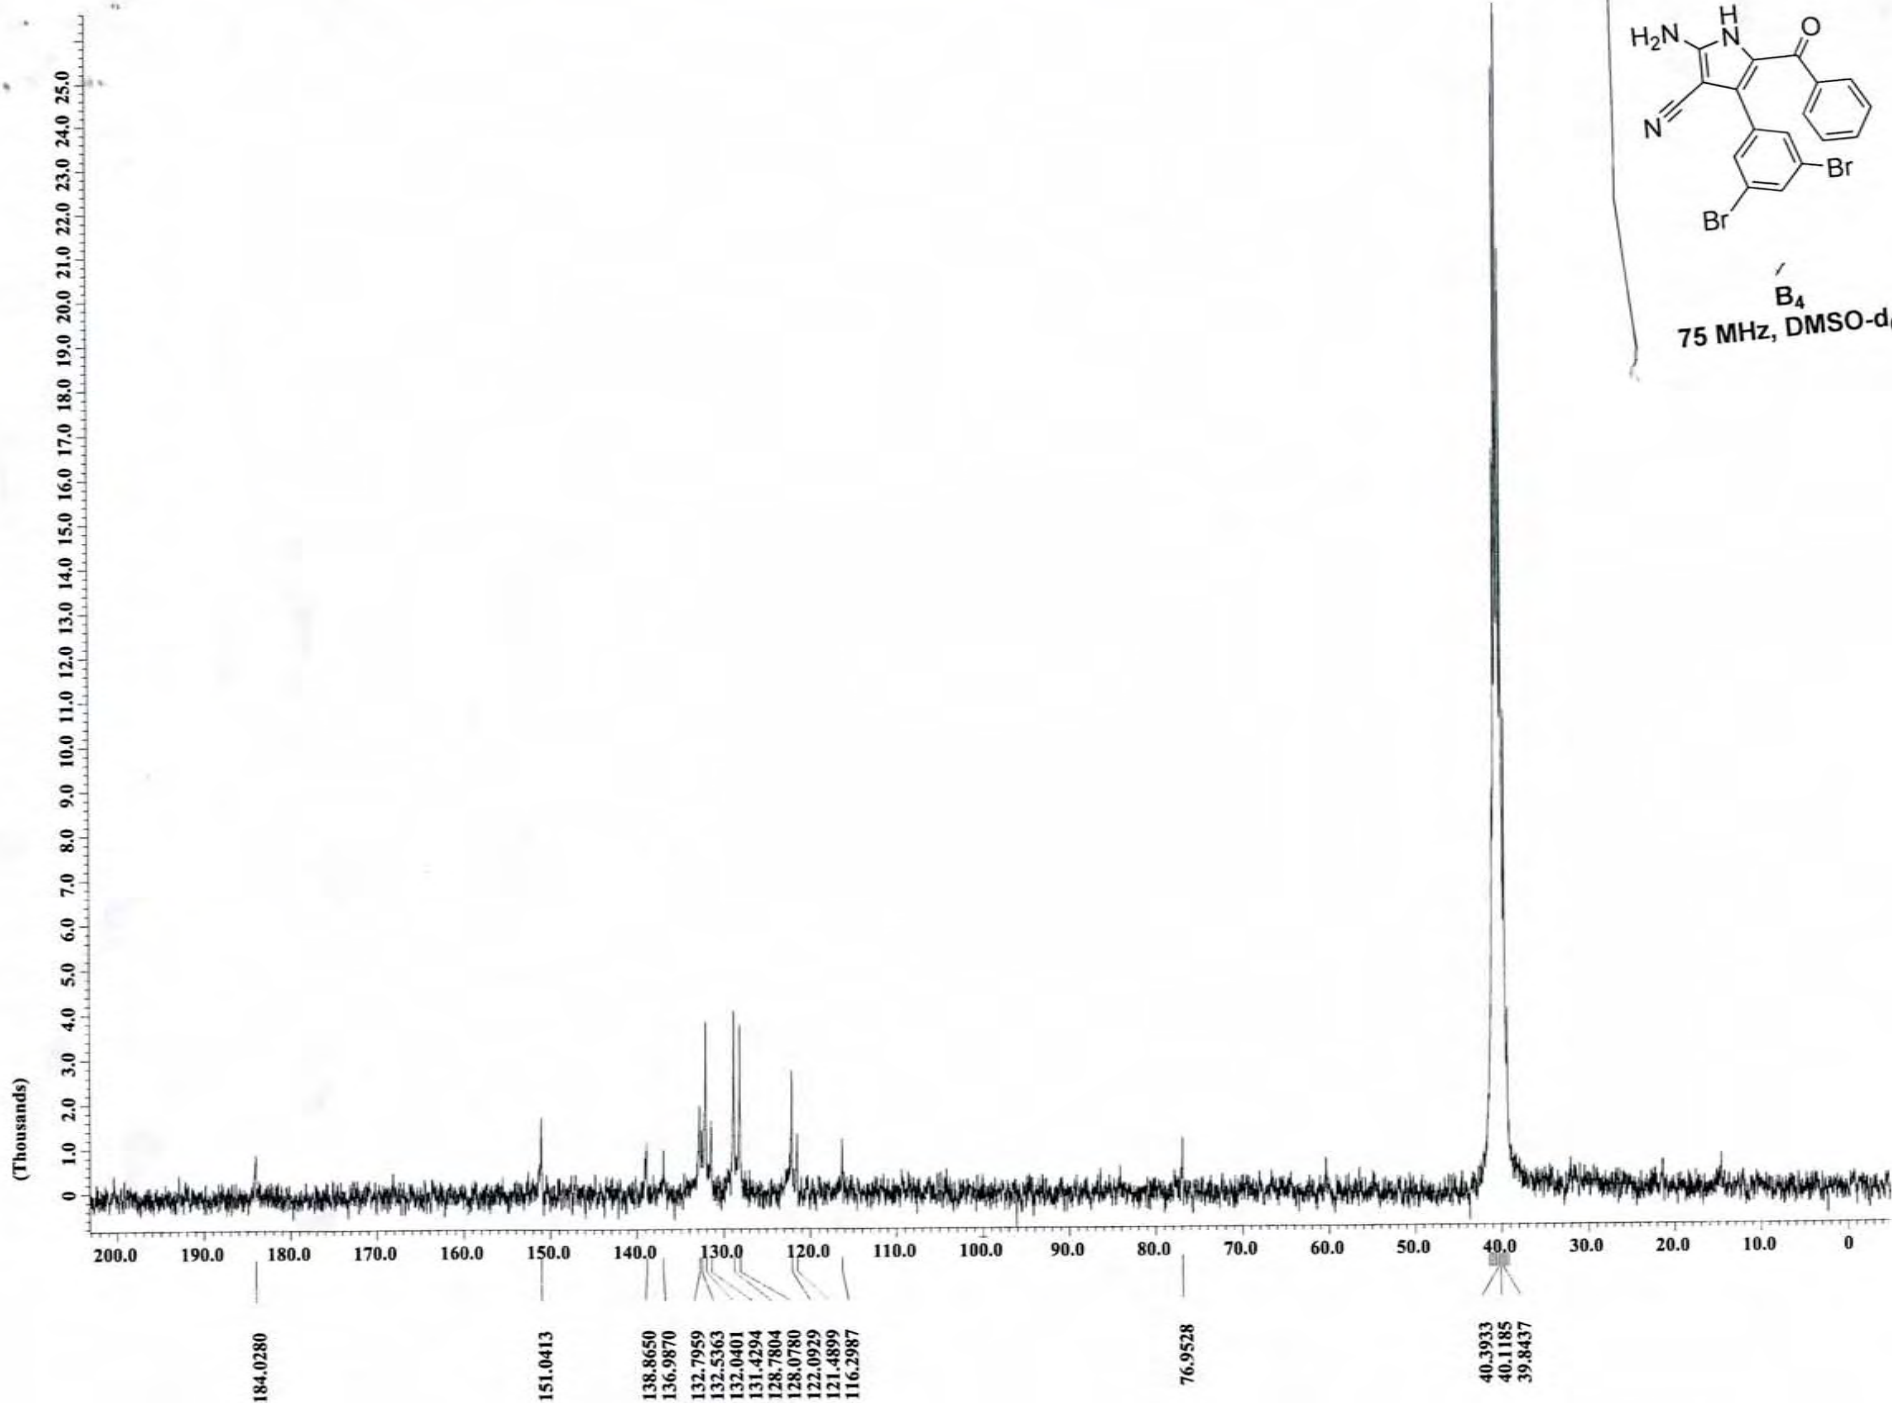

X : parts per Million : 13C

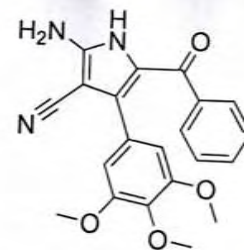

300 MHz, DMSO-d<sub>6</sub>

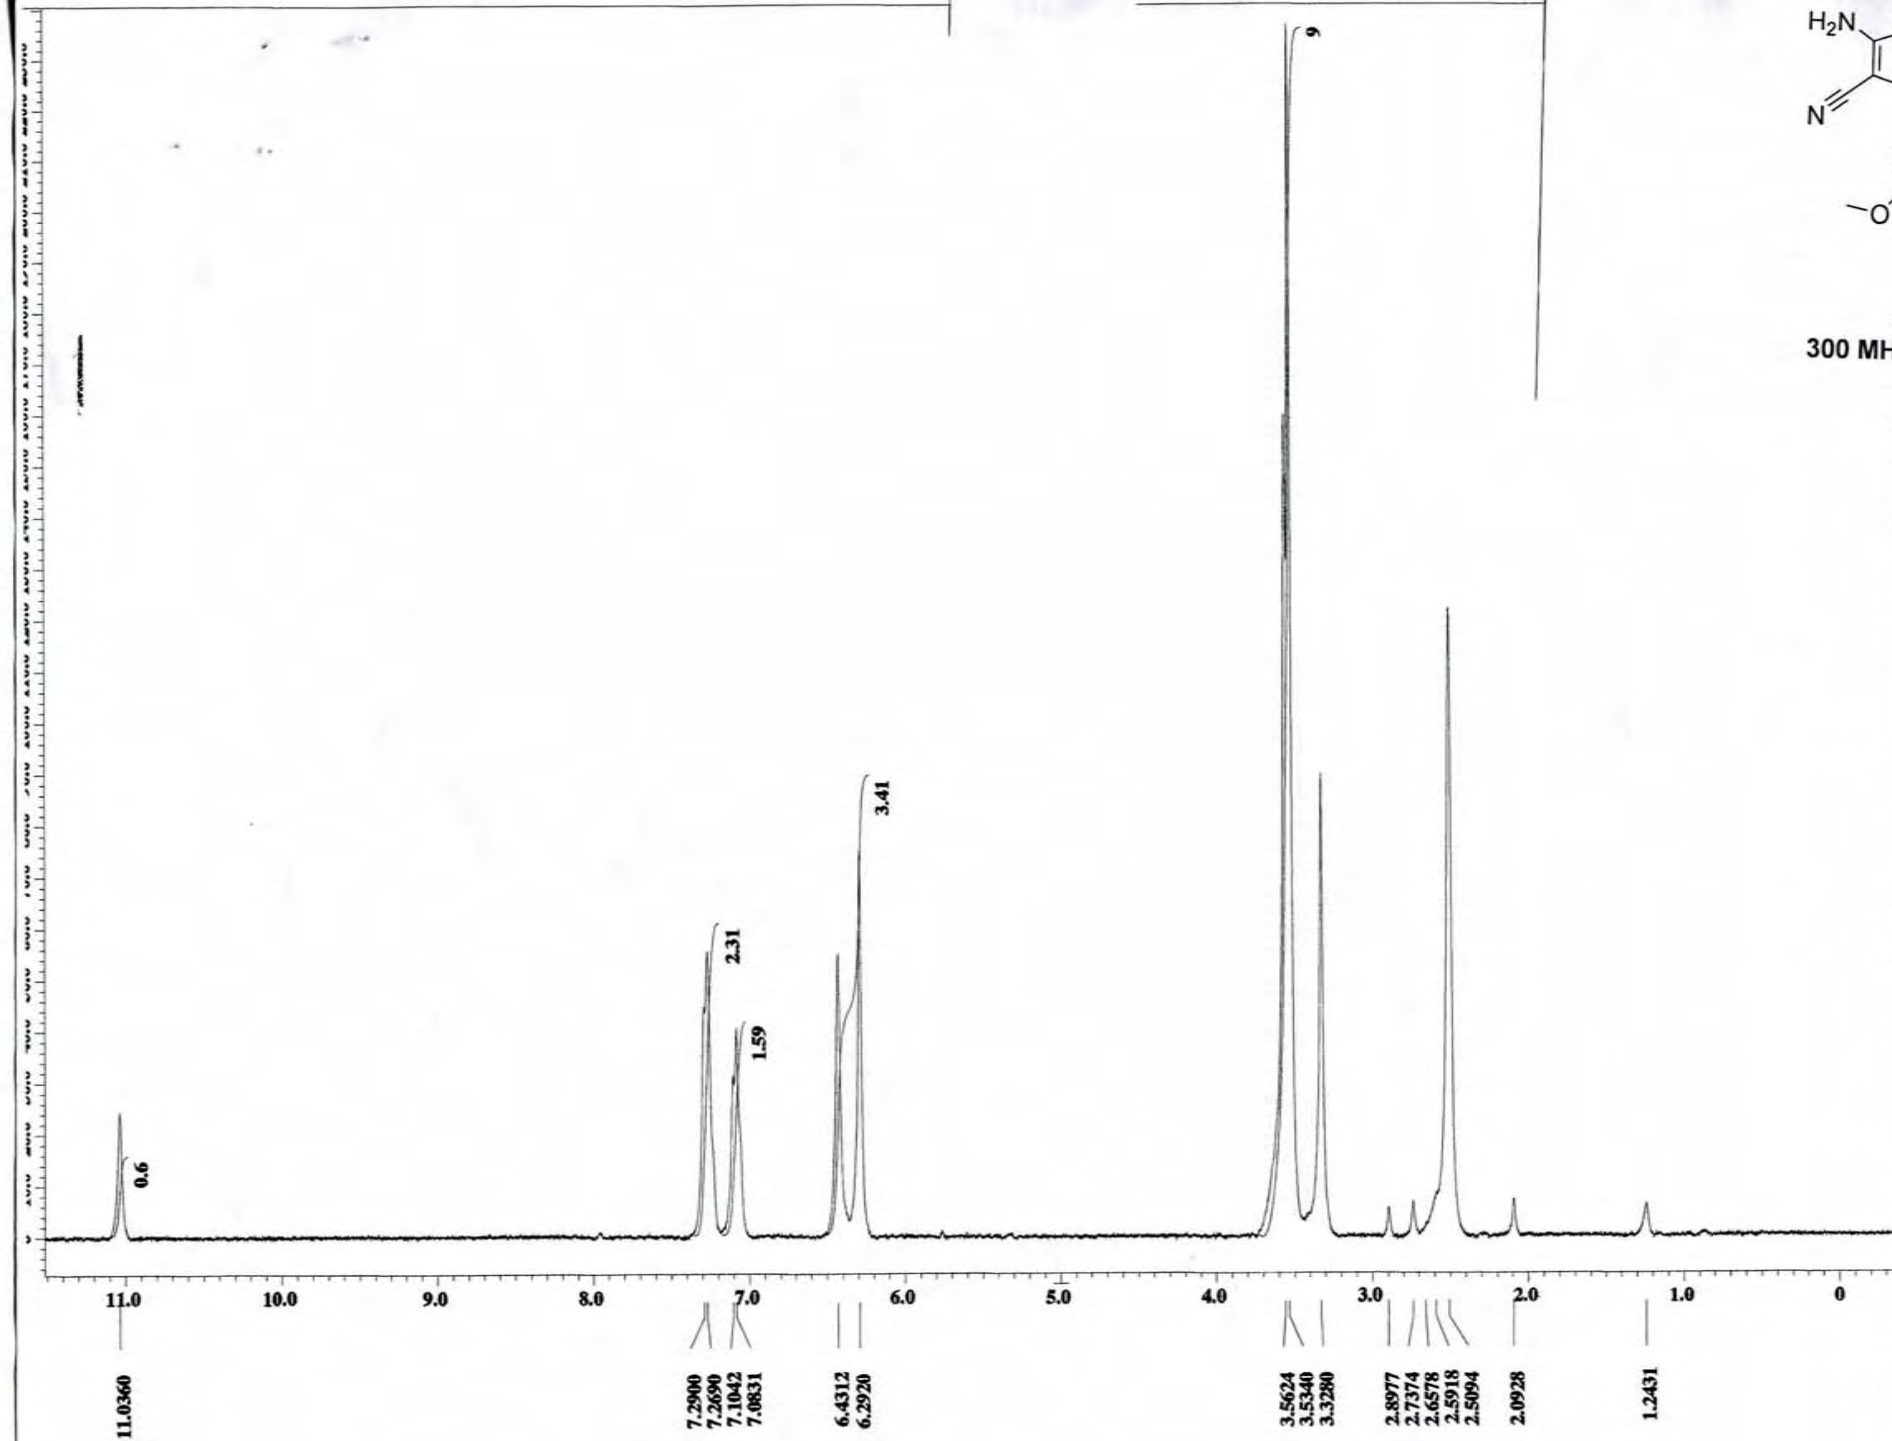

X : parts per Million : 1H

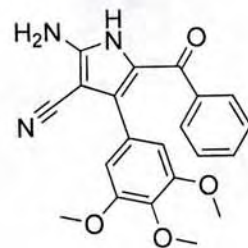

B<sub>5</sub>  
75 MHz, DMSO-d<sub>6</sub>

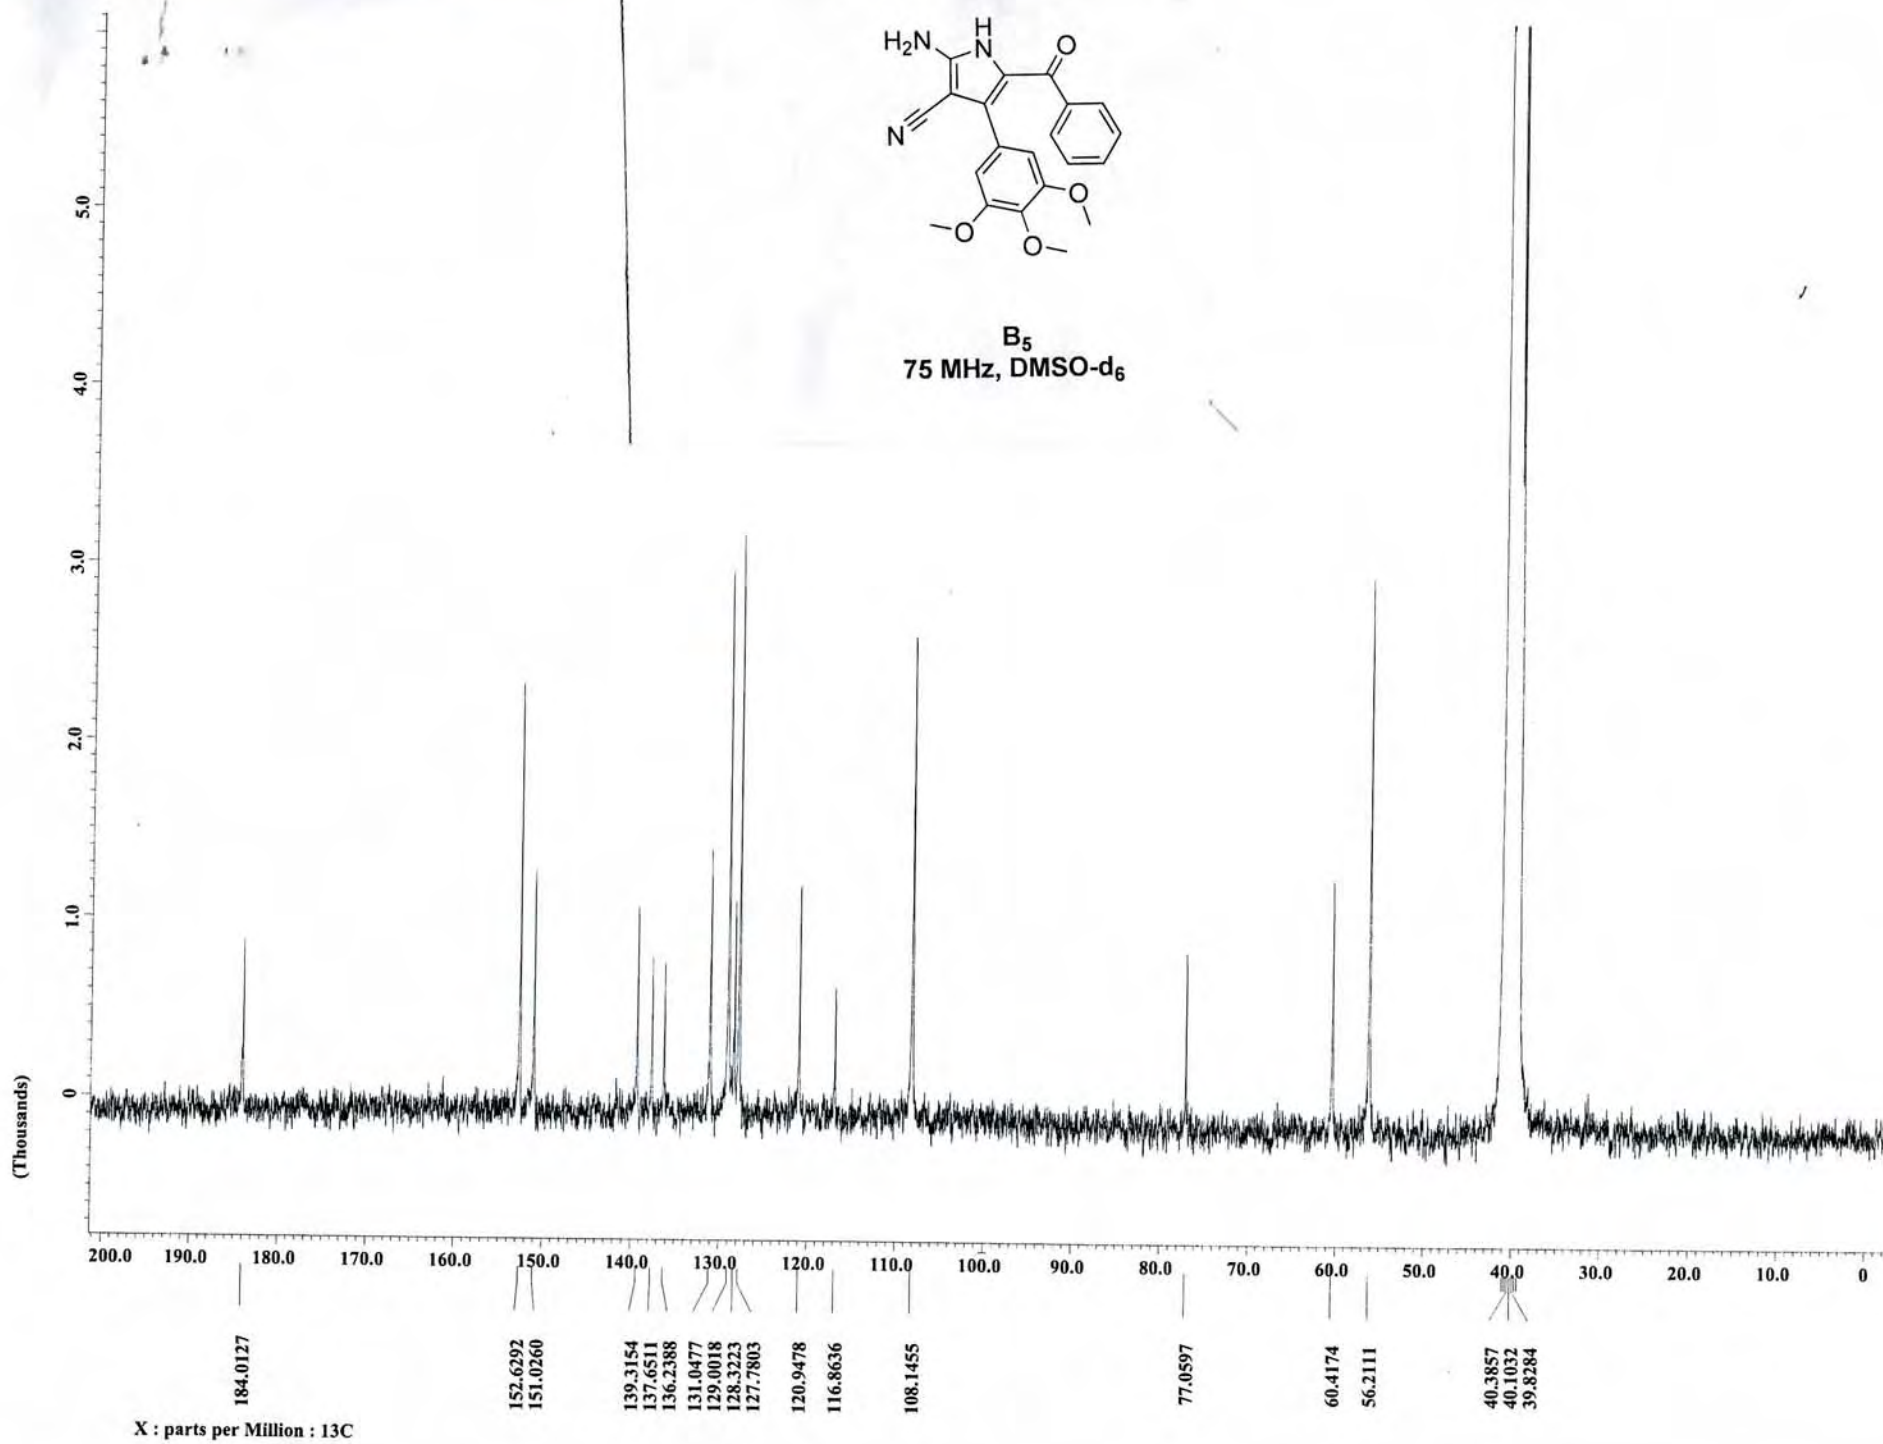



B6

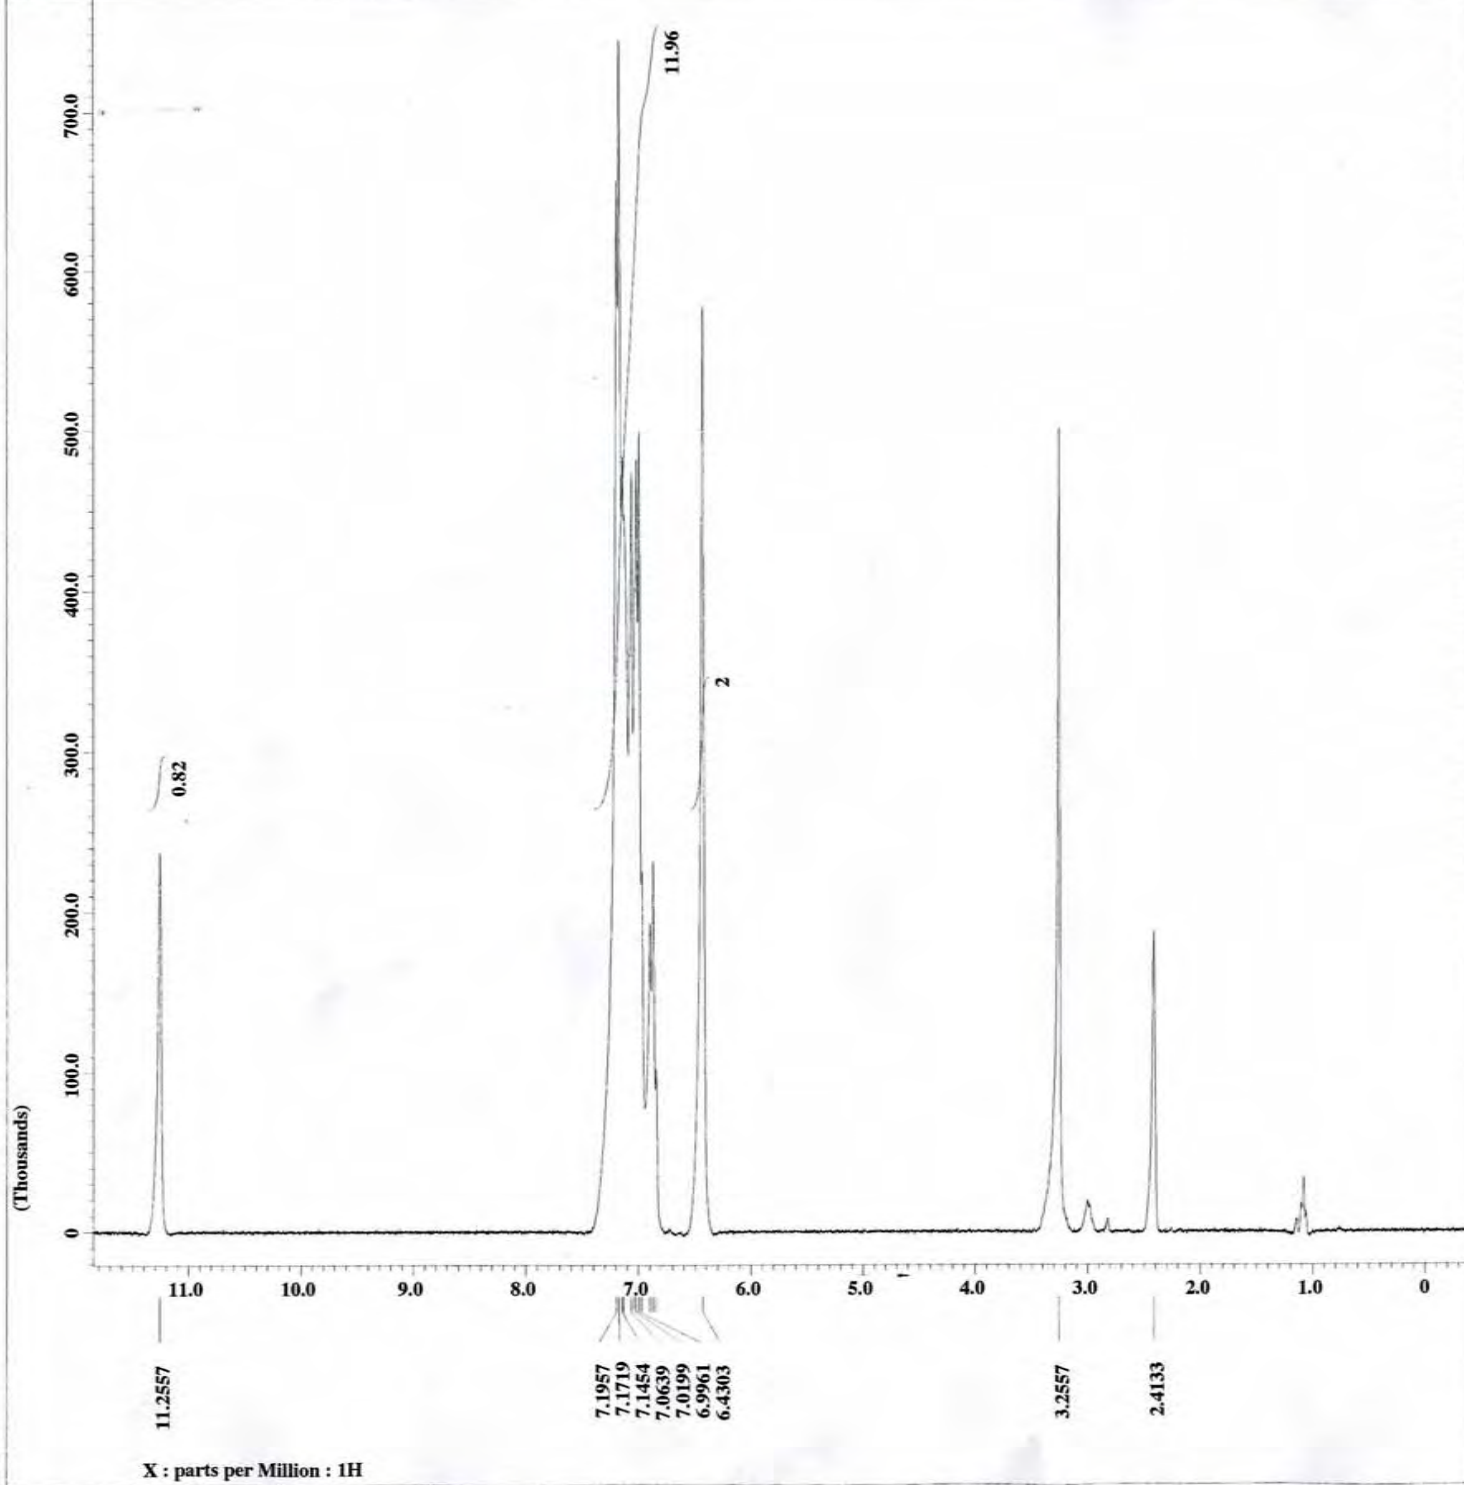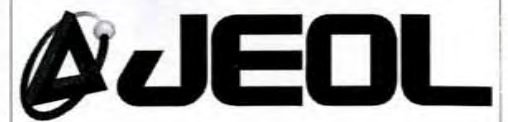

```

Filename      = 1d_spectrum-103.jdf
Author       = alex
Experiment   = single_pulse.exp
Sample_id    = S#549206
Solvent      = DMSO-D6
Creation_time = 8-DEC-2010 15:08:51
Revision_time = 8-DEC-2010 16:40:24
Current_time  = 8-DEC-2010 16:40:34

Comment      = Single Pulse Experime
Data_format  = 1D REAL
Dim_size     = 16384
Dim_title    = 1H
Dim_units    = [ppm]
Dimensions   = X
Site         = Eclipse+ 300
Spectrometer = DELTA_NMR

Field_strength = 7.0586013[T] (300[MHz]
X_acq_duration = 3.6339712[s]
X_domain       = 1H
X_freq         = 300.52965592[MHz]
X_offset       = 5[ppm]
X_points       = 16384
X_prescans     = 0
X_resolution   = 0.27518105[Hz]
X_sweep        = 4.50856628[kHz]
Clipped        = FALSE
Mod_return     = 1
Scans          = 8
Total_scans    = 8

X_90_width    = 16[us]
X_acq_time     = 3.6339712[s]
X_angle        = 45[deg]
X_pulse        = 8[us]
Initial_wait   = 1[s]
Phase_preset   = 3[us]
Recvr_gain     = 15
Relaxation_delay = 4[s]
Temp_get       = 23.5[dC]
Unblank_time   = 2[us]
  
```

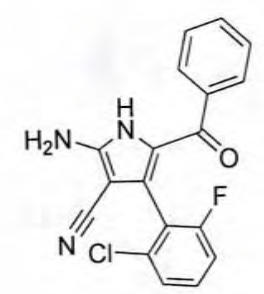

B<sub>6</sub>  
300 MHz, DMSO-d<sub>6</sub>

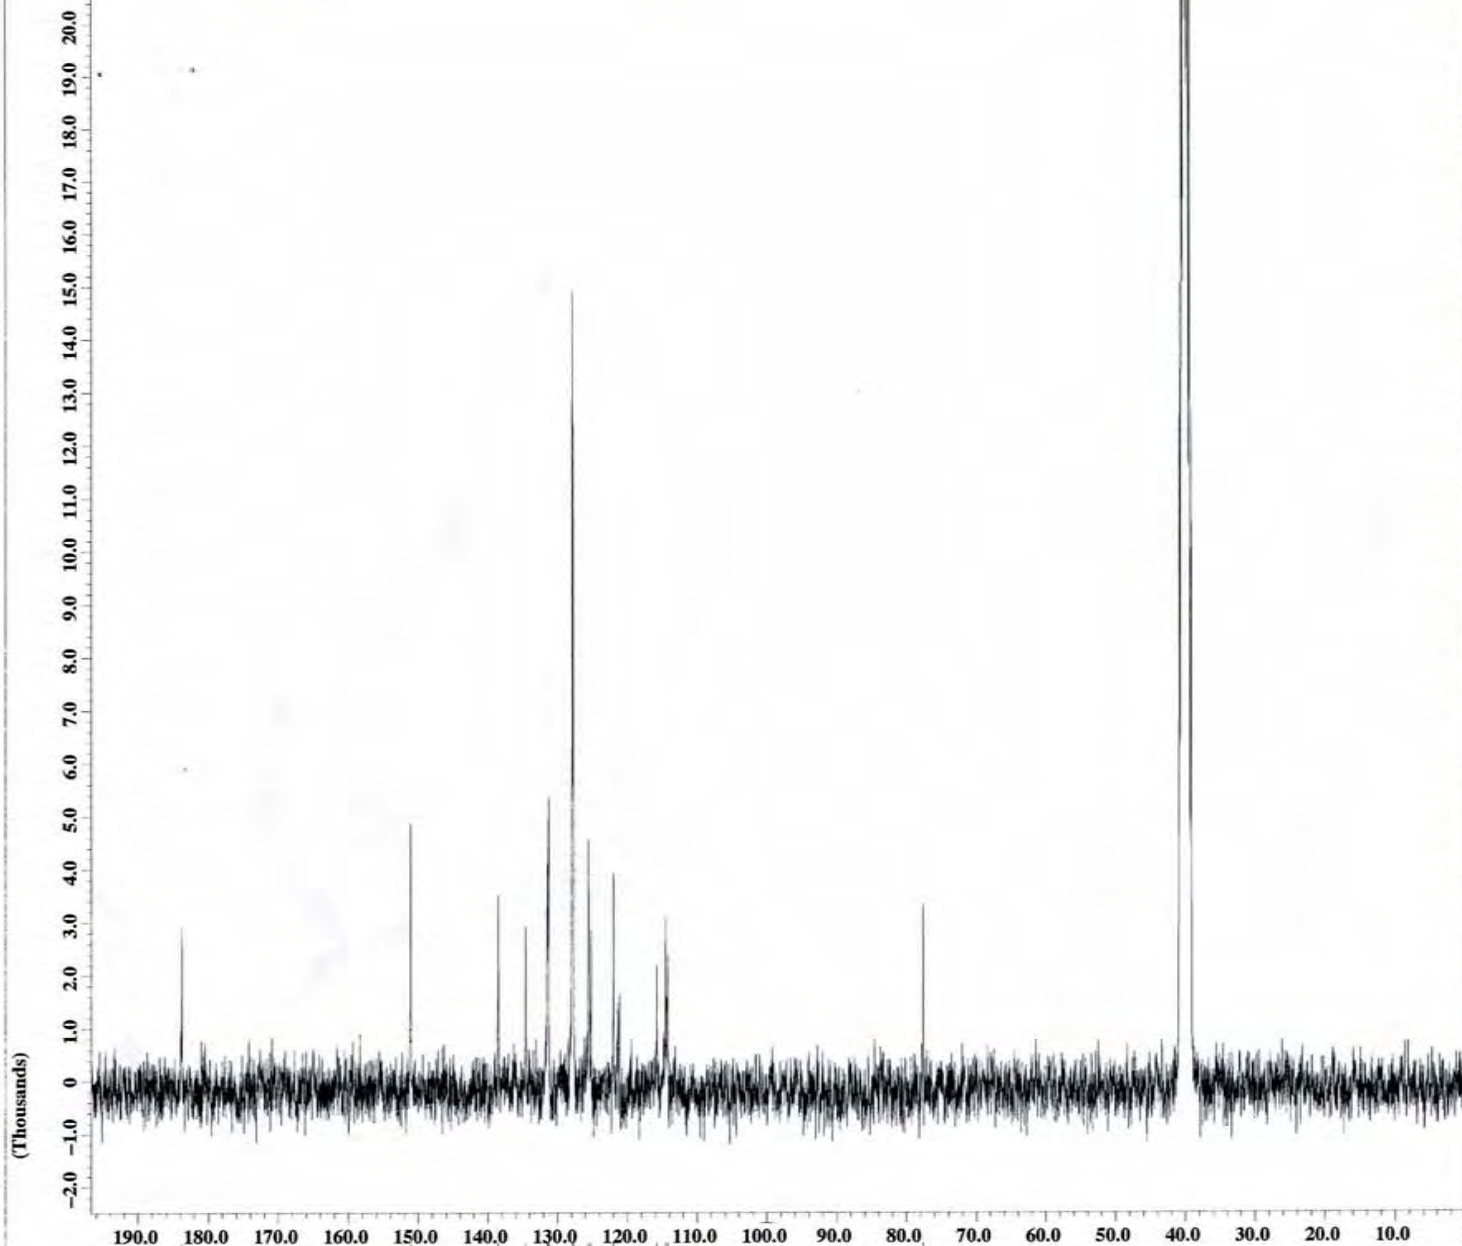

```

Filename      = ld_13c_spectrum-61.jd
Author       = alex
Experiment    = single_pulse_dec
Sample_id    = S#550704
Solvent      = DMSO-D6
Creation_time = 8-DEC-2010 16:05:11
Revision_time = 8-DEC-2010 16:33:05
Current_time  = 8-DEC-2010 16:34:11
  
```

```

Comment      = Single Pulse with Bro
Data_format  = 1D_COMPLEX
Dim_size     = 32768
Dim_title    = 13C
Dim_units    = [ppm]
Dimensions   = X
Site         = Eclipse+ 300
Spectrometer = DELTA_NMR
  
```

```

Field_strength = 7.0586013[T] (300[MHz]
X_acq_duration = 1.7334272[s]
X_domain       = 13C
X_freq         = 75.56823426[MHz]
X_offset       = 100[ppm]
X_points       = 32768
X_prescans    = 4
X_resolution   = 0.57689184[Hz]
X_sweep        = 18.90359168[kHz]
Irr_domain     = 1H
Irr_freq       = 300.52965592[MHz]
Irr_offset     = 5[ppm]
Clipped        = FALSE
Mod_return     = 1
Scans          = 1200
Total_scans    = 1200
  
```

```

X_90_width    = 8.1[us]
X_acq_time     = 1.7334272[s]
X_angle        = 30[deg]
X_pulse        = 2.7[us]
Initial_wait   = 1[s]
Phase_preset   = 3[us]
Recvr_gain     = 15
Relaxation_delay = 1[s]
Temp_get       = 24.3[dC]
Unblank_time   = 2[us]
  
```

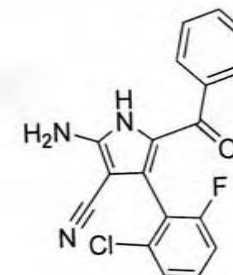

B<sub>6</sub>  
75 MHz, DMSO-d<sub>6</sub>

X : parts per Million : 13C

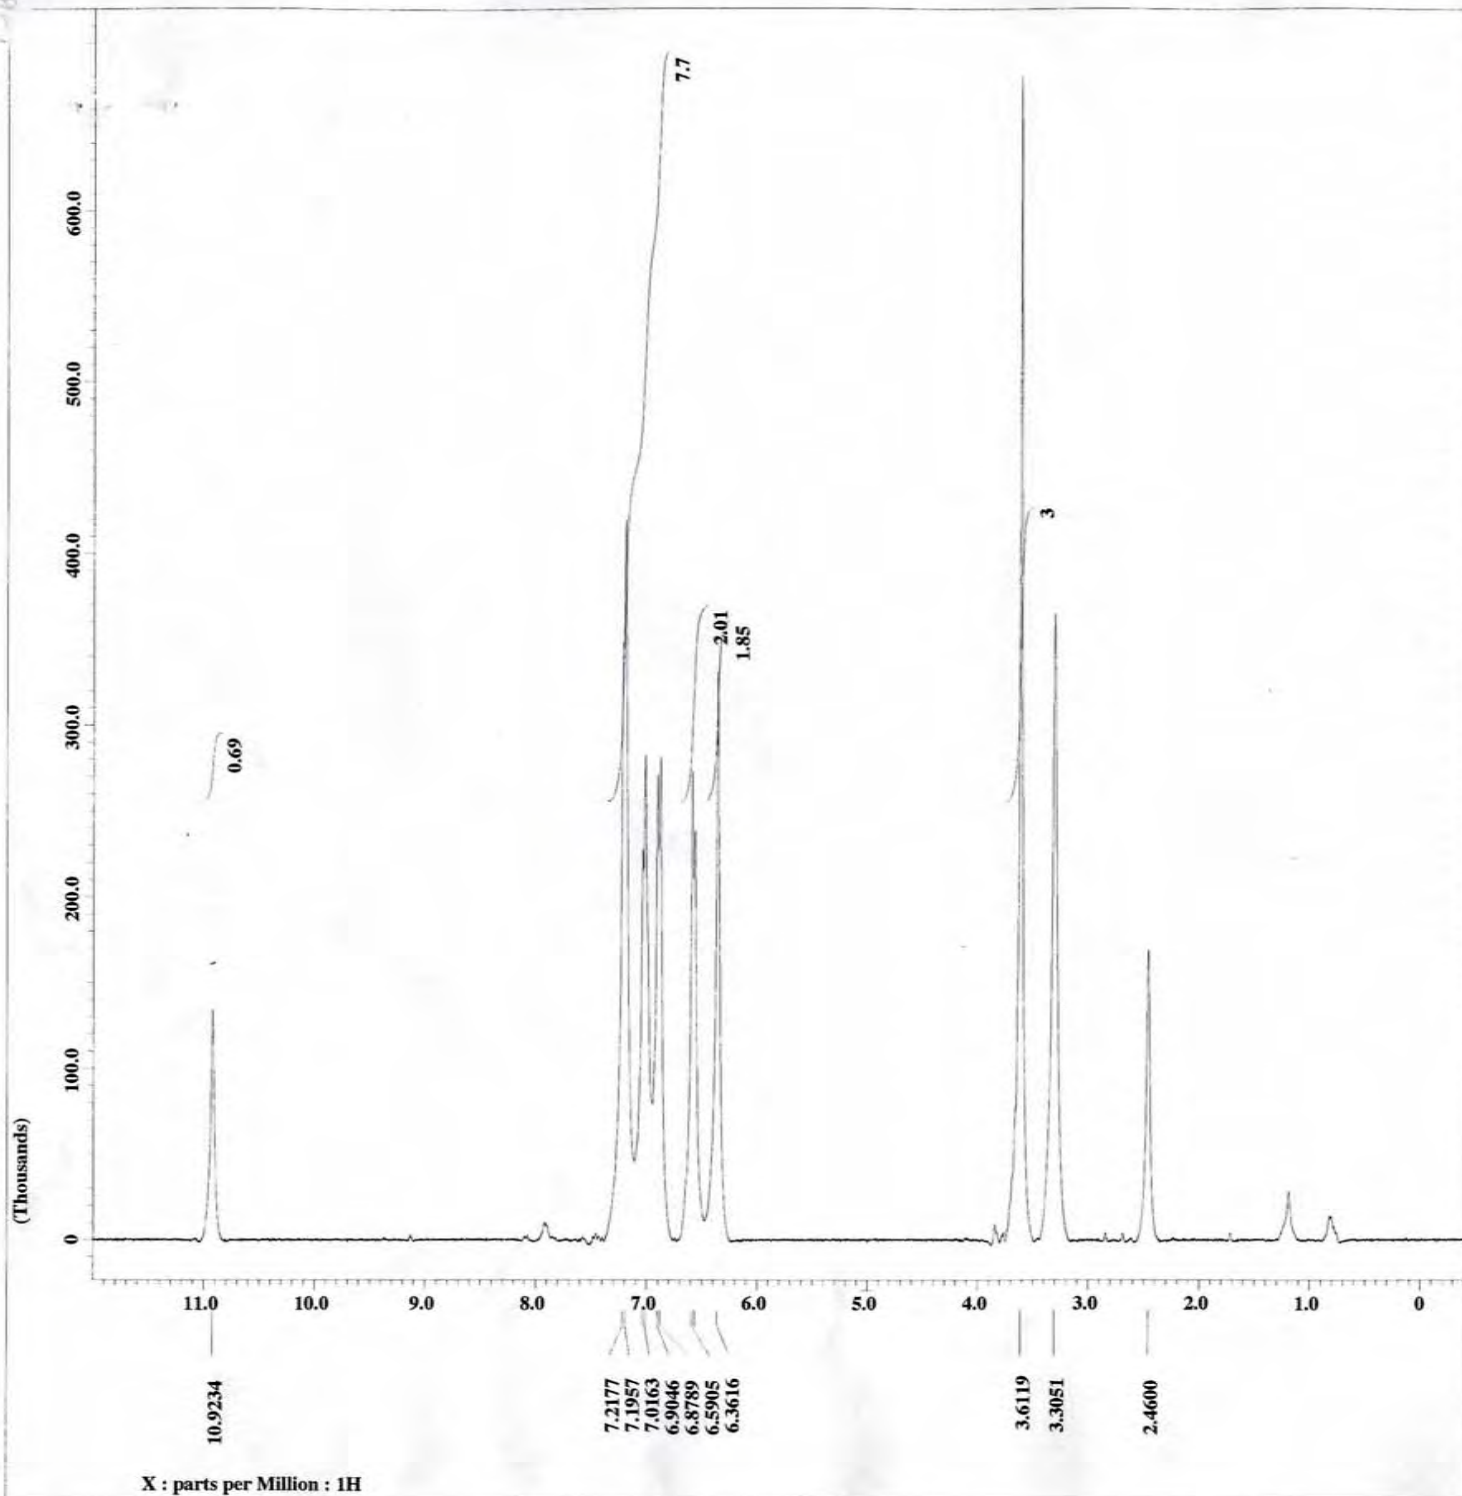

# JEOL

Filename = ld\_spectrum-213.jdf  
 Author = alex  
 Experiment = single\_pulse.exp  
 Sample\_id = S#624708  
 Solvent = DMSO-D6  
 Creation time = 21-DEC-2010 17:15:42  
 Revision time = 21-DEC-2010 17:31:15  
 Current\_time = 21-DEC-2010 17:31:39

Comment = Single Pulse Experime  
 Data\_format = 1D REAL  
 Dim\_size = 16384  
 Dim\_title = 1H  
 Dim\_units = [ppm]  
 Dimensions = X  
 Site = Eclipse+ 300  
 Spectrometer = DELTA\_NMR

Field\_strength = 7.0586013[T] (300[MHz]  
 X\_acq\_duration = 3.6339712[s]  
 X\_domain = 1H  
 X\_freq = 300.52965592[MHz]  
 X\_offset = 5[ppm]  
 X\_points = 16384  
 X\_prescans = 0  
 X\_resolution = 0.27518105[Hz]  
 X\_sweep = 4.50856628[kHz]  
 Clipped = FALSE  
 Mod\_return = 1  
 Scans = 16  
 Total\_scans = 16

X\_90\_width = 16[us]  
 X\_acq\_time = 3.6339712[s]  
 X\_angle = 45[deg]  
 X\_pulse = 8[us]  
 Initial\_wait = 1[s]  
 Phase\_preset = 3[us]  
 Recvr\_gain = 15  
 Relaxation\_delay = 4[s]  
 Temp\_get = 23.8[dC]  
 Unblank\_time = 2[us]

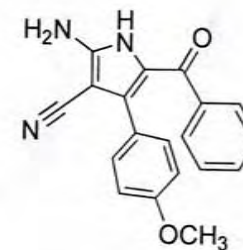

B<sub>7</sub>  
 300 MHz, DMSO-d<sub>6</sub>



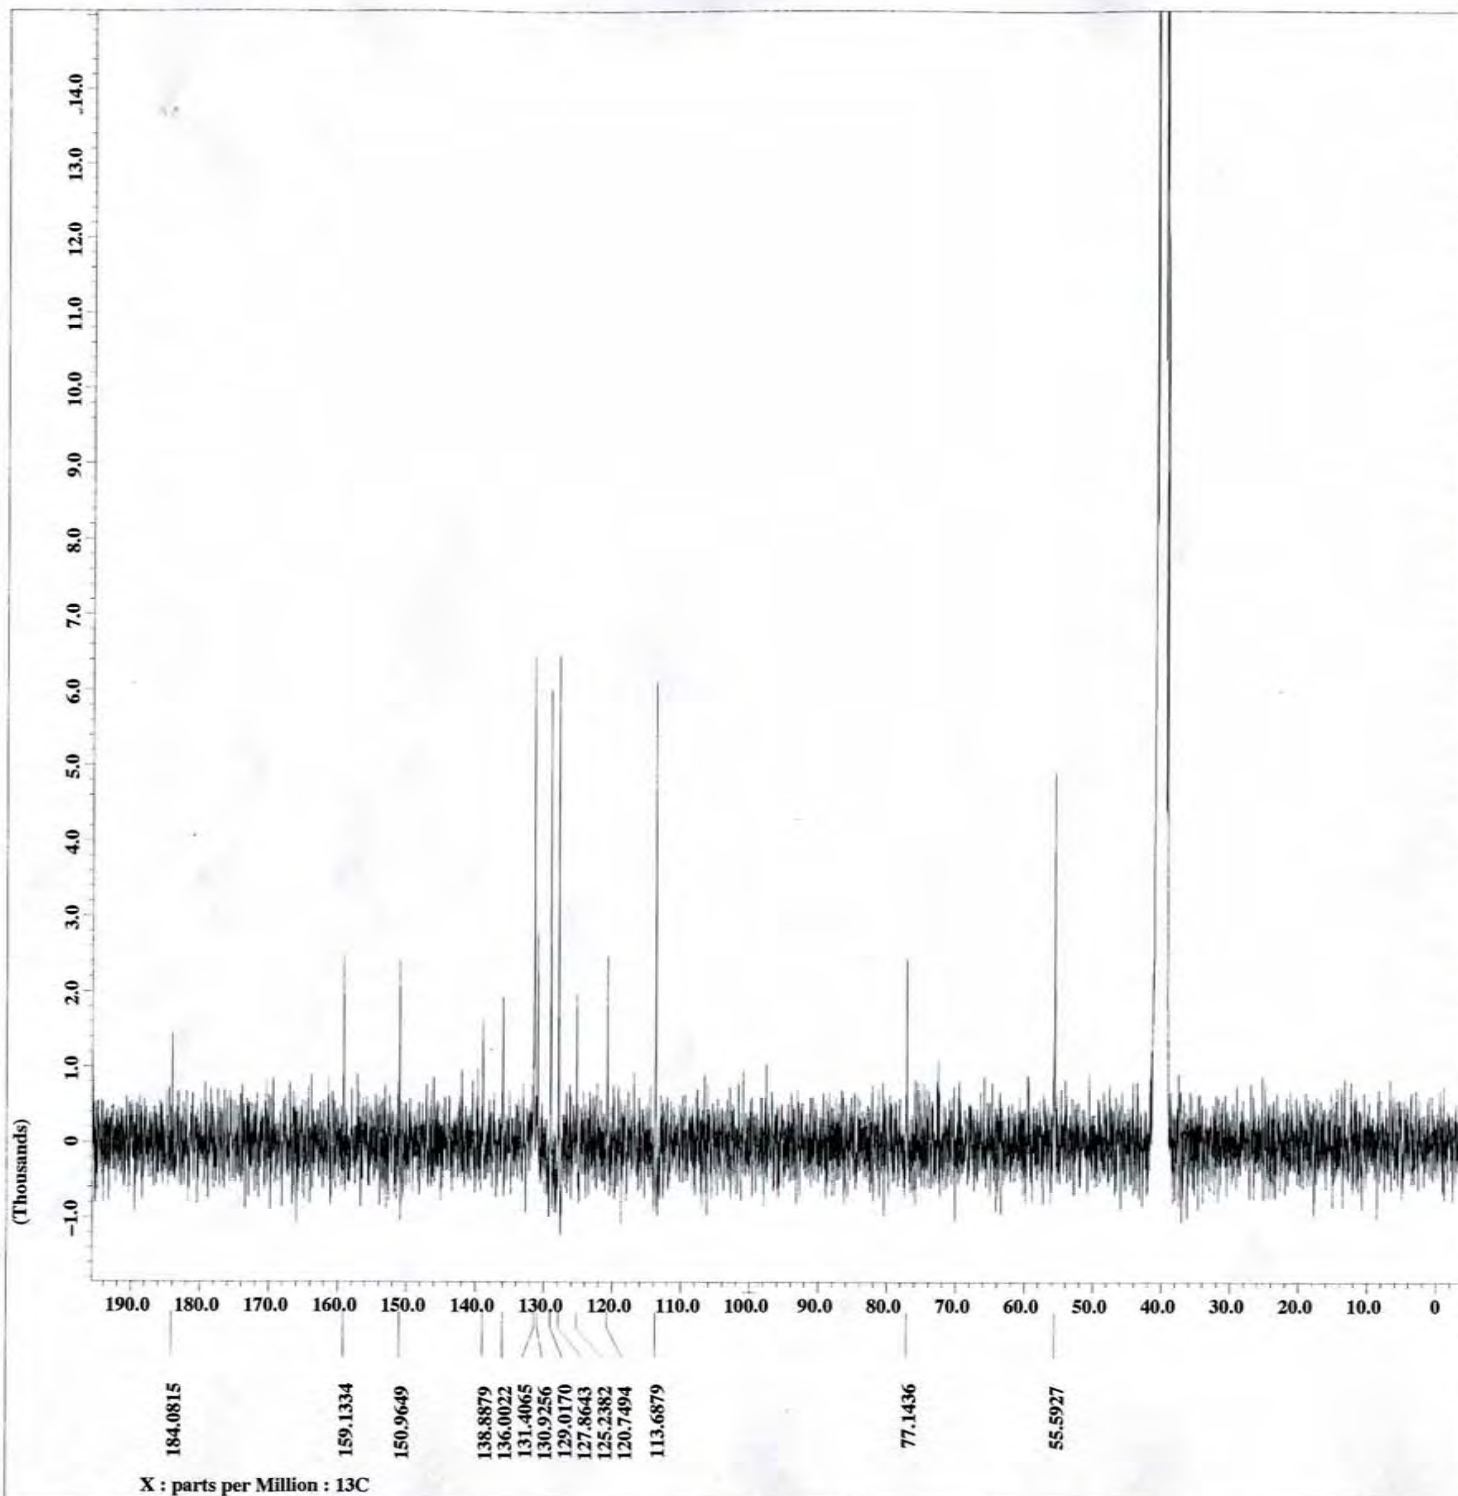

```

Filename      = 1d_13c_spectrum-116.j
Author       = alex
Experiment   = single_pulse_dec
Sample_id    = S#626490
Solvent      = DMSO-D6
Creation_time = 21-DEC-2010 18:02:25
Revision_time = 21-DEC-2010 18:15:45
Current_time  = 21-DEC-2010 18:16:22
  
```

```

Comment      = Single Pulse with Bro
Data_format  = 1D REAL
Dim_size     = 32768
Dim_title    = 13C
Dim_units    = [ppm]
Dimensions   = X
Site         = Eclipse+ 300
Spectrometer = DELTA_NMR
  
```

```

Field_strength = 7.0586013[T] (300[MHz]
X_acq_duration = 1.7334272[s]
X_domain       = 13C
X_freq         = 75.56823426[MHz]
X_offset       = 100[ppm]
X_points       = 32768
X_prescans     = 4
X_resolution   = 0.57689184[Hz]
X_sweep        = 18.90359168[kHz]
Irr_domain     = 1H
Irr_freq       = 300.52965592[MHz]
Irr_offset     = 5[ppm]
Clipped        = FALSE
Mod_return     = 1
Scans          = 1000
Total_scans    = 1000
  
```

```

X_90_width    = 8.1[us]
X_acq_time     = 1.7334272[s]
X_angle        = 30[deg]
X_pulse        = 2.7[us]
Initial_wait   = 1[s]
Phase_preset   = 3[us]
Recvr_gain     = 15
Relaxation_delay = 1[s]
Temp_get       = 25.1[dC]
Unblank_time   = 2[us]
  
```

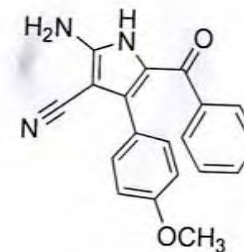

B<sub>7</sub>  
75 MHz, DMSO-d<sub>6</sub>

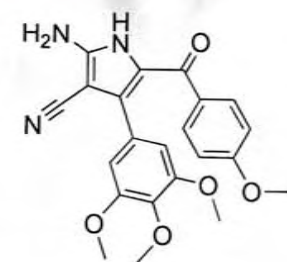

**B<sub>8</sub>**  
300 MHz, acetone-d<sub>6</sub>

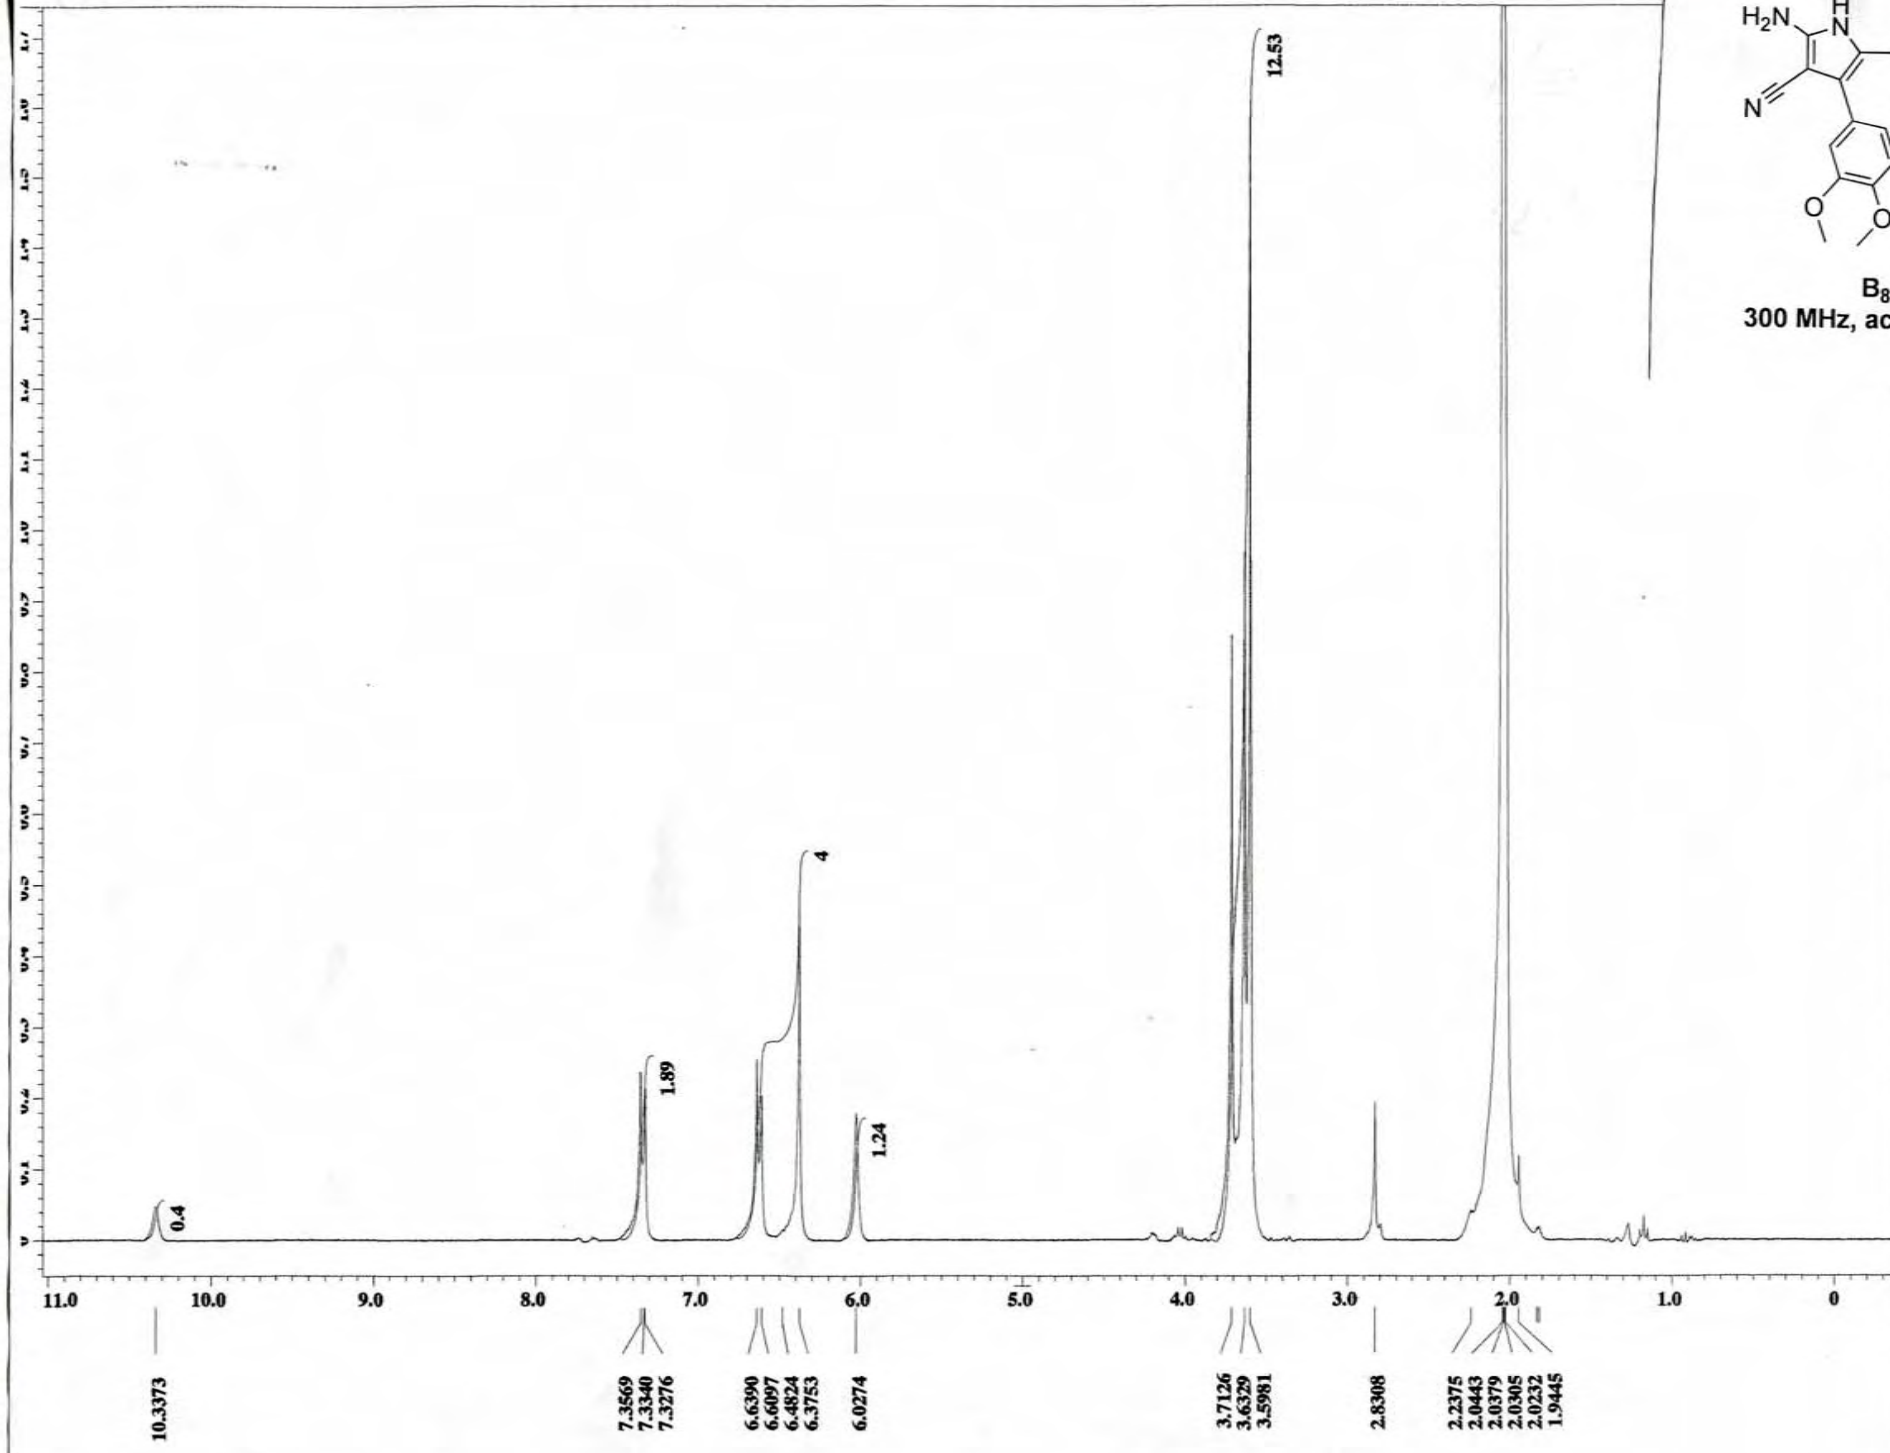

X : parts per Million : 1H

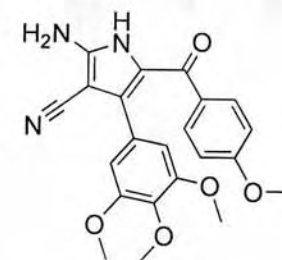

**B<sub>8</sub>**  
75 MHz, acetone-d<sub>6</sub>

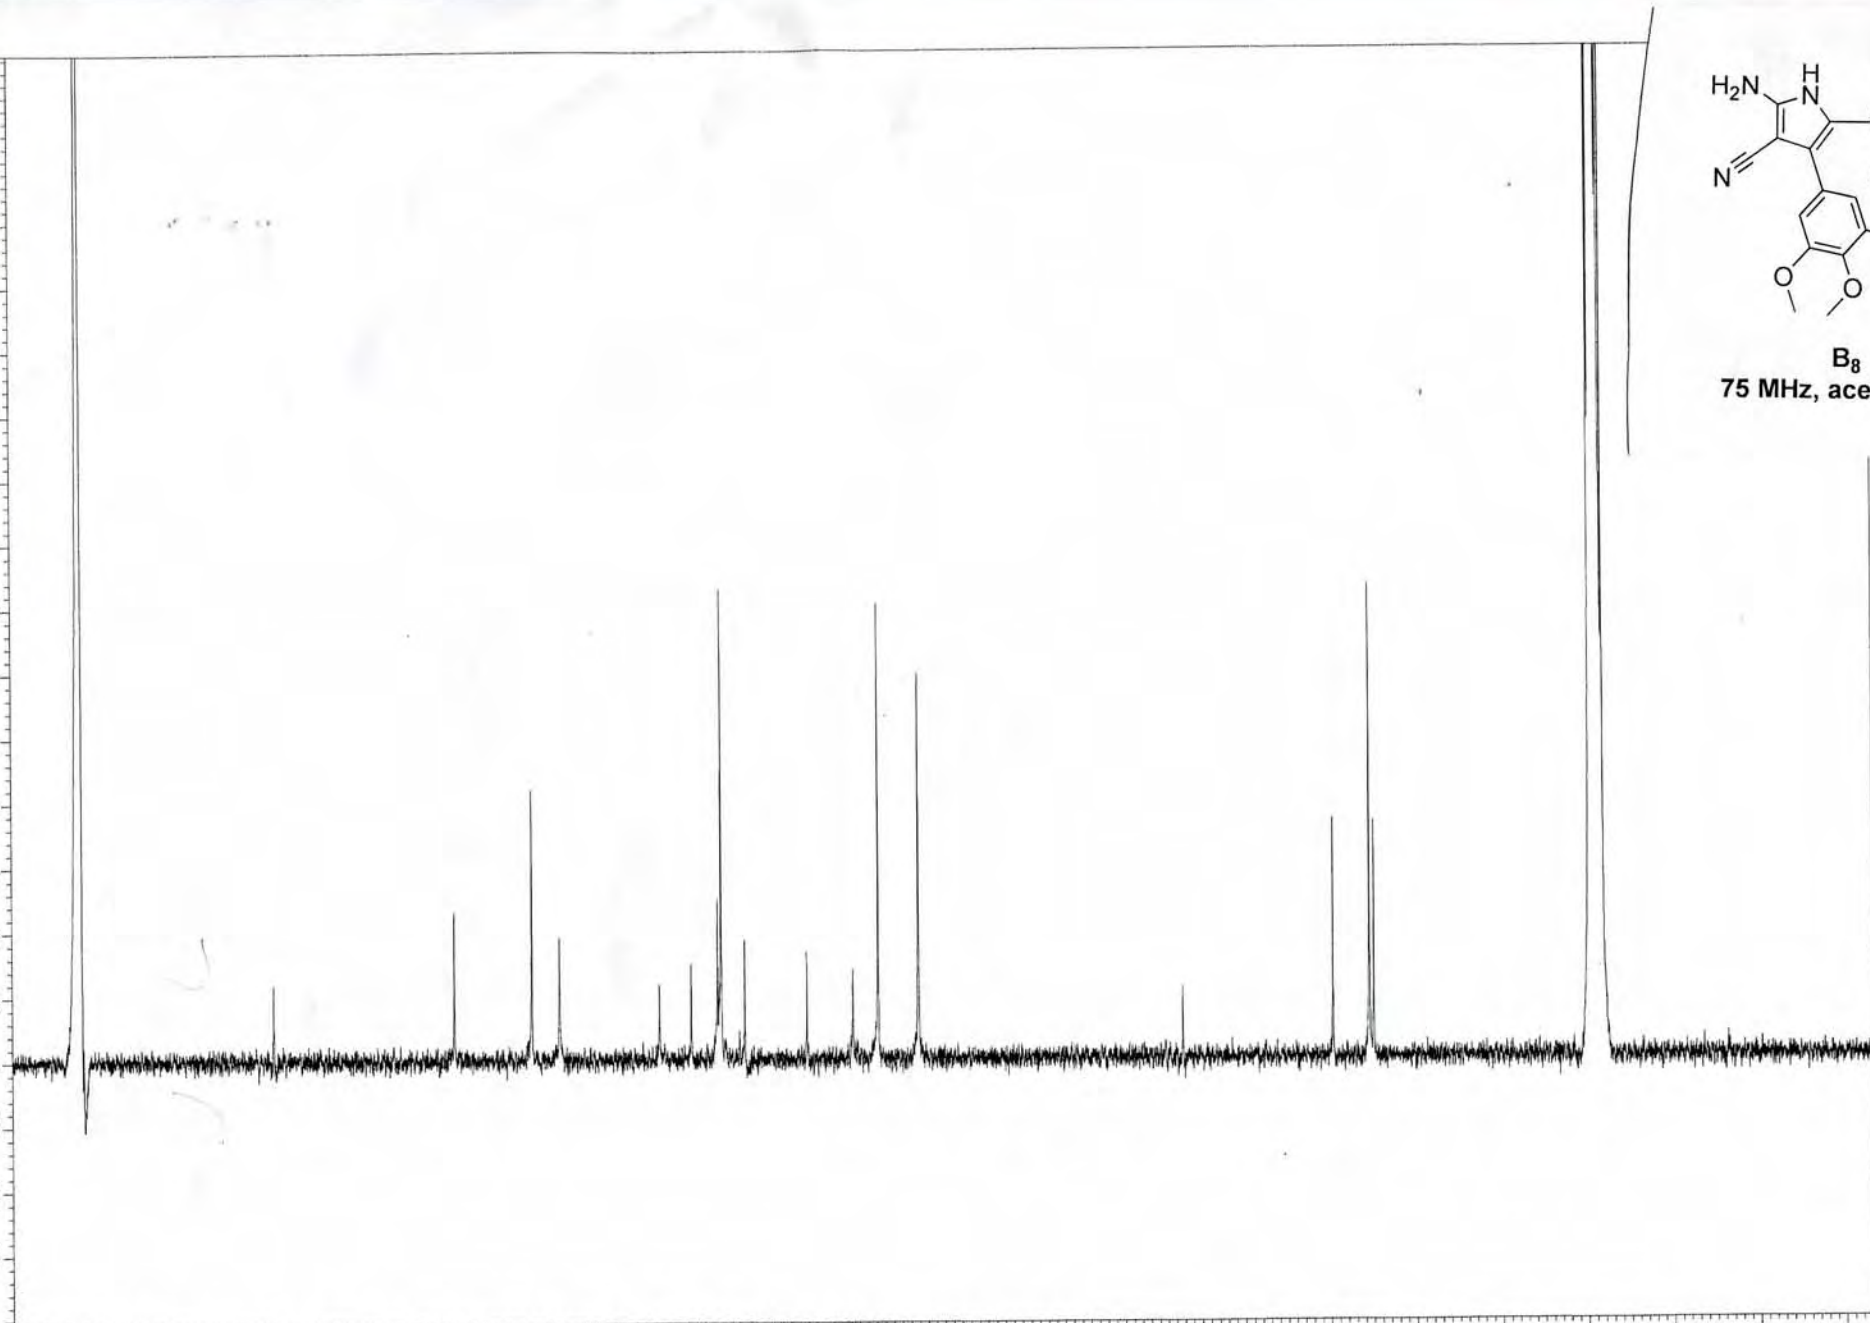

205.4034  
205.0293

183.0814

162.0343

152.9880

149.7740

138.1626

134.4601

131.3836

130.9637

128.2384

121.0089

115.6727

112.6649

107.9929

77.2047

59.7227

55.4629

54.9438

29.2934

29.0415

28.7819

X : parts per Million : 13C



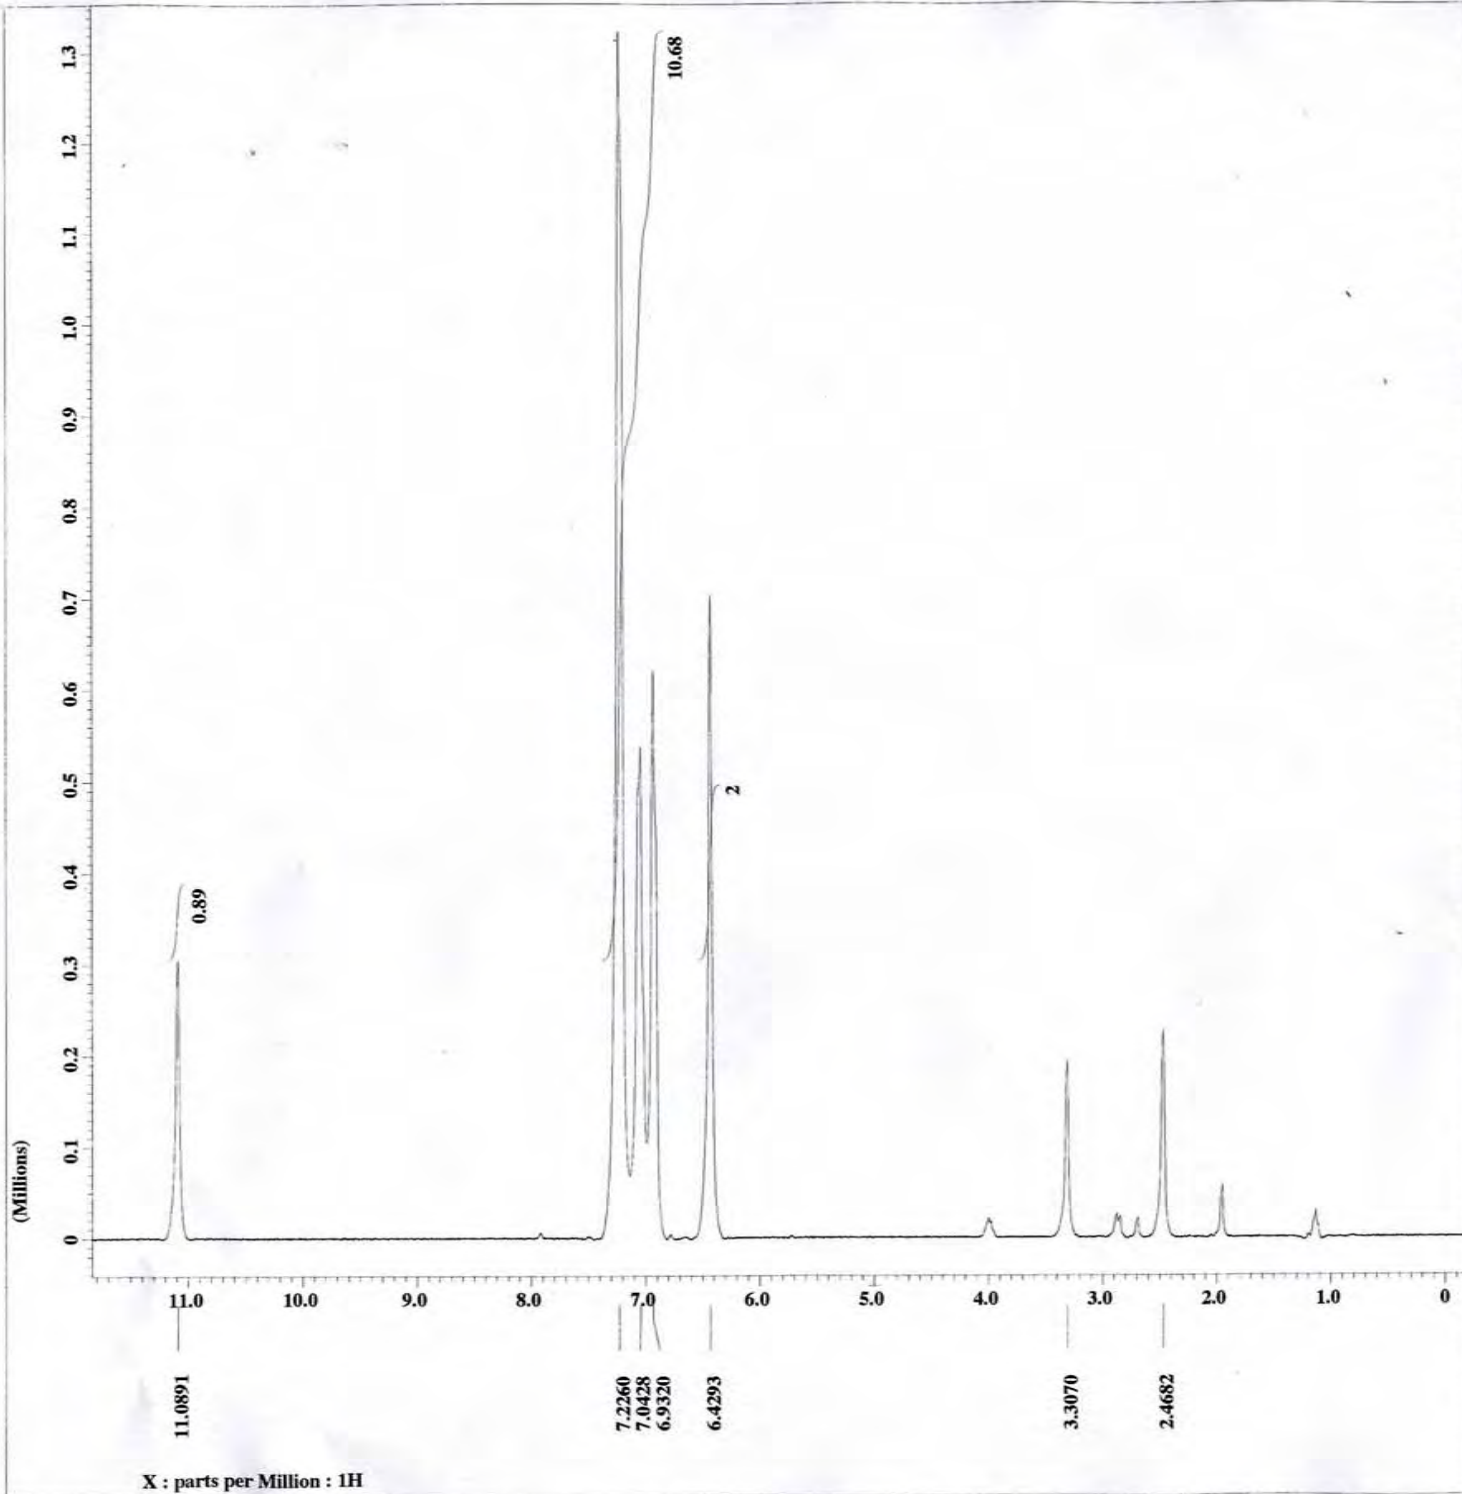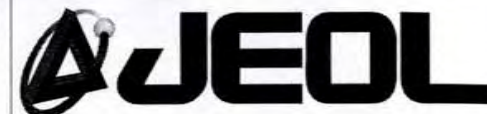

```

Filename      = ld_spectrum-85.jdf
Author       = alex
Experiment   = single_pulse.exp
Sample_id    = S#433379
Solvent      = DMSO-D6
Creation_time = 7-DEC-2010 11:55:50
Revision_time = 7-DEC-2010 12:18:24
Current_time  = 7-DEC-2010 12:18:58

Comment      = Single Pulse Experime
Data_format  = 1D REAL
Dim_size     = 16384
Dim_title    = 1H
Dim_units    = [ppm]
Dimensions   = X
Site         = Eclipse+ 300
Spectrometer = DELTA_NMR

Field_strength = 7.0586013[T] (300[MHz]
X_acq_duration = 3.6339712[s]
X_domain       = 1H
X_freq         = 300.52965592[MHz]
X_offset       = 5[ppm]
X_points       = 16384
X_prescans    = 0
X_resolution   = 0.27518105[Hz]
X_sweep        = 4.50856628[kHz]
Clipped        = FALSE
Mod_return     = 1
Scans          = 8
Total_scans    = 8

X_90_width    = 16[us]
X_acq_time    = 3.6339712[s]
X_angle       = 45[deg]
X_pulse       = 8[us]
Initial_wait  = 1[s]
Phase_preset  = 3[us]
Recvr_gain    = 15
Relaxation_delay = 4[s]
Temp_get      = 23.7[dC]
Unblank_time  = 2[us]

```

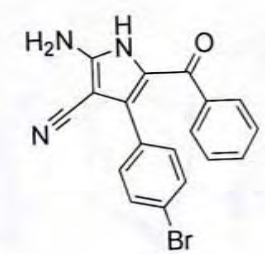

B<sub>9</sub>  
300 MHz, DMSO-d<sub>6</sub>

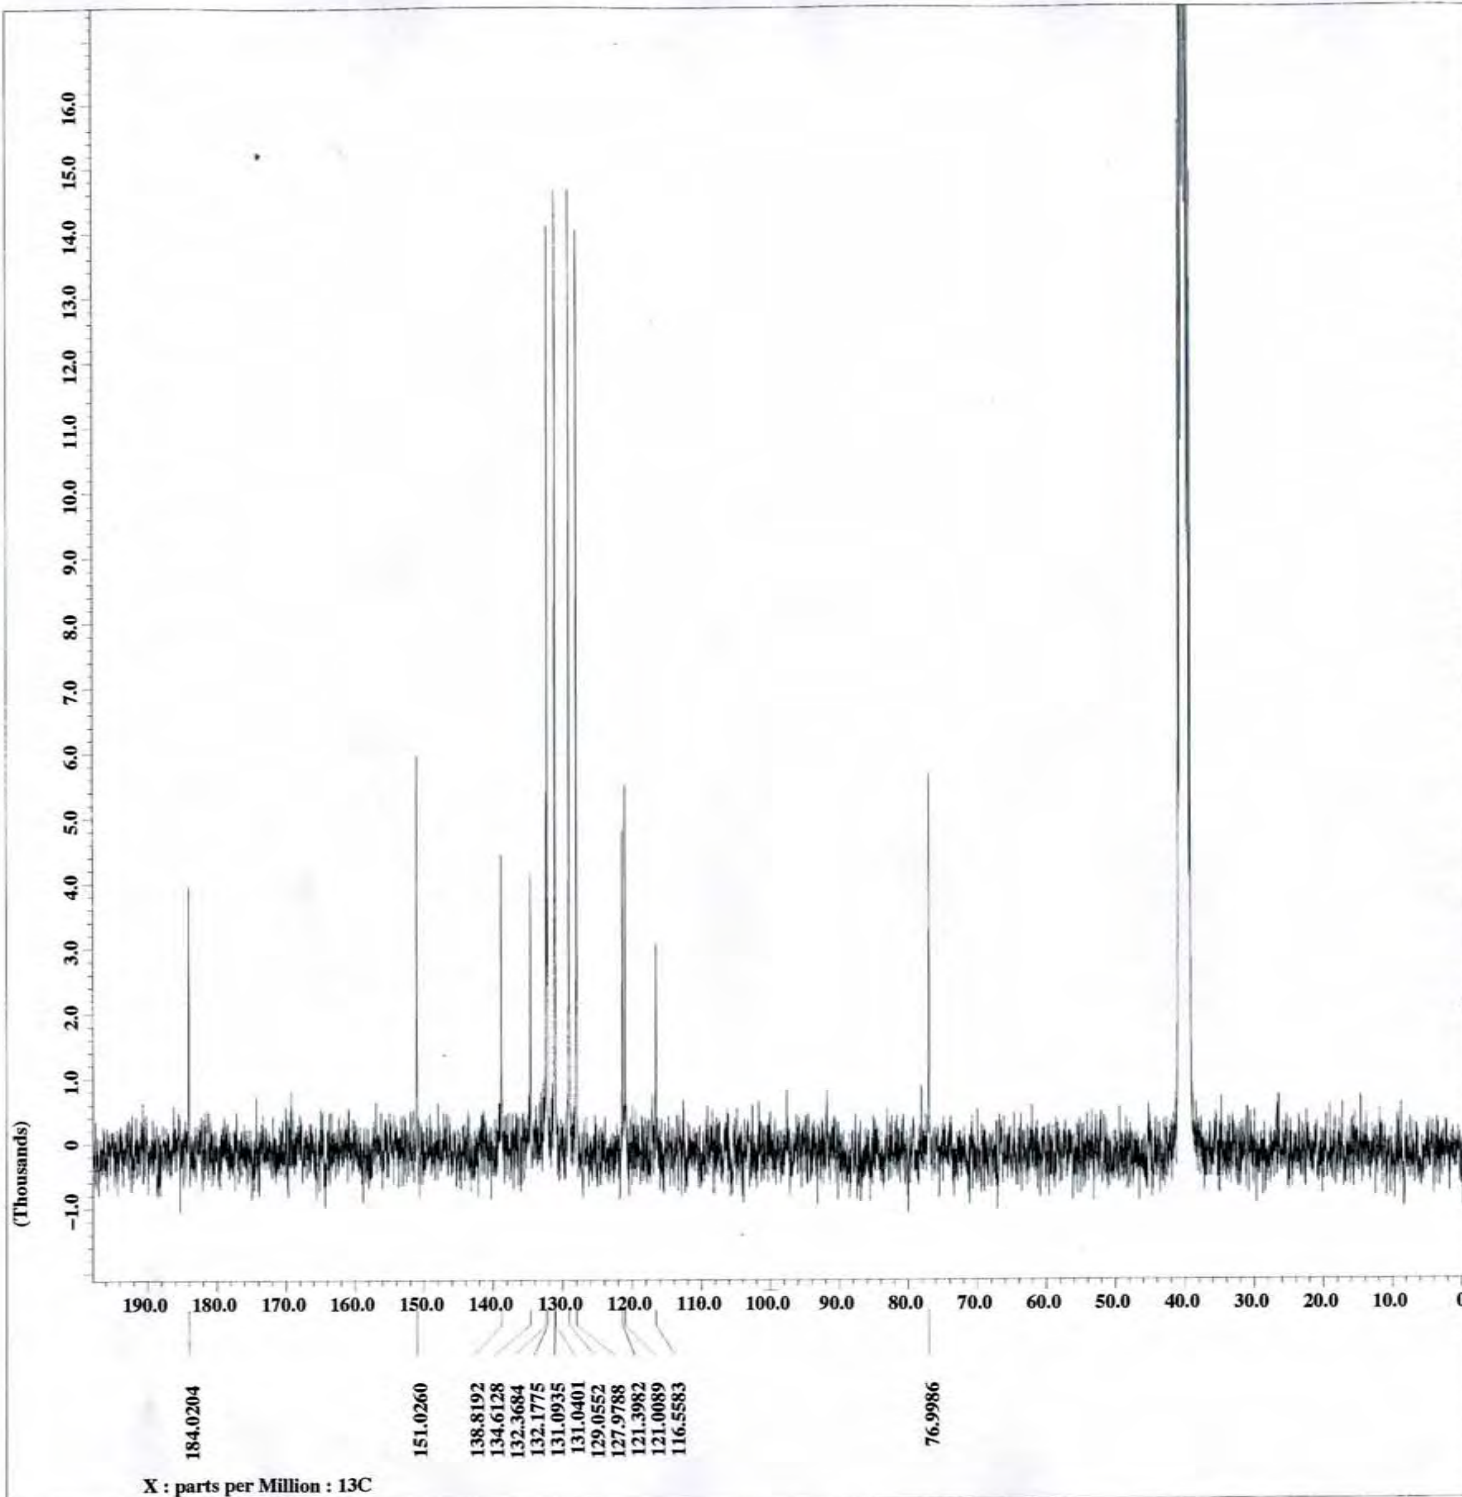

Filename = 1d\_13c\_spectrum-53.jd  
 Author = alex  
 Experiment = single\_pulse\_dec  
 Sample\_id = S#434576  
 Solvent = DMSO-D6  
 Creation\_time = 7-DEC-2010 13:09:54  
 Revision\_time = 7-DEC-2010 16:41:26  
 Current\_time = 7-DEC-2010 16:41:37

Comment = Single Pulse with Bro  
 Data\_format = 1D\_COMPLEX  
 Dim\_size = 32768  
 Dim\_title = 13C  
 Dim\_units = [ppm]  
 Dimensions = X  
 Site = Eclipse+ 300  
 Spectrometer = DELTA\_NMR

Field\_strength = 7.0586013[T] (300[MHz])  
 X\_acq\_duration = 1.7334272[s]  
 X\_domain = 13C  
 X\_freq = 75.56823426[MHz]  
 X\_offset = 100[ppm]  
 X\_points = 32768  
 X\_prescans = 4  
 X\_resolution = 0.57689184[Hz]  
 X\_sweep = 18.90359168[kHz]  
 Irr\_domain = 1H  
 Irr\_freq = 300.52965592[MHz]  
 Irr\_offset = 5[ppm]  
 Clipped = FALSE  
 Mod\_return = 1  
 Scans = 1600  
 Total\_scans = 1600

X\_90\_width = 8.1[us]  
 X\_acq\_time = 1.7334272[s]  
 X\_angle = 30[deg]  
 X\_pulse = 2.7[us]  
 Initial\_wait = 1[s]  
 Phase\_preset = 3[us]  
 Recvr\_gain = 15  
 Relaxation\_delay = 1[s]  
 Temp\_get = 24.9[dC]  
 Unblank\_time = 2[us]

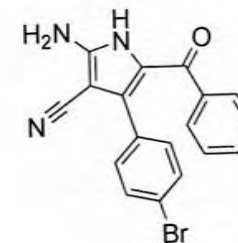

B<sub>9</sub>  
 75 MHz, DMSO-d<sub>6</sub>

4000.00  
1000.00  
0

11.0  
10.0  
9.0  
8.0  
7.0  
6.0  
5.0  
4.0  
3.0  
2.0  
1.0  
0

10.9444  
0.61

7.1509  
7.1225  
7.0529  
7.0245  
6.5676  
6.5163  
6.4925  
6.4879  
6.4614  
6.2361  
4  
2.03

6.37  
3.28  
3.6302  
3.6027  
3.5148  
3.4132  
3.3537

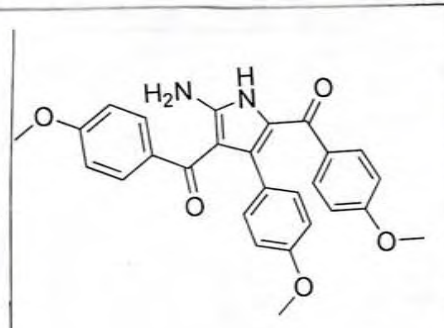

B<sub>10</sub>  
300 MHz, DMSO-d<sub>6</sub>

2.5103

X : parts per Million : 1H



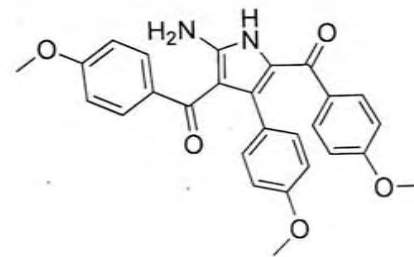

B<sub>10</sub>  
75 MHz, DMSO-d<sub>6</sub>

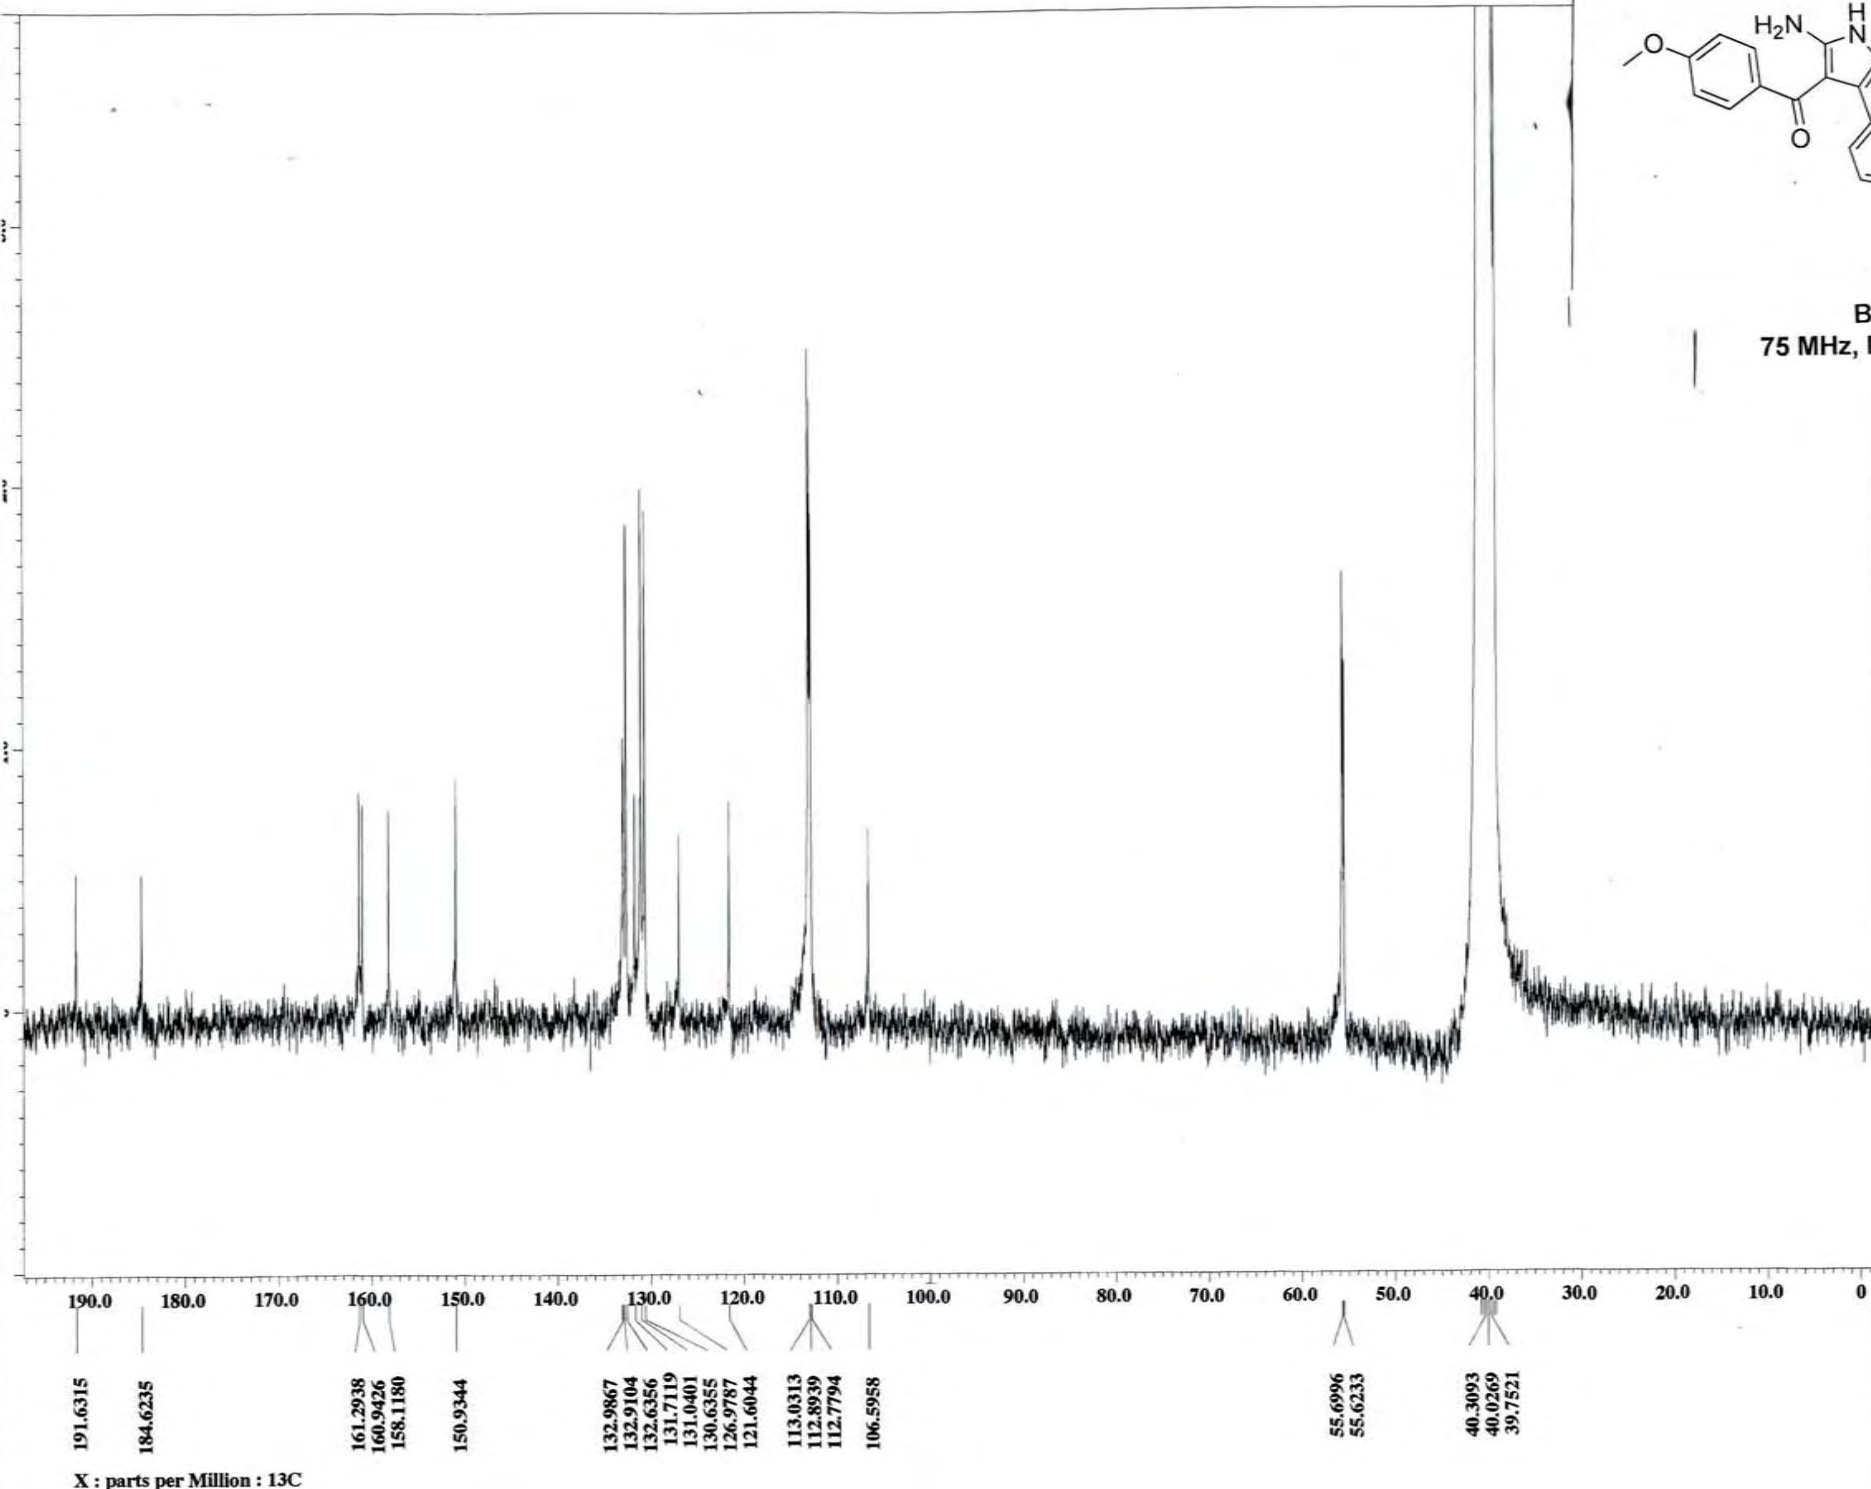

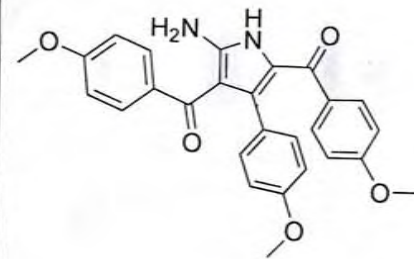

B<sub>10</sub>  
75 MHz, DMSO-d<sub>6</sub>

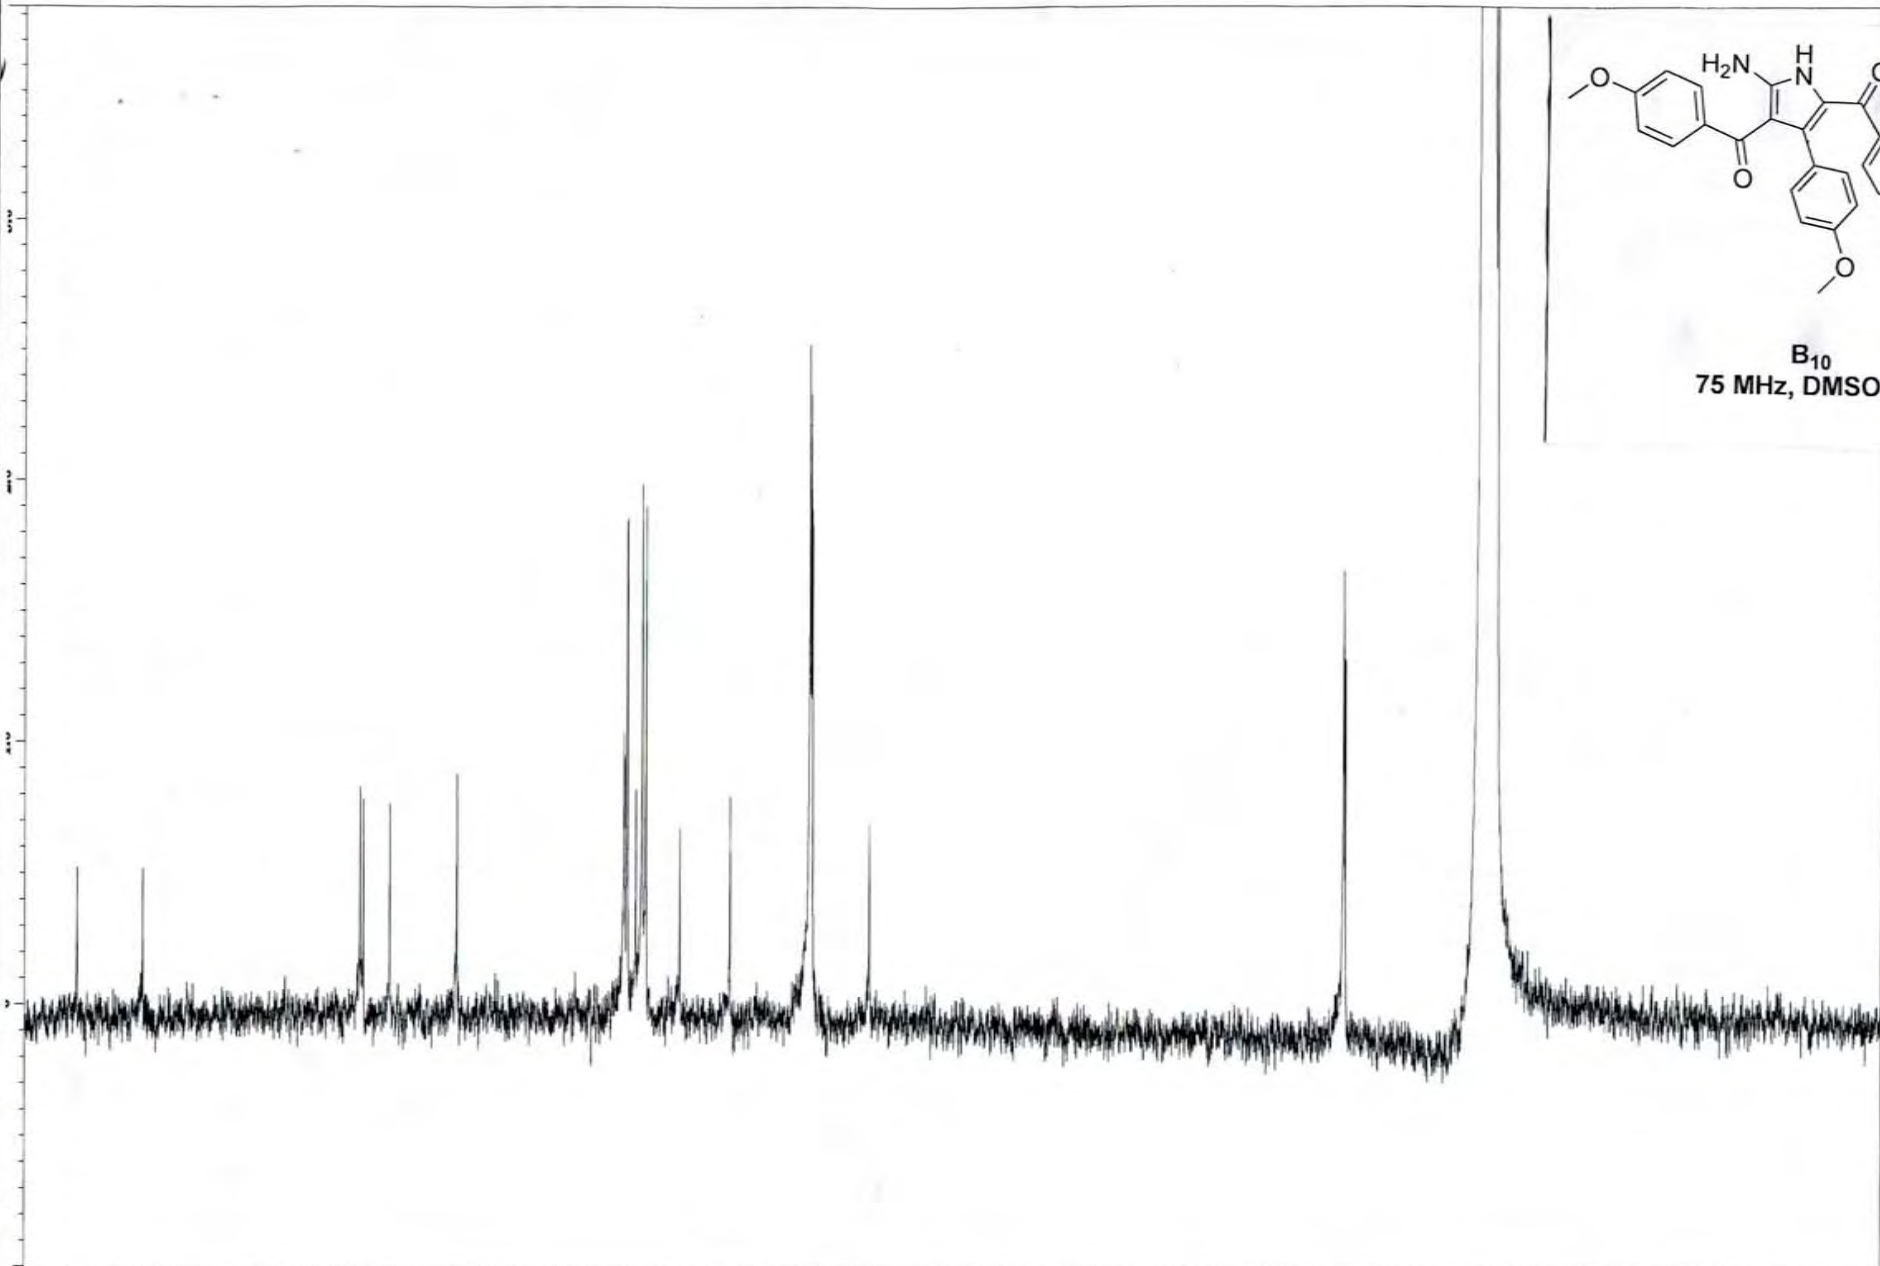

| Chemical Shift (ppm) |
|----------------------|
| 191.6315             |
| 184.6235             |
| 161.2938             |
| 160.9426             |
| 158.1180             |
| 150.9344             |
| 132.9867             |
| 132.9104             |
| 132.6356             |
| 131.7119             |
| 131.0401             |
| 130.6355             |
| 126.9787             |
| 121.6044             |
| 113.0313             |
| 112.8939             |
| 112.7794             |
| 106.5958             |
| 55.6996              |
| 55.6233              |
| 40.3093              |
| 40.0269              |
| 39.7521              |

X : parts per Million : 13C

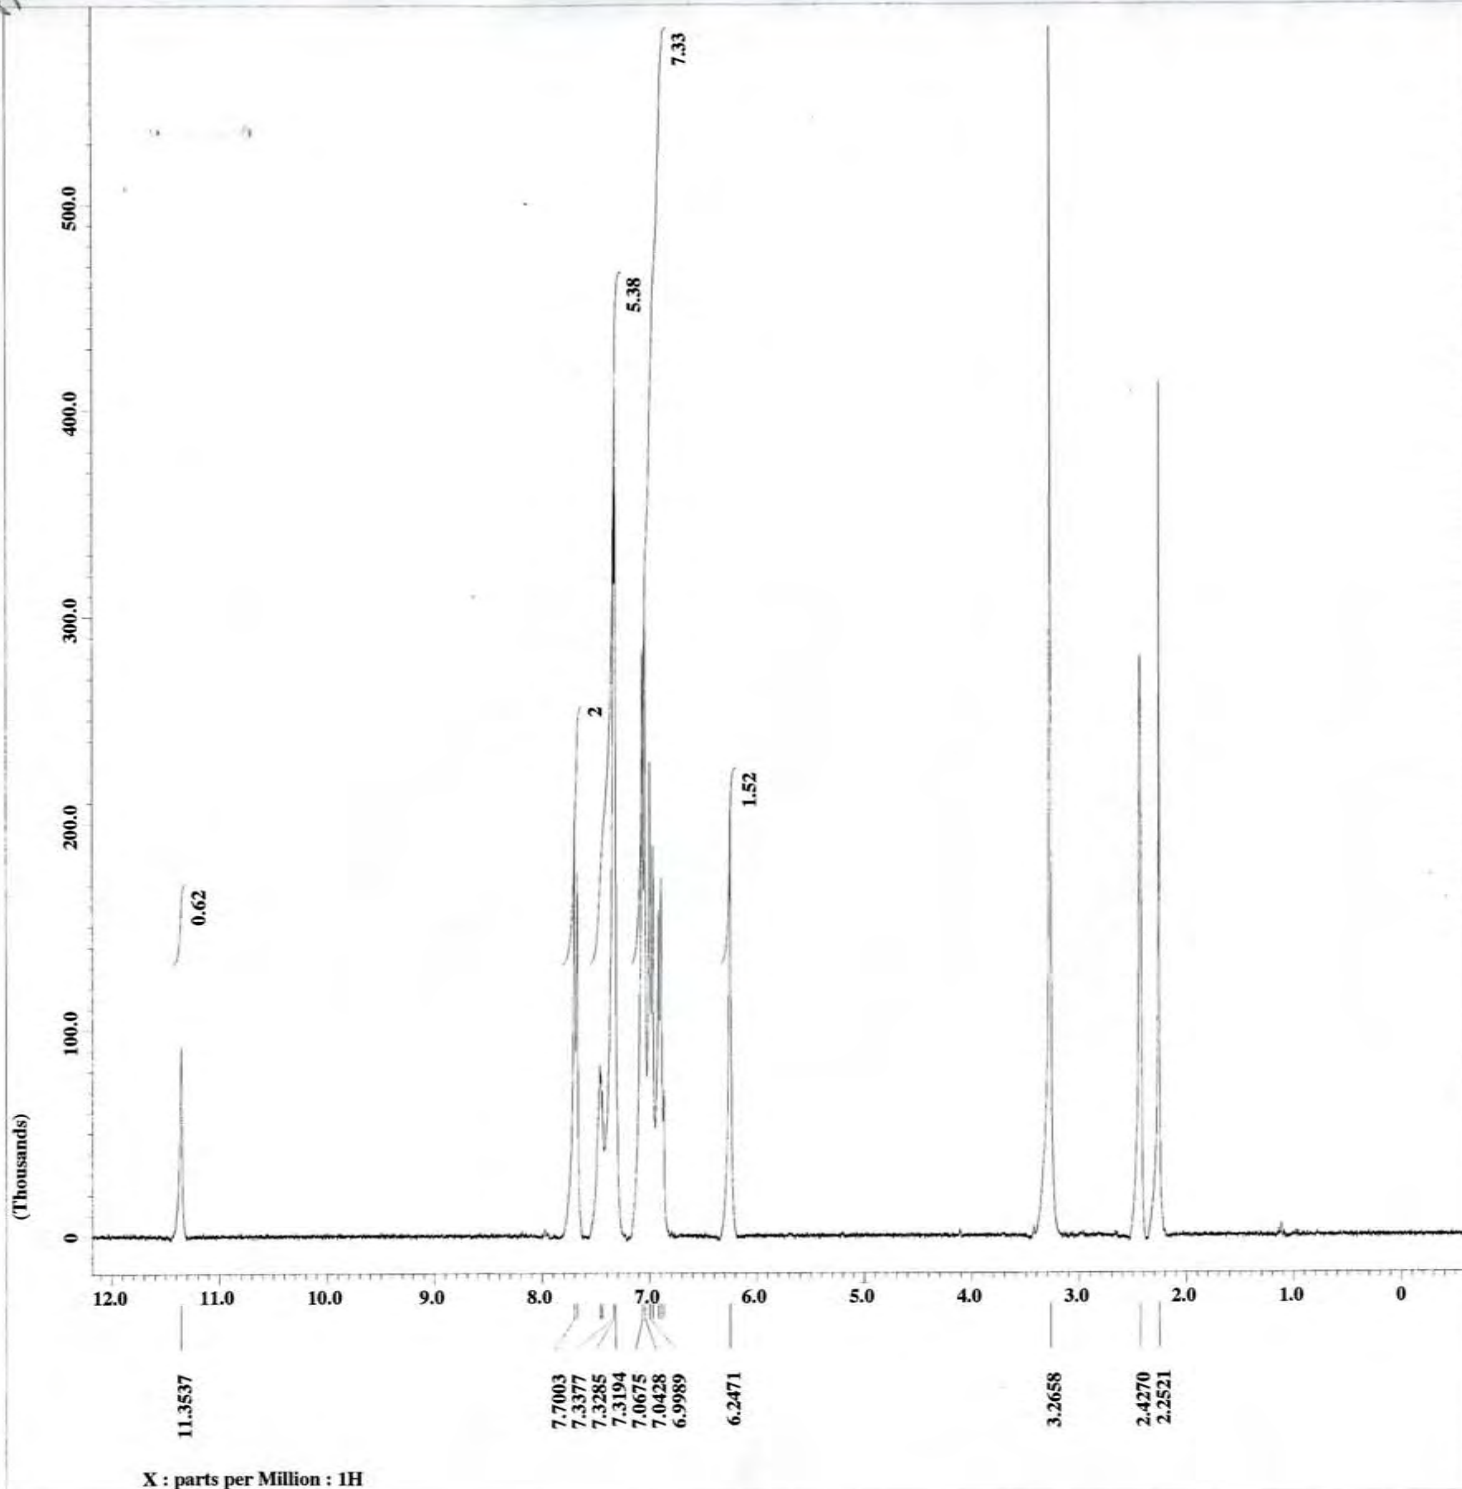

Filename = id spectrum-132.jdf  
 Author = alex  
 Experiment = single\_pulse.exp  
 Sample\_id = S#674454  
 Solvent = DMSO-D6  
 Creation\_time = 9-DEC-2010 18:37:37  
 Revision\_time = 9-DEC-2010 18:57:36  
 Current\_time = 9-DEC-2010 18:57:42

Comment = Single Pulse Experime  
 Data\_format = 1D REAL  
 Dim\_size = 16384  
 Dim\_title = 1H  
 Dim\_units = [ppm]  
 Dimensions = X  
 Site = Eclipse+ 300  
 Spectrometer = DELTA\_NMR

Field\_strength = 7.0586013[T] (300[MHz]  
 X\_acq\_duration = 3.6339712[s]  
 X\_domain = 1H  
 X\_freq = 300.52965592[MHz]  
 X\_offset = 5[ppm]  
 X\_points = 16384  
 X\_prescans = 0  
 X\_resolution = 0.27518105[Hz]  
 X\_sweep = 4.50856628[kHz]  
 Clipped = FALSE  
 Mod\_return = 1  
 Scans = 8  
 Total\_scans = 8

X\_90\_width = 16[us]  
 X\_acq\_time = 3.6339712[s]  
 X\_angle = 45[deg]  
 X\_pulse = 8[us]  
 Initial\_wait = 1[s]  
 Phase\_preset = 3[us]  
 Recvr\_gain = 15  
 Relaxation\_delay = 4[s]  
 Temp\_get = 23.3[dC]  
 Unblank\_time = 2[us]

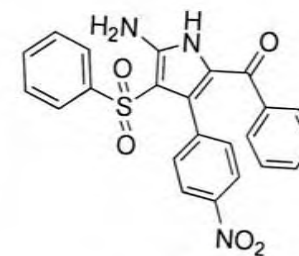

B<sub>11</sub>  
 300 MHz, DMSO-d<sub>6</sub>



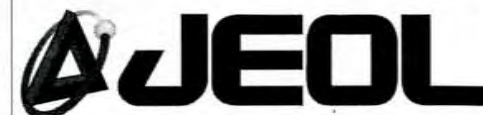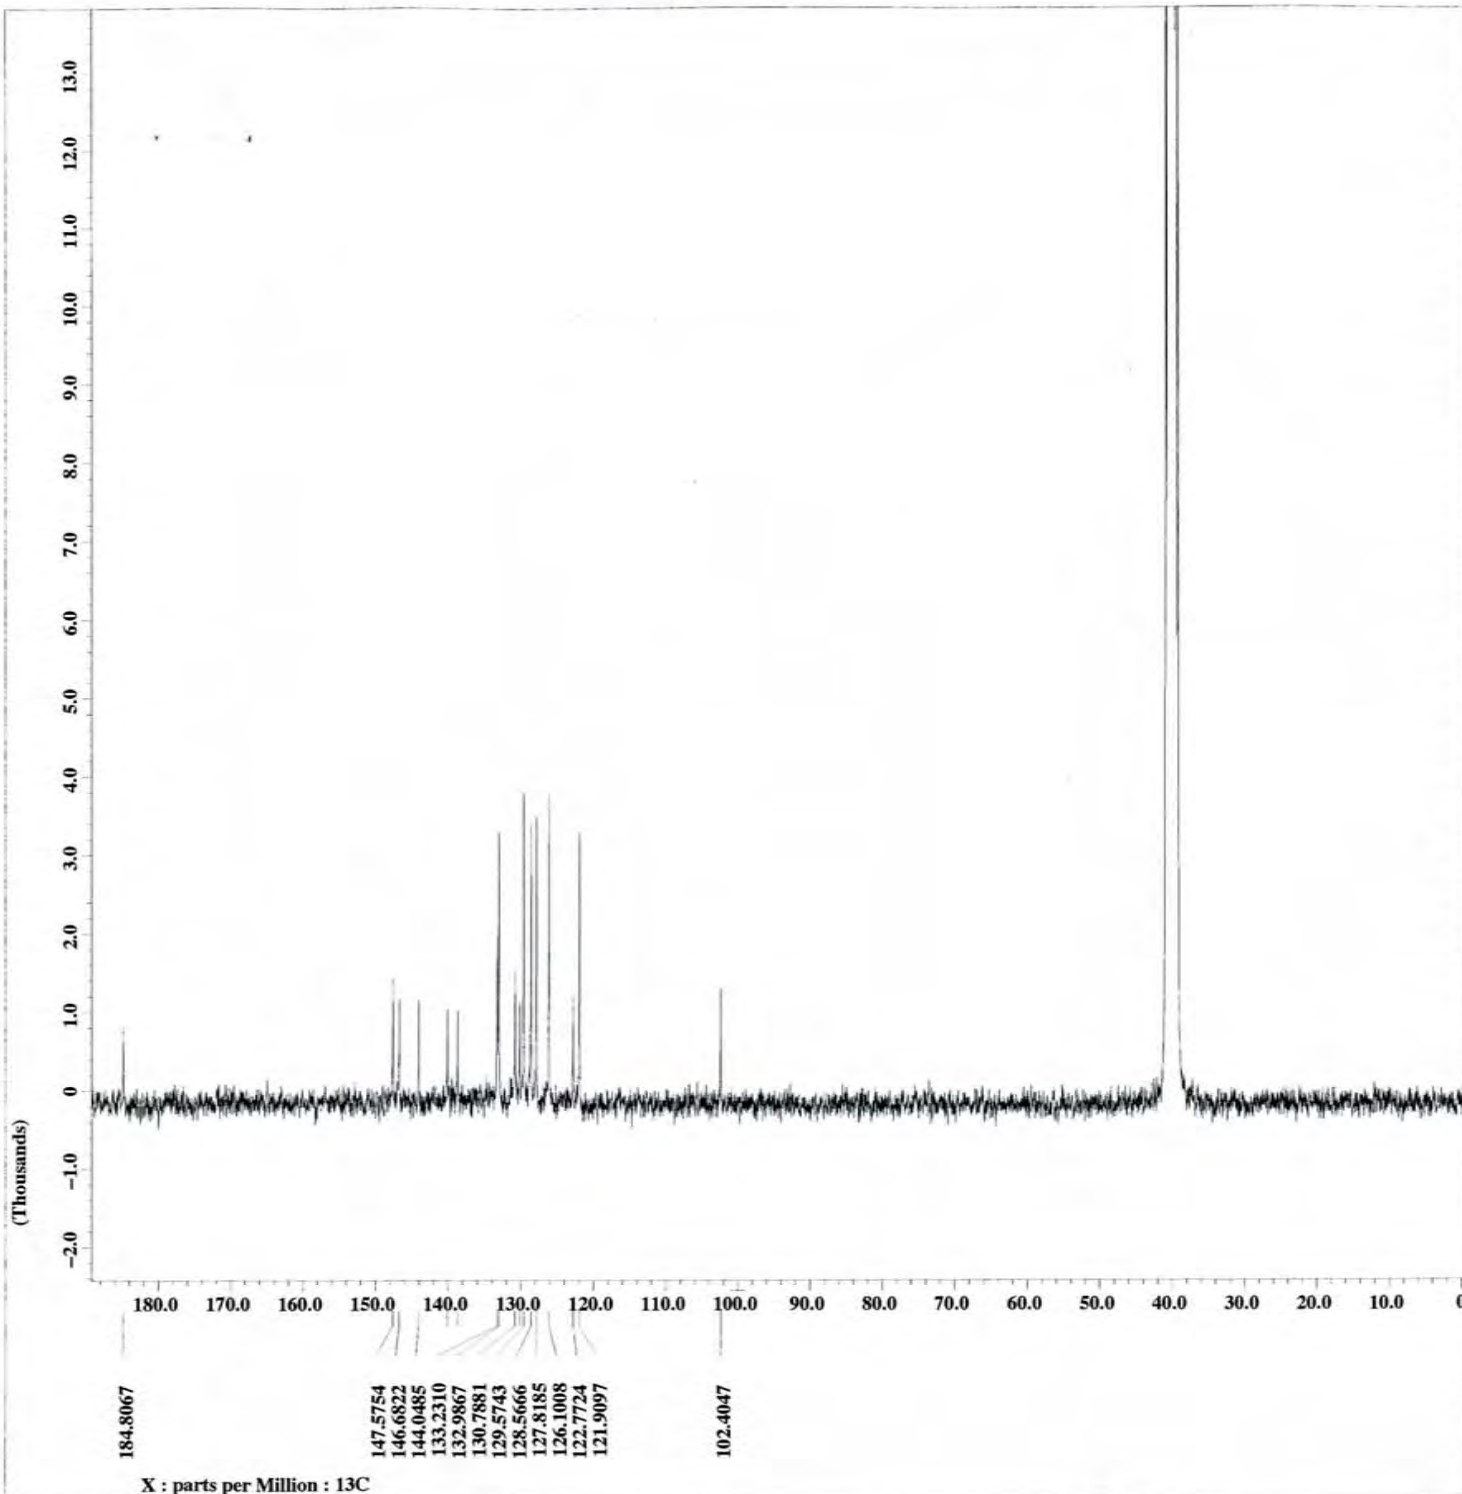

Filename = ld\_13c\_spectrum-74.jd  
Author = alex  
Experiment = single\_pulse\_dec  
Sample\_id = S#709603  
Solvent = DMSO-D6  
Creation\_time = 10-DEC-2010 07:44:17  
Revision\_time = 10-DEC-2010 09:36:55  
Current\_time = 10-DEC-2010 09:37:11

Comment = Single Pulse with Bro  
Data\_format = 1D\_COMPLEX  
Dim\_size = 32768  
Dim\_title = 13C  
Dim\_units = [ppm]  
Dimensions = X  
Site = Eclipse+ 300  
Spectrometer = DELTA\_NMR

Field\_strength = 7.0586013[T] (300[MHz])  
X\_acq\_duration = 1.7334272[s]  
X\_domain = 13C  
X\_freq = 75.56823426[MHz]  
X\_offset = 100[ppm]  
X\_points = 32768  
X\_prescans = 4  
X\_resolution = 0.57689184[Hz]  
X\_sweep = 18.90359168[kHz]  
Irr\_domain = 1H  
Irr\_freq = 300.52965592[MHz]  
Irr\_offset = 5[ppm]  
Clipped = FALSE  
Mod\_return = 1  
Scans = 16000  
Total\_scans = 16000

X\_90\_width = 8.1[us]  
X\_acq\_time = 1.7334272[s]  
X\_angle = 30[deg]  
X\_pulse = 2.7[us]  
Initial\_wait = 1[s]  
Phase\_preset = 3[us]  
Recvr\_gain = 15  
Relaxation\_delay = 1[s]  
Temp\_get = 21.9[dC]  
Unblank\_time = 2[us]

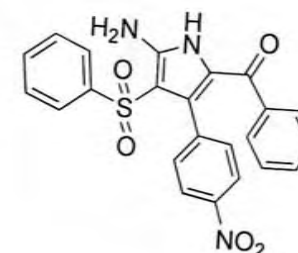

B<sub>11</sub>  
75 MHz, DMSO-d<sub>6</sub>

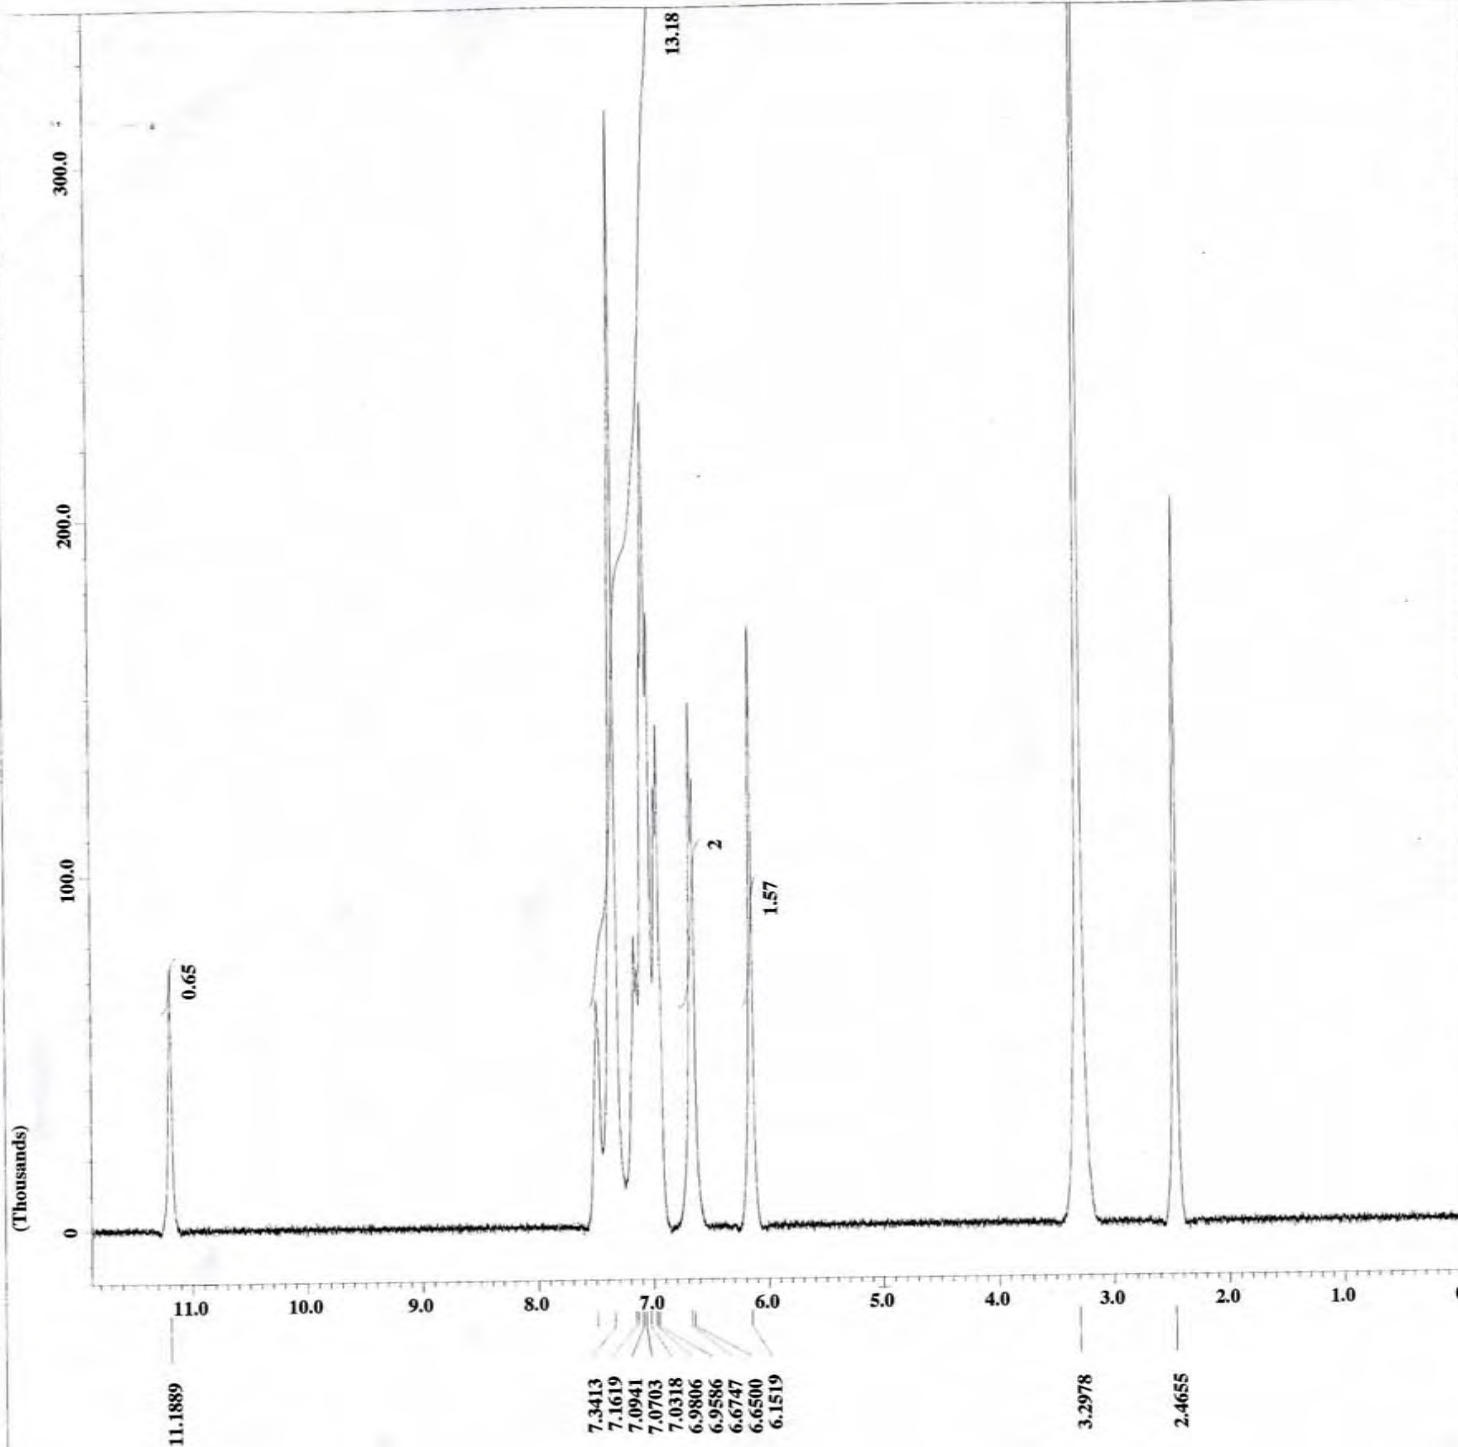

Filename = 1d\_spectrum-188.jdf  
 Author = alex  
 Experiment = single pulse.exp  
 Sample\_id = S#431531  
 Solvent = DMSO-D6  
 Creation\_time = 15-DEC-2010 11:52:44  
 Revision\_time = 15-DEC-2010 15:23:10  
 Current\_time = 15-DEC-2010 15:23:25

Comment = Single Pulse Experime  
 Data\_format = 1D REAL  
 Dim\_size = 16384  
 Dim\_title = 1H  
 Dim\_units = [ppm]  
 Dimensions = X  
 Site = Eclipse+ 300  
 Spectrometer = DELTA\_NMR

Field\_strength = 7.0586013[T] (300[MHz])  
 X\_acq\_duration = 3.6339712[s]  
 X\_domain = 1H  
 X\_freq = 300.52965592[MHz]  
 X\_offset = 5[ppm]  
 X\_points = 16384  
 X\_prescans = 0  
 X\_resolution = 0.27518105[Hz]  
 X\_sweep = 4.50856628[kHz]  
 Clipped = FALSE  
 Mod\_return = 1  
 Scans = 8  
 Total\_scans = 8

X\_90\_width = 16[us]  
 X\_acq\_time = 3.6339712[s]  
 X\_angle = 45[deg]  
 X\_pulse = 8[us]  
 Initial\_wait = 1[s]  
 Phase\_preset = 3[us]  
 Recvr\_gain = 15  
 Relaxation\_delay = 4[s]  
 Temp\_get = 23[dC]  
 Unblank\_time = 2[us]

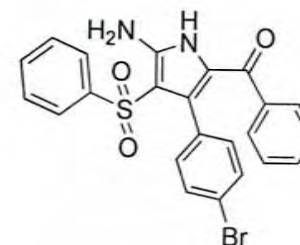

B<sub>12</sub>  
 300 MHz, DMSO-d<sub>6</sub>

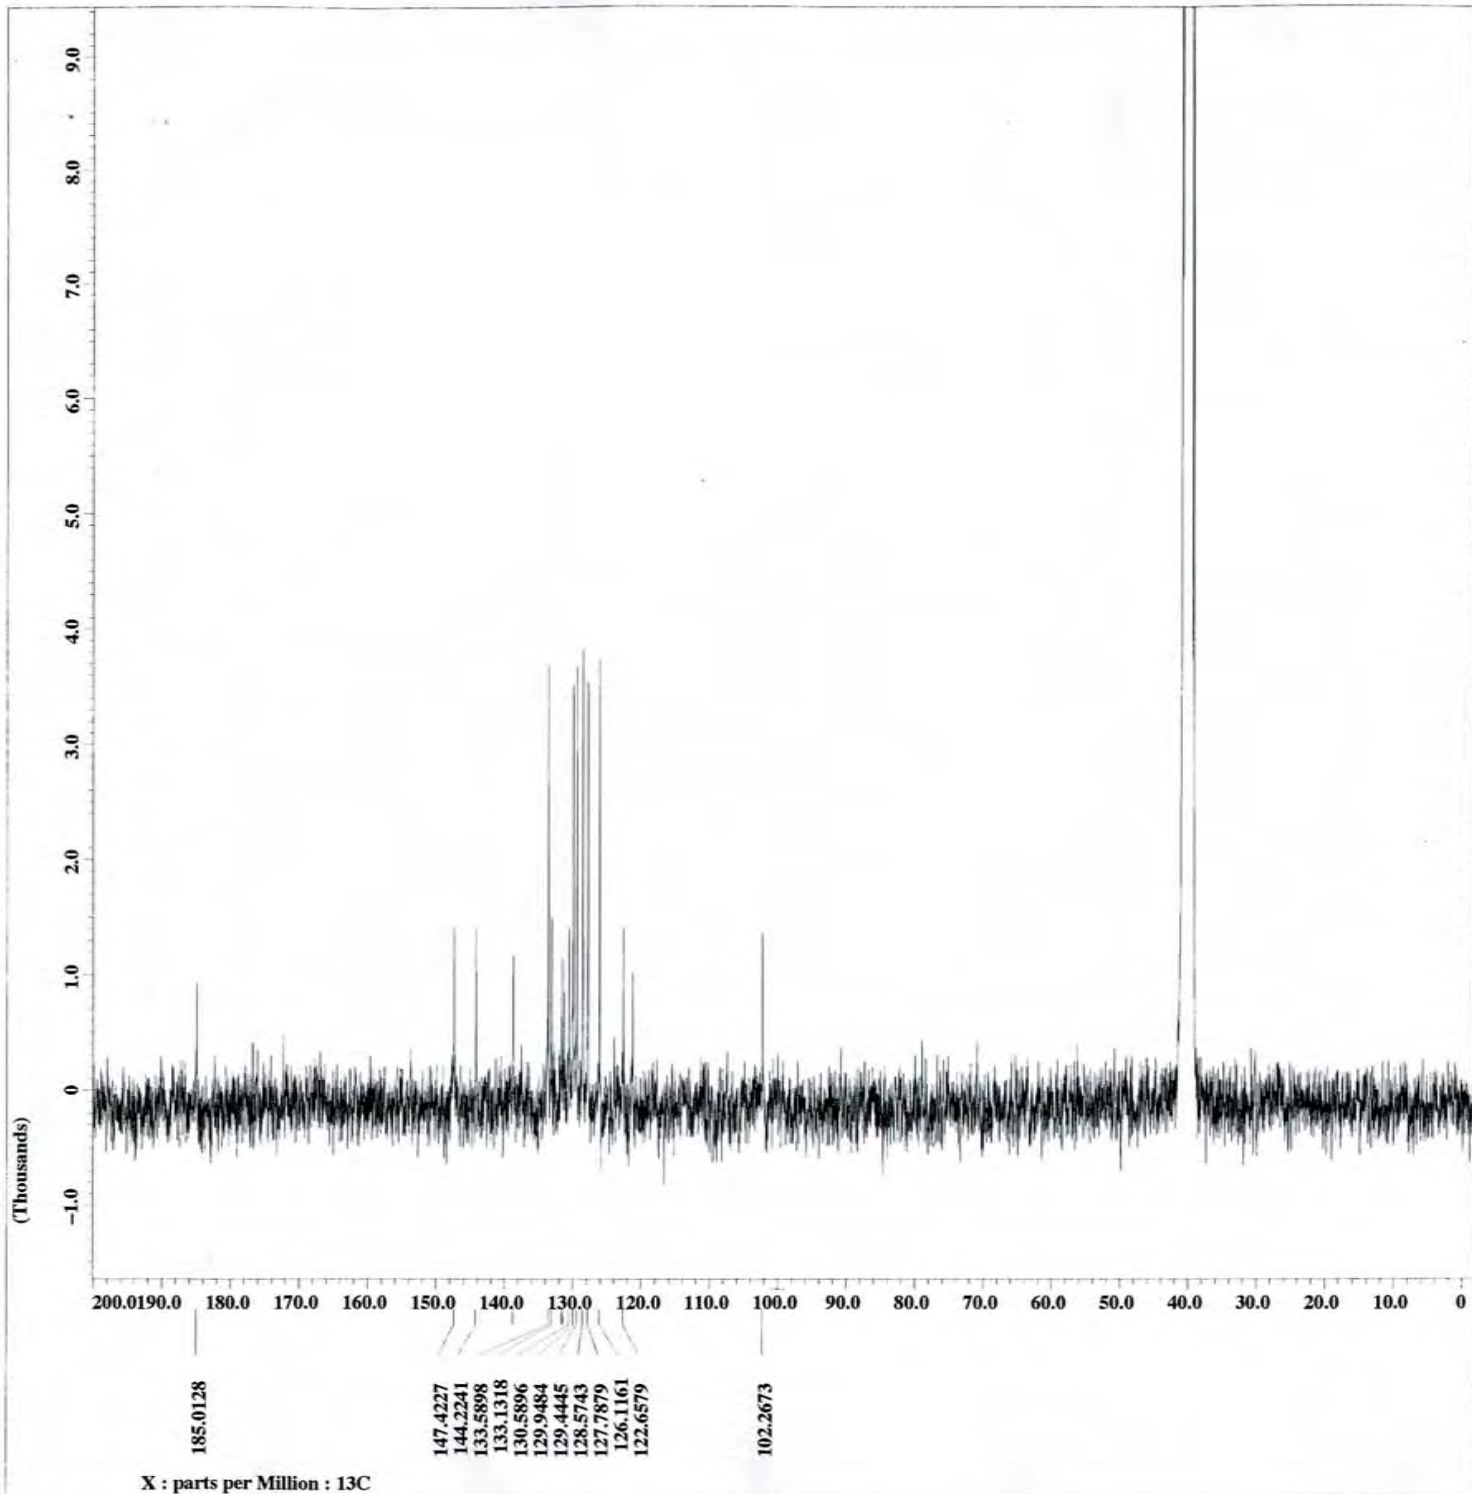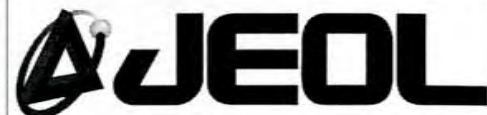

Filename = ld\_13c\_spectrum-99.jd  
 Author = alex  
 Experiment = single\_pulse\_dec  
 Sample\_id = S#434222  
 Solvent = DMSO-D6  
 Creation\_time = 15-DEC-2010 14:58:38  
 Revision\_time = 15-DEC-2010 15:19:37  
 Current\_time = 15-DEC-2010 15:19:42

Comment = Single Pulse with Bro  
 Data\_format = 1D\_COMPLEX  
 Dim\_size = 32768  
 Dim\_title = 13C  
 Dim\_units = [ppm]  
 Dimensions = X  
 Site = Eclipse+ 300  
 Spectrometer = DELTA\_NMR

Field\_strength = 7.0586013[T] (300[MHz]  
 X\_acq\_duration = 1.7334272[s]  
 X\_domain = 13C  
 X\_freq = 75.56823426[MHz]  
 X\_offset = 100[ppm]  
 X\_points = 32768  
 X\_prescans = 4  
 X\_resolution = 0.57689184[Hz]  
 X\_sweep = 18.90359168[kHz]  
 Irr\_domain = 1H  
 Irr\_freq = 300.52965592[MHz]  
 Irr\_offset = 5[ppm]  
 Clipped = FALSE  
 Mod\_return = 1  
 Scans = 4000  
 Total\_scans = 4000

X\_90\_width = 8.1[us]  
 X\_acq\_time = 1.7334272[s]  
 X\_angle = 30[deg]  
 X\_pulse = 2.7[us]  
 Initial\_wait = 1[s]  
 Phase\_preset = 3[us]  
 Recvr\_gain = 15  
 Relaxation\_delay = 1[s]  
 Temp\_get = 24.4[dC]  
 Unblank\_time = 2[us]

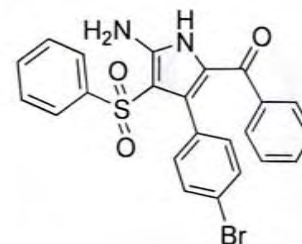

$B_{12}$   
 75 MHz, DMSO- $d_6$



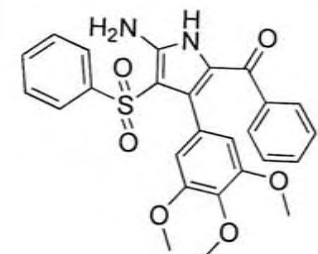

$B_{13}$   
300 MHz, acetone- $d_6$

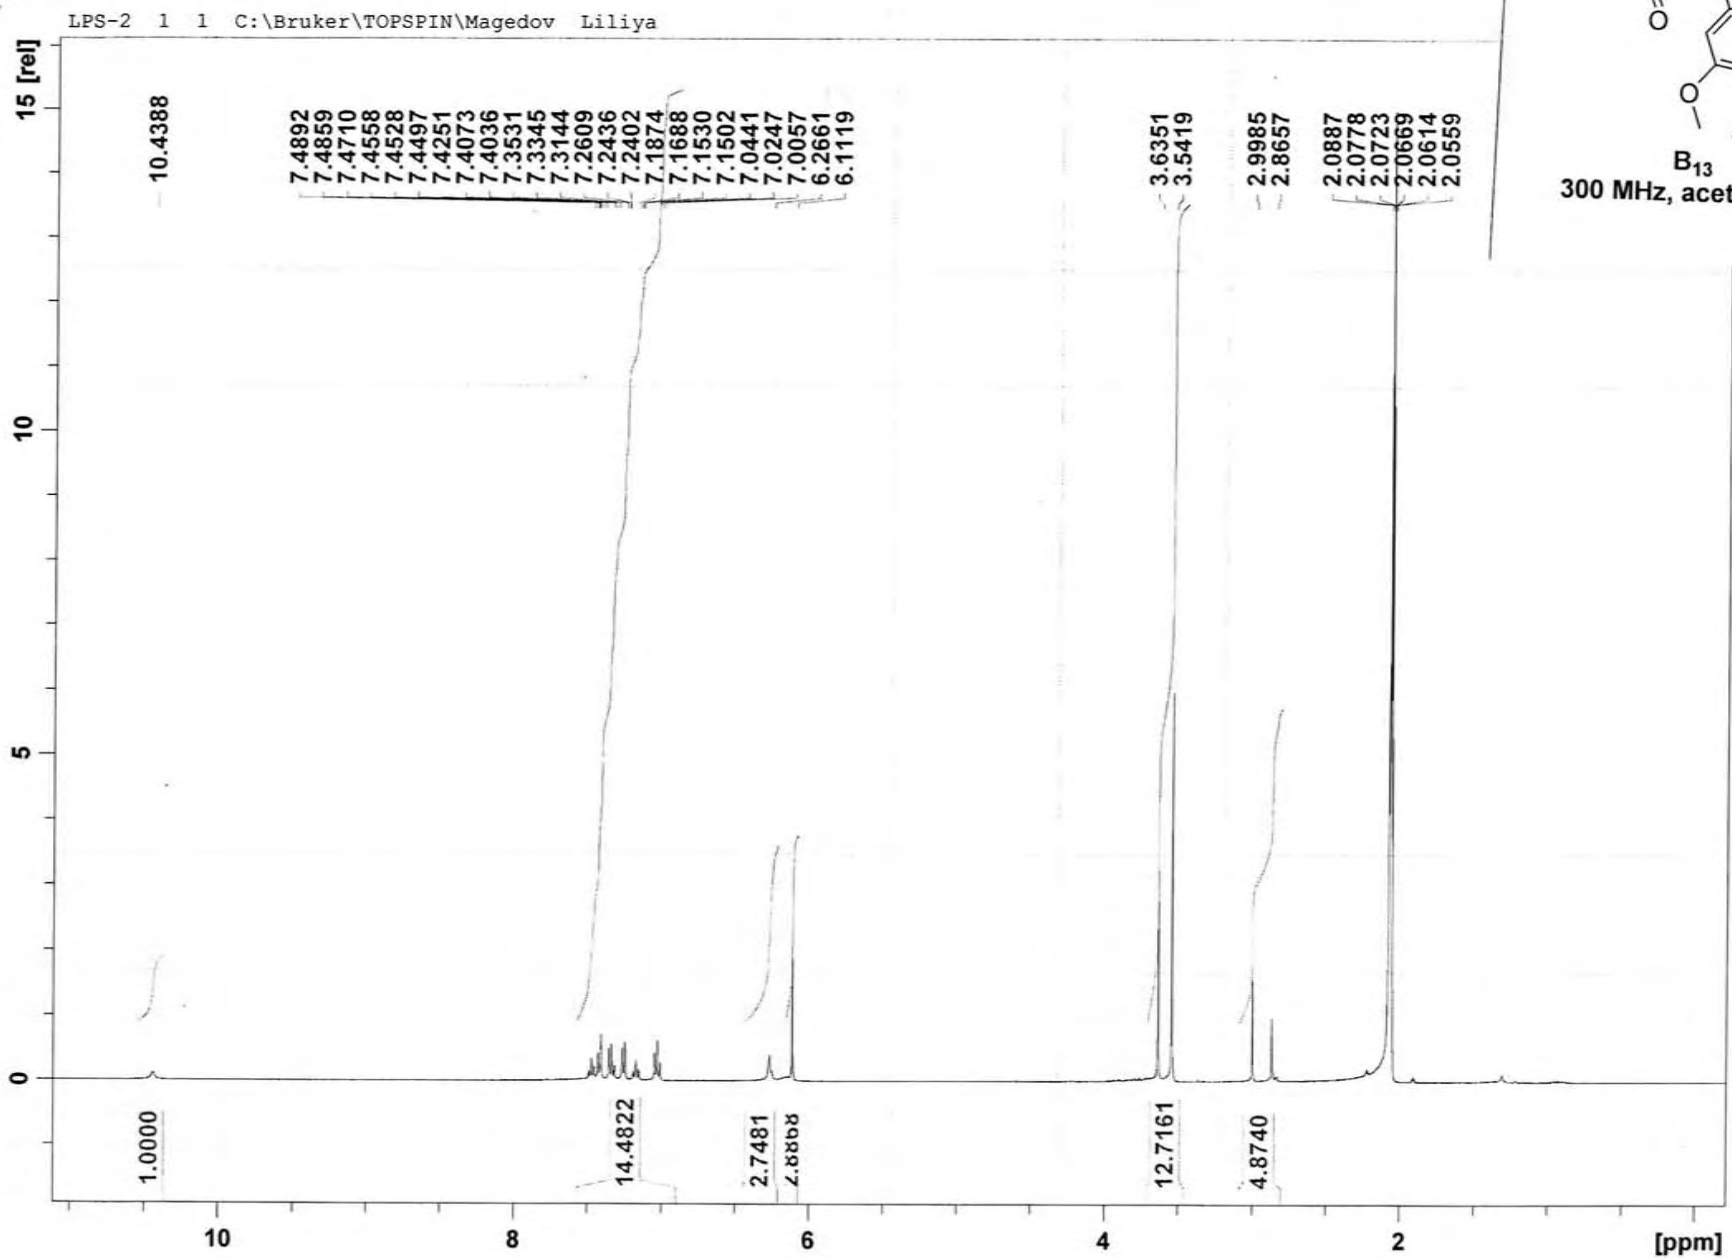

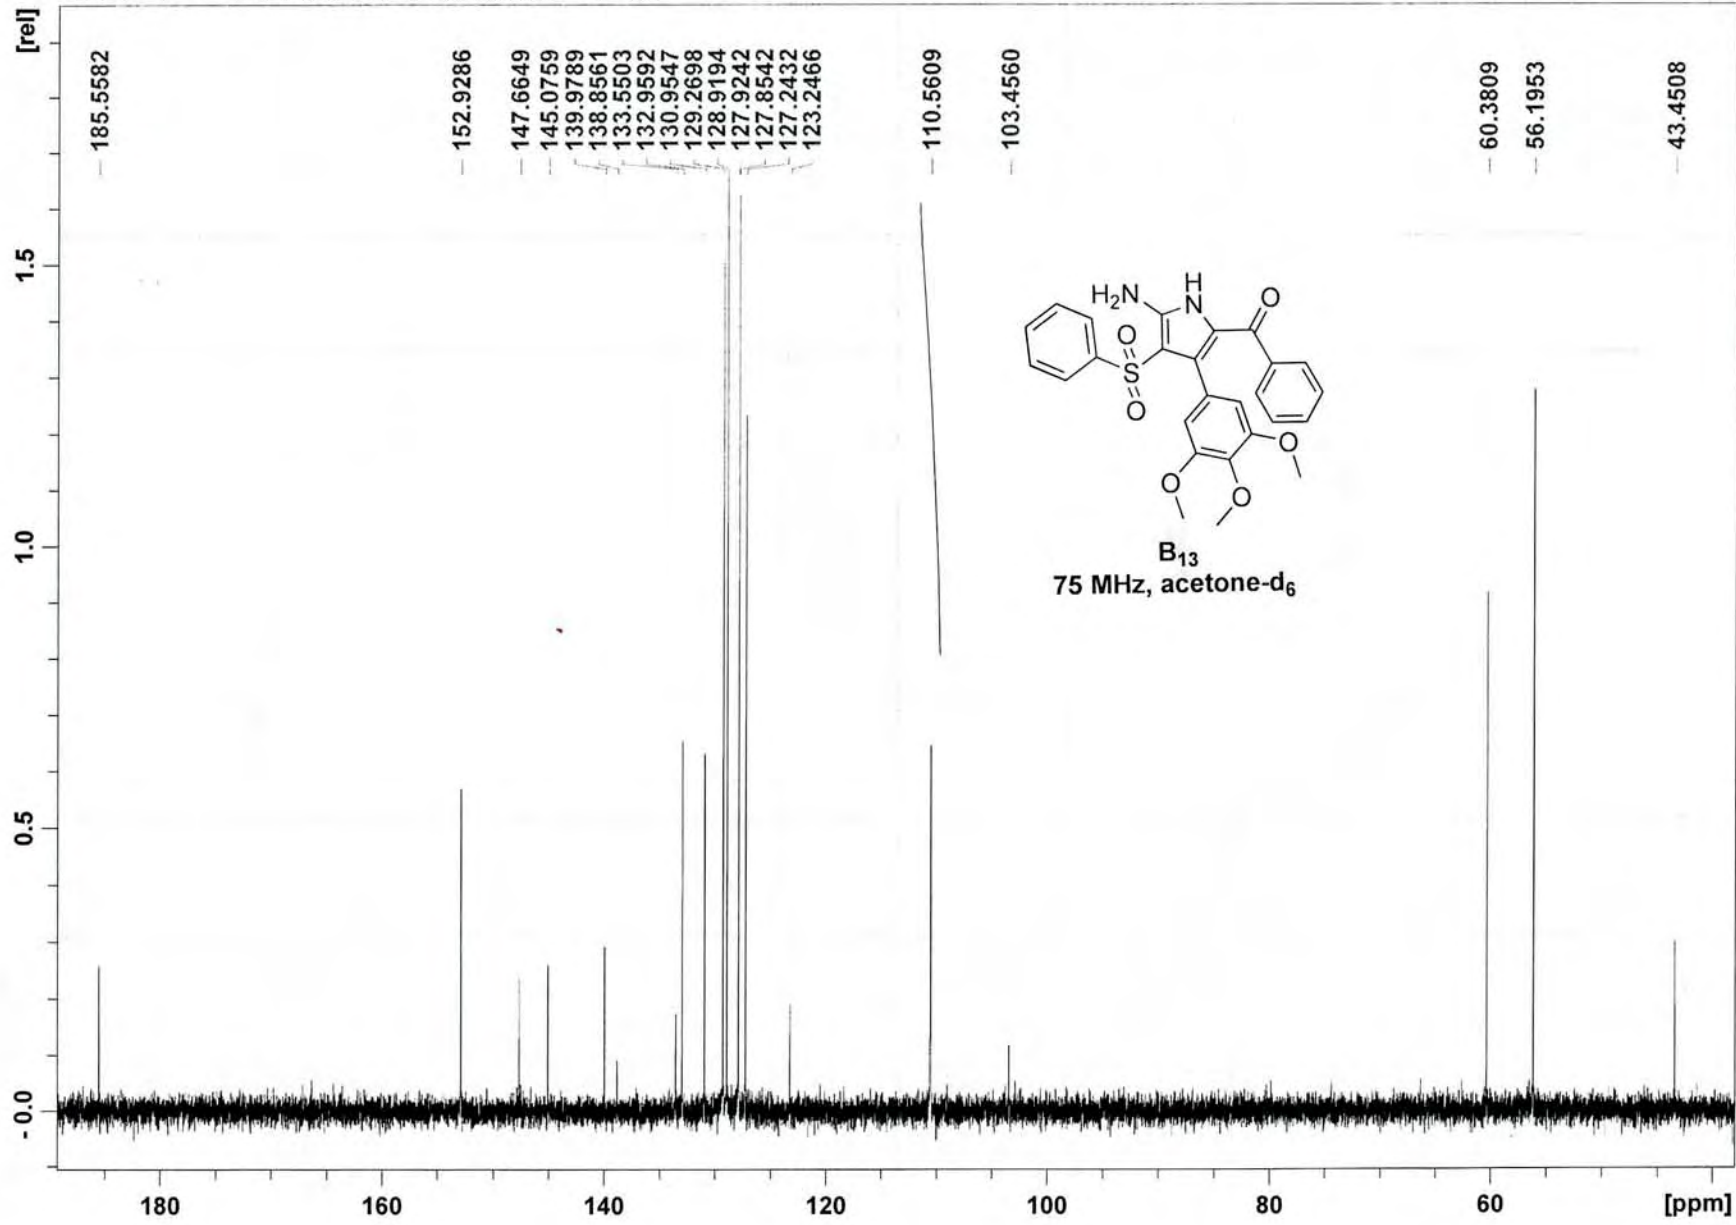

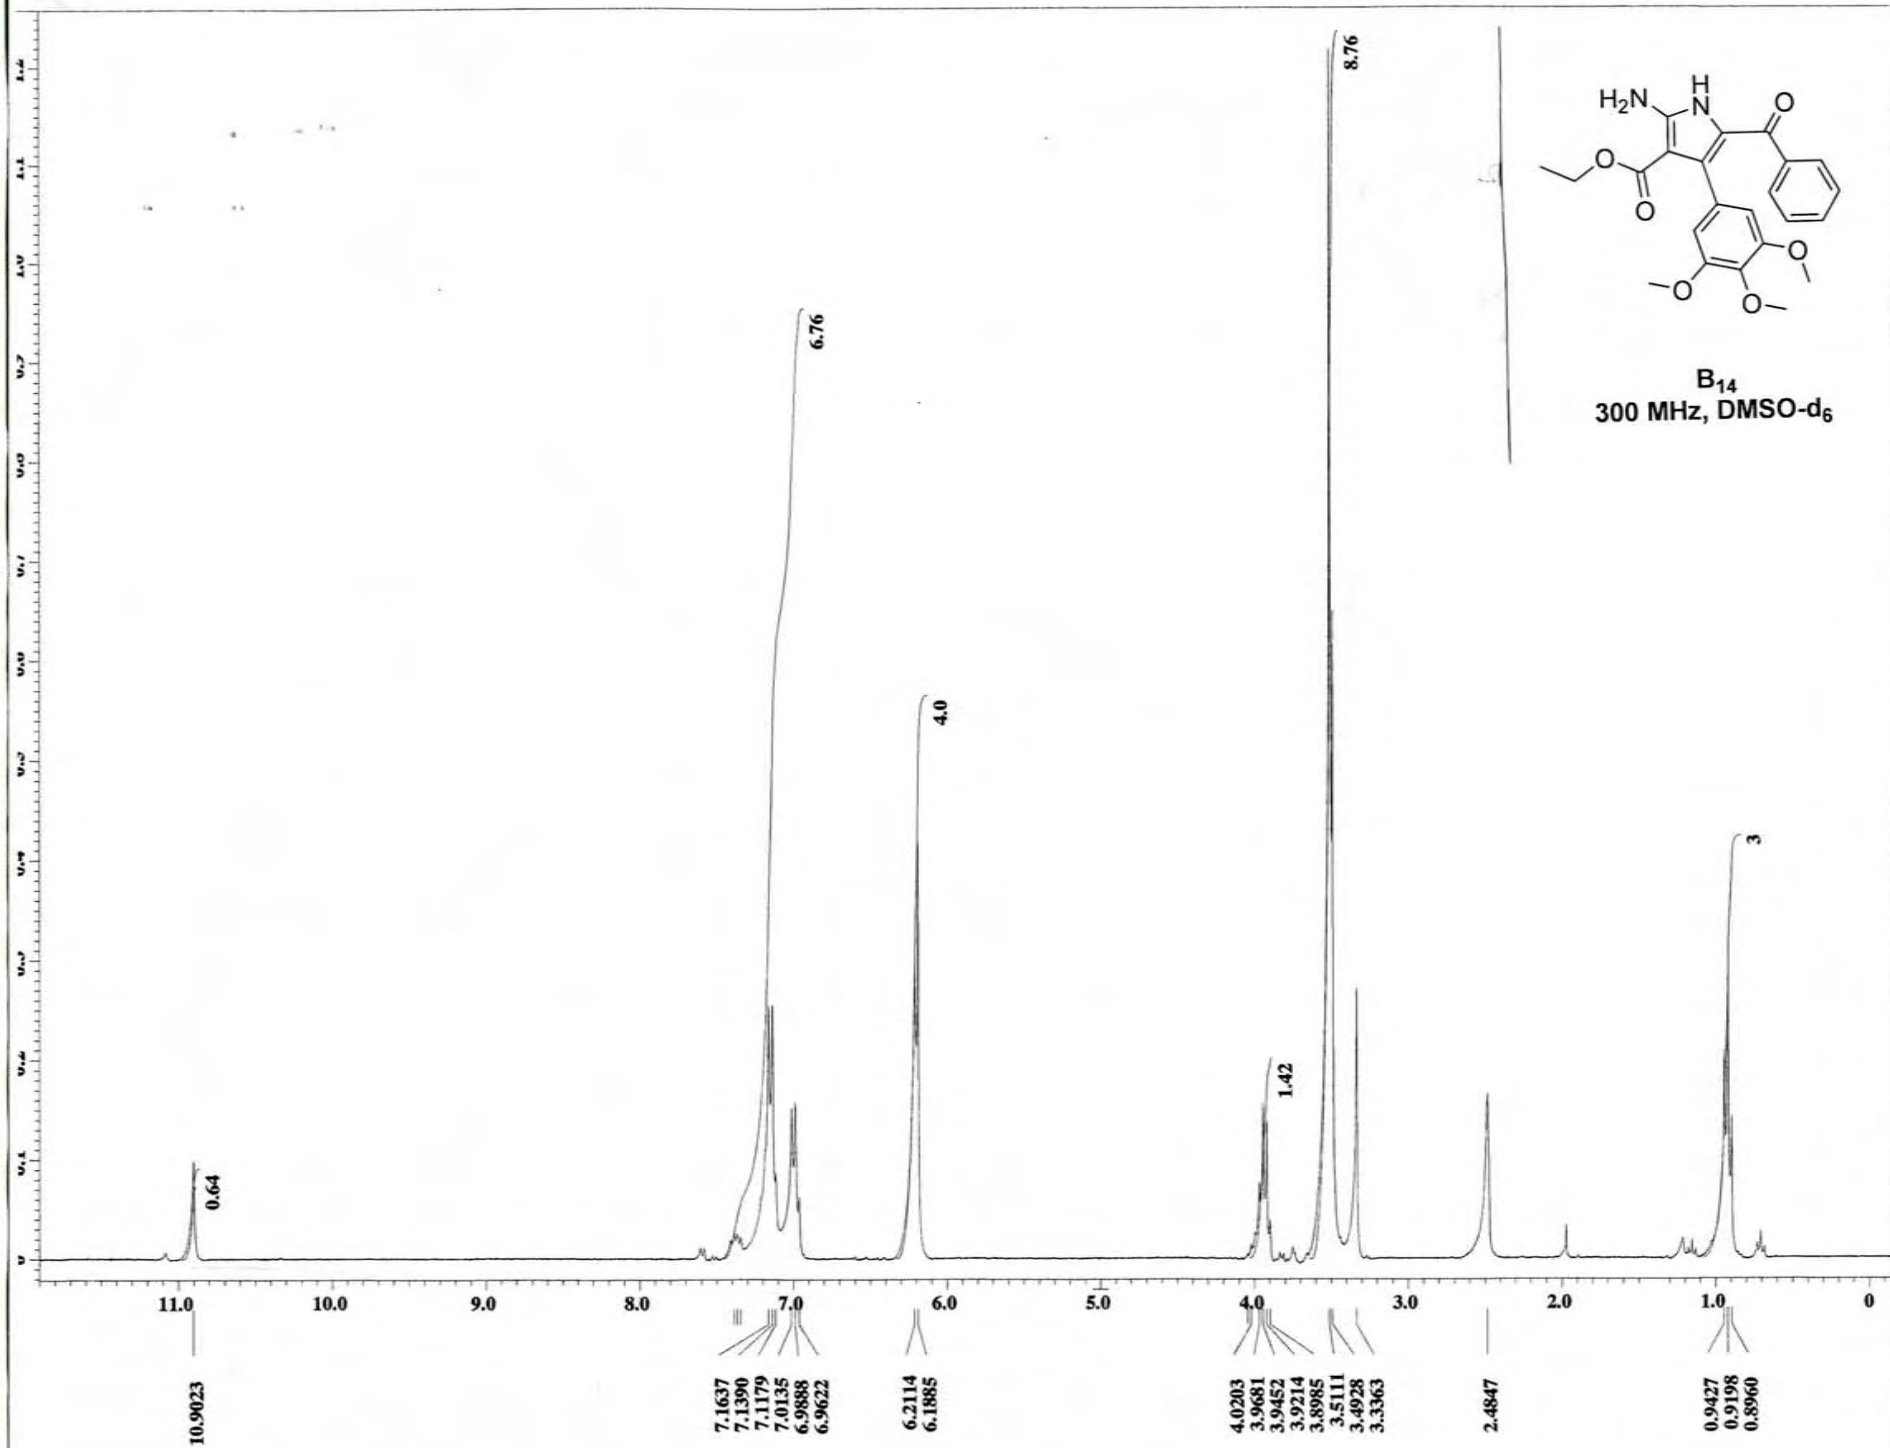

X : parts per Million : 1H



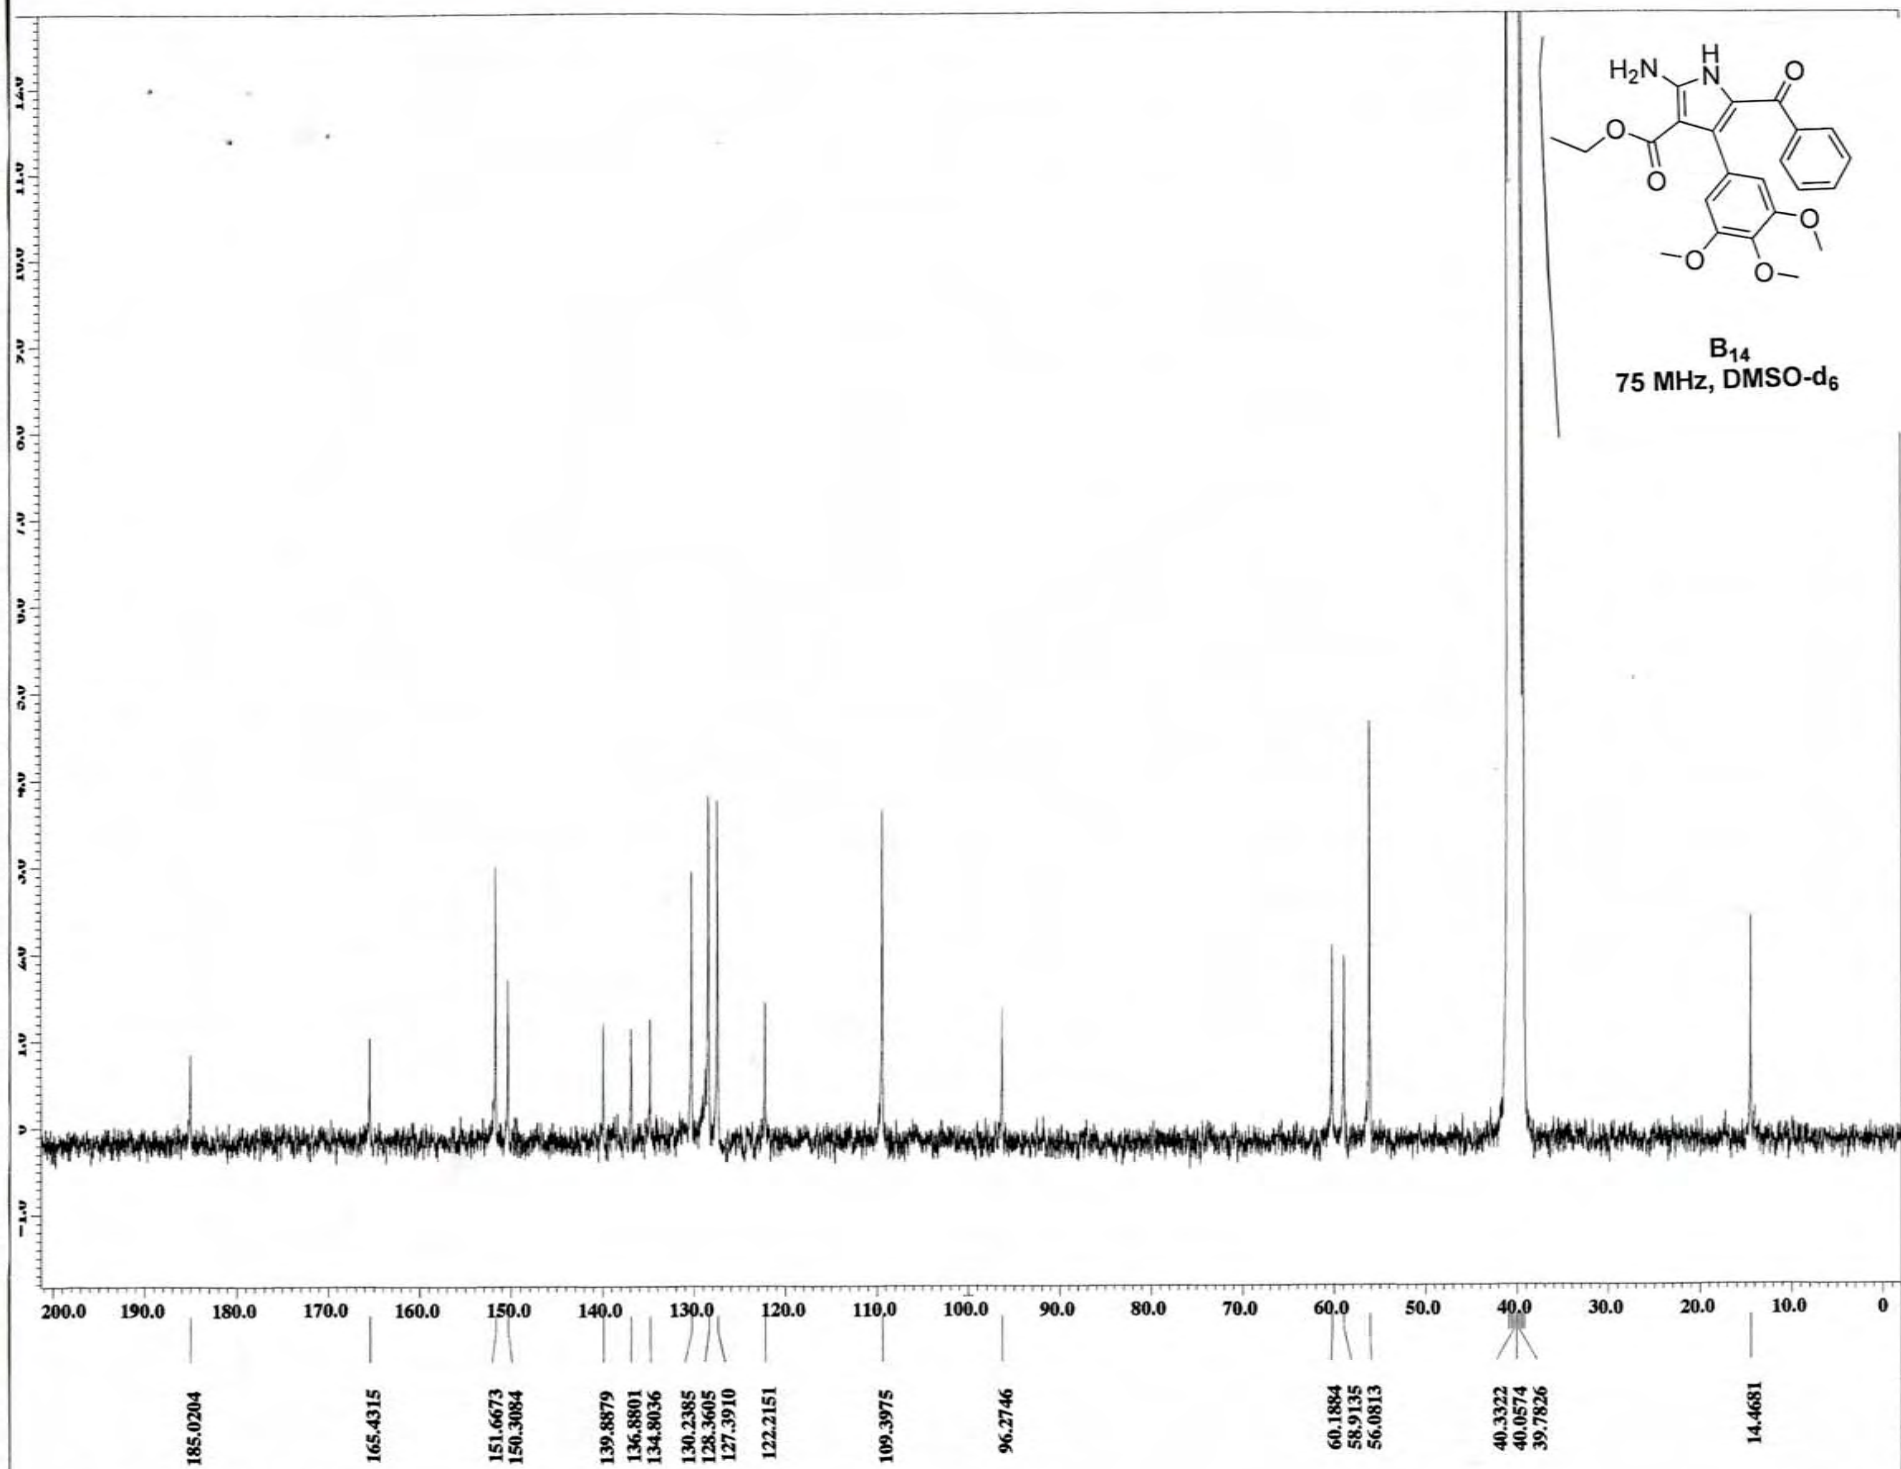

X : parts per Million : 13C

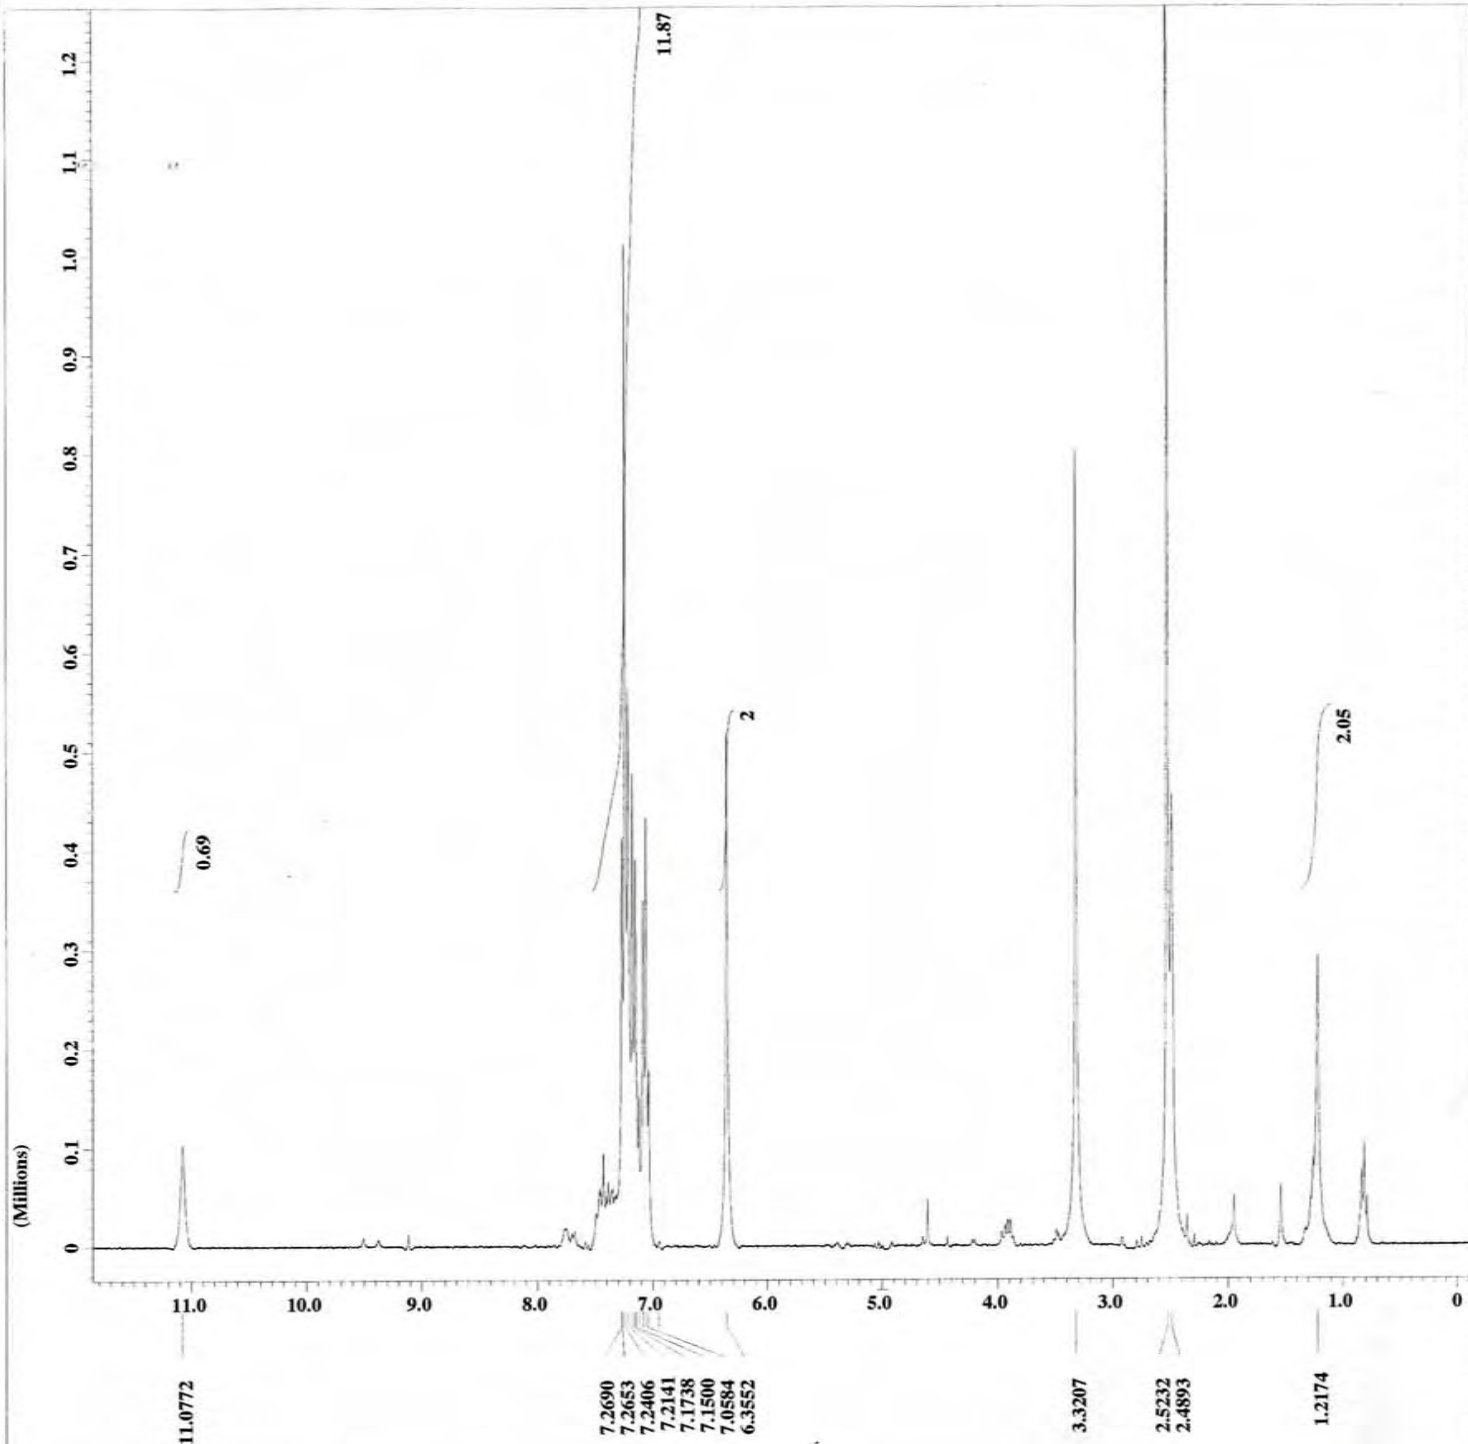

# JEOL

Filename = ld\_spectrum-168.jdf  
 Author = alex  
 Experiment = single\_pulse.exp  
 Sample\_id = S#660649  
 Solvent = DMSO-D6  
 Creation\_time = 13-DEC-2010 18:14:35  
 Revision\_time = 14-DEC-2010 10:24:48  
 Current\_time = 14-DEC-2010 10:24:55

Comment = Single Pulse Experime  
 Data\_format = 1D\_REAL  
 Dim\_size = 16384  
 Dim\_title = 1H  
 Dim\_units = [ppm]  
 Dimensions = X  
 Site = Eclipse+ 300  
 Spectrometer = DELTA\_NMR

Field\_strength = 7.0586013[T] (300[MHz]  
 X\_acq\_duration = 3.6339712[s]  
 X\_domain = 1H  
 X\_freq = 300.52965592[MHz]  
 X\_offset = 5[ppm]  
 X\_points = 16384  
 X\_prescans = 0  
 X\_resolution = 0.27518105[Hz]  
 X\_sweep = 4.50856628[kHz]  
 Clipped = FALSE  
 Mod\_return = 1  
 Scans = 8  
 Total\_scans = 8

X\_90\_width = 16[us]  
 X\_acq\_time = 3.6339712[s]  
 X\_angle = 45[deg]  
 X\_pulse = 8[us]  
 Initial\_wait = 1[s]  
 Phase\_preset = 3[us]  
 Recvr\_gain = 15  
 Relaxation\_delay = 4[s]  
 Temp\_get = 23.3[dC]  
 Unblank\_time = 2[us]

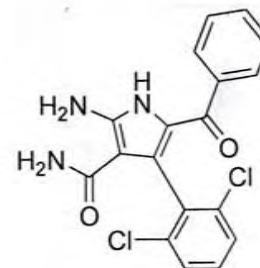

B<sub>15</sub>  
 300 MHz, DMSO-d<sub>6</sub>

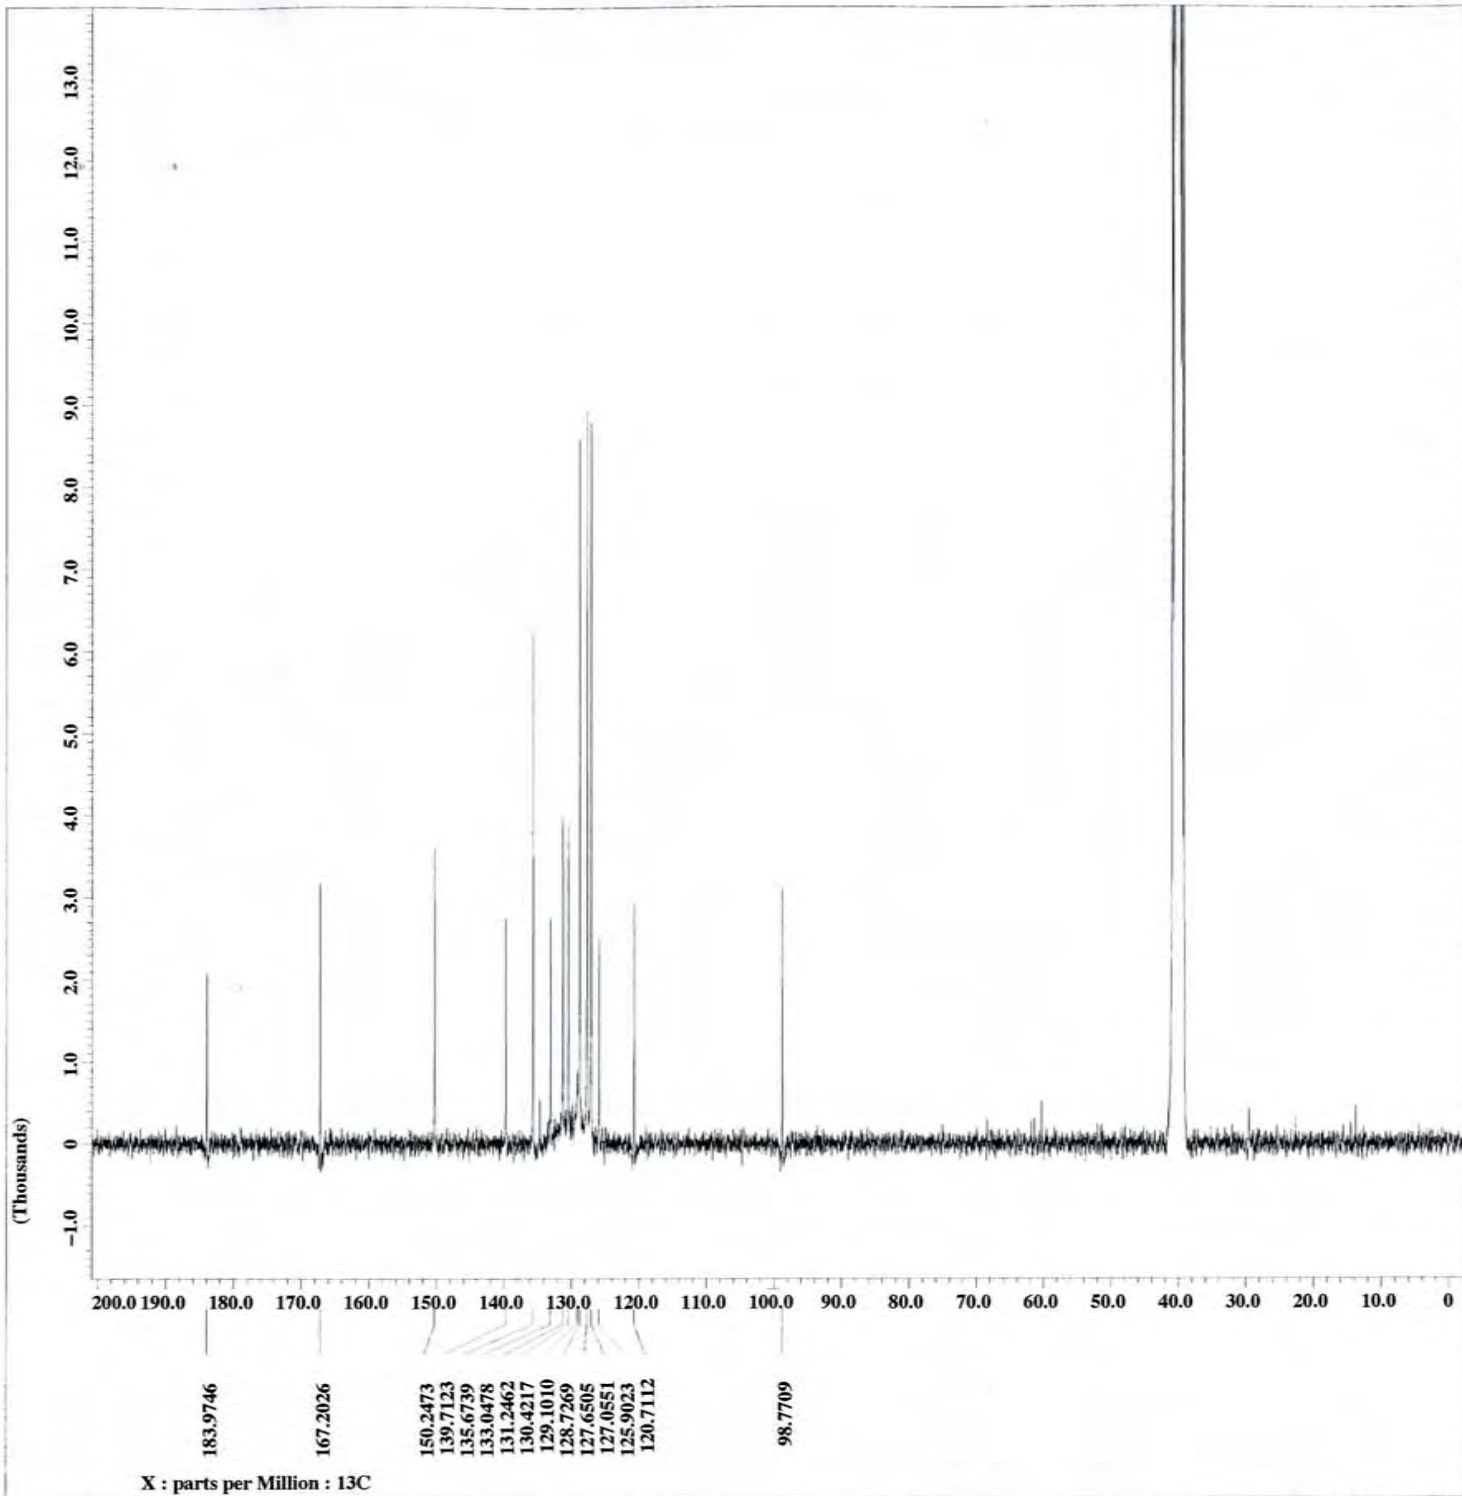

# JEOL

Filename = ld\_13c\_spectrum-95.jd  
 Author = alex  
 Experiment = single\_pulse\_dec  
 Sample\_id = S#663827  
 Solvent = DMSO-D6  
 Creation\_time = 14-DEC-2010 09:30:13  
 Revision\_time = 14-DEC-2010 10:18:43  
 Current\_time = 14-DEC-2010 10:18:48

Comment = Single Pulse with Bro  
 Data\_format = 1D\_REAL  
 Dim\_size = 32768  
 Dim\_title = 13C  
 Dim\_units = [ppm]  
 Dimensions = X  
 Site = Eclipse+ 300  
 Spectrometer = DELTA\_NMR

Field\_strength = 7.0586013[T] (300[MHz])  
 X\_acq\_duration = 1.7334272[s]  
 X\_domain = 13C  
 X\_freq = 75.56823426[MHz]  
 X\_offset = 100[ppm]  
 X\_points = 32768  
 X\_prescans = 4  
 X\_resolution = 0.57689184[Hz]  
 X\_sweep = 18.90359168[kHz]  
 Irr\_domain = 1H  
 Irr\_freq = 300.52965592[MHz]  
 Irr\_offset = 5[ppm]  
 Clipped = FALSE  
 Mod\_return = 1  
 Scans = 20000  
 Total\_scans = 20000

X\_90\_width = 8.1[us]  
 X\_acq\_time = 1.7334272[s]  
 X\_angle = 30[deg]  
 X\_pulse = 2.7[us]  
 Initial\_wait = 1[s]  
 Phase\_preset = 3[us]  
 Recvr\_gain = 15  
 Relaxation\_delay = 1[s]  
 Temp\_get = 22.8[dC]  
 Unblank\_time = 2[us]

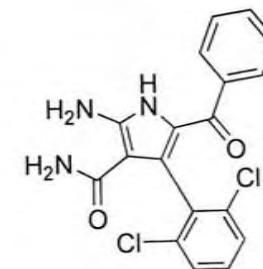

B<sub>15</sub>  
 75 MHz, DMSO-d<sub>6</sub>



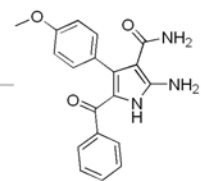

B<sub>16</sub>  
400 MHz  
DMSO-d<sub>6</sub>

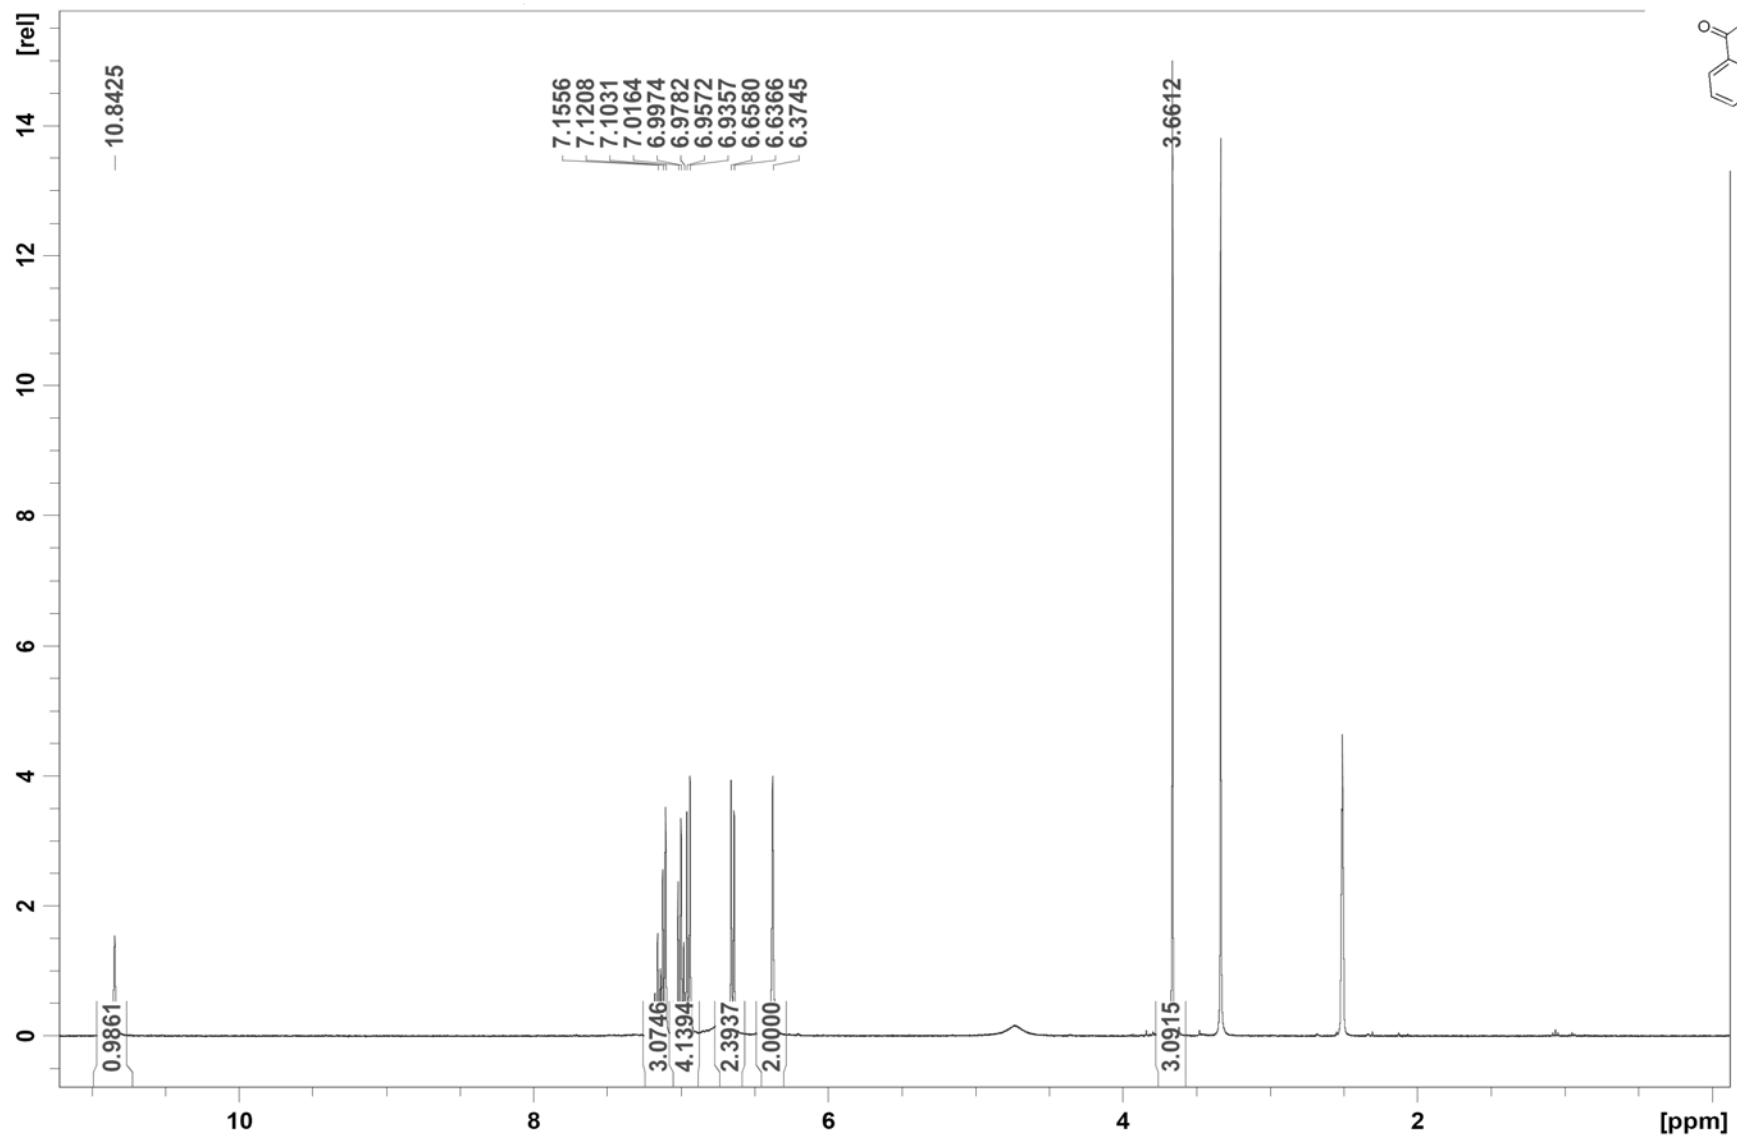

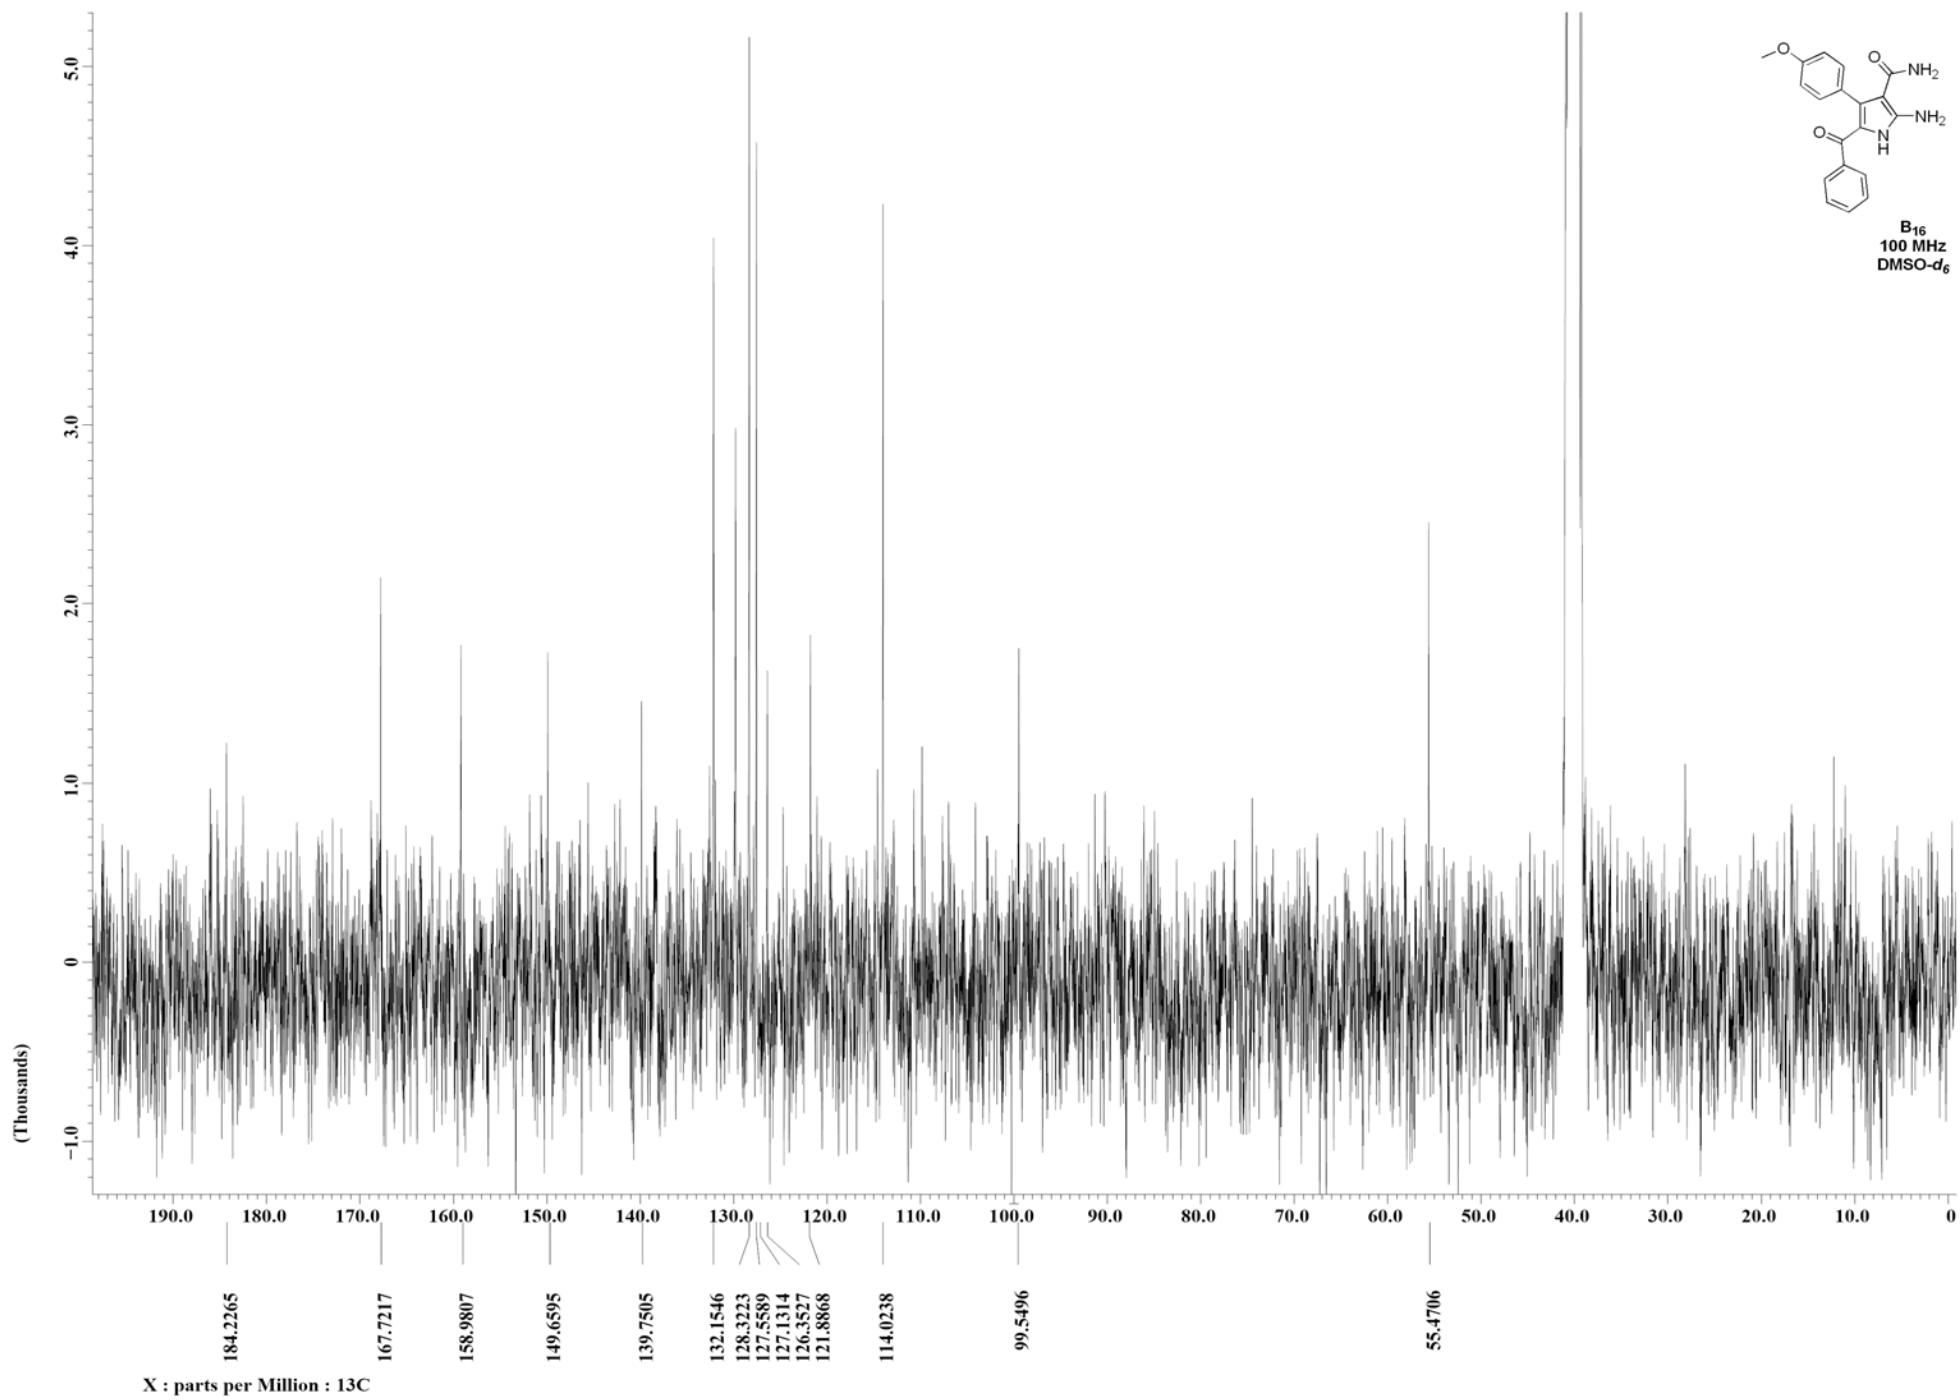

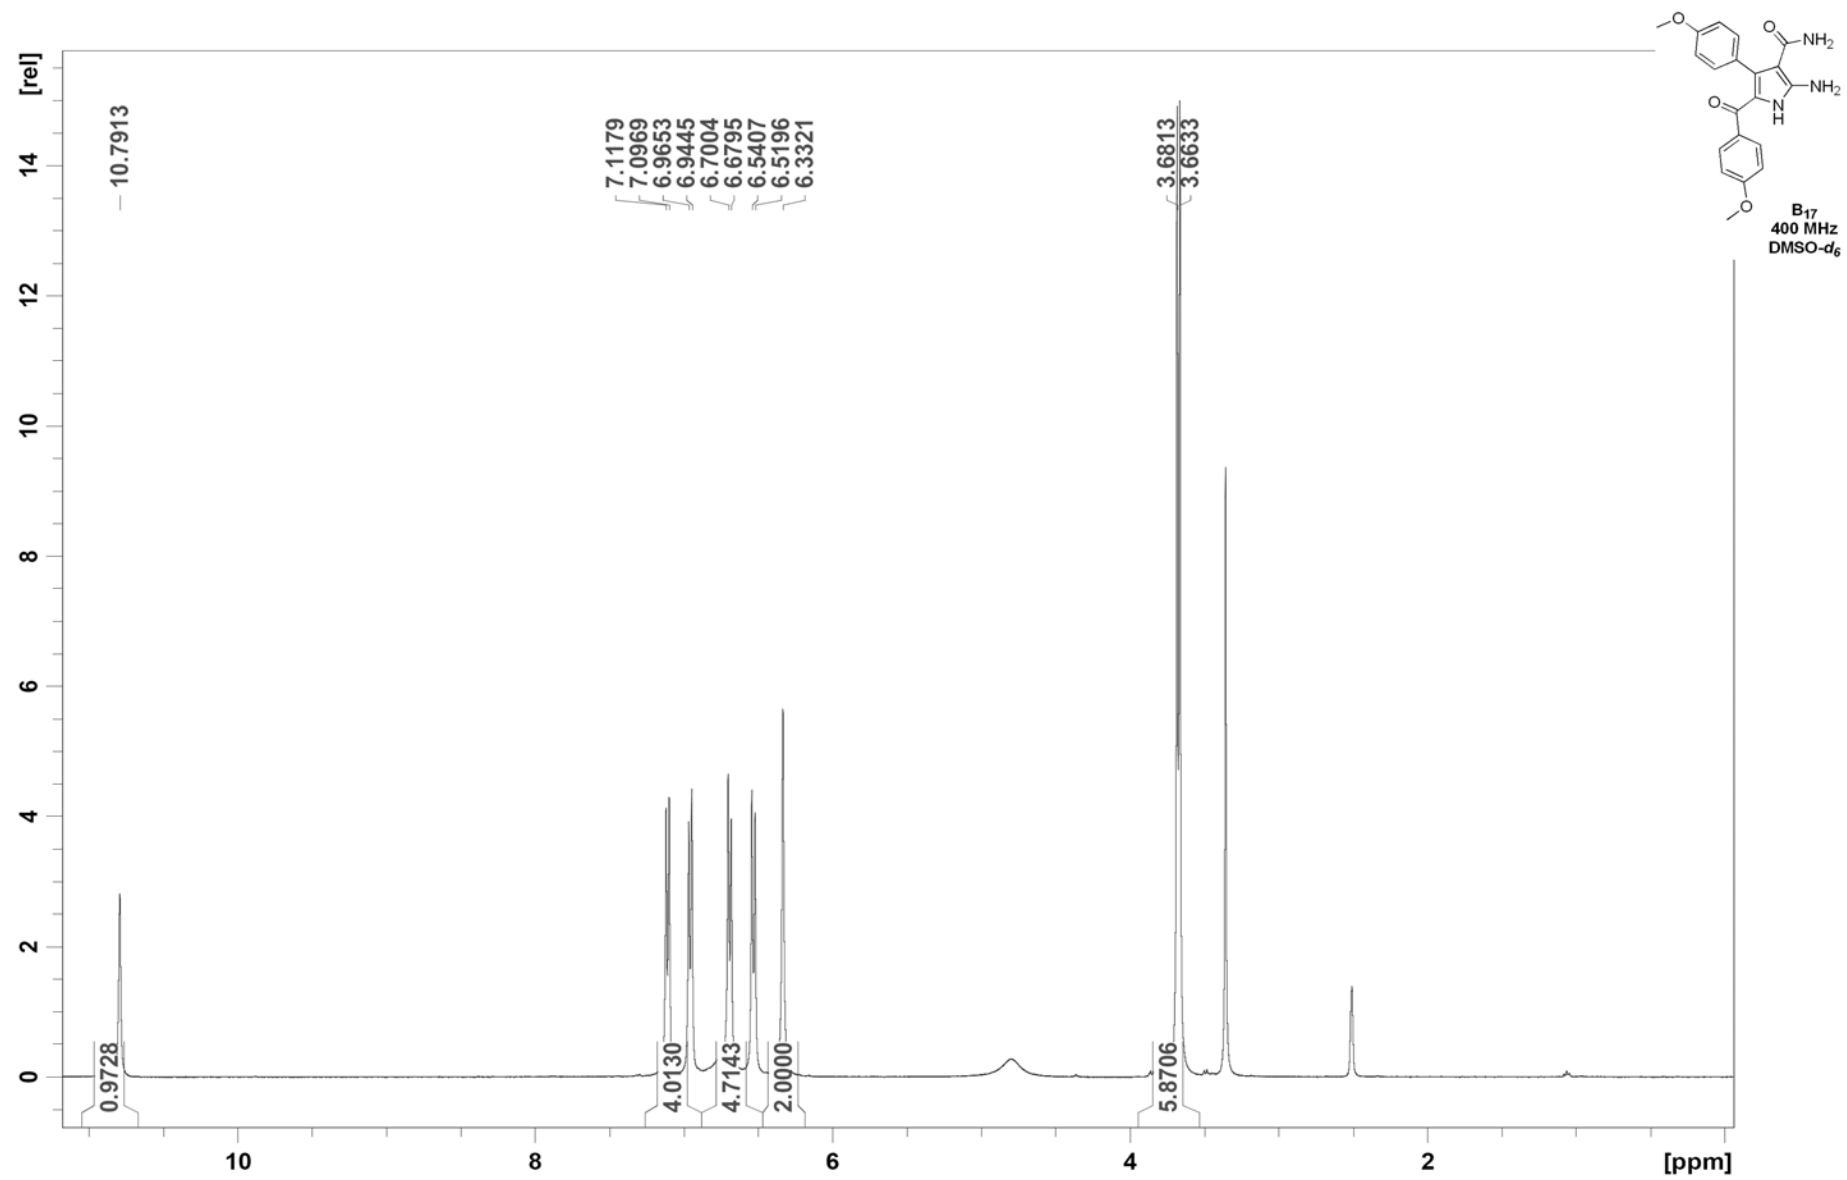



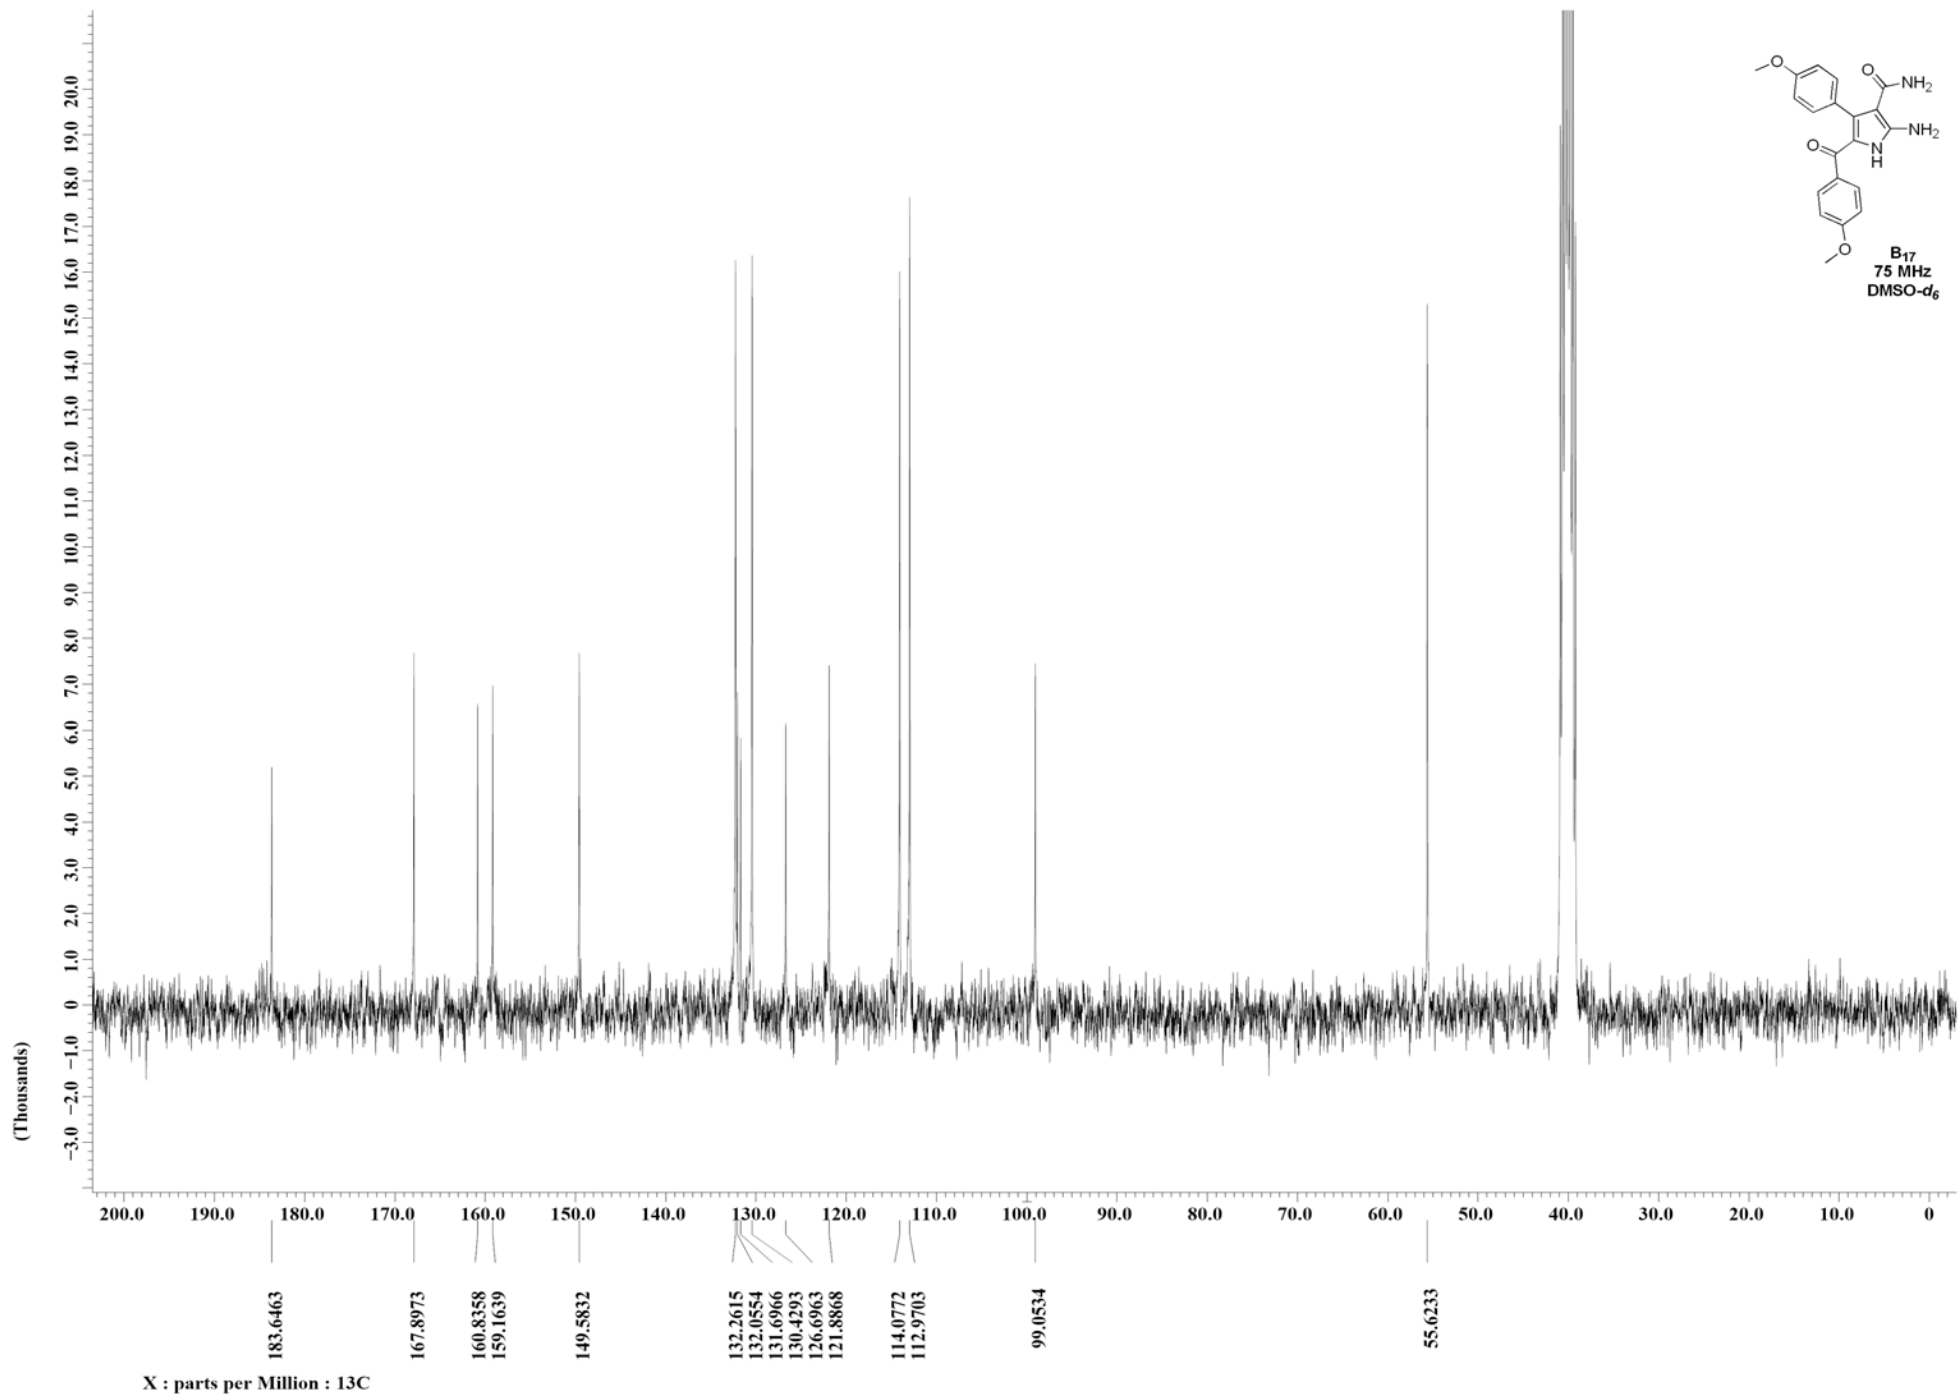

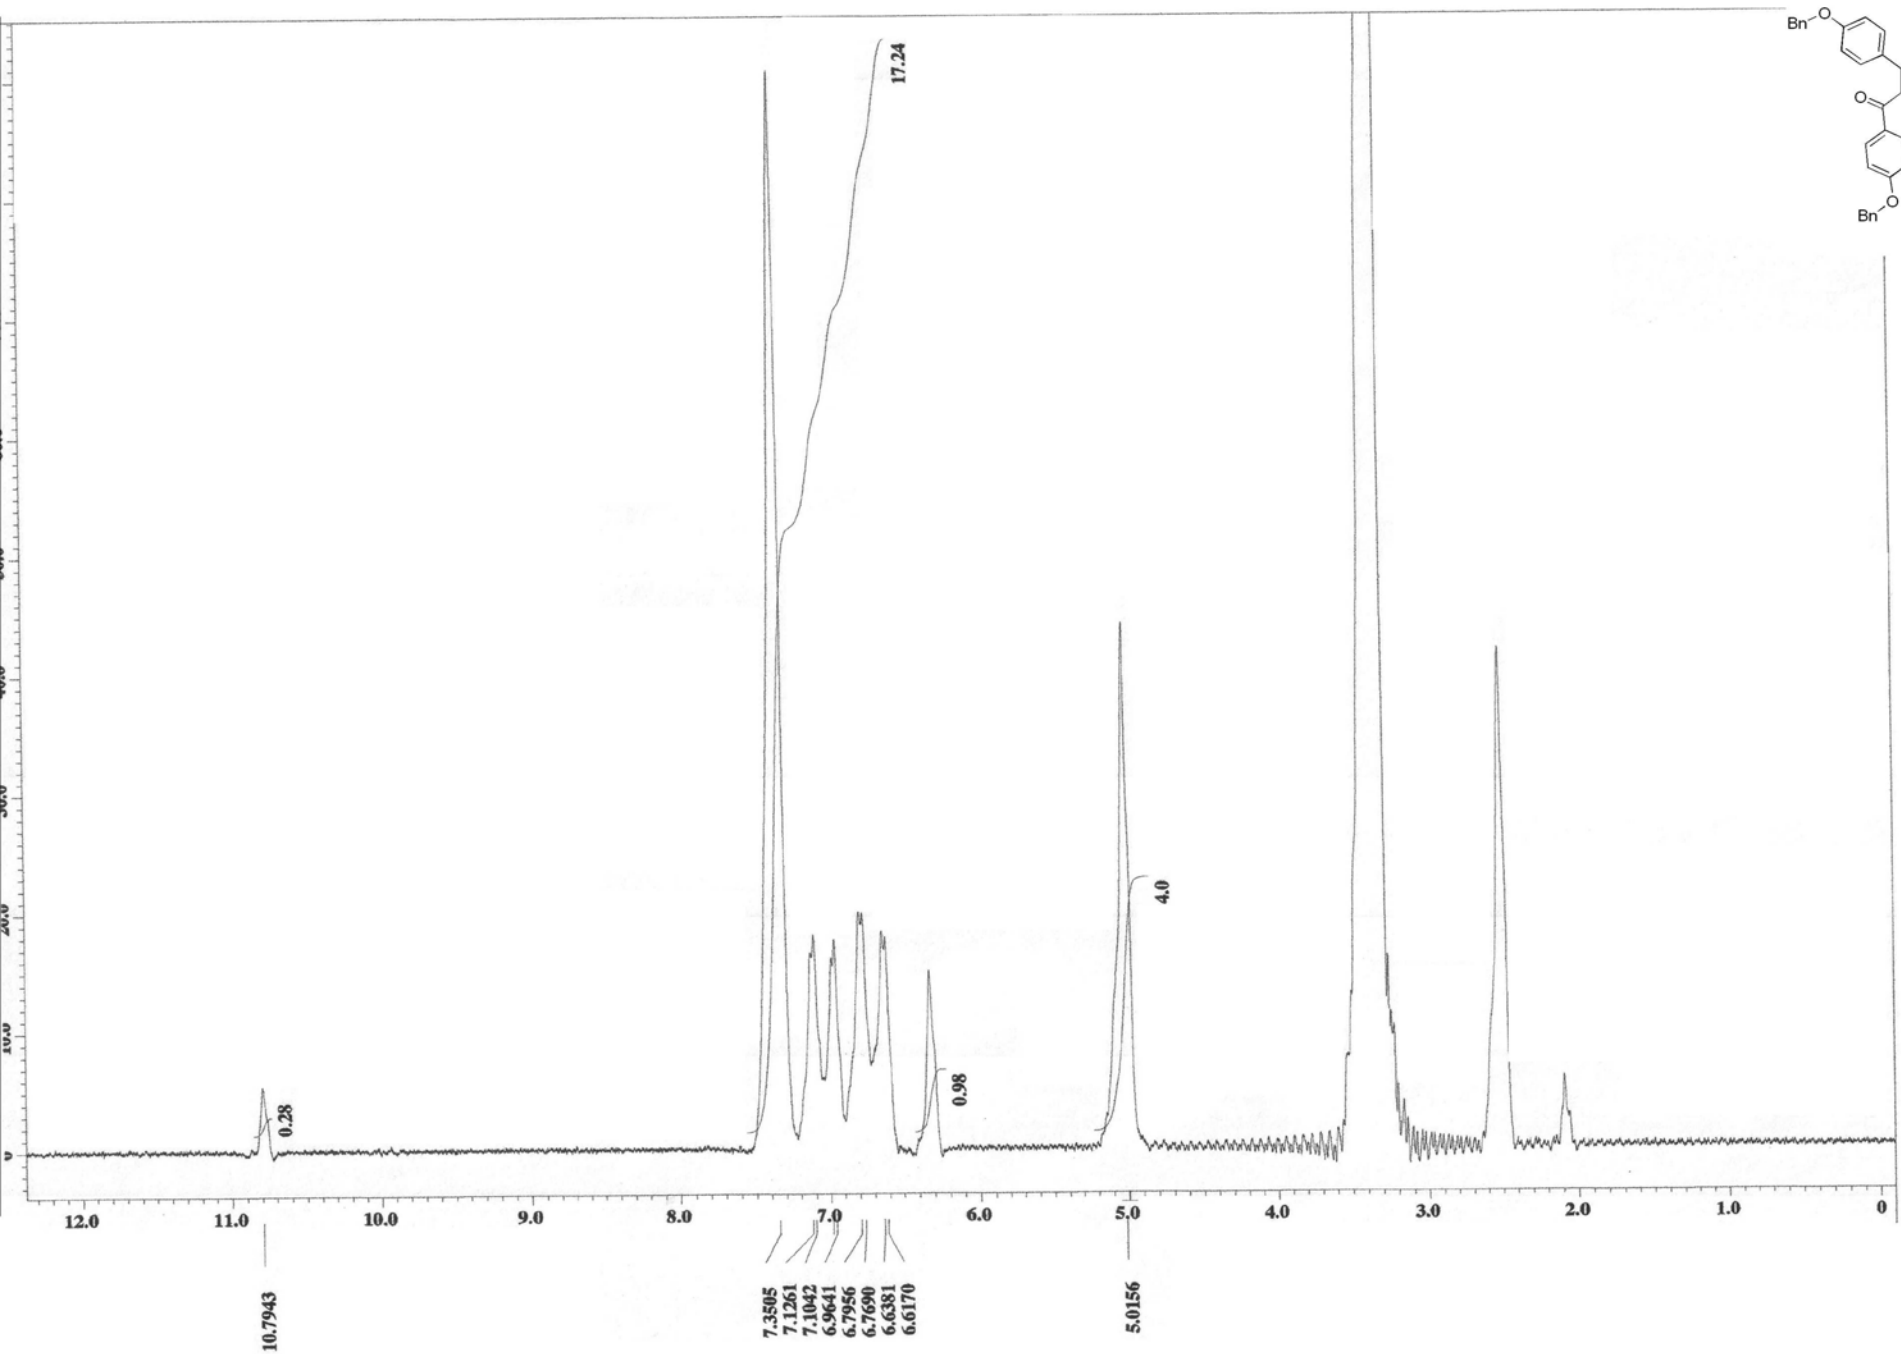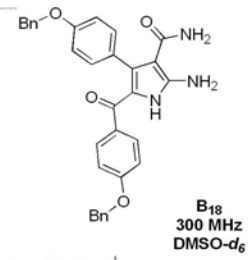

X : parts per Million : 1H

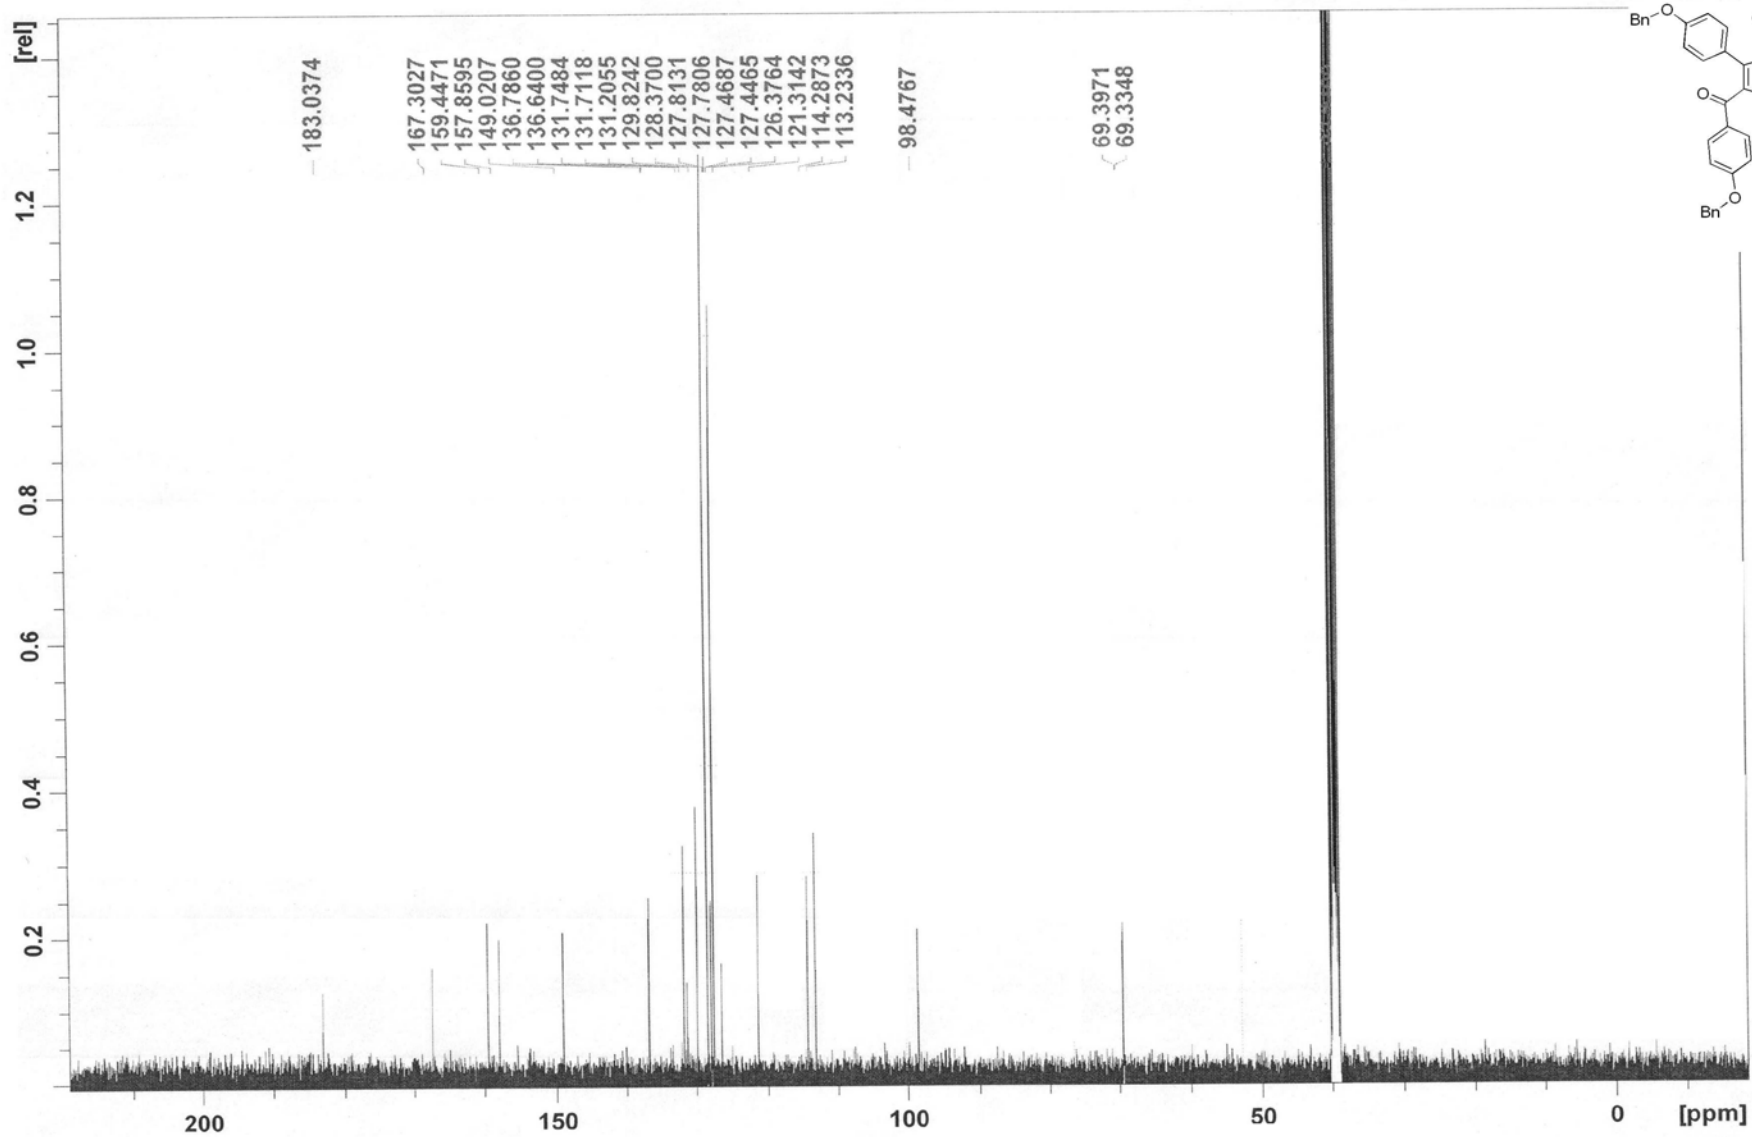

B<sub>18</sub>  
100 MHz  
DMSO-d<sub>6</sub>

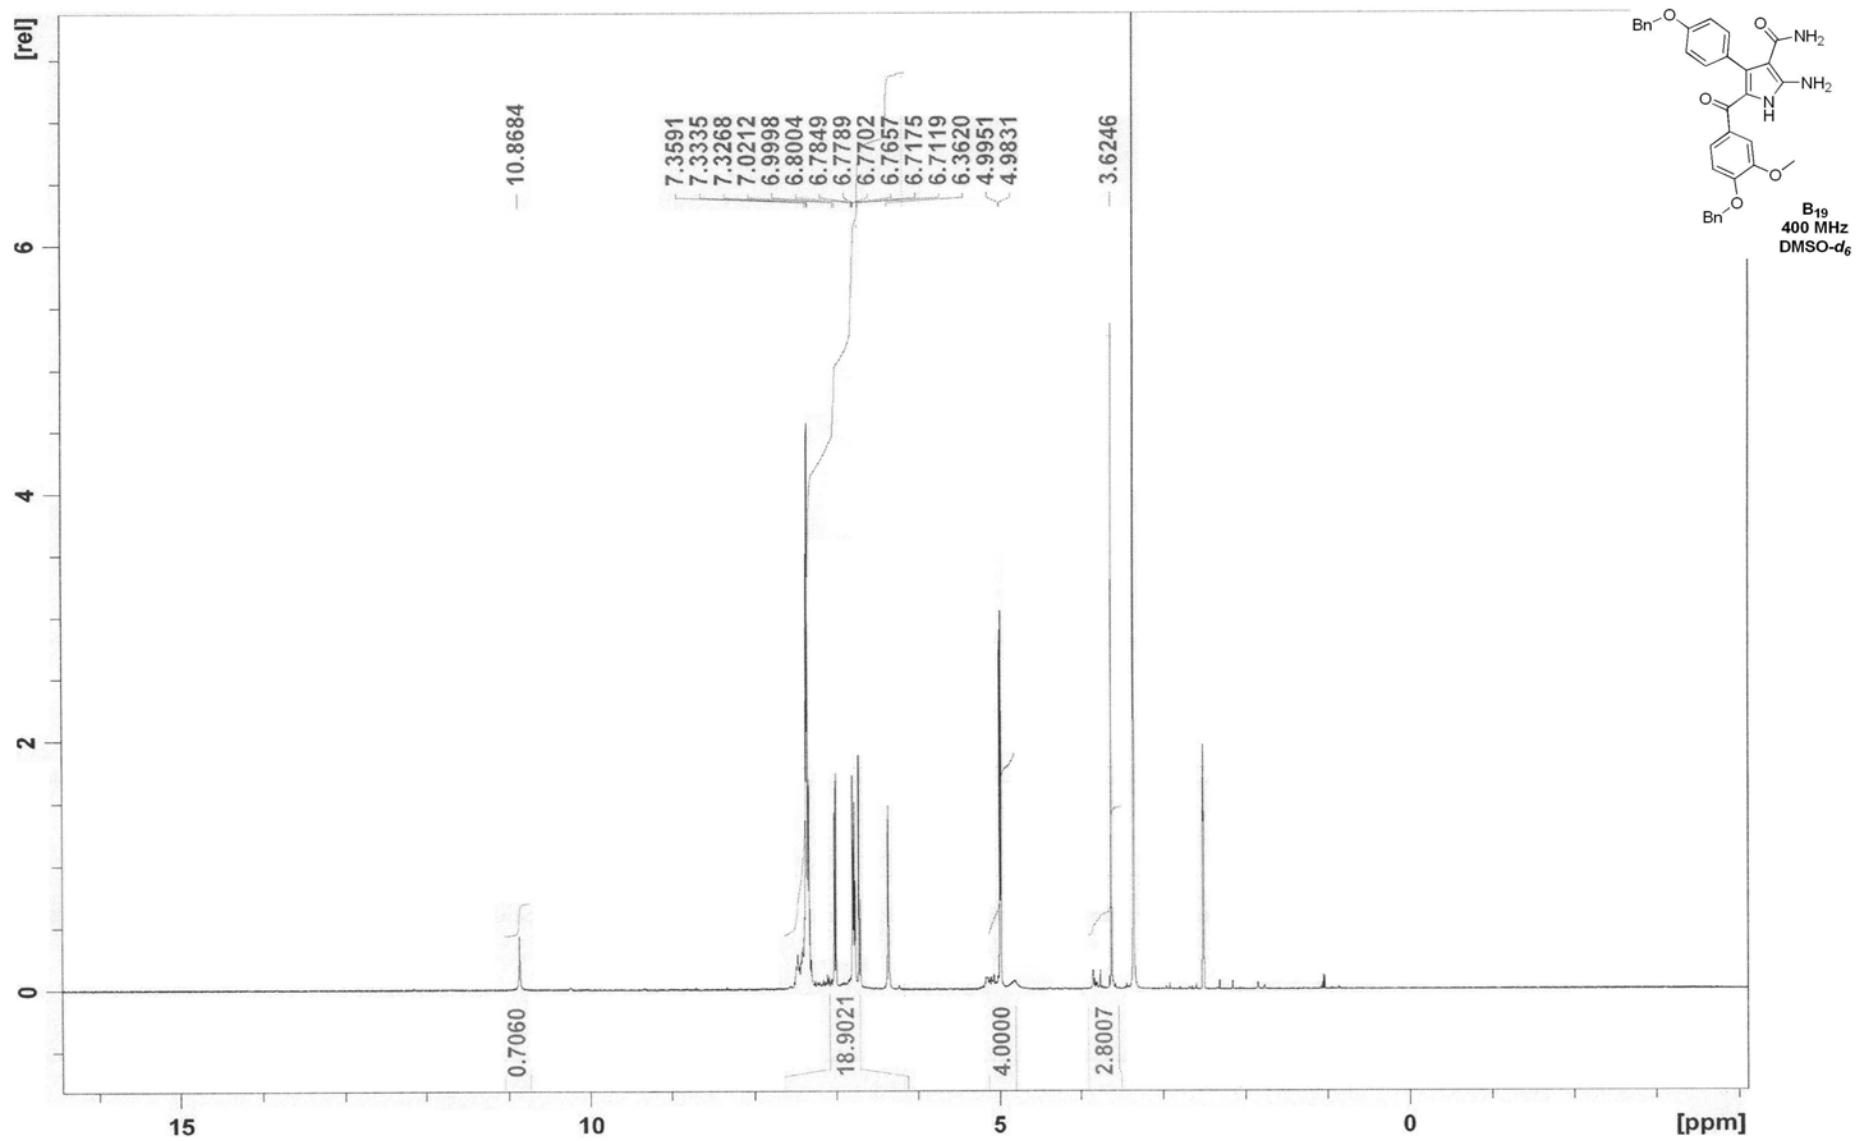



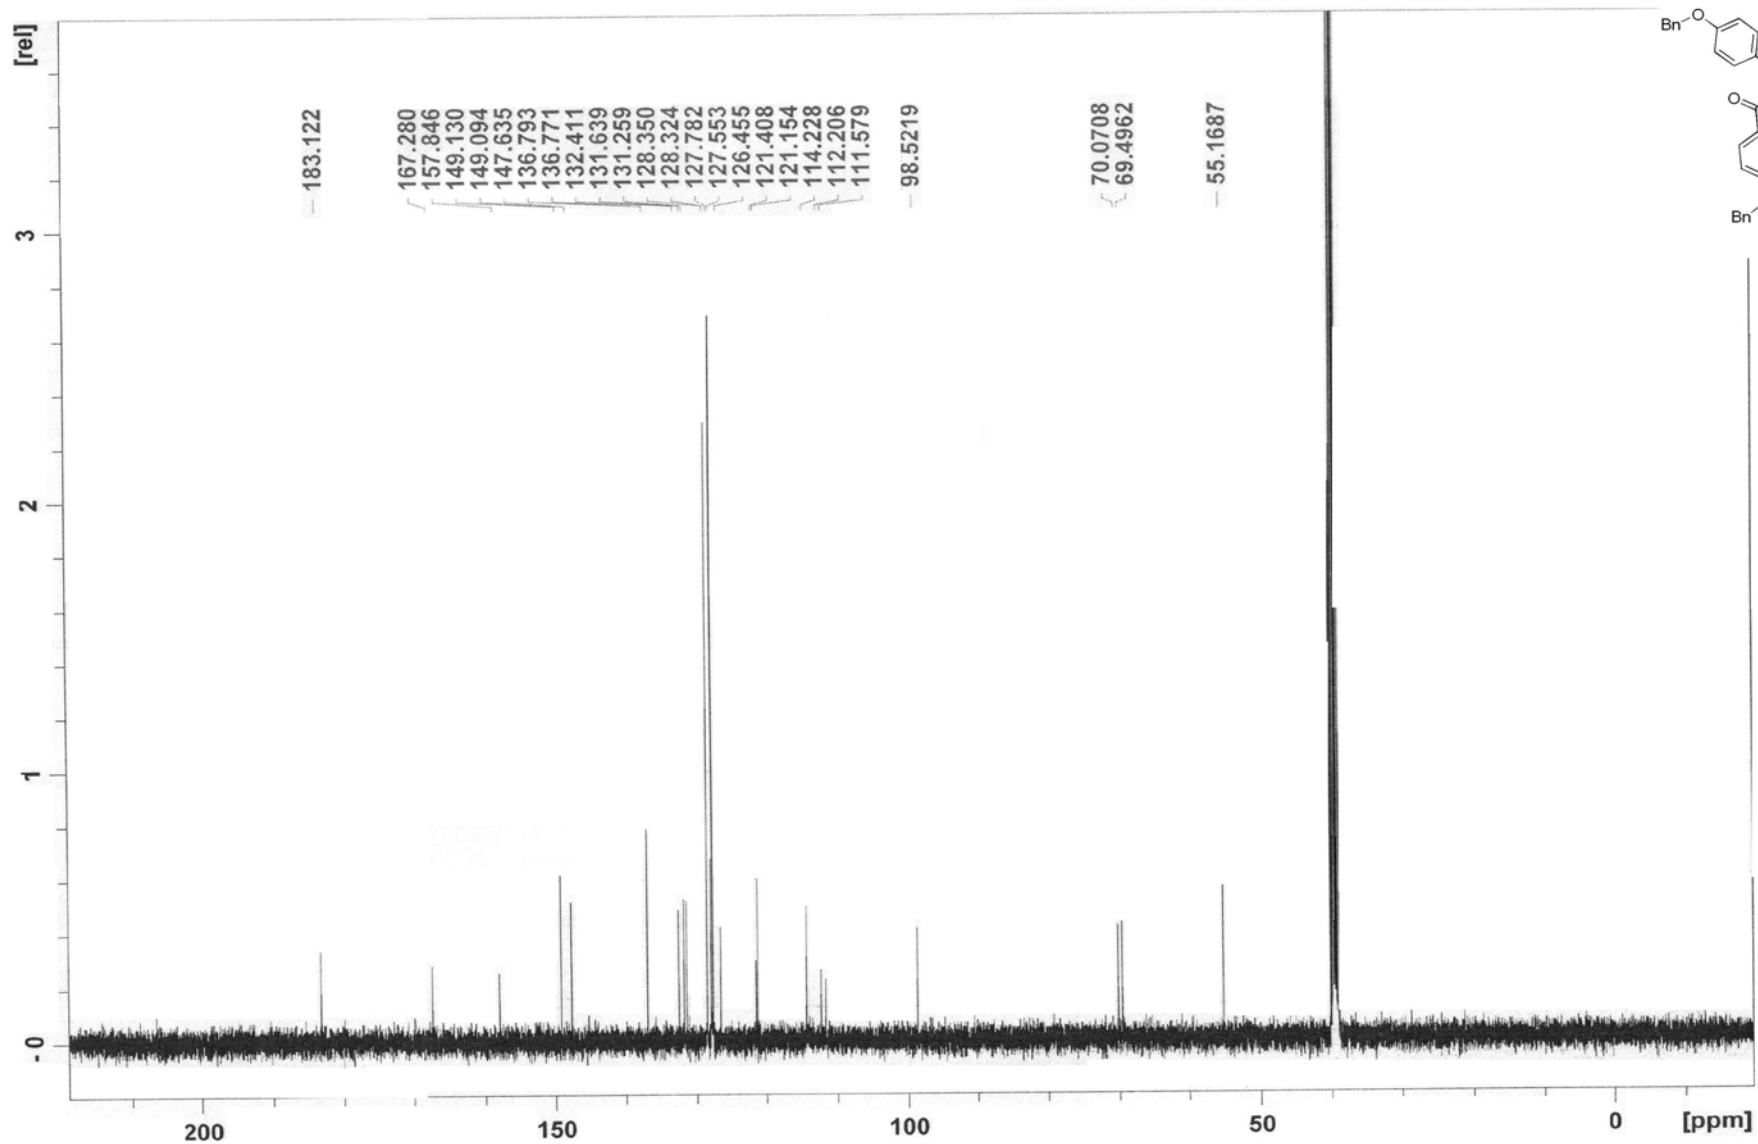

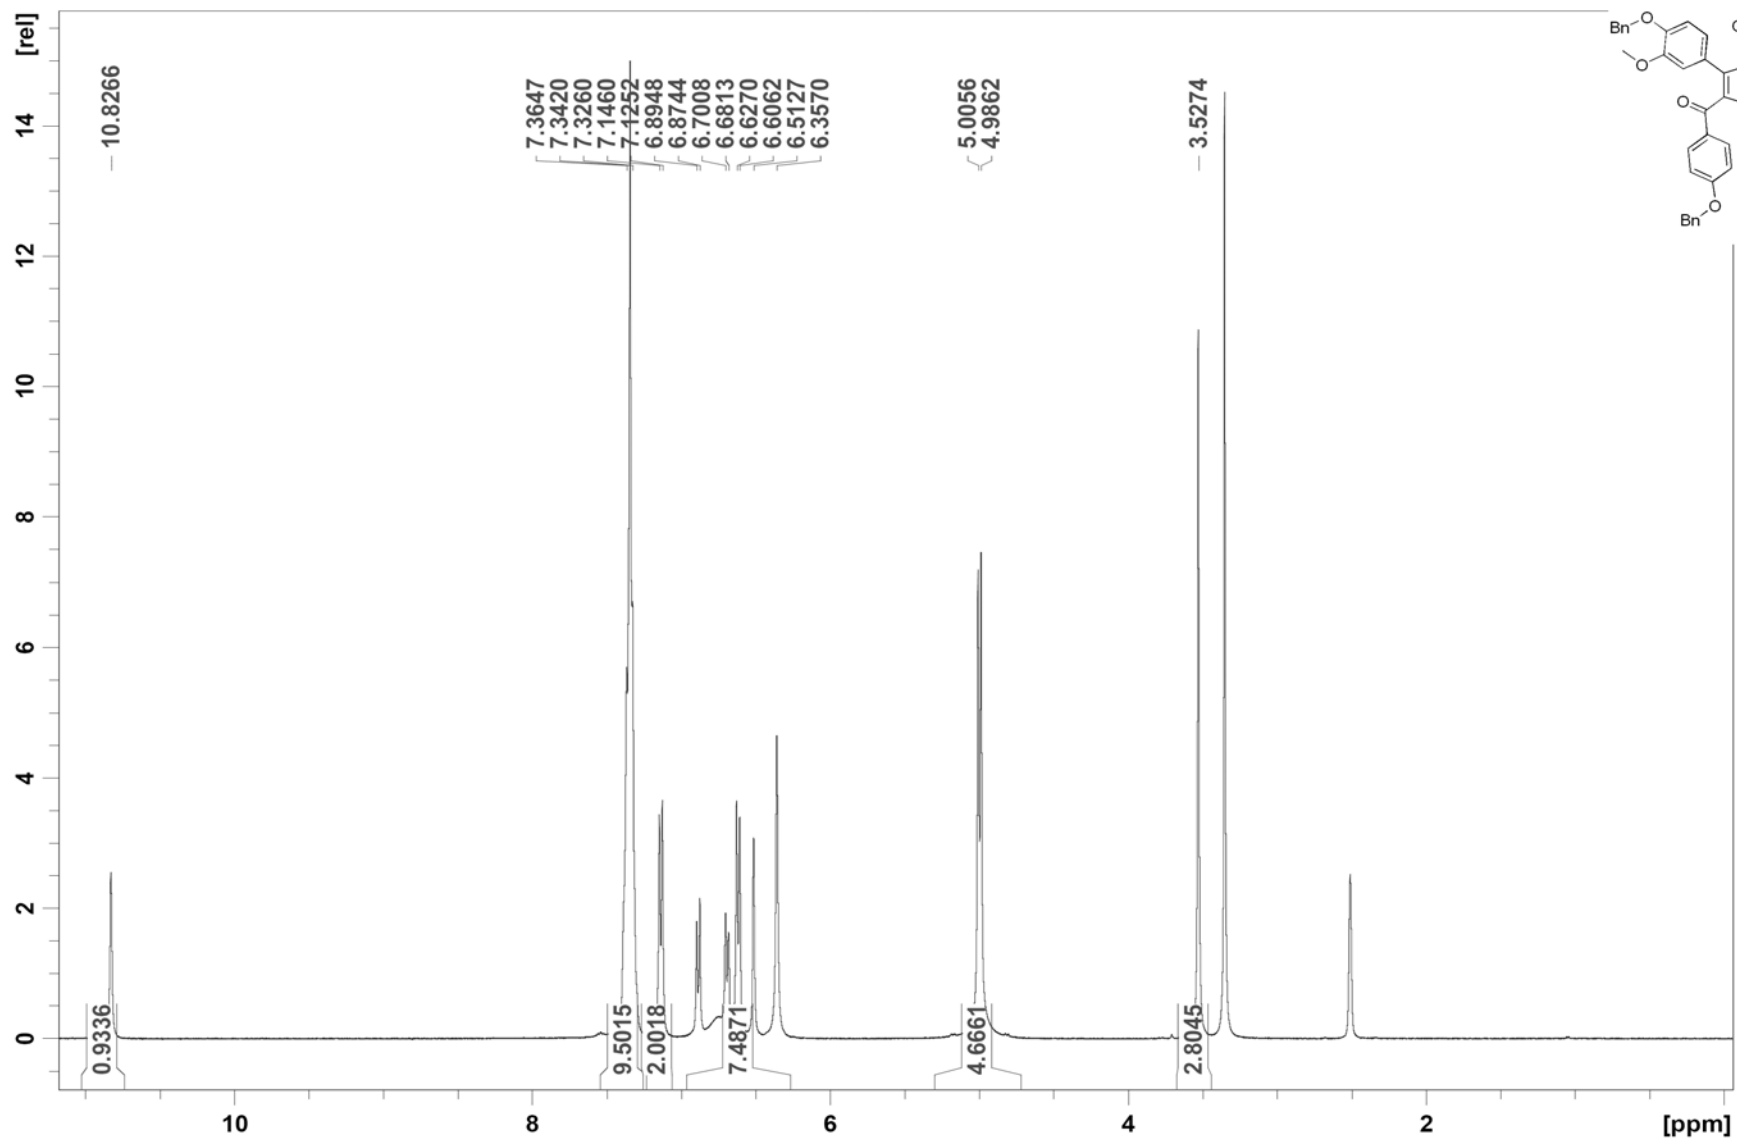

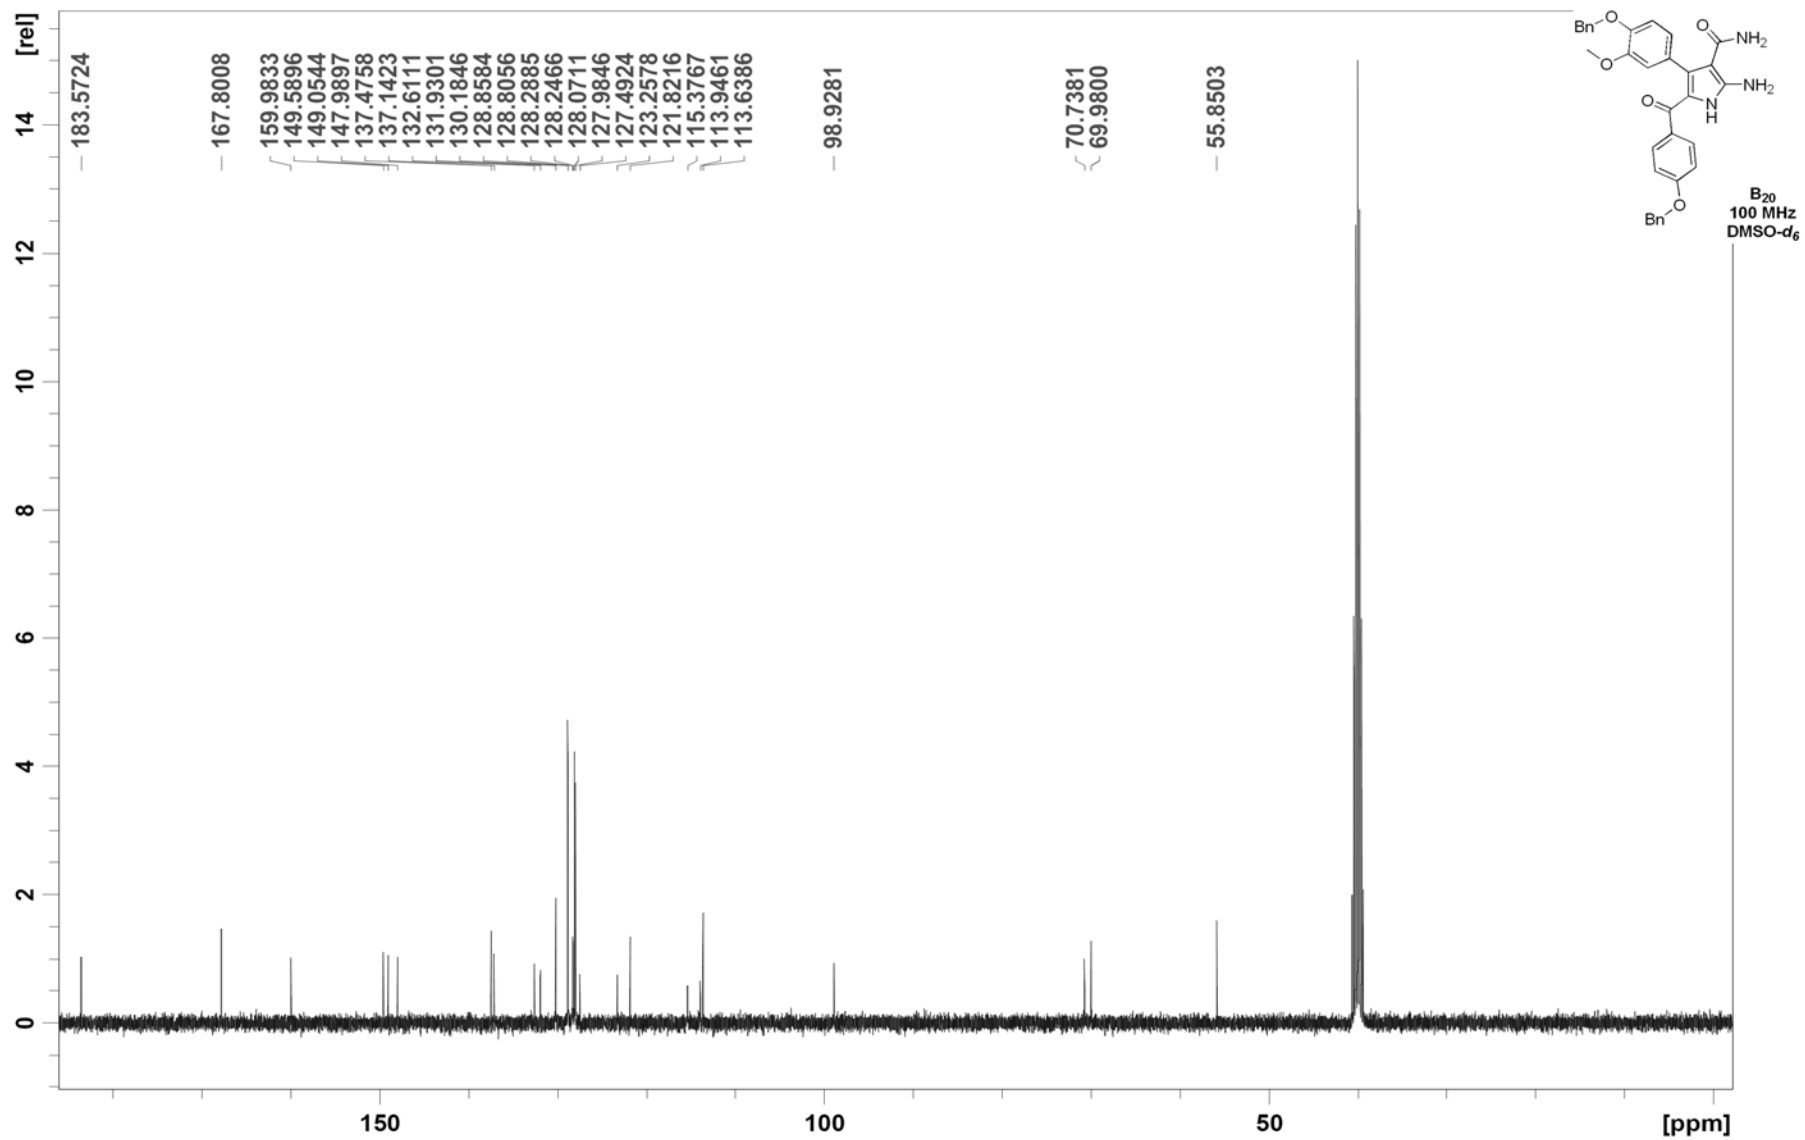

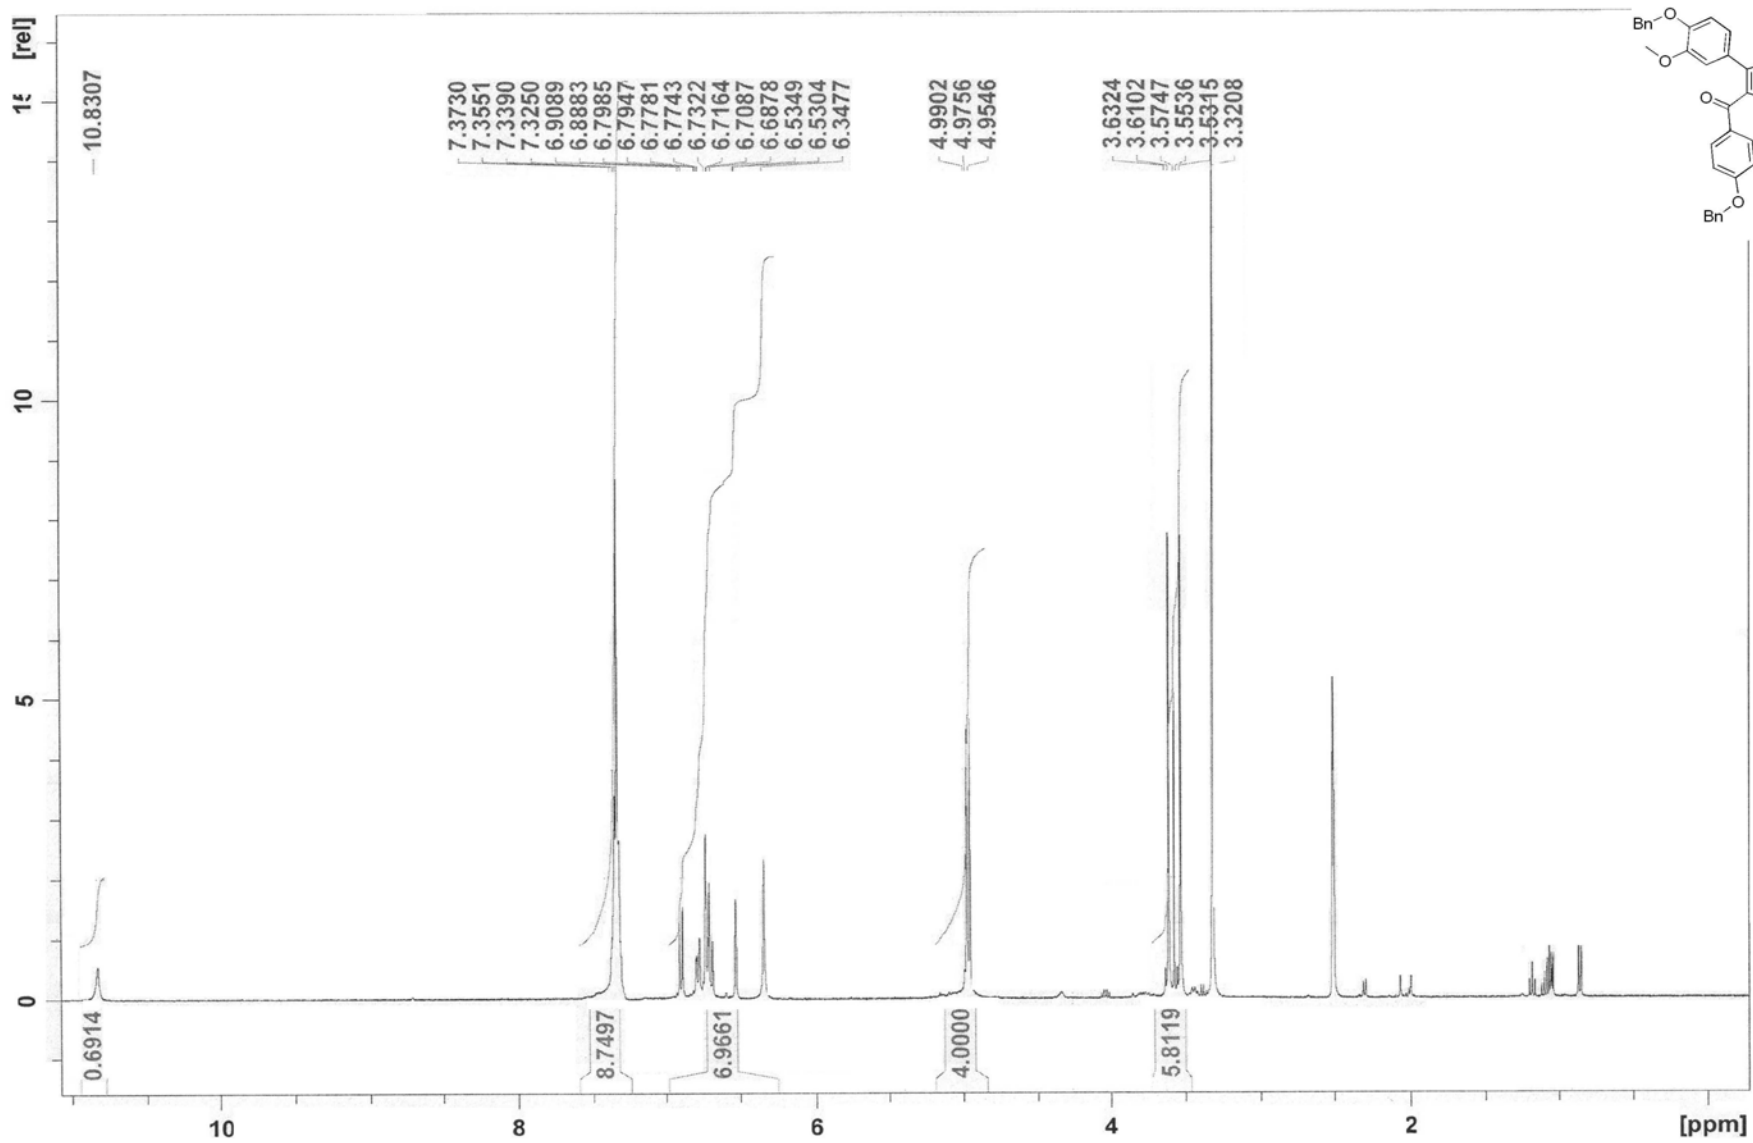



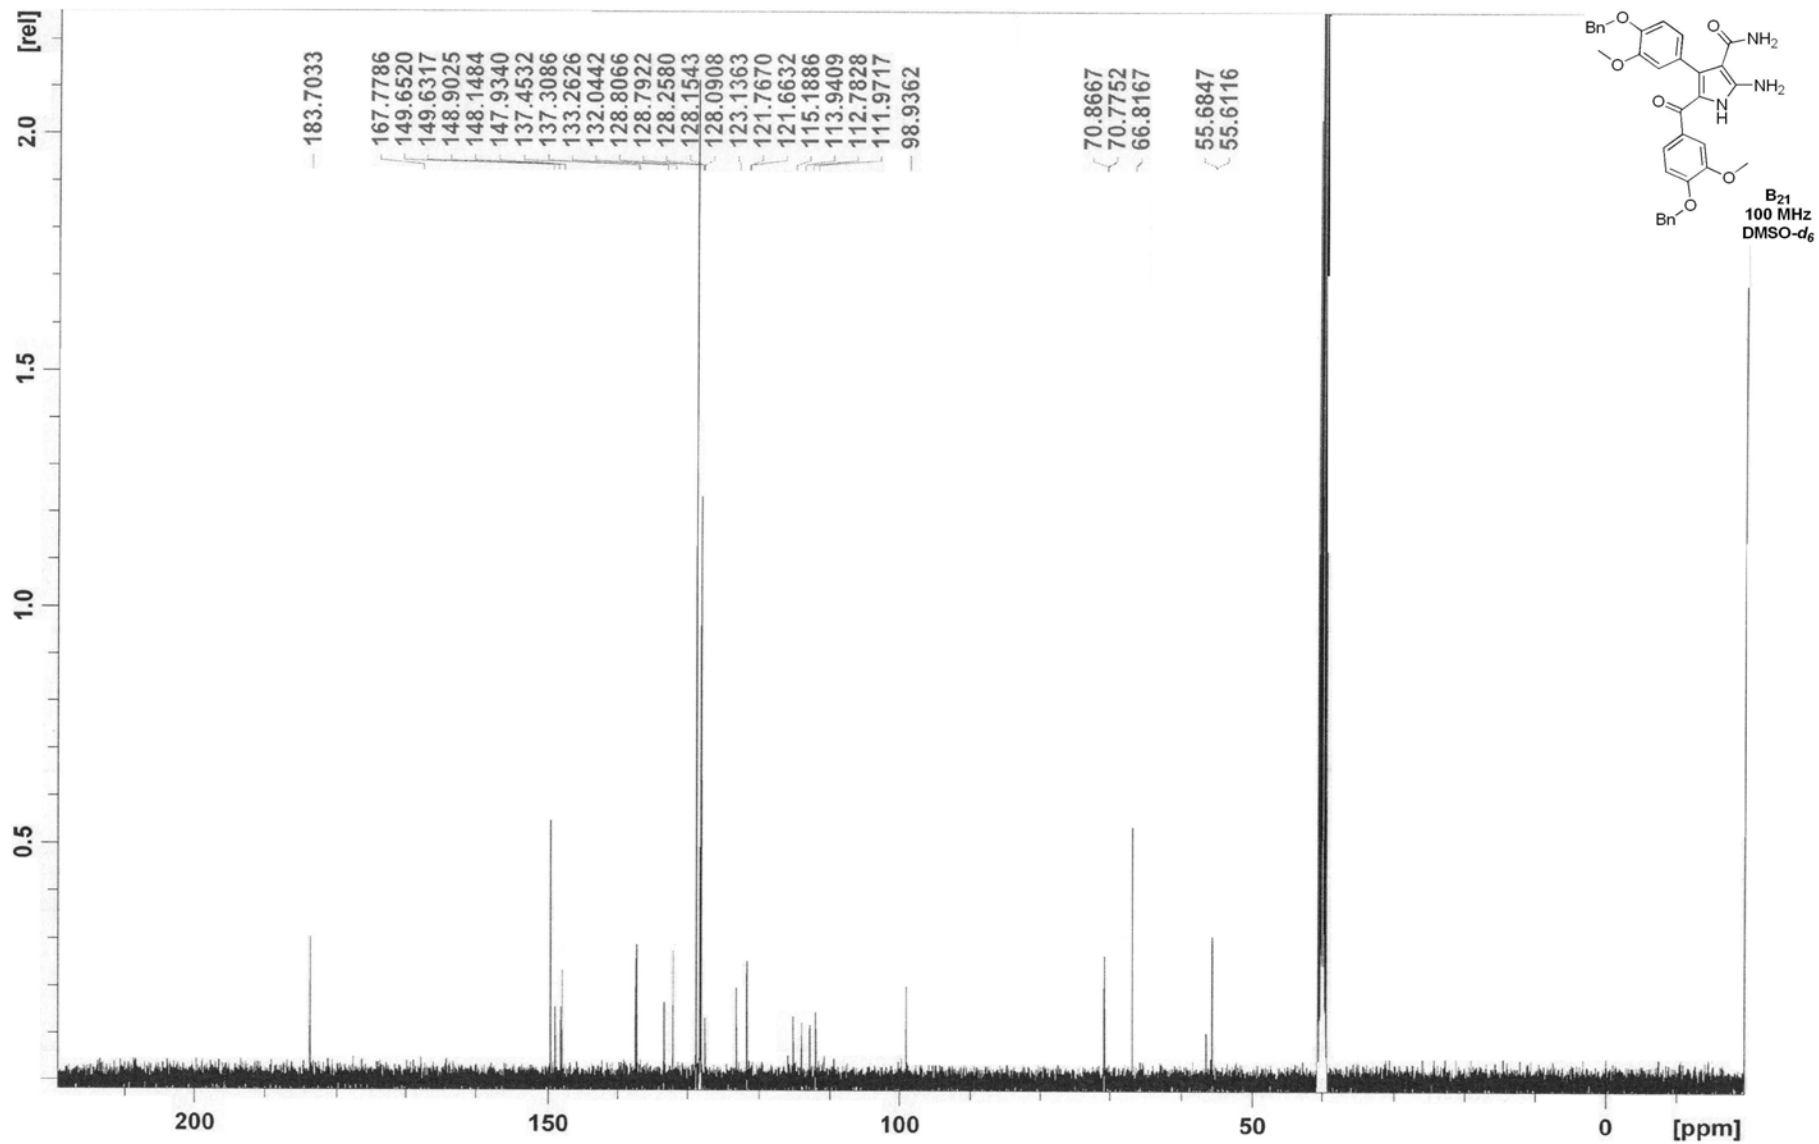

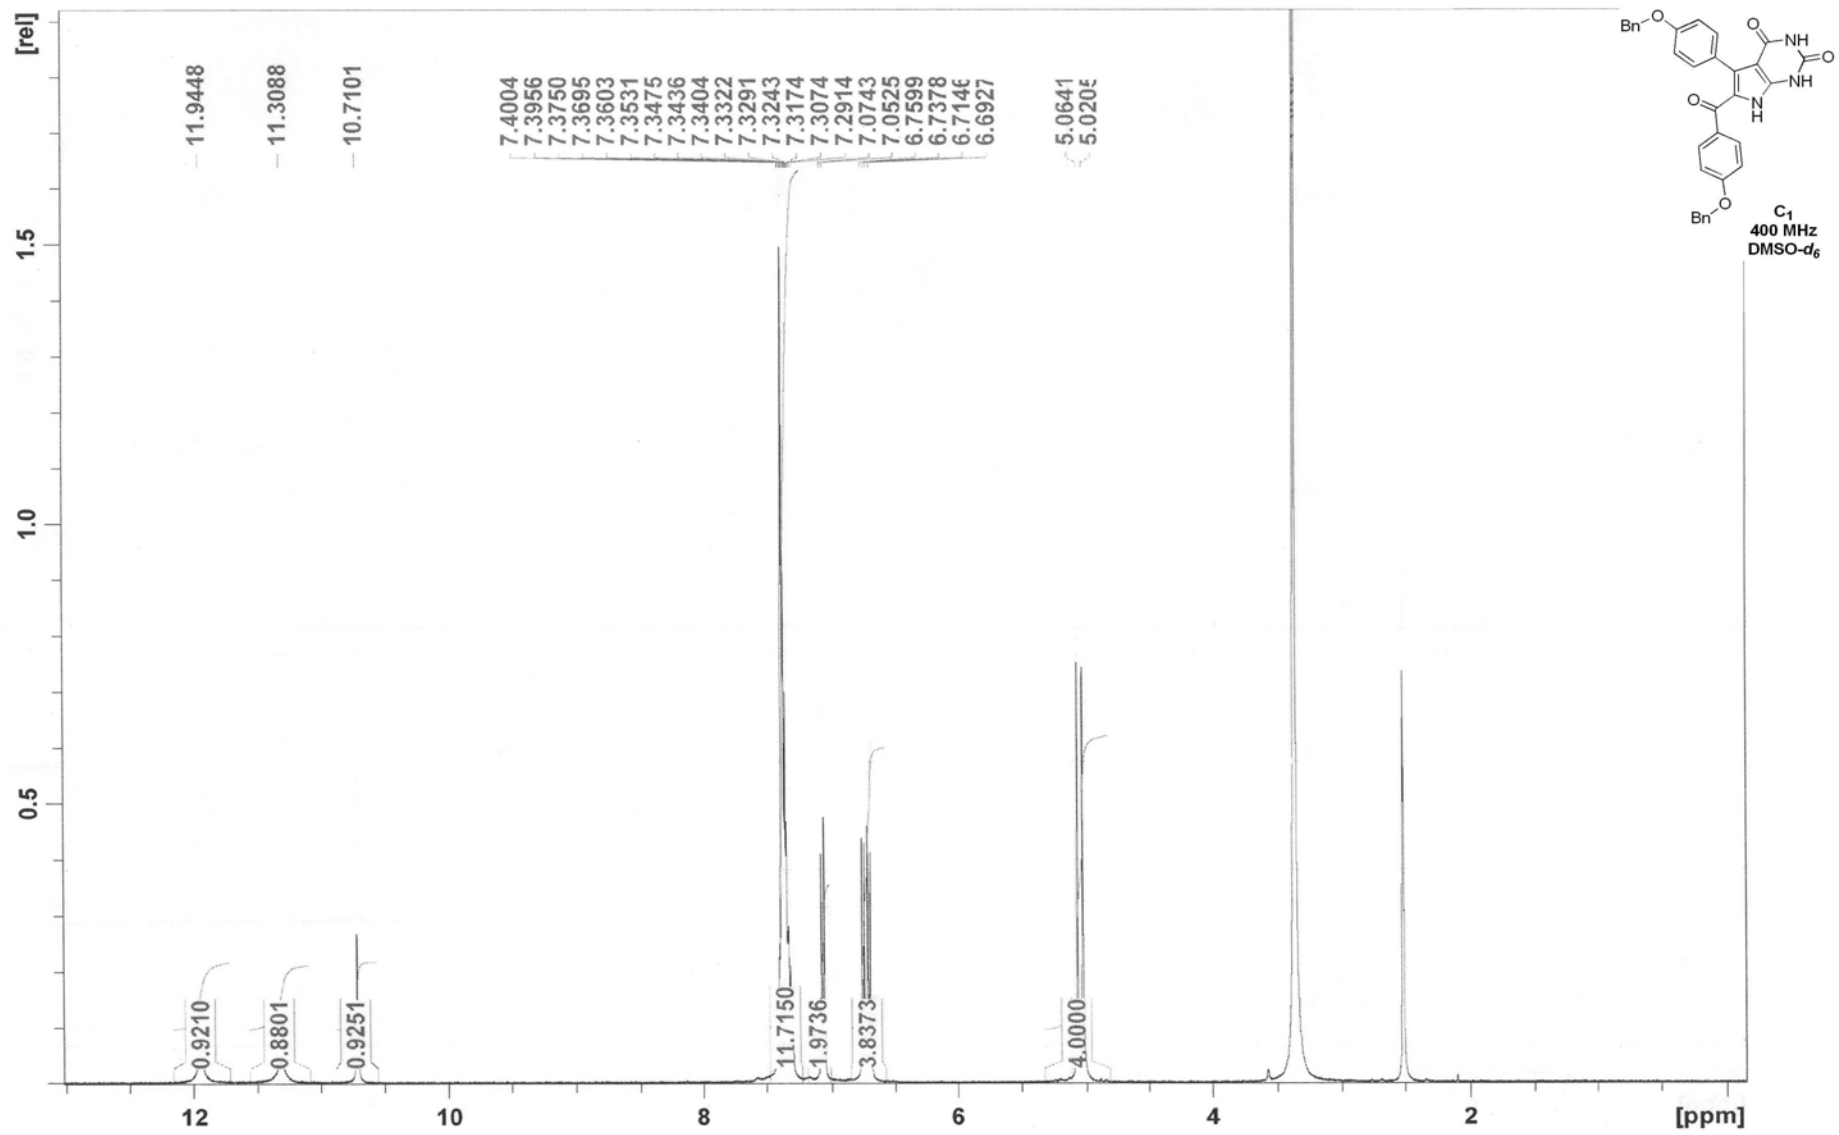

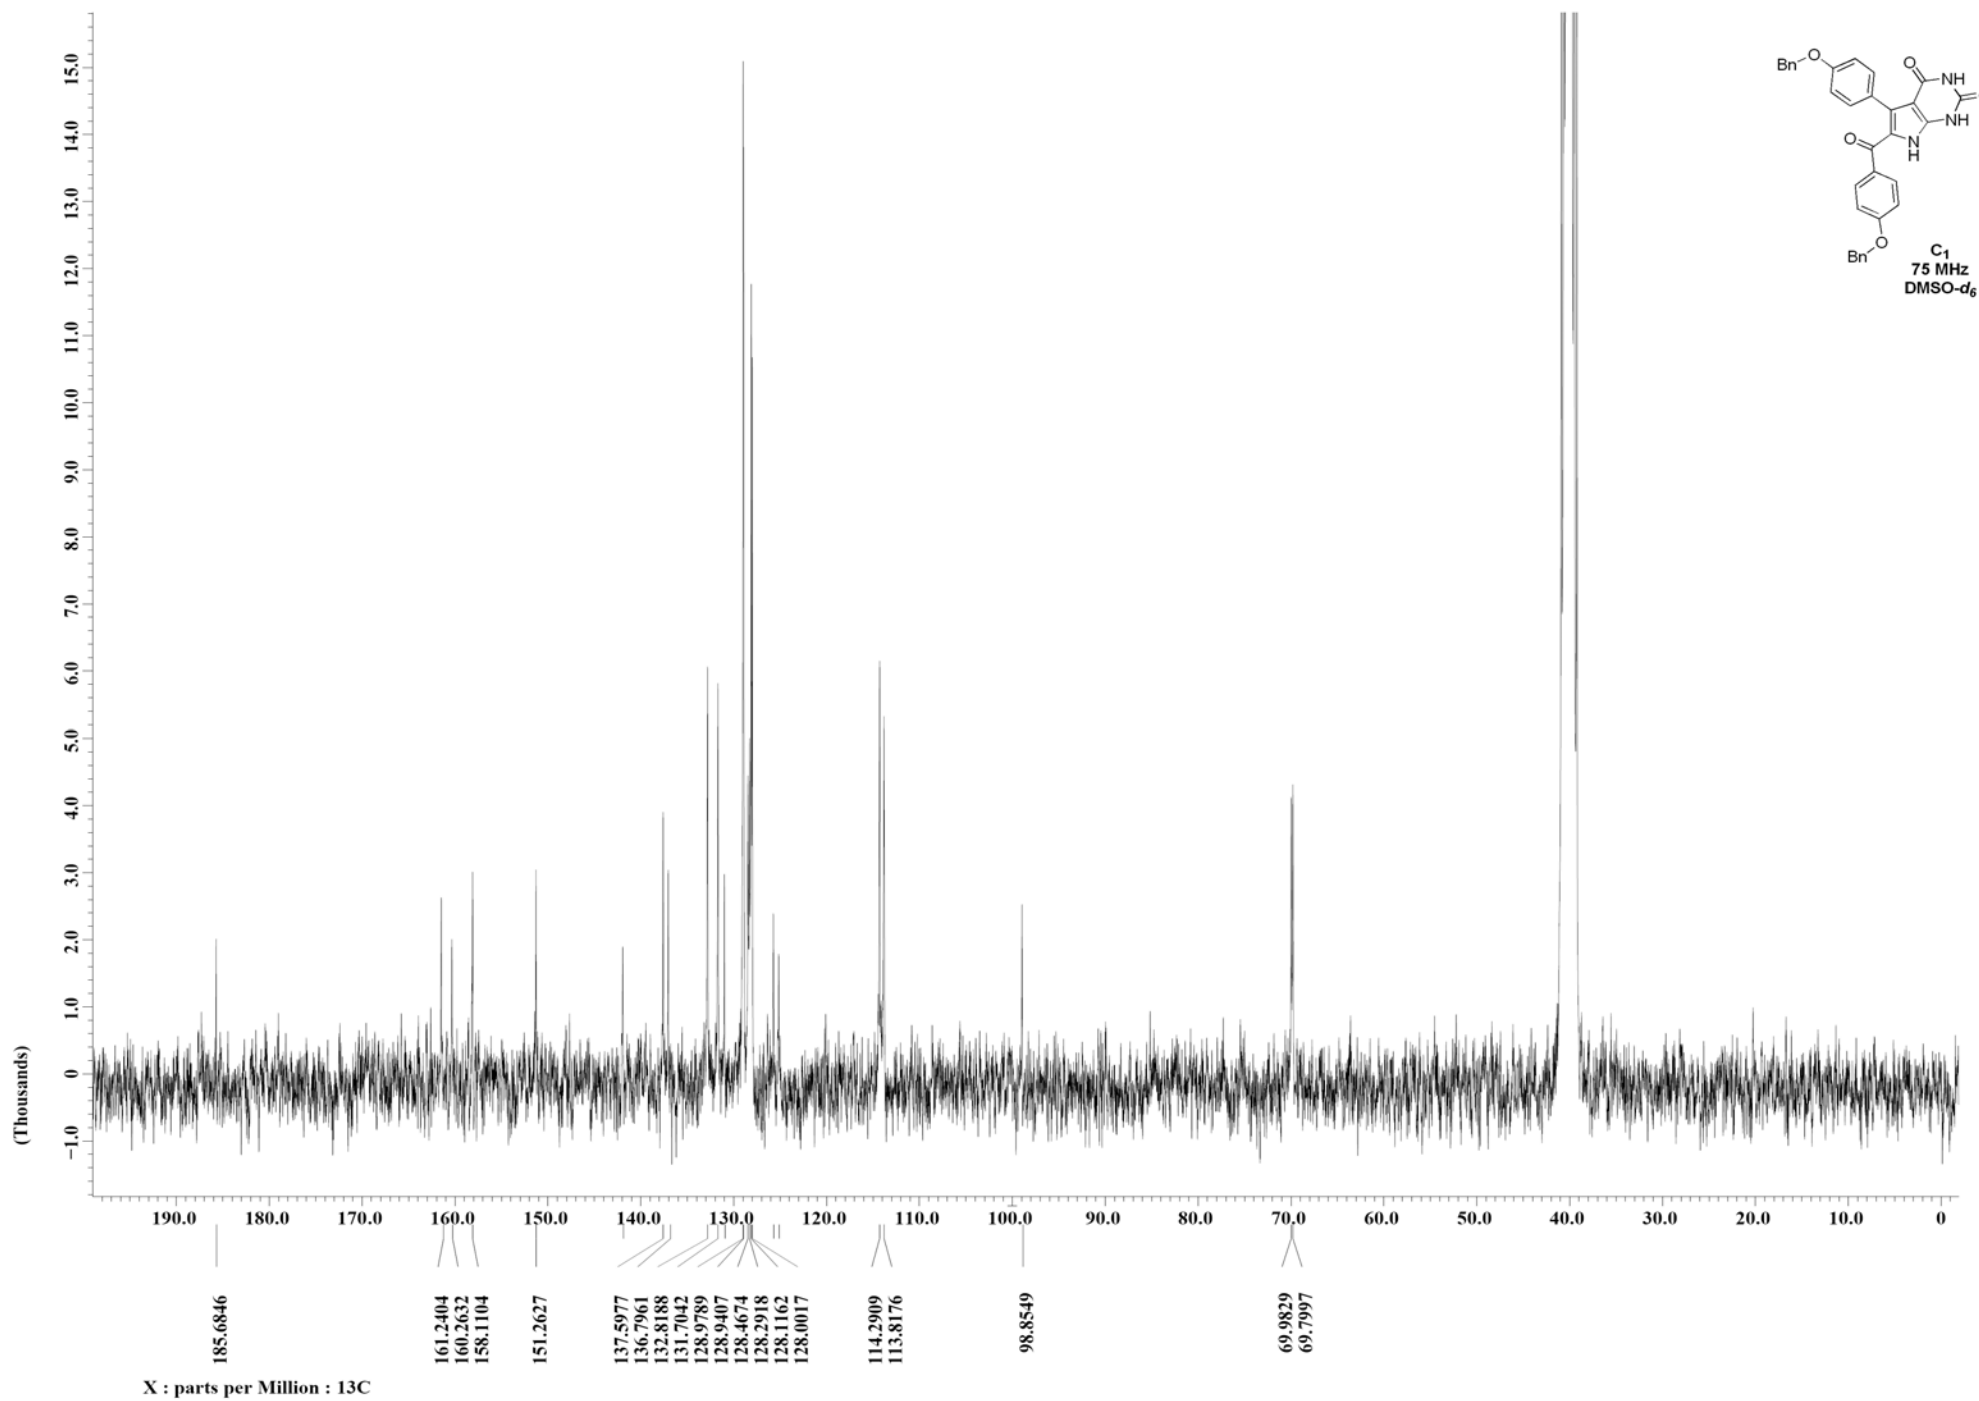

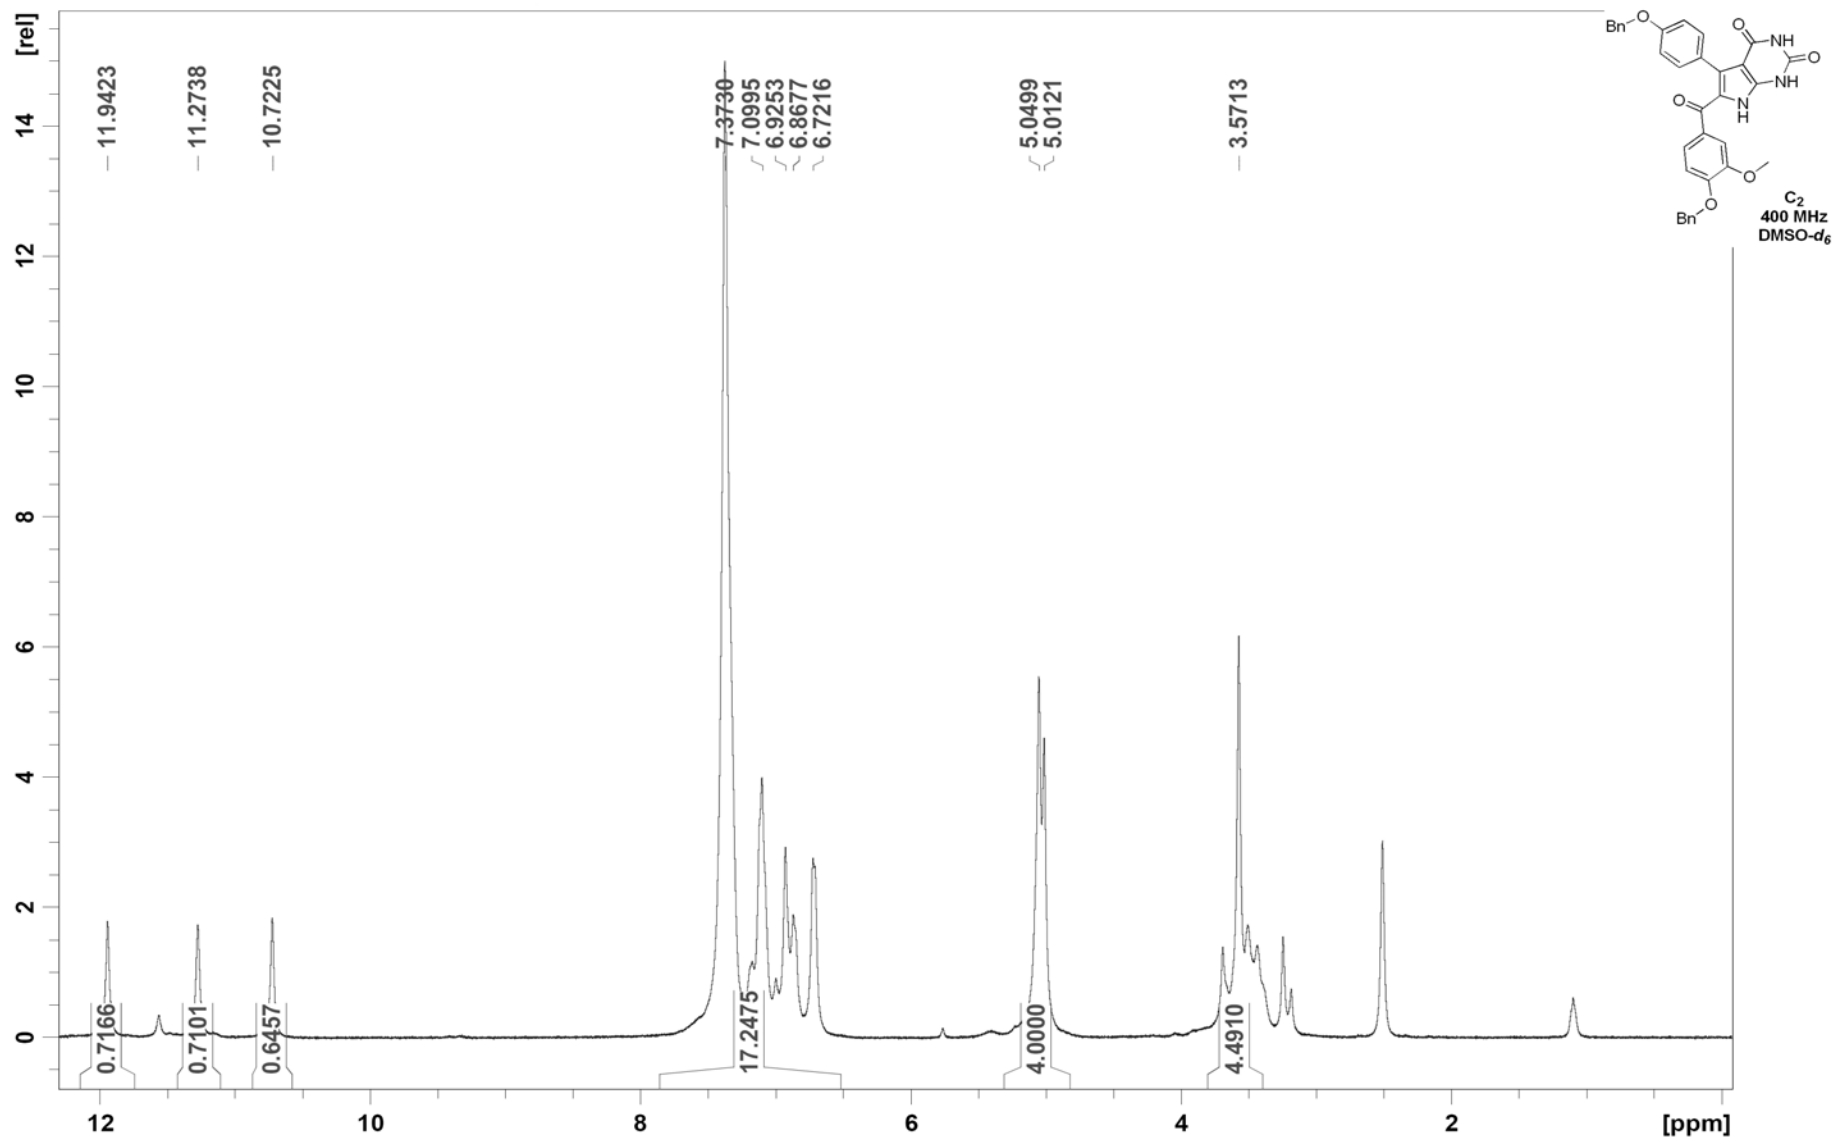



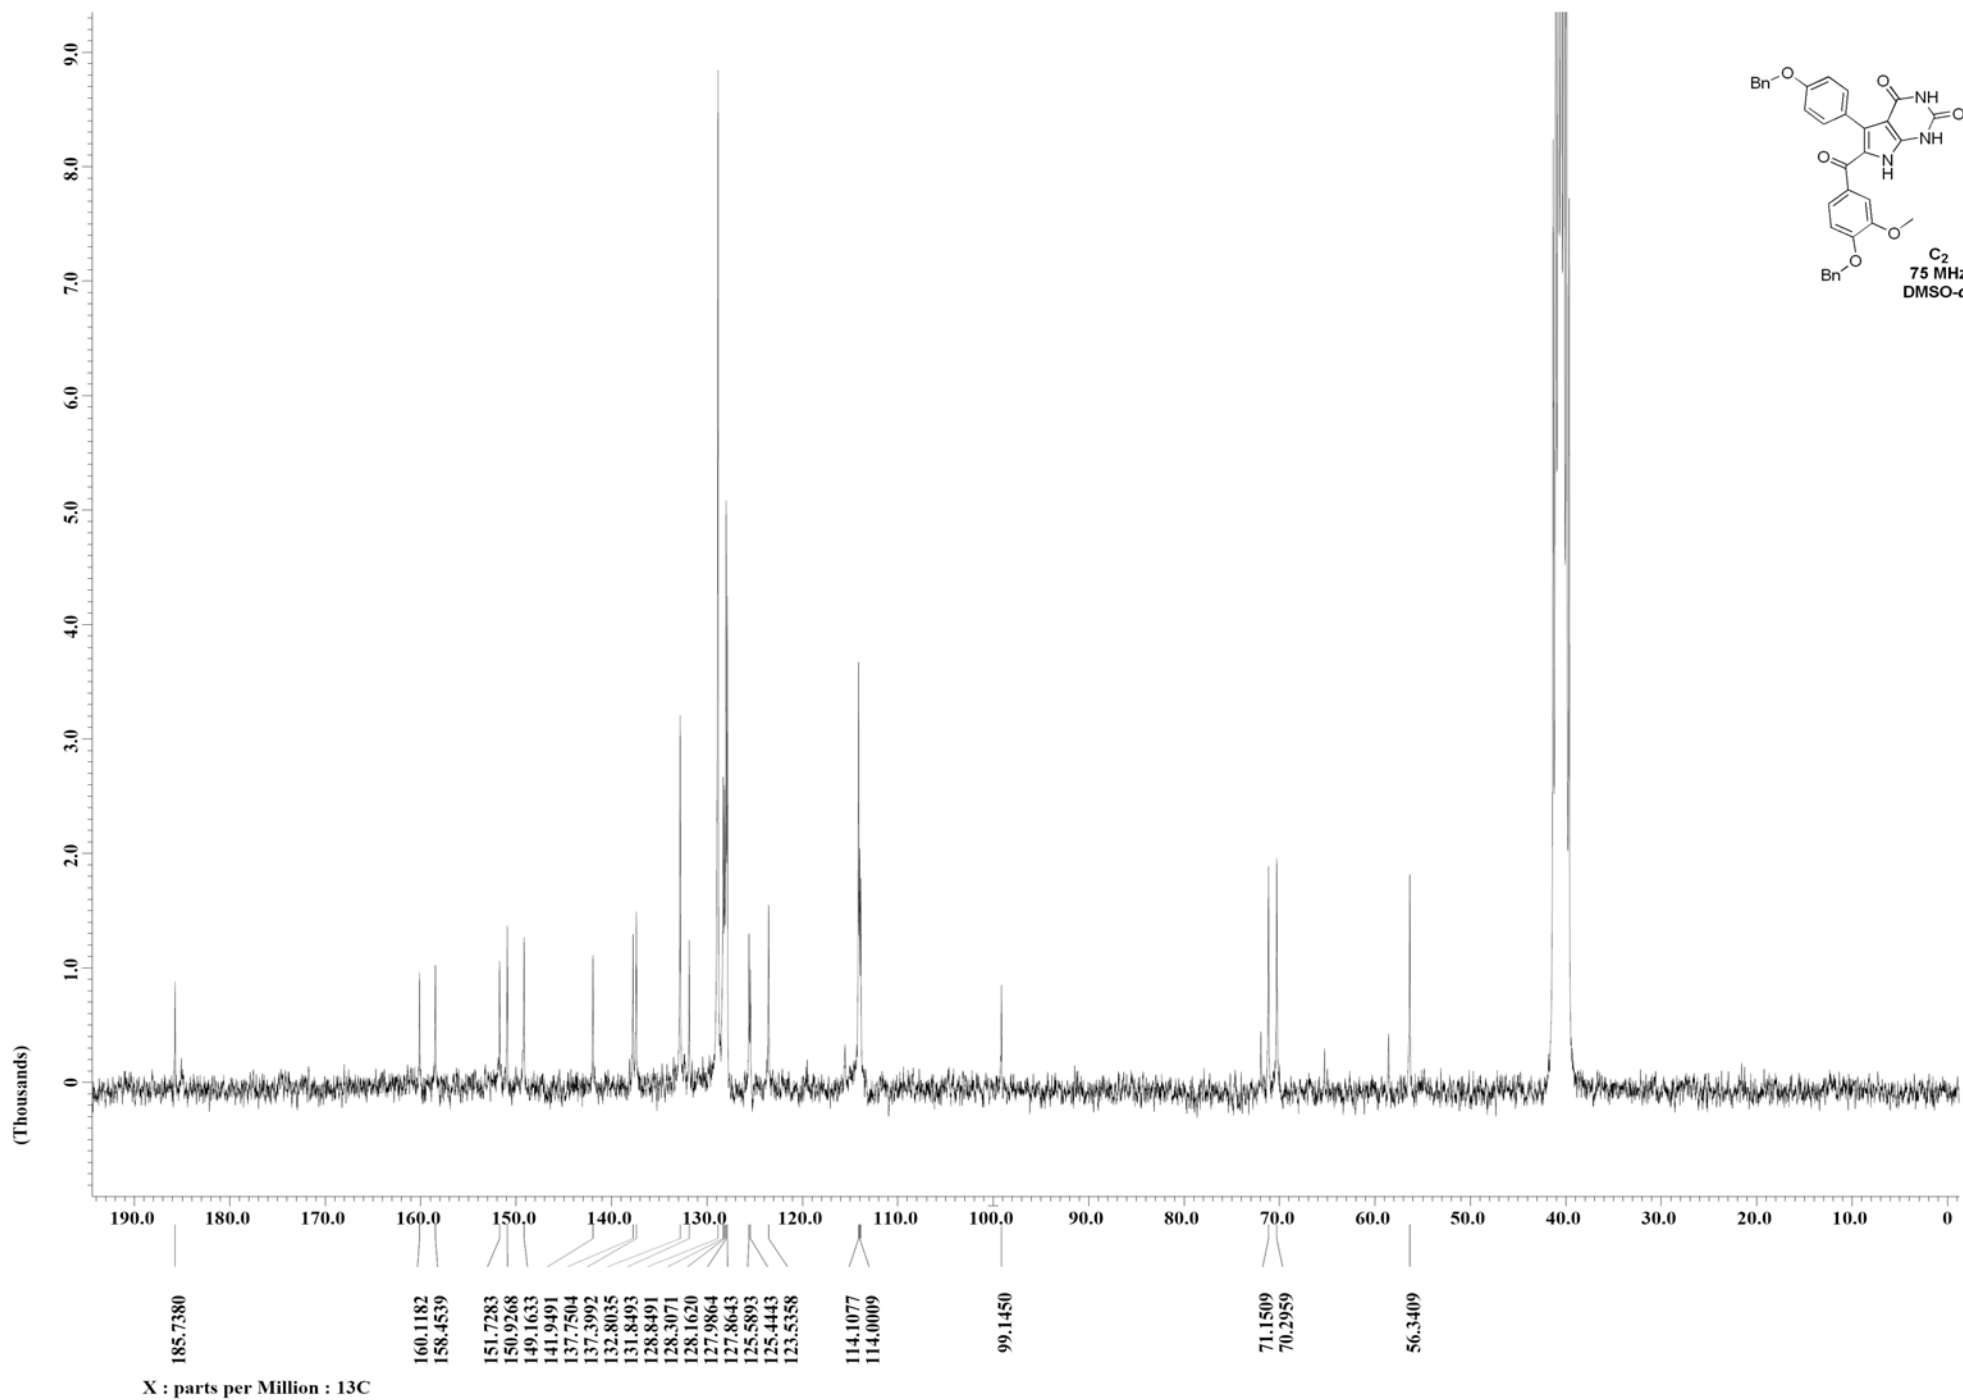

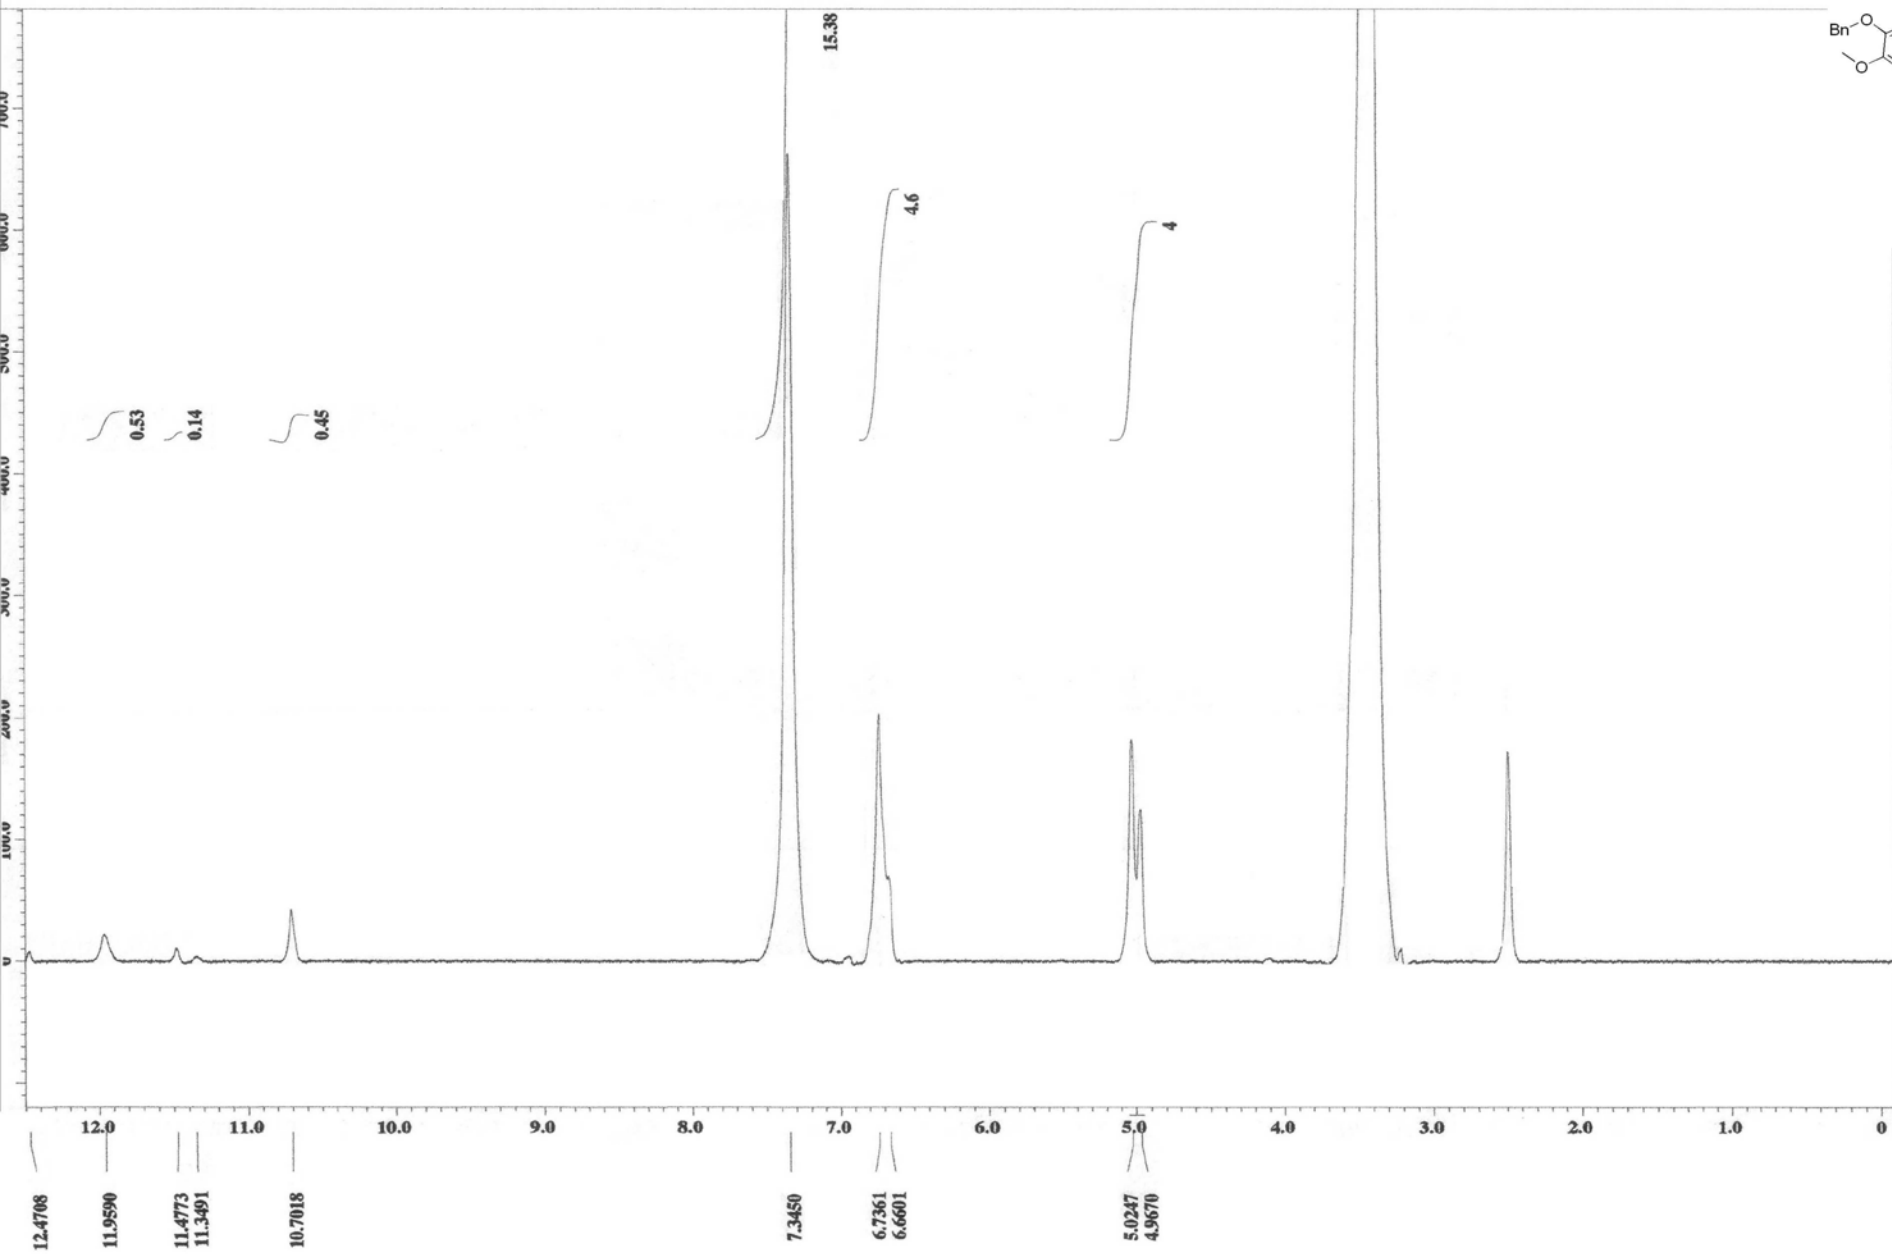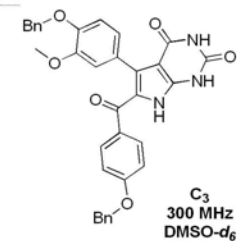

X : parts per Million : 1H

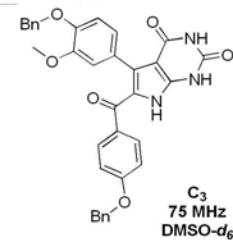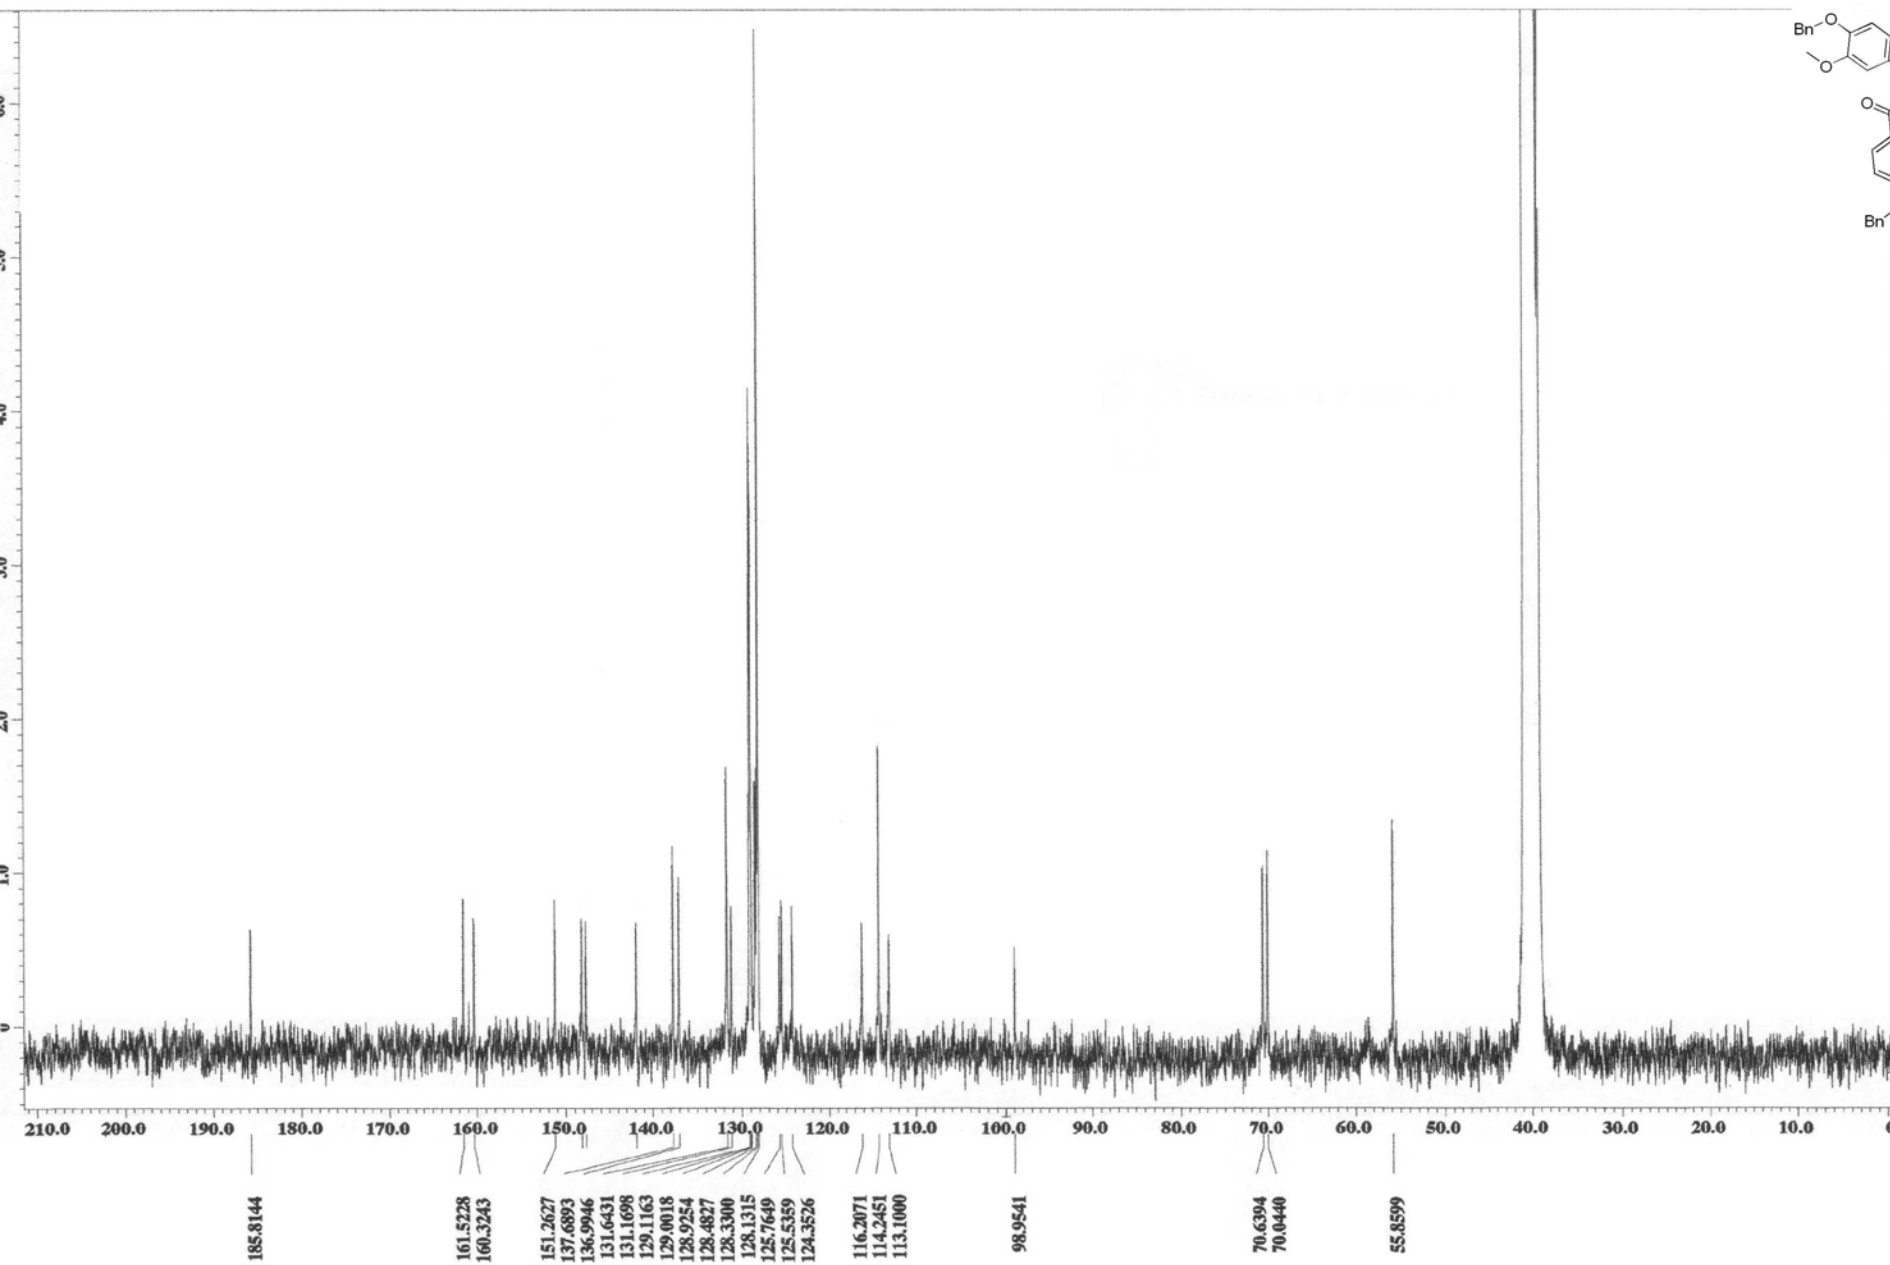

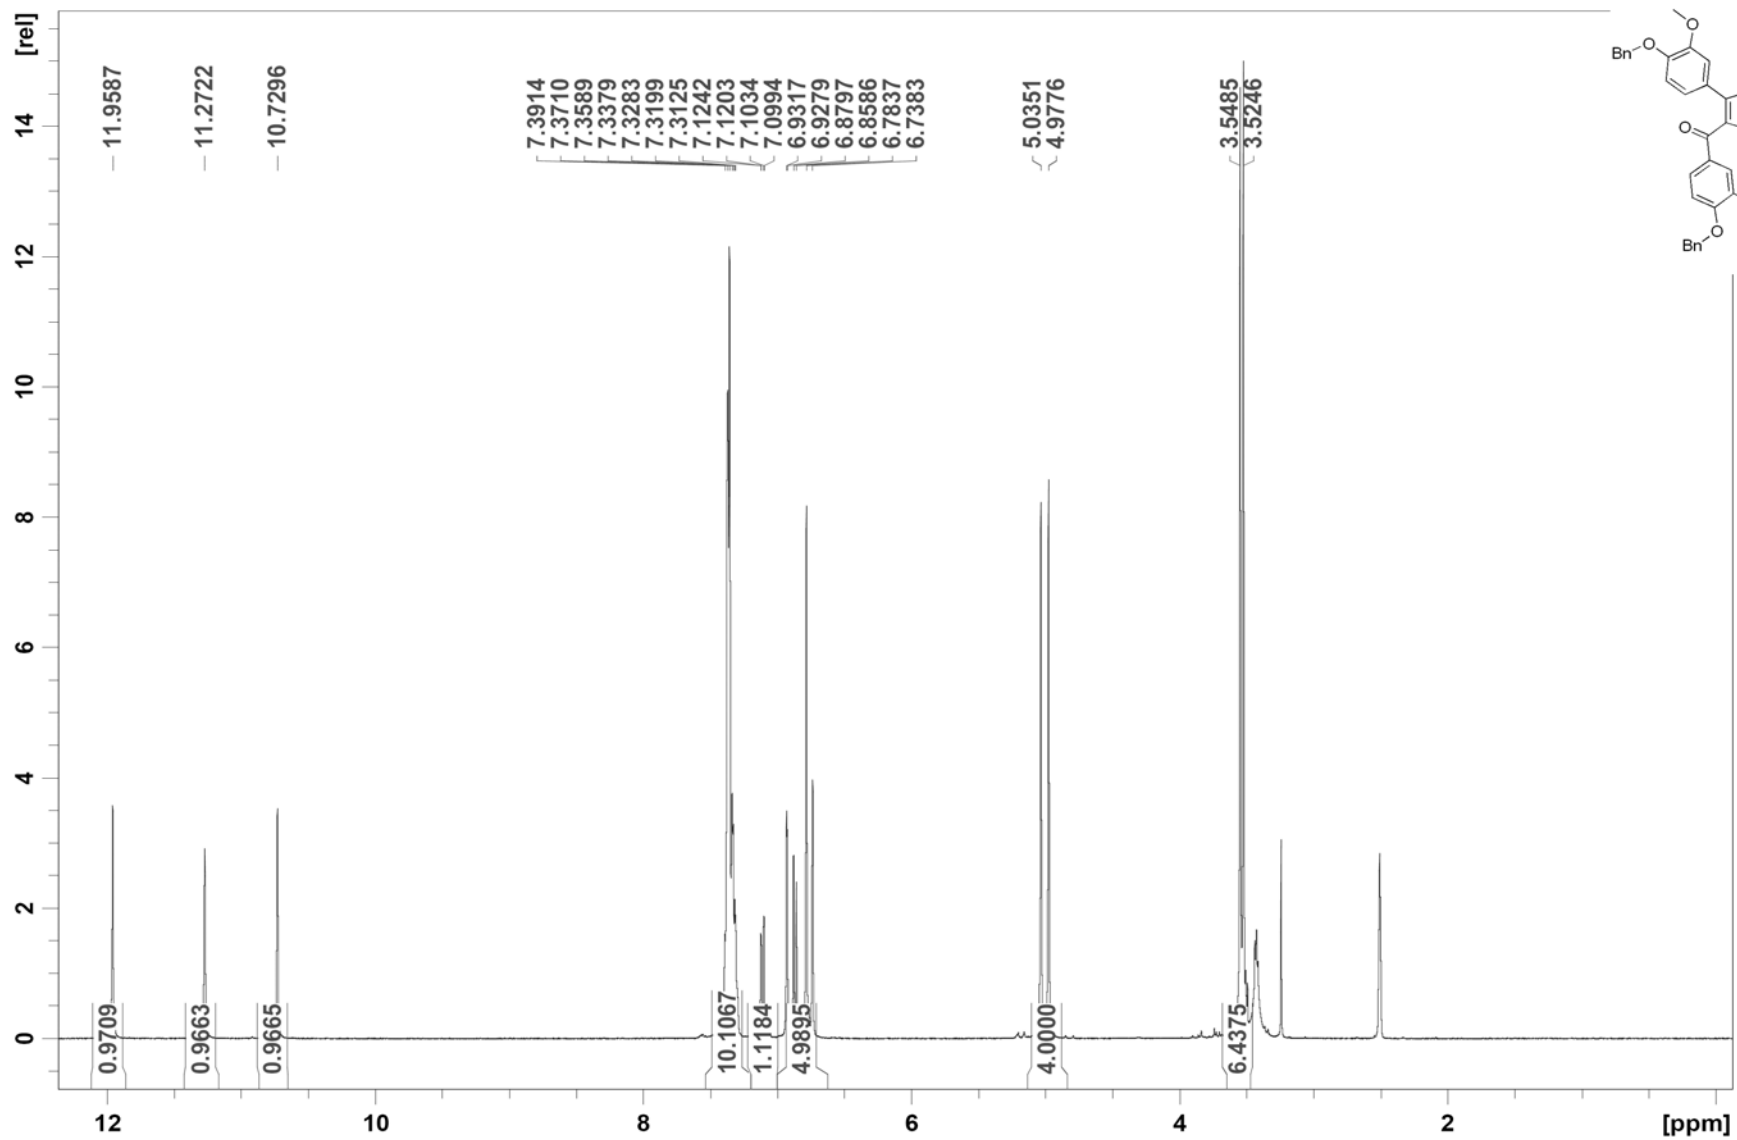



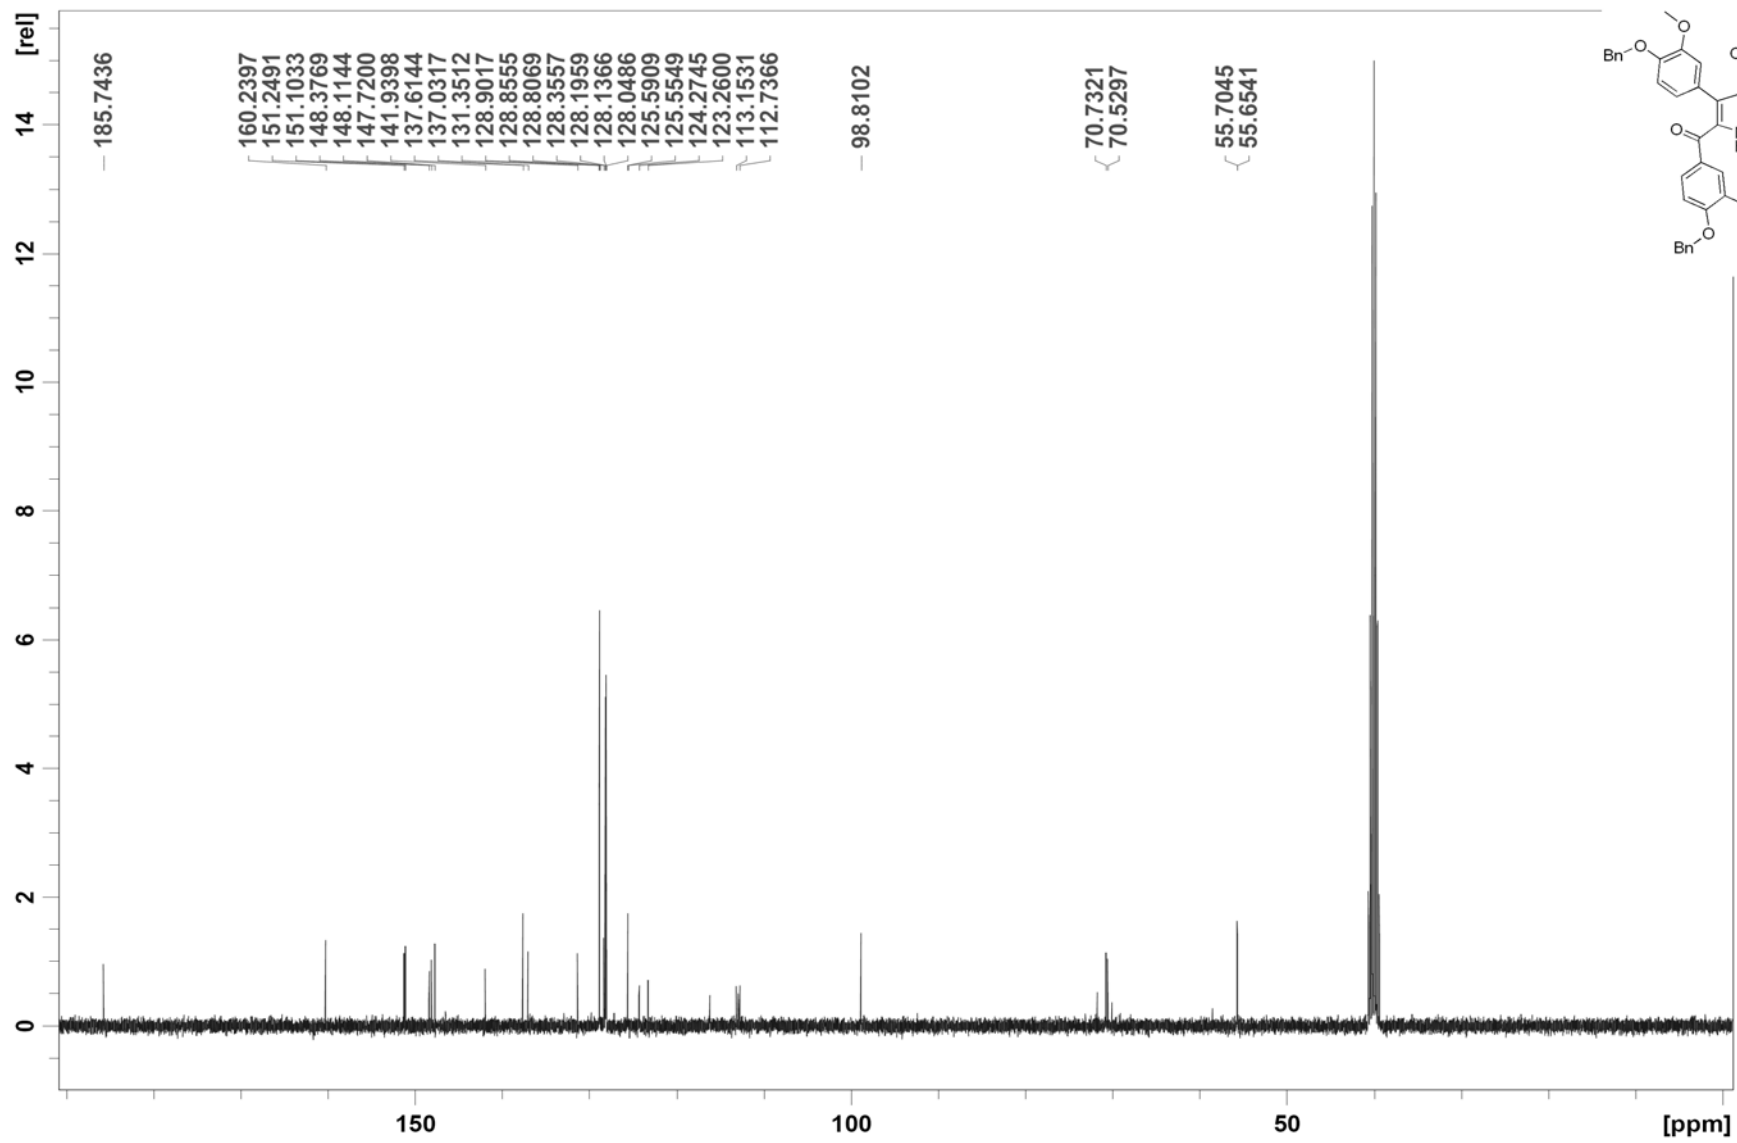

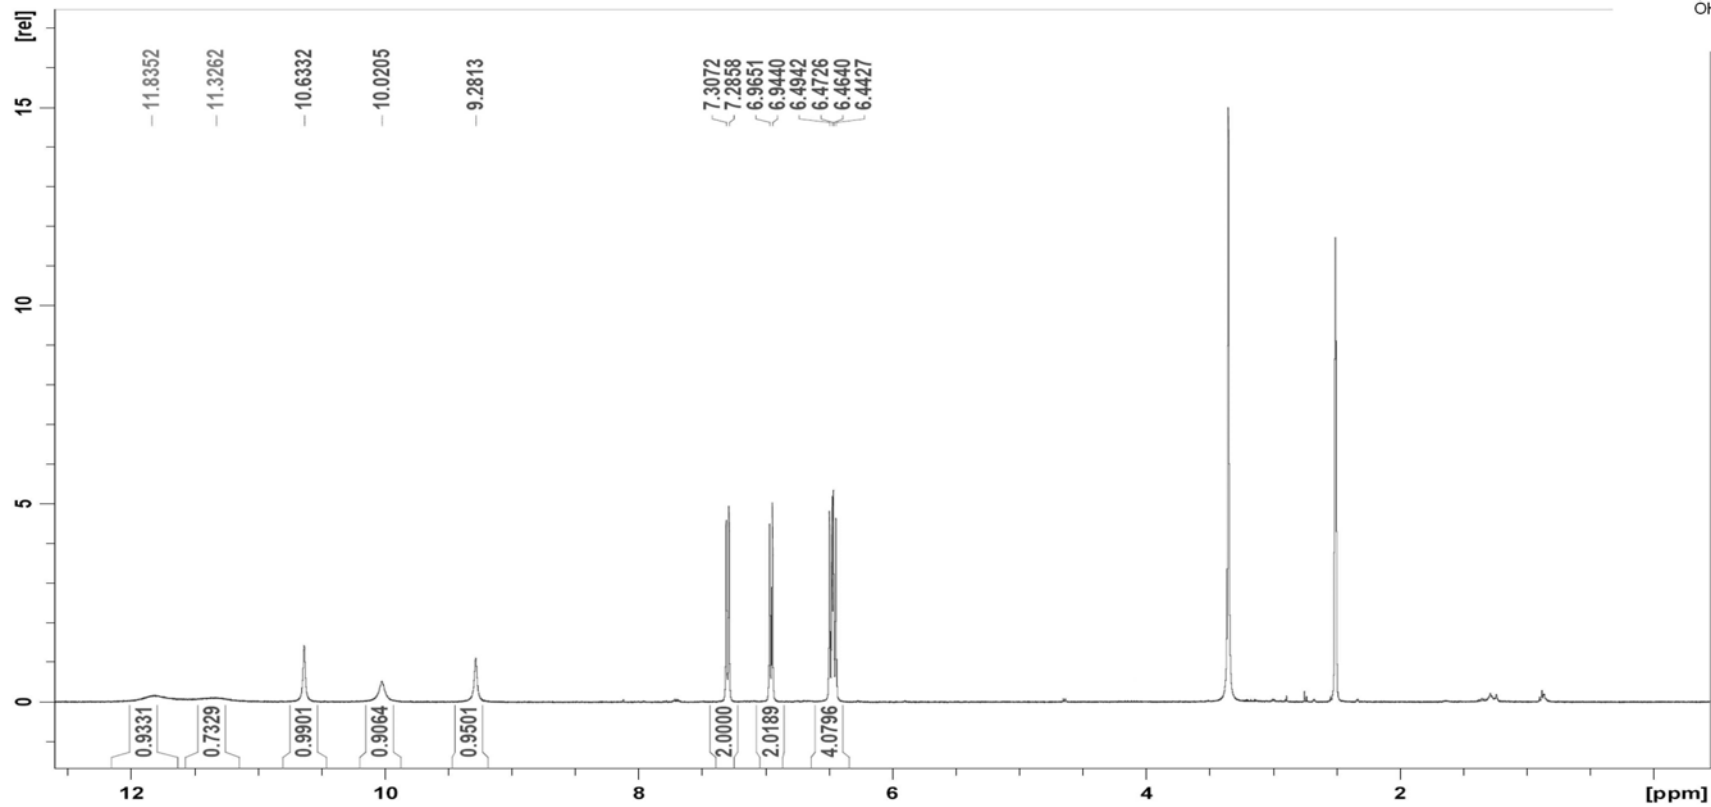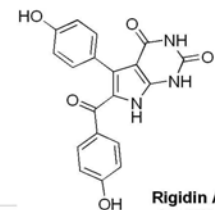

Rigidin A  
400 MHz  
DMSO-d<sub>6</sub>

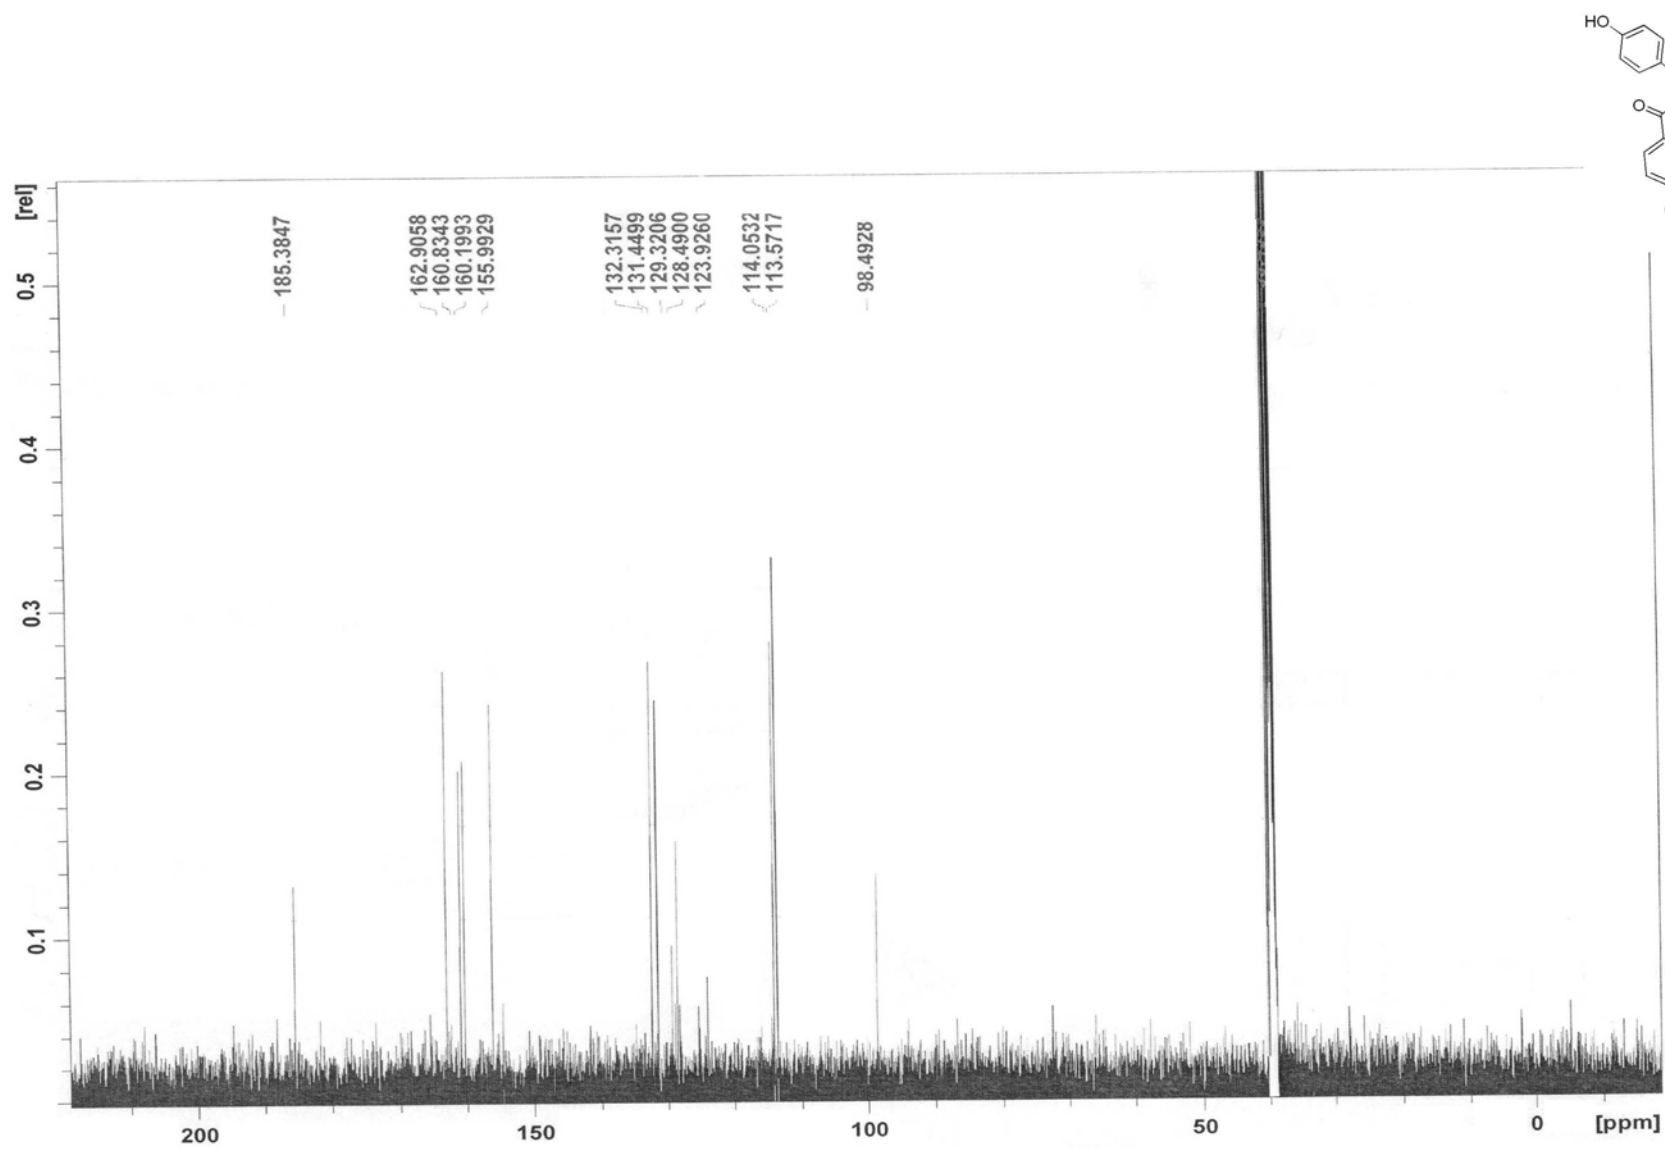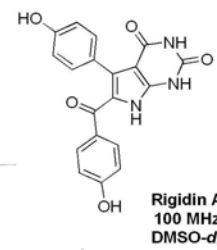

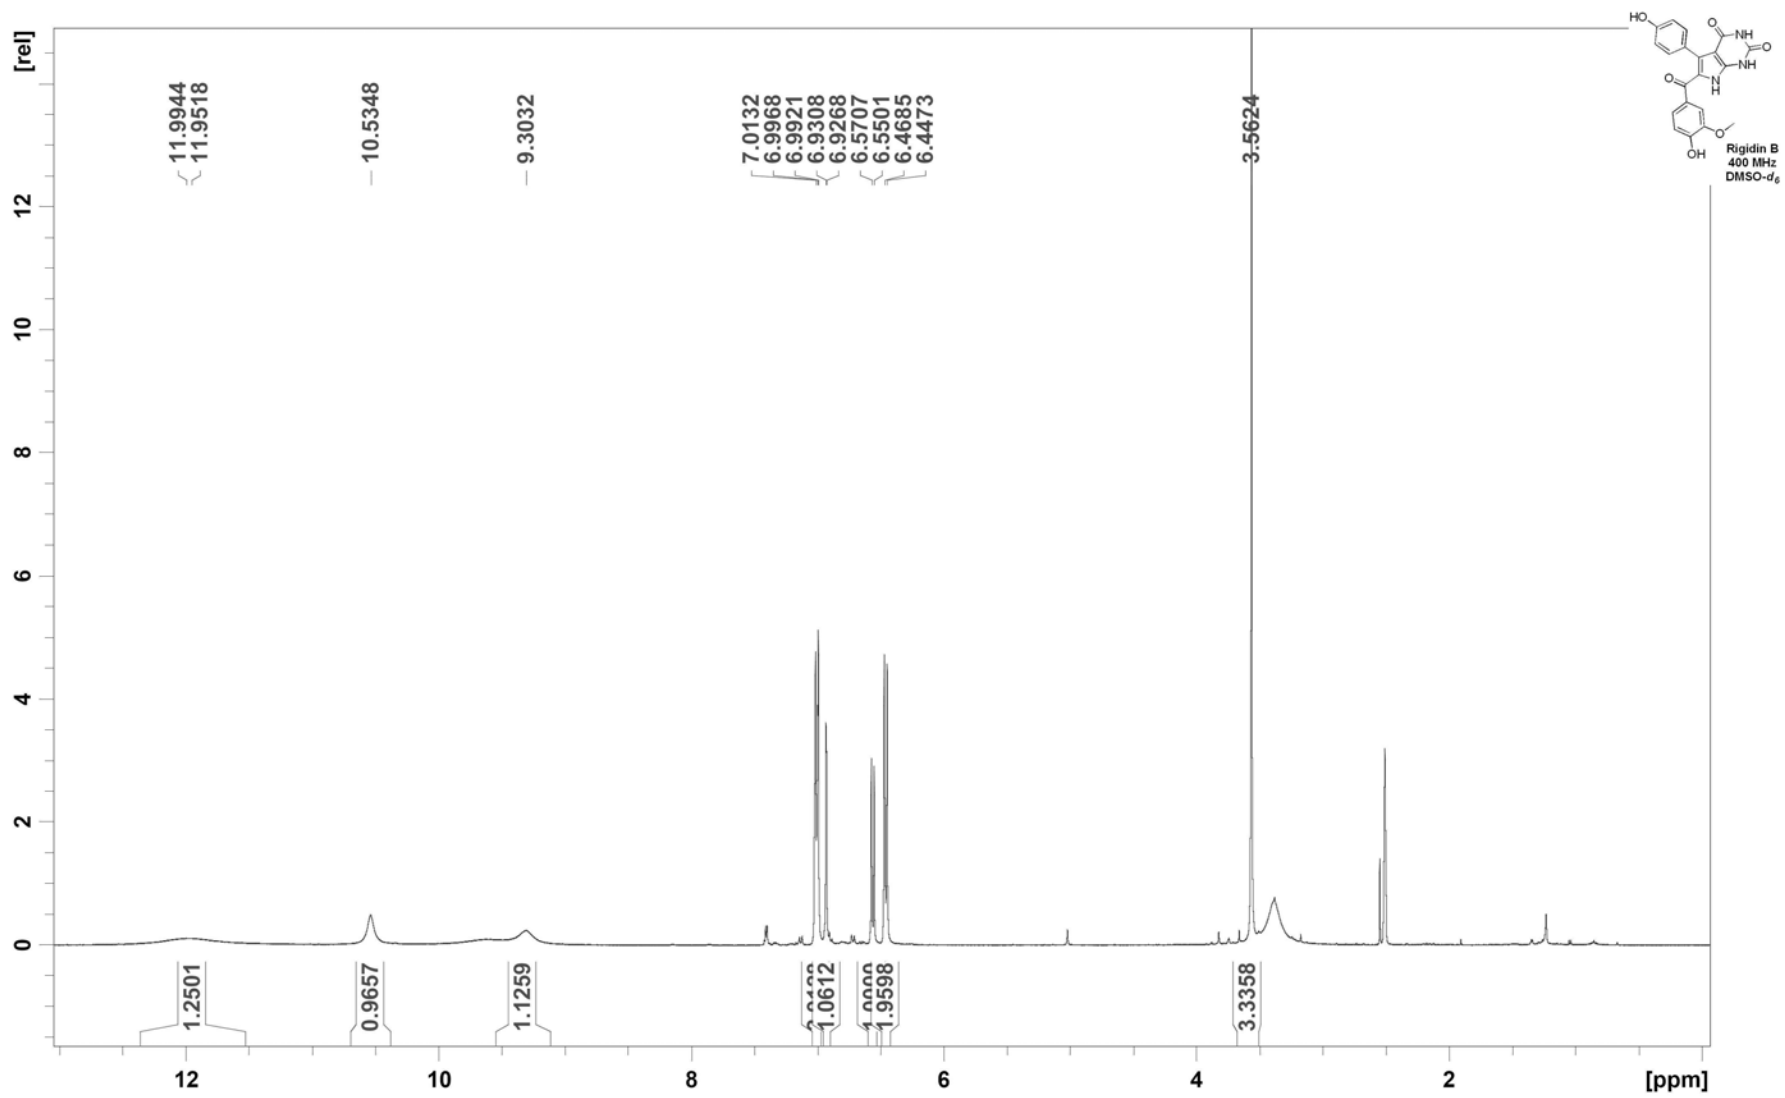



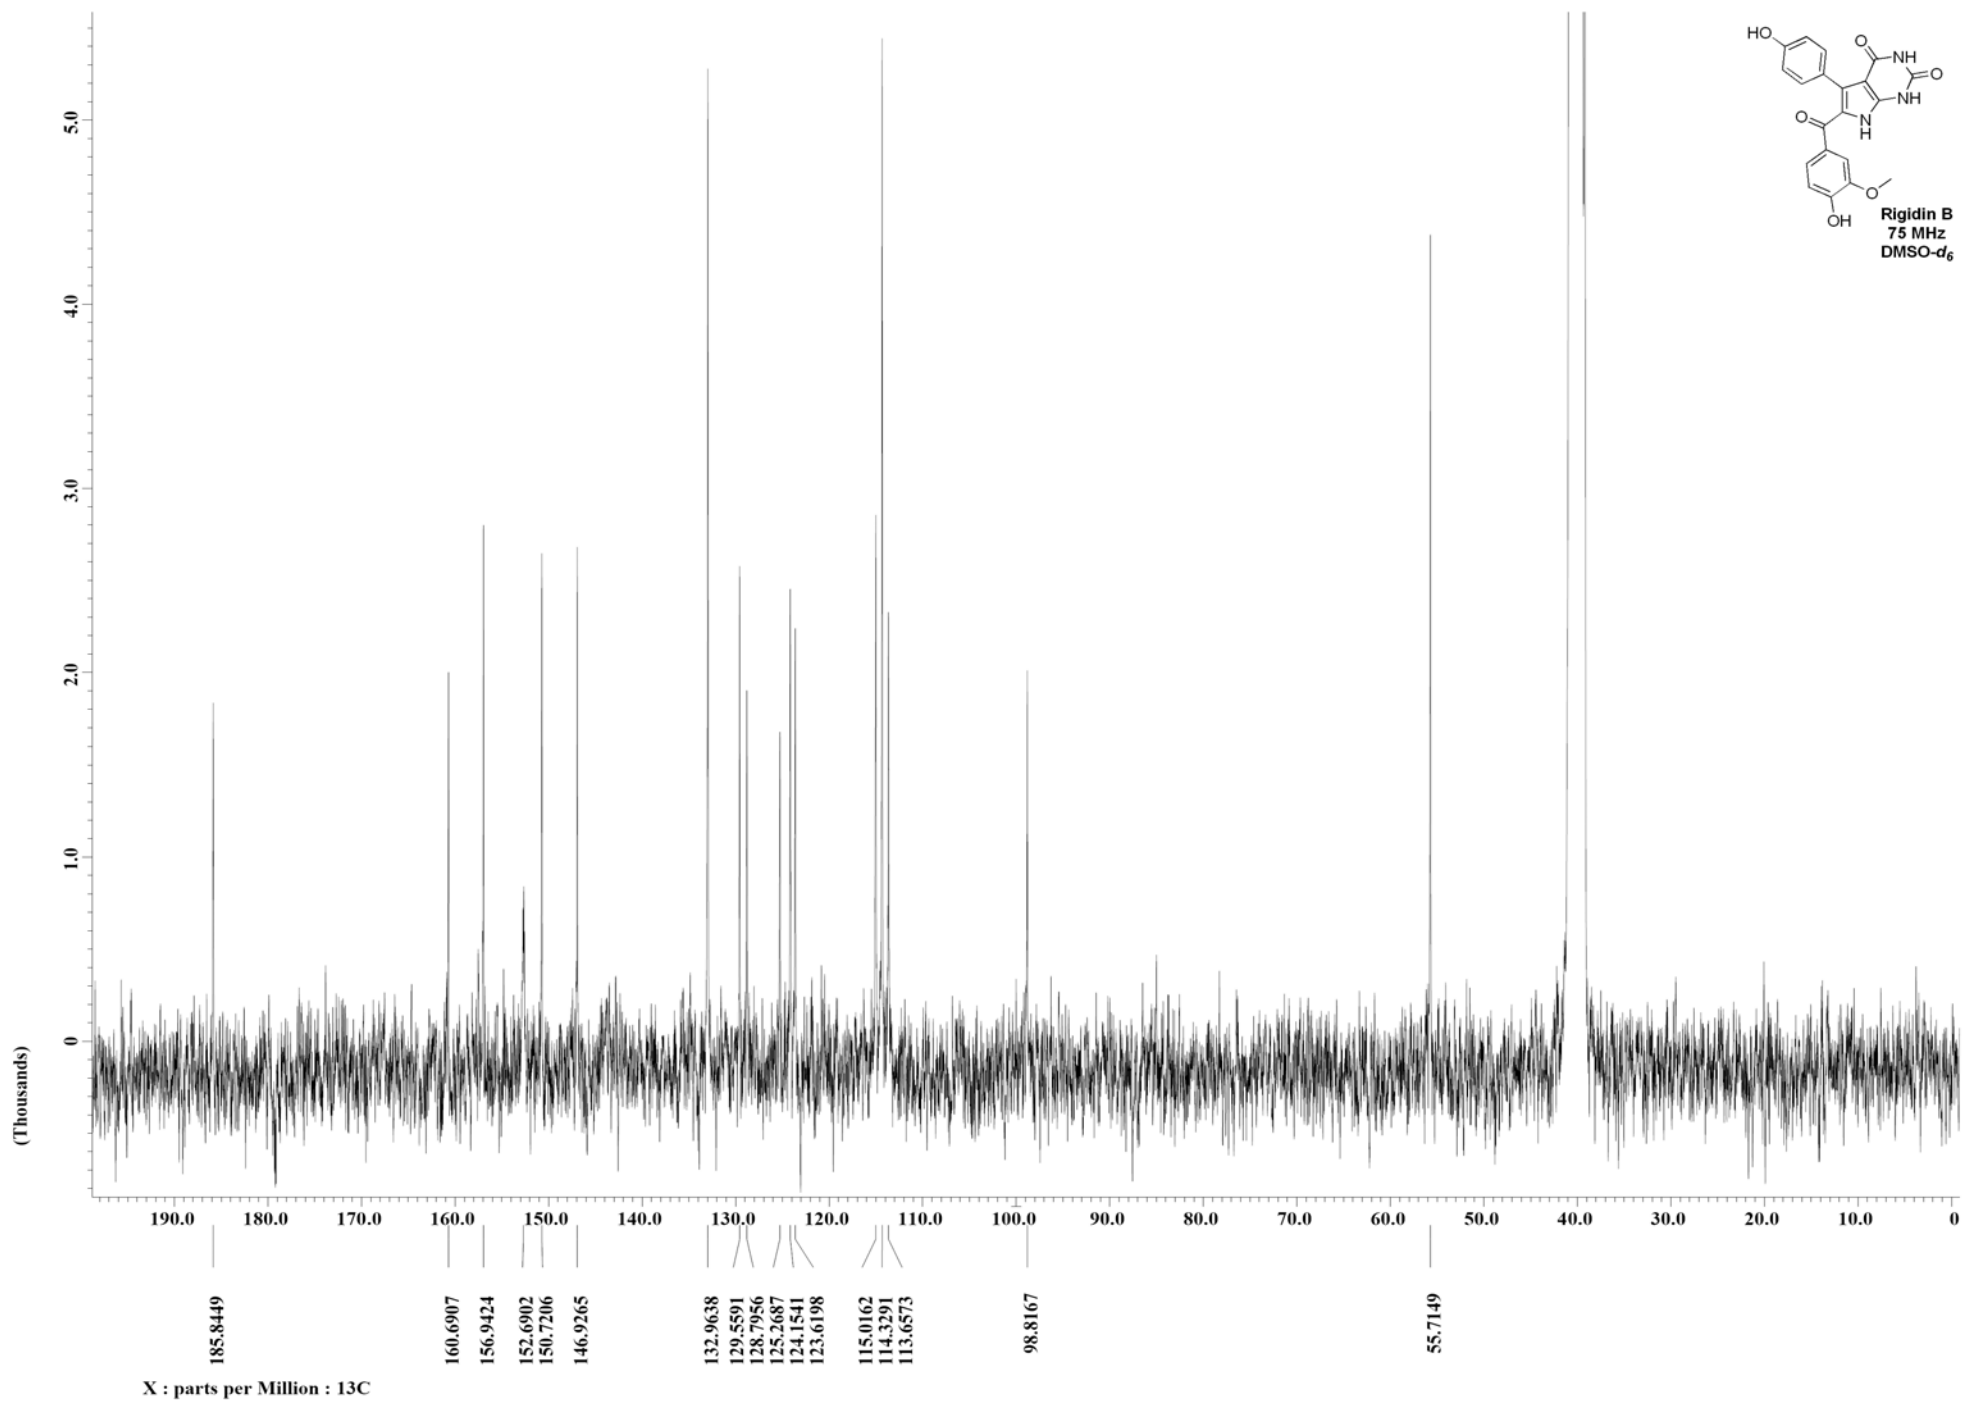

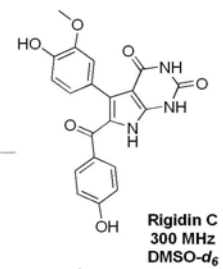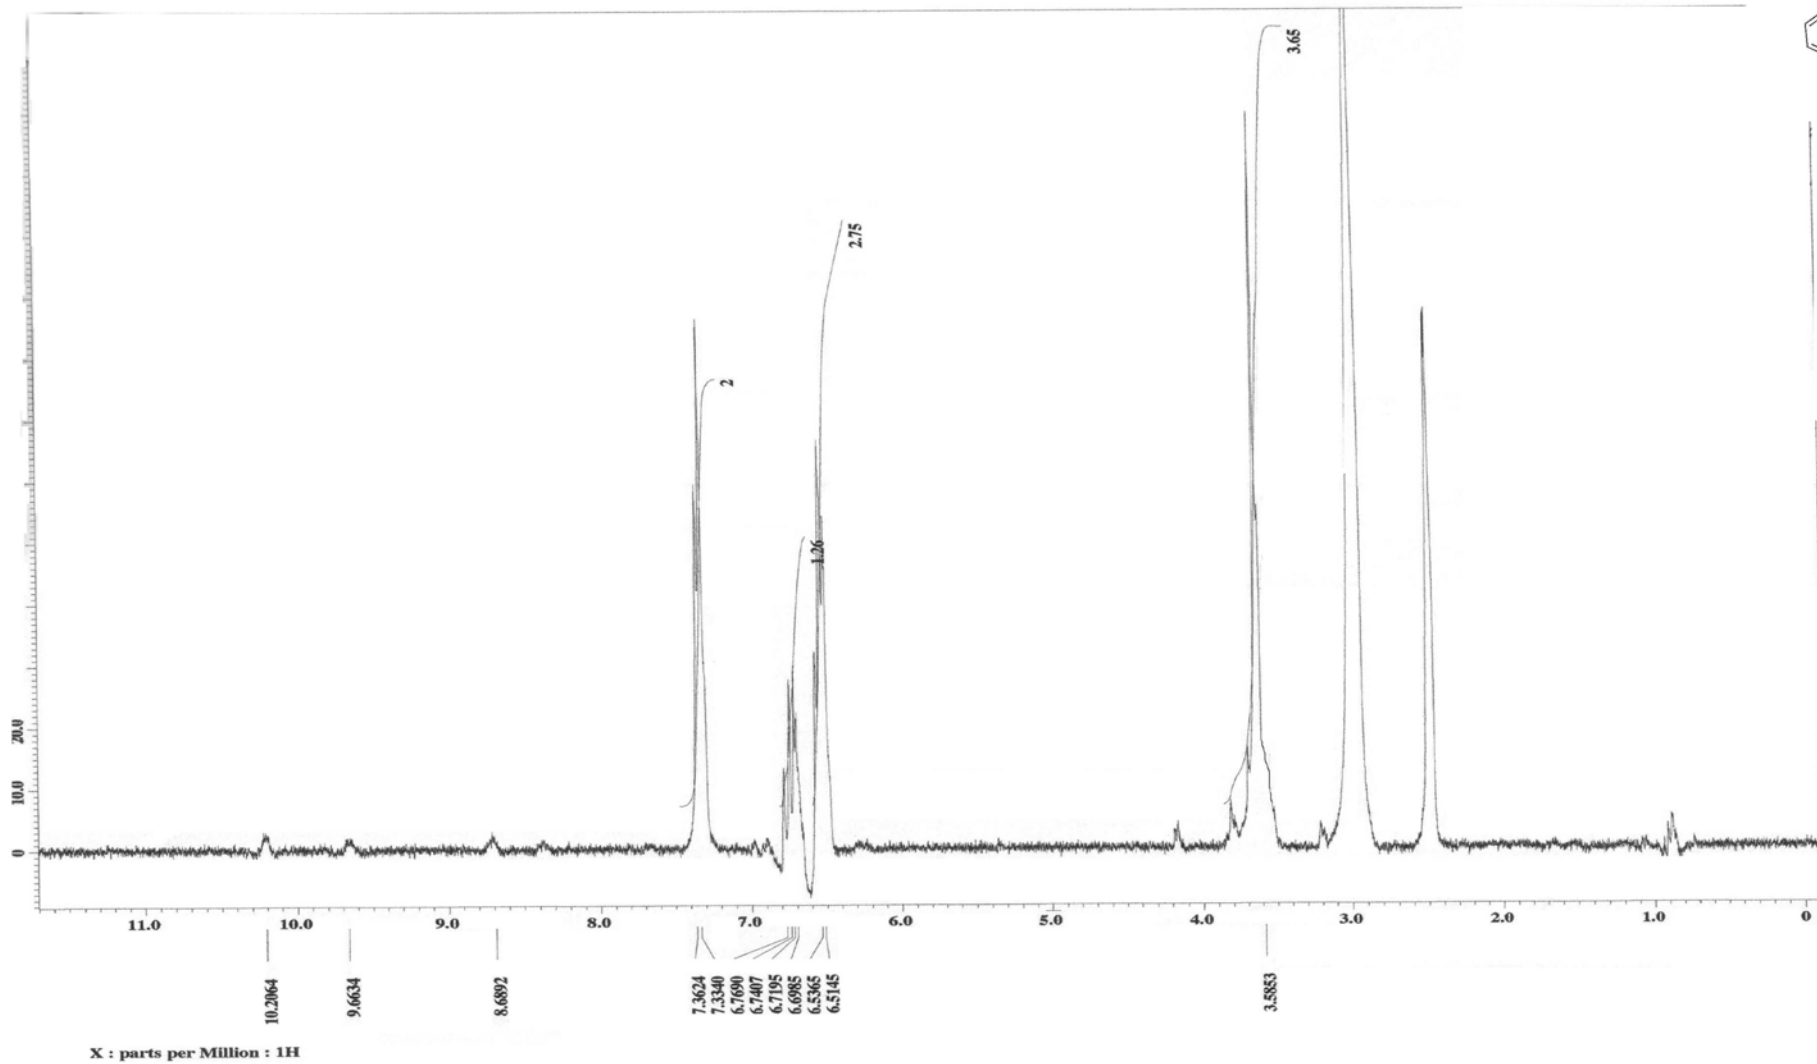

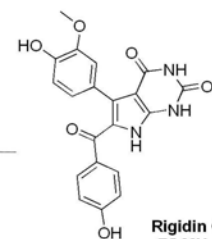

Rigidin C  
75 MHz  
DMSO-d<sub>6</sub>

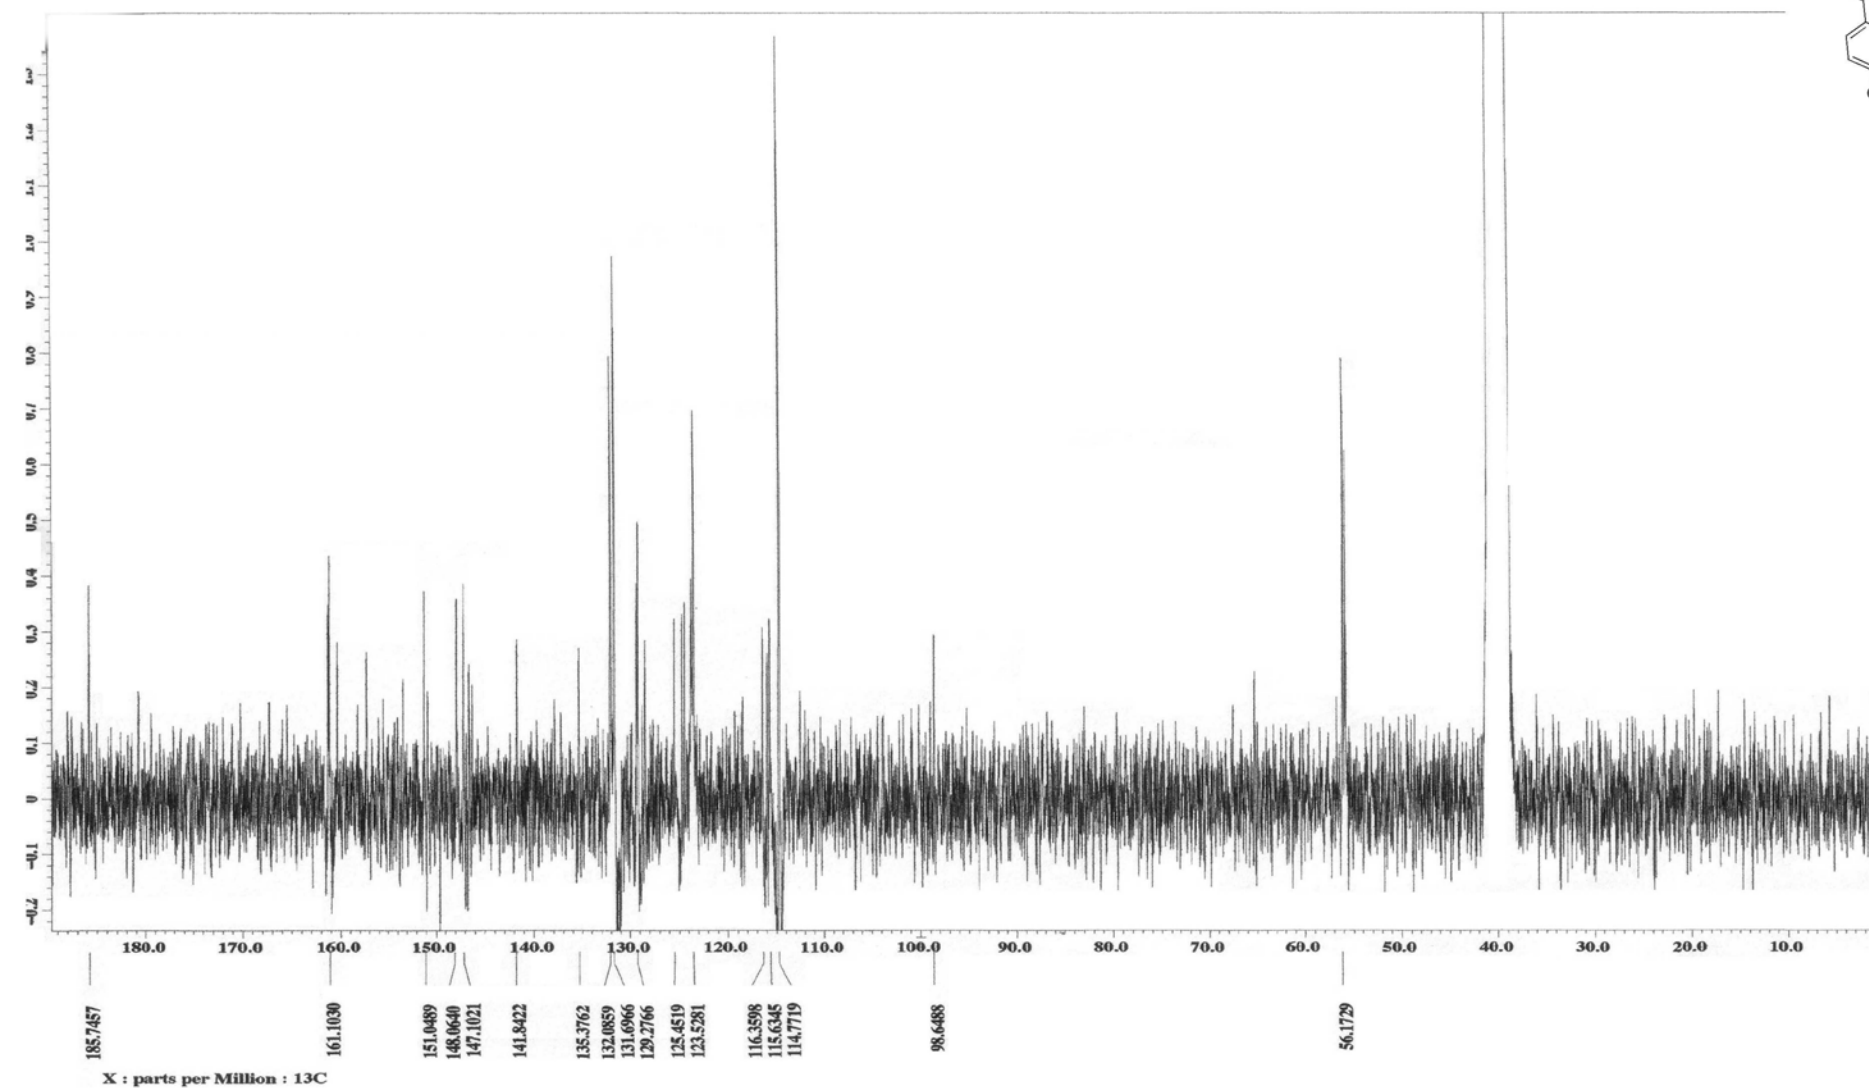

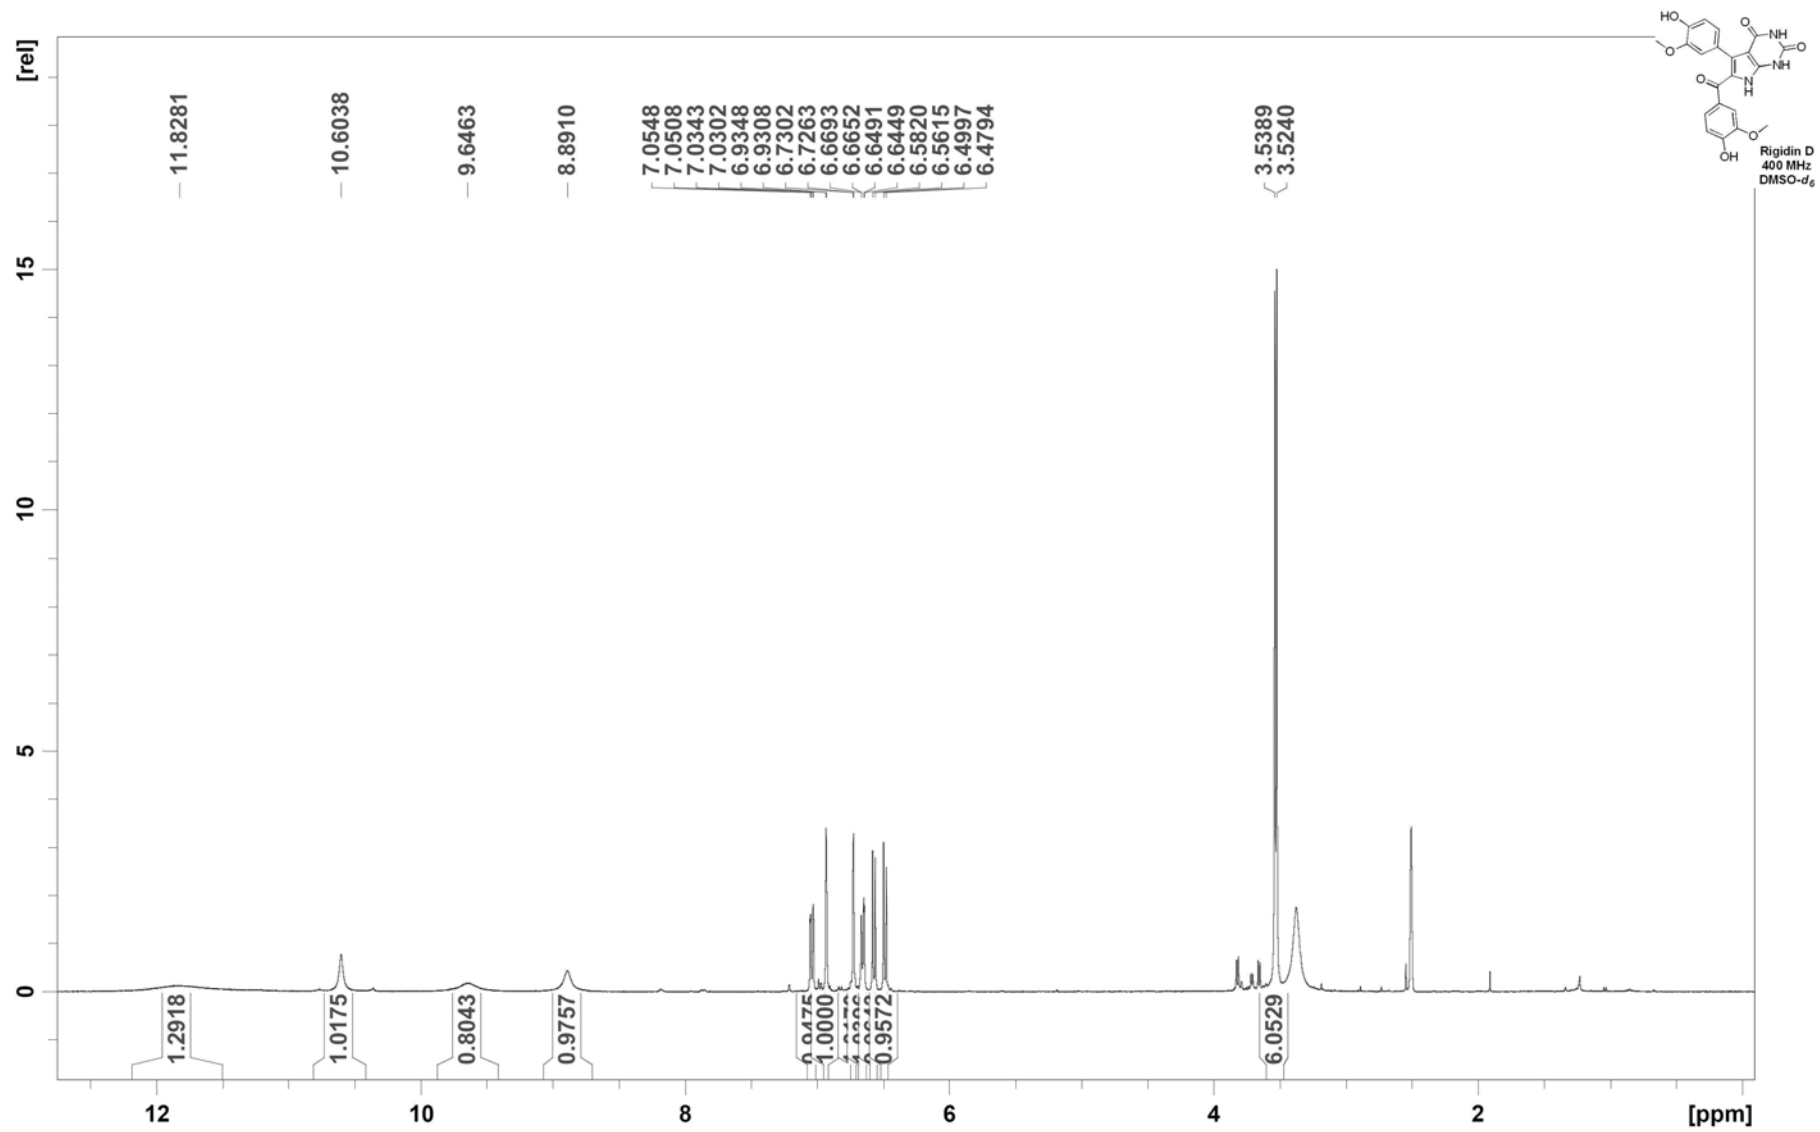



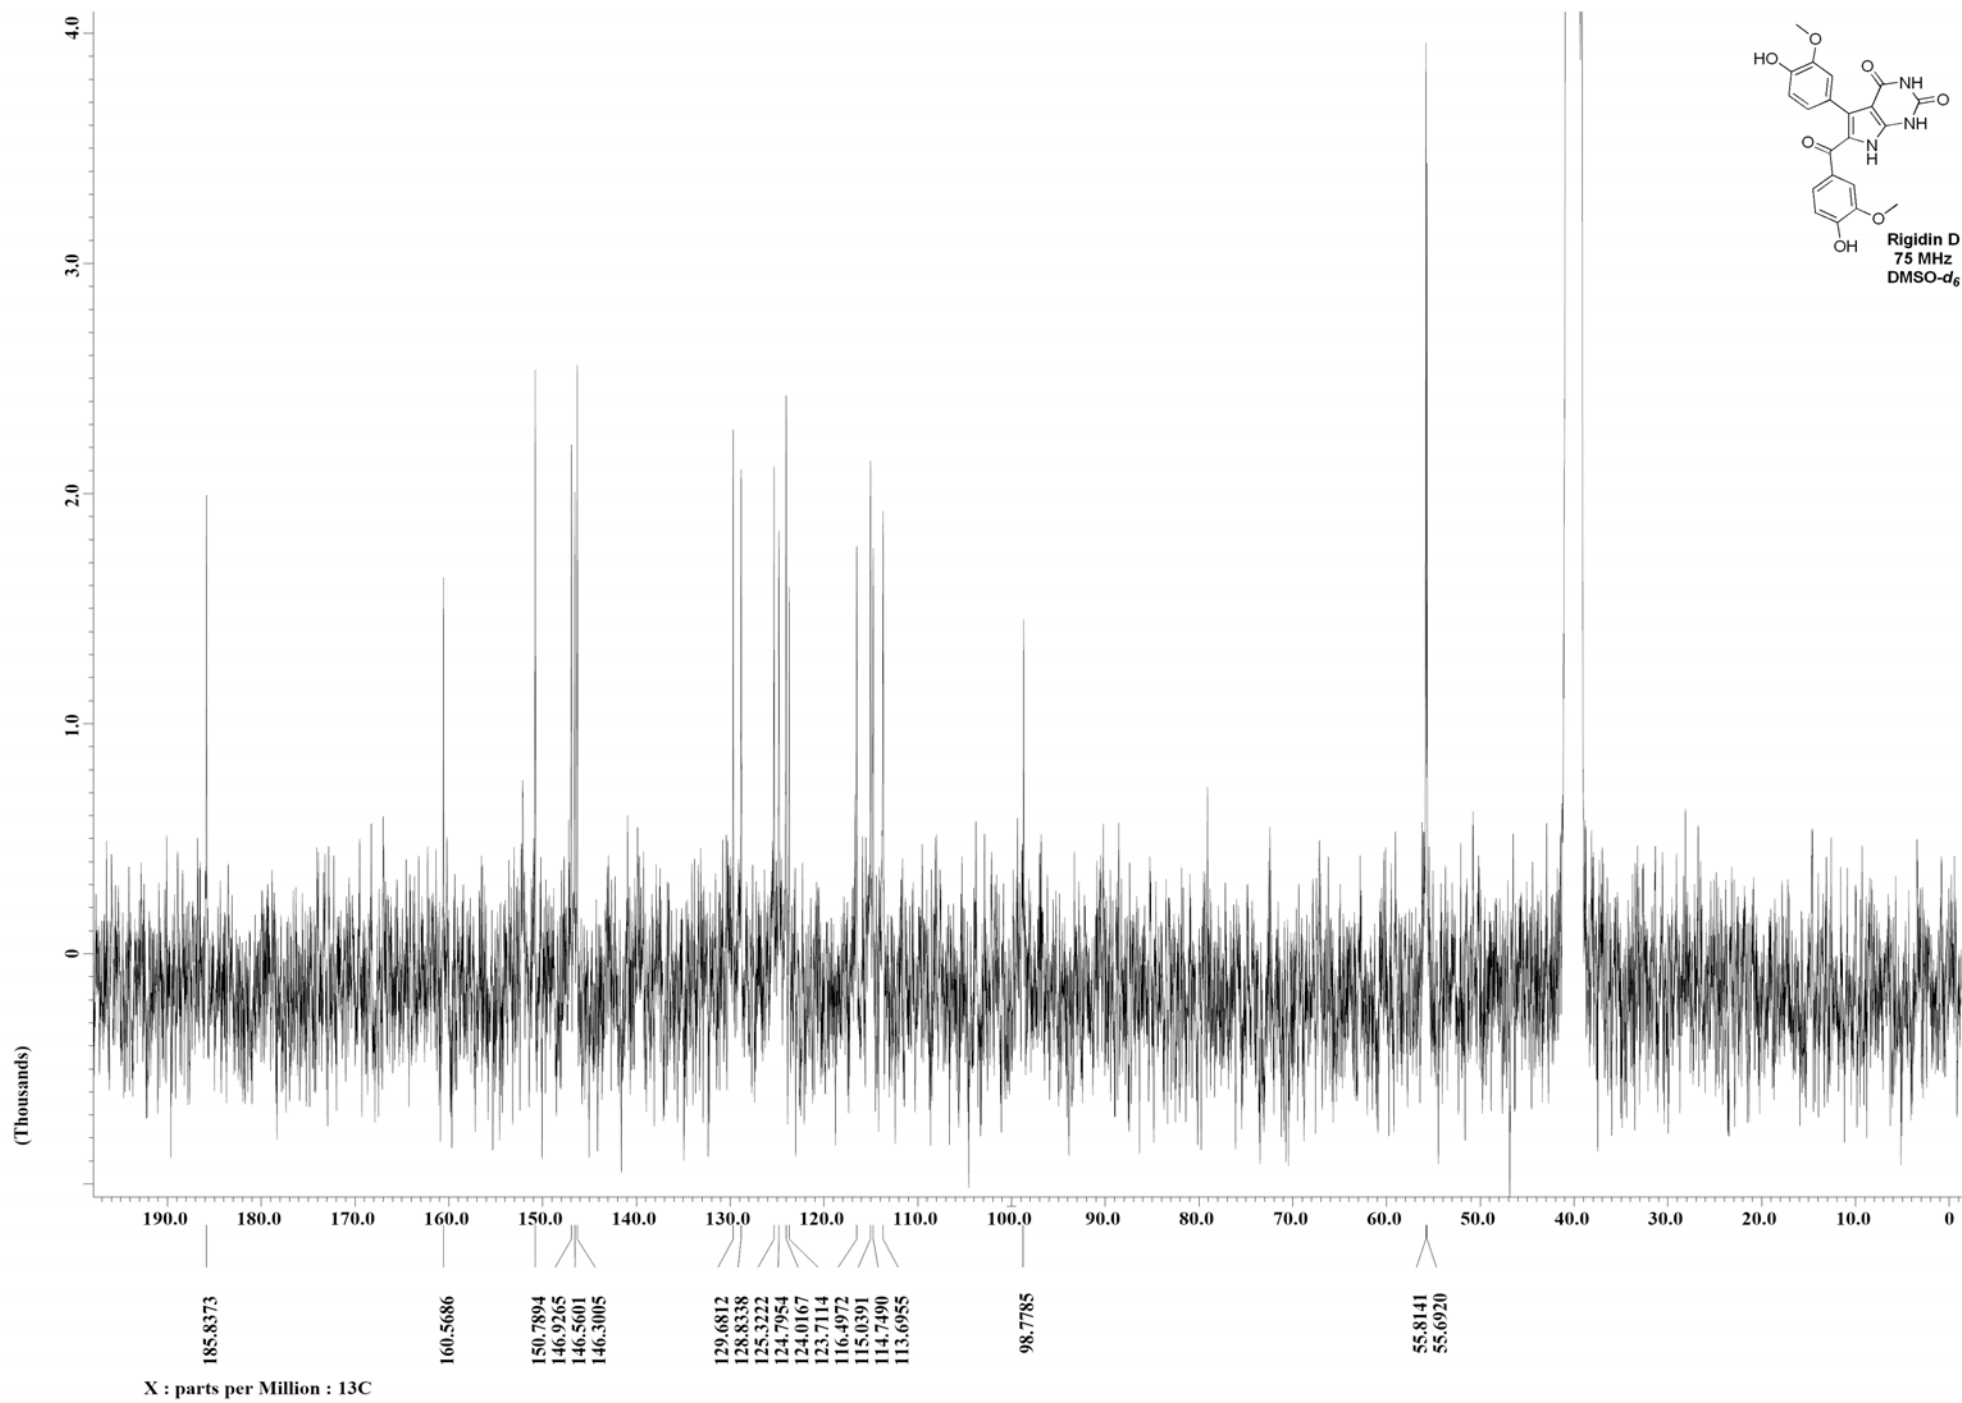

Supplement: NIHMS268343-supplement-1_si_001.pdf [file NIHMS268343-supplement-1_si_001.pdf]
